# Supplementary material for: DNA methylome profiling of all-cause mortality in comparison with age-associated methylation patterns
Source: Clin Epigenetics. 2019 Feb 8;11:23. doi: 10.1186/s13148-019-0622-4 (PMC6368749; doi:10.1186/s13148-019-0622-4)
Supplement: Supplementary file 2 — Table S1 List of significant CpGs (FDR < 0.05) found using the Cox-proportional hazard model for finding CpGs associated with all-cause mortality. (CSV 427 kb) [file 13148_2019_622_MOESM2_ESM.csv]

CpGid	beta	se	z	p	CI.2.5..	CI.97.5..	fdr	Infinium_Design_Type	Color_Channel	CHR	MAPINFO	Strand	Probe_SNPs	UCSC_RefGene_Name	UCSC_RefGene_Accession	UCSC_RefGene_Group	UCSC_CpG_Islands_Name	Relation_to_UCSC_CpG_Island
cg00003305	0.269004419	0.054424149	4.942739986	7.70E-07	0.162	0.376	0.016988272	II	NA	19	30715645	R	NA	NA	NA	NA	chr19:30715549-30715753	Island
cg00008695	0.508543408	0.1208416	4.208347188	2.57E-05	0.272	0.745	0.026726295	II	NA	8	960721	R	NA	NA	NA	NA	chr8:962315-962747	N_Shore
cg00013441	-0.50888335	0.12937918	-3.933270805	8.38E-05	-0.762	-0.255	0.034743645	I	Red	12	123258908	R	NA	CCDC62;CCDC62;CCDC62	NM_201435;NR_027918;NM_032573	TSS200;TSS200;TSS200	NA	NA
cg00014289	0.574058002	0.158665552	3.618038037	0.000296845	0.263	0.885	0.049188294	II	NA	11	124709875	F	NA	NA	NA	NA	chr11:124709222-124709957	Island
cg00021237	-0.387583771	0.105683423	-3.667403641	0.000245026	-0.595	-0.18	0.046481088	I	Grn	8	67525849	F	NA	MYBL1;MYBL1	NM_001080416;NM_001144755	TSS1500;TSS1500	chr8:67524607-67526059	Island
cg00021933	0.293697994	0.080928111	3.629122064	0.000284387	0.135	0.452	0.048713332	I	Red	1	86082316	R	NA	NA	NA	NA	chr1:86081700-86082068	S_Shore
cg00026853	-0.206499762	0.055099107	-3.747787844	0.000178401	-0.314	-0.099	0.04227347	I	Grn	16	30934156	R	NA	NCRNA00095	NR_024348	Body	chr16:30933637-30935774	Island
cg00040446	-0.255510169	0.070026649	-3.648756194	0.000263513	-0.393	-0.118	0.047428282	I	Red	1	40367965	F	NA	MYCL1;MYCL1;MYCL1	NM_005376;NM_001033081;NM_001033082	TSS1500;TSS1500;TSS1500	chr1:40366595-40368213	Island
cg00044950	0.165570249	0.043152539	3.836859955	0.000124617	0.081	0.25	0.038244808	I	Red	6	31855393	F	NA	EHMT2;EHMT2	NM_006709;NM_025256	Body;Body	chr6:31856896-31857104	N_Shore
cg00066828	0.389192243	0.081954143	4.748902601	2.05E-06	0.229	0.55	0.018828562	I	Red	17	1837612	F	NA	NA	NA	NA	chr17:1837587-1837859	Island
cg00067032	0.320728571	0.083616191	3.835723304	0.000125195	0.157	0.485	0.038301083	I	Grn	6	32975816	F	rs41542323	HLA-DOA	NM_002119	Body	chr6:32975684-32975926	Island
cg00076797	0.610694843	0.16589259	3.68126655	0.000232078	0.286	0.936	0.045599661	II	NA	1	111022914	R	NA	CYMP	NR_003599	TSS1500	NA	NA
cg00082540	0.683697825	0.186114743	3.673528573	0.000239224	0.319	1.048	0.046016672	II	NA	21	46396774	R	NA	C21orf70	NM_058190	3'UTR	NA	NA
cg00101350	0.381551174	0.094165295	4.051929873	5.08E-05	0.197	0.566	0.030511754	I	Red	22	39883192	R	NA	MGAT3;MGAT3	NM_002409;NM_001098270	5'UTR;TSS200	chr22:39883515-39885010	N_Shore
cg00106196	0.590574855	0.161624009	3.654004482	0.000258182	0.274	0.907	0.047018132	II	NA	1	3172684	F	rs17398063	PRDM16;PRDM16	NM_022114;NM_199454	Body;Body	NA	NA
cg00111436	-0.343546971	0.094483867	-3.636038431	0.000276863	-0.529	-0.158	0.048317876	I	Red	12	121837826	R	NA	RNF34;RNF34	NM_194271;NM_025126	TSS200;TSS200	chr12:121837380-121838396	Island
cg00141447	0.600221543	0.162504263	3.693574137	0.000221124	0.282	0.919	0.045006505	I	Red	13	113544658	R	NA	NA	NA	NA	chr13:113548643-113549127	N_Shelf
cg00143809	0.573961753	0.132392273	4.335311553	1.46E-05	0.314	0.833	0.024222597	I	Red	22	50720552	F	NA	PLXNB2	NM_012401	Body	chr22:50718979-50721884	Island
cg00154443	-0.401217464	0.072732562	-5.516338941	3.46E-08	-0.544	-0.259	0.00840262	I	Red	16	71917454	R	NA	ATXN1L;ZNF821	NR_024612;NM_017530	Body;TSS200	chr16:71917738-71918542	N_Shore
cg00161229	-0.261994985	0.068439537	-3.828123277	0.000129124	-0.396	-0.128	0.038626384	I	Red	6	114292531	R	NA	HDAC2	NM_001527	TSS200	chr6:114291411-114292767	Island
cg00162541	0.417948708	0.107011225	3.905652964	9.40E-05	0.208	0.628	0.035550511	II	NA	19	16607016	F	NA	C19orf44;CALR3	NM_032207;NM_145046	TSS200;TSS200	chr19:16606740-16607444	Island
cg00175344	-0.393873152	0.087570679	-4.497774308	6.87E-06	-0.566	-0.222	0.020594892	I	Grn	13	79168044	F	rs76646083	NA	NA	NA	chr13:79170114-79171231	N_Shelf
cg00175838	0.725575898	0.186769678	3.884869899	0.000102385	0.36	1.092	0.036379884	I	Grn	6	31695027	F	NA	DDAH2	NM_013974	Body	chr6:31695894-31698245	N_Shore
cg00179196	0.38299296	0.105754959	3.621512998	0.000292885	0.176	0.59	0.049092143	I	Grn	16	117934	F	NA	RHBDF1	NM_022450	5'UTR	NA	NA
cg00192275	0.386735	0.097137415	3.981318652	6.85E-05	0.196	0.577	0.032844427	I	Red	10	134874942	R	NA	NA	NA	NA	chr10:134876330-134878539	N_Shore
cg00211110	-0.689649093	0.175783575	-3.923285165	8.73E-05	-1.034	-0.345	0.034883186	I	Grn	12	51157716	R	NA	ATF1	NM_005171	TSS200	chr12:51157498-51158842	Island
cg00219956	0.401355324	0.104225675	3.850829713	0.000117718	0.197	0.606	0.037707725	I	Red	16	30794205	R	NA	ZNF629	NM_001080417	Body	chr16:30793716-30795268	Island
cg00220413	0.300652322	0.074020254	4.061757507	4.87E-05	0.156	0.446	0.030242045	I	Red	17	7319074	F	NA	NLGN2	NM_020795	Body	chr17:7320371-7320945	N_Shore
cg00224299	0.941801112	0.254033916	3.707383355	0.000209412	0.444	1.44	0.044305183	II	NA	1	26185997	F	NA	C1orf135	NM_024037	TSS200	chr1:26185472-26186356	Island
cg00231006	-0.642925465	0.166873649	-3.852768065	0.00011679	-0.97	-0.316	0.037634396	I	Red	5	130599637	R	NA	CDC42SE2;CDC42SE2	NM_001038702;NM_020240	TSS200;TSS200	chr5:130599335-130600406	Island
cg00231810	0.29384312	0.080642758	3.643763269	0.000268681	0.136	0.452	0.047777671	I	Red	7	155353618	R	NA	NA	NA	NA	NA	NA
cg00248795	-0.246376788	0.062607485	-3.935260875	8.31E-05	-0.369	-0.124	0.034646859	I	Red	1	100731936	R	NA	RTCD1;RTCD1	NM_001130841;NM_003729	1stExon;1stExon	chr1:100731632-100731999	Island
cg00249030	-0.216385674	0.056778499	-3.811049543	0.000138378	-0.328	-0.105	0.038987826	I	Red	1	33546871	R	NA	ADC;ADC	NM_052998;NM_052998	1stExon;5'UTR	chr1:33546524-33547243	Island
cg00256081	0.381848917	0.102529334	3.724289455	0.000195866	0.181	0.583	0.043426453	I	Red	16	88901299	F	NA	GALNS	NM_000512	Body	chr16:88902175-88902467	N_Shore
cg00258976	-0.203704957	0.049787476	-4.091489975	4.29E-05	-0.301	-0.106	0.029727933	I	Red	16	89283889	F	NA	ZNF778	NM_182531	TSS1500	chr16:89283762-89284616	Island
cg00264467	-0.619893975	0.171772285	-3.608812525	0.000307602	-0.957	-0.283	0.049814664	I	Red	16	4401424	R	NA	Magmas	NM_016069	TSS200	chr16:4400955-4401572	Island
cg00269643	-0.255371117	0.063780673	-4.003894987	6.23E-05	-0.38	-0.13	0.032399883	I	Red	7	128784416	F	NA	TSPAN33	NM_178562	TSS1500	chr7:128784695-128785096	N_Shore
cg00272200	-0.591657282	0.159042537	-3.720119752	0.000199128	-0.903	-0.28	0.043559338	I	Red	5	44388972	F	NA	FGF10	NM_004465	TSS200	NA	NA
cg00275828	0.669804611	0.172140726	3.891029325	9.98E-05	0.332	1.007	0.036032523	II	NA	17	39222690	R	NA	KRTAP2-4	NM_033184	TSS1500	NA	NA
cg00277397	0.603707371	0.165649685	3.644482451	0.00026793	0.279	0.928	0.047777671	II	NA	7	71800412	R	NA	CALN1;CALN1	NM_001017440;NM_031468	5'UTR;Body	chr7:71800757-71802768	N_Shore
cg00297737	-0.818849331	0.226514139	-3.615003177	0.000300344	-1.263	-0.375	0.04944806	I	Red	8	97273749	R	NA	MTERFD1;MTERFD1;PTDSS1	NM_015942;NM_015942;NM_014754	5'UTR;1stExon;TSS1500	chr8:97273615-97274767	Island
cg00300090	-0.170880242	0.046261391	-3.693798204	0.000220929	-0.262	-0.08	0.044993185	I	Red	3	4345167	R	NA	SETMAR;SETMAR	NM_006515;NR_024022	1stExon;TSS200	chr3:4345005-4345342	Island
cg00320862	-0.32897082	0.086821382	-3.789053017	0.000151223	-0.499	-0.159	0.040279156	I	Red	3	170588302	R	NA	RPL22L1	NM_001099645	TSS1500	chr3:170587936-170588270	S_Shore
cg00327796	0.234270341	0.059209728	3.956619079	7.60E-05	0.118	0.35	0.033698302	I	Red	3	23032191	F	rs680110	NA	NA	NA	NA	NA
cg00334245	-0.315594611	0.081891226	-3.853826923	0.000116286	-0.476	-0.155	0.037634396	I	Red	6	30923446	R	NA	NA	NA	NA	chr6:30923208-30923624	Island
cg00338893	0.337518943	0.091981203	3.669433868	0.000243088	0.157	0.518	0.046423493	II	NA	7	140714614	R	NA	MRPS33;MRPS33	NM_053035;NM_016071	5'UTR;TSS200	chr7:140714478-140714943	Island
cg00357593	-0.408867172	0.103798355	-3.939052531	8.18E-05	-0.612	-0.205	0.034533653	I	Red	19	14530417	F	NA	DDX39	NM_005804	TSS1500	chr19:14529731-14530505	Island
cg00367532	0.279647047	0.072876799	3.837257531	0.000124416	0.137	0.422	0.038212771	I	Red	15	74703141	R	NA	SEMA7A;SEMA7A;SEMA7A	NM_003612;NM_001146030;NM_001146029	Body;Body;Body	chr15:74703053-74703255	Island
cg00382463	0.349065834	0.086625423	4.029600344	5.59E-05	0.179	0.519	0.031469154	II	NA	19	30718424	R	NA	NA	NA	NA	chr19:30716328-30719970	Island
cg00387170	0.601116044	0.165197825	3.638764879	0.000273949	0.277	0.925	0.047989801	II	NA	6	41514002	R	NA	FOXP4;FOXP4;FOXP4	NM_001012427;NM_001012426;NM_138457	TSS200;TSS200;TSS200	chr6:41513652-41516189	Island
cg00429402	-0.509482191	0.125126348	-4.071741885	4.67E-05	-0.755	-0.264	0.030242045	I	Red	10	94833658	R	NA	CYP26A1;CYP26A1;CYP26A1	NM_000783;NM_057157;NM_000783	1stExon;5'UTR;5'UTR	chr10:94833272-94835256	Island
cg00437134	-0.645188336	0.178497561	-3.614549868	0.00030087	-0.995	-0.295	0.04944806	I	Grn	2	198364743	F	NA	HSPE1;HSPE1;HSPD1;HSPD1	NM_002157;NM_002157;NM_199440;NM_002156	1stExon;5'UTR;5'UTR;TSS200	chr2:198363689-198365405	Island
cg00449899	-0.405472589	0.105313899	-3.850133668	0.000118053	-0.612	-0.199	0.037732938	I	Grn	8	53626436	R	NA	RB1CC1;RB1CC1	NM_001083617;NM_014781	5'UTR;5'UTR	chr8:53626005-53627501	Island
cg00469264	0.491277496	0.135548035	3.624379326	0.000289656	0.226	0.757	0.04899929	I	Grn	12	21827318	F	NA	NA	NA	NA	NA	NA
cg00472528	0.23259611	0.060255902	3.86013823	0.000113323	0.114	0.351	0.03735502	I	Red	12	124801636	F	rs4765542	NA	NA	NA	chr12:124798796-124799224	S_Shelf
cg00482020	-0.391406625	0.103967268	-3.764710109	0.000166742	-0.595	-0.188	0.041454224	I	Red	16	25026850	R	NA	ARHGAP17;ARHGAP17	NM_018054;NM_001006634	TSS200;TSS200	chr16:25026067-25026538	S_Shore
cg00498612	-0.281358436	0.076625366	-3.671870709	0.000240781	-0.432	-0.131	0.046206445	I	Red	1	185126641	R	NA	C1orf25;C1orf26;C1orf26	NM_030934;NM_017673;NM_001105518	TSS1500;5'UTR;5'UTR	chr1:185125850-185126705	Island
cg00520717	0.332387063	0.091842053	3.619116191	0.000295611	0.152	0.512	0.049188294	I	Grn	19	2751543	F	NA	NA	NA	NA	chr19:2754545-2754938	N_Shelf
cg00524781	0.701380903	0.172741684	4.060287508	4.90E-05	0.363	1.04	0.030280502	I	Red	6	160523923	F	NA	IGF2R	NM_000876	Body	NA	NA
cg00525277	0.241060303	0.061561469	3.915765908	9.01E-05	0.12	0.362	0.035165173	I	Grn	6	32064239	F	rs56250504	TNXB	NM_019105	Body	chr6:32063533-32065044	Island
cg00538370	0.303622025	0.073853565	4.111135672	3.94E-05	0.159	0.448	0.029421726	II	NA	2	8823090	R	NA	ID2	NM_002166	3'UTR	chr2:8821990-8822739	S_Shore
cg00557236	0.485435901	0.124052157	3.913159713	9.11E-05	0.242	0.729	0.035165173	I	Red	5	115782227	F	NA	SEMA6A	NM_020796	3'UTR	chr5:115783075-115783425	N_Shore
cg00570896	-0.336338393	0.085993703	-3.911197926	9.18E-05	-0.505	-0.168	0.035278179	I	Red	1	51443449	F	NA	NA	NA	NA	chr1:51443311-51444036	Island
cg00579379	-0.105698584	0.028827874	-3.666541113	0.000245853	-0.162	-0.049	0.046481088	II	NA	11	111712249	F	NA	ALG9;ALG9;ALG9;ALG9	NM_001077690;NM_001077691;NM_024740;NM_001077692	Body;Body;Body;Body	NA	NA
cg00590251	0.40691751	0.110971117	3.66687766	0.00024553	0.189	0.624	0.046481088	I	Red	2	119980583	R	NA	STEAP3;STEAP3;STEAP3	NM_001008410;NM_018234;NM_182915	TSS1500;TSS1500;TSS1500	chr2:119981079-119981818	N_Shore
cg00595889	0.386007819	0.100173068	3.853409173	0.000116484	0.19	0.582	0.037634396	I	Red	16	951692	R	NA	LMF1	NM_022773	Body	chr16:949658-949960	S_Shore
cg00619561	0.306637891	0.067449673	4.546173165	5.46E-06	0.174	0.439	0.019942532	I	Red	13	112980676	F	rs9577704	NA	NA	NA	NA	NA
cg00620476	0.301320763	0.083535169	3.607112631	0.000309623	0.138	0.465	0.049946066	I	Red	6	31938176	F	rs45534831	STK19;STK19;STK19;DOM3Z	NR_026717;NM_032454;NM_004197;NM_005510	TSS1500;TSS1500;TSS1500;Body	chr6:31939730-31940559	N_Shore
cg00629289	-0.213650644	0.052728021	-4.051937466	5.08E-05	-0.317	-0.11	0.030511754	I	Grn	6	31461728	F	rs2894221	NA	NA	NA	chr6:31461686-31462153	Island
cg00641391	-0.25223604	0.061130292	-4.126203757	3.69E-05	-0.372	-0.132	0.029421726	II	NA	3	197225202	F	rs12330696	NA	NA	NA	chr3:197225631-197226150	N_Shore
cg00655923	0.862139339	0.234903647	3.670182859	0.000242377	0.402	1.323	0.046366149	II	NA	7	64895418	F	rs72284827	NA	NA	NA	NA	NA
cg00666746	1.311216458	0.33655092	3.896041822	9.78E-05	0.652	1.971	0.035774043	II	NA	19	15217781	F	NA	SYDE1	NM_033025	TSS1500	chr19:15217951-15218617	N_Shore
cg00676572	0.300919522	0.078250005	3.845616665	0.00012025	0.148	0.454	0.037921489	II	NA	8	17780336	F	rs17467420	PCM1	NM_006197	TSS200	chr8:17780032-17781272	Island
cg00676969	-0.187402873	0.051520751	-3.6374251	0.000275377	-0.288	-0.086	0.048127772	I	Red	14	74485475	F	rs57482759	ENTPD5;C14orf45	NM_001249;NM_025057	5'UTR;TSS1500	chr14:74485325-74486356	Island
cg00682096	0.478659031	0.114109418	4.194737293	2.73E-05	0.255	0.702	0.027421067	I	Grn	17	46672924	R	NA	LOC404266;LOC404266;LOC404266;LOC404266;LOC404266	NR_033203;NR_033204;NR_033201;NR_033205;NR_033202	Body;Body;Body;TSS1500;Body	chr17:46673532-46674181	N_Shore
cg00705878	-0.223578708	0.059999095	-3.726367982	0.000194259	-0.341	-0.106	0.043408875	I	Grn	3	142720294	F	NA	SR140	NM_001080415	TSS200	chr3:142720236-142720759	Island
cg00711734	-0.228278225	0.062363621	-3.660438903	0.000251784	-0.351	-0.106	0.046675813	I	Red	21	44299692	F	NA	WDR4;WDR4	NM_033661;NM_018669	TSS200;TSS200	chr21:44299111-44299808	Island
cg00712717	0.517563238	0.123234891	4.19981088	2.67E-05	0.276	0.759	0.027220993	II	NA	2	242042233	R	rs11674112	MTERFD2;MTERFD2;MTERFD2;MTERFD2	NM_182501;NR_028049;NR_028050;NR_028051	TSS1500;TSS1500;TSS1500;TSS1500	chr2:242041543-242042026	S_Shore
cg00722180	-0.241002158	0.06356245	-3.791580682	0.000149692	-0.366	-0.116	0.040236886	I	Red	14	73525139	R	NA	RBM25	NM_021239	TSS200	chr14:73524989-73525752	Island
cg00728602	0.649933973	0.168056025	3.867364903	0.000110018	0.321	0.979	0.036965352	II	NA	6	31744927	F	NA	C6orf27;C6orf27	NM_025258;NM_025258	1stExon;5'UTR	NA	NA
cg00783730	-0.587151718	0.155559844	-3.774442699	0.000160366	-0.892	-0.282	0.040859853	I	Grn	6	30689216	R	NA	TUBB	NM_178014	Body	chr6:30688624-30689530	Island
cg00790835	0.534750971	0.14811219	3.610445363	0.000305672	0.244	0.825	0.049660139	II	NA	14	73029443	R	NA	RGS6	NM_004296	3'UTR	NA	NA
cg00804803	0.438881015	0.091215734	4.81146174	1.50E-06	0.26	0.618	0.018650808	I	Red	1	10601595	R	NA	PEX14	NM_004565	Body	NA	NA
cg00812438	-0.334585255	0.090669403	-3.690167201	0.000224107	-0.512	-0.157	0.045113145	I	Red	12	127940086	R	NA	NA	NA	NA	chr12:127940451-127940907	N_Shore
cg00828305	-0.538154073	0.143391167	-3.753048985	0.000174697	-0.819	-0.257	0.042026344	I	Grn	2	178077190	F	NA	HNRNPA3	NM_194247	TSS1500	chr2:178077185-178078215	Island
cg00846248	-0.20474817	0.054335226	-3.768239983	0.000164403	-0.311	-0.098	0.041274702	I	Grn	7	86849067	F	NA	C7orf23	NM_024315	TSS200	chr7:86848911-86850024	Island
cg00851154	-0.760335722	0.207893353	-3.657335409	0.000254851	-1.168	-0.353	0.04678312	I	Red	1	26690578	R	NA	ZNF683;ZNF683	NM_001114759;NM_173574	Body;Body	chr1:26686516-26687281	S_Shelf
cg00852613	-0.187557103	0.044567007	-4.208429455	2.57E-05	-0.275	-0.1	0.026726295	I	Red	13	50159829	F	NA	RCBTB1	NM_018191	TSS200	chr13:50159386-50160106	Island
cg00858015	-0.828550152	0.174044379	-4.760568294	1.93E-06	-1.17	-0.487	0.018745482	I	Red	6	111279703	F	rs71553313	GTF3C6	NM_138408	TSS200	chr6:111279644-111280210	Island
cg00863716	0.585296686	0.148387039	3.944392245	8.00E-05	0.294	0.876	0.03433307	II	NA	10	5061094	F	NA	AKR1C2;AKR1C2	NM_205845;NM_001354	TSS1500;TSS1500	NA	NA
cg00866632	0.734082734	0.201063306	3.651003008	0.000261218	0.34	1.128	0.047204961	II	NA	3	52028763	R	NA	RPL29	NM_000992	Body	chr3:52029757-52030058	N_Shore
cg00878516	0.244933534	0.06282817	3.898466794	9.68E-05	0.122	0.368	0.035664673	I	Red	19	35842853	R	NA	FFAR1	NM_005303	1stExon	chr19:35842430-35843187	Island
cg00894440	0.933811257	0.246137354	3.793862419	0.000148322	0.451	1.416	0.040085681	II	NA	12	125348579	F	NA	SCARB1;SCARB1	NM_005505;NM_001082959	TSS200;TSS200	chr12:125347784-125348688	Island
cg00922857	0.134843892	0.032192518	4.188671786	2.81E-05	0.072	0.198	0.027816265	II	NA	1	77484471	F	rs11162251	ST6GALNAC5	NM_030965	Body	NA	NA
cg00929870	0.396179701	0.099419375	3.984934543	6.75E-05	0.201	0.591	0.032844427	I	Red	10	575954	F	NA	DIP2C	NM_014974	Body	chr10:575898-576131	Island
cg00953443	0.312898371	0.079219336	3.949772706	7.82E-05	0.158	0.468	0.033886467	I	Red	8	141577413	R	NA	EIF2C2;EIF2C2	NM_012154;NM_001164623	Body;Body	NA	NA
cg00956199	-0.300147995	0.078463991	-3.82529603	0.000130615	-0.454	-0.146	0.038667786	I	Grn	10	8078325	F	NA	NA	NA	NA	chr10:8077829-8078378	Island
cg00990212	0.435895541	0.118798516	3.669200207	0.00024331	0.203	0.669	0.046423493	II	NA	12	6641042	R	NA	NCAPD2	NM_014865	3'UTR	chr12:6643261-6644607	N_Shelf
cg00997411	-0.744765623	0.194867777	-3.8219024	0.000132426	-1.127	-0.363	0.038710152	I	Red	1	205290916	R	NA	NUAK2	NM_030952	TSS200	chr1:205290232-205291035	Island
cg01000408	0.796932901	0.201722369	3.950642185	7.79E-05	0.402	1.192	0.033886467	II	NA	19	41106994	R	NA	LTBP4;LTBP4;LTBP4	NM_001042545;NM_001042544;NM_003573	TSS1500;Body;Body	chr19:41107297-41107580	N_Shore
cg01035068	-0.2990638	0.079716859	-3.751575318	0.000175727	-0.455	-0.143	0.042087917	I	Red	16	89627855	F	NA	RPL13;RPL13;SNORD68	NM_000977;NM_033251;NR_002450	Body;Body;Body	chr16:89626644-89627869	Island
cg01040181	-0.791098508	0.185764576	-4.258608	2.06E-05	-1.155	-0.427	0.024843701	I	Red	8	146278358	R	NA	C8orf33	NM_023080	Body	chr8:146277801-146278396	Island
cg01046951	0.348282286	0.094562047	3.683108574	0.000230407	0.163	0.534	0.04545524	I	Red	1	3028877	F	rs11808946	PRDM16;PRDM16	NM_022114;NM_199454	Body;Body	chr1:3028179-3028557	S_Shore
cg01047043	0.733720702	0.199652234	3.674993694	0.000237855	0.342	1.125	0.045912367	II	NA	16	29823197	F	NA	PRRT2	NM_145239	TSS1500	chr16:29823163-29823906	Island
cg01054622	-0.232329818	0.05695087	-4.079477953	4.51E-05	-0.344	-0.121	0.030015649	I	Red	1	21044691	F	NA	KIF17;KIF17	NM_020816;NM_001122819	TSS1500;TSS1500	chr1:21043832-21044771	Island
cg01062116	0.316057627	0.070765788	4.466248978	7.96E-06	0.177	0.455	0.020877178	I	Red	1	3352435	F	rs10909945	PRDM16;PRDM16	NM_199454;NM_022114	3'UTR;3'UTR	chr1:3351365-3351632	S_Shore
cg01068452	-0.51160588	0.136885908	-3.737461994	0.000185887	-0.78	-0.243	0.042744266	I	Red	8	53626947	R	NA	RB1CC1;RB1CC1;RB1CC1;RB1CC1	NM_001083617;NM_001083617;NM_014781;NM_014781	1stExon;5'UTR;5'UTR;1stExon	chr8:53626005-53627501	Island
cg01083884	0.553549863	0.106623829	5.191614941	2.08E-07	0.345	0.763	0.014459783	I	Red	13	113641411	R	NA	MCF2L;MCF2L	NM_001112732;NM_024979	Body;Body	NA	NA
cg01084379	-0.242442896	0.060277966	-4.022081572	5.77E-05	-0.361	-0.124	0.031685944	I	Red	5	179160712	F	rs76897952	MAML1	NM_014757	Body	chr5:179159467-179160534	S_Shore
cg01087419	0.354739476	0.096507324	3.675777783	0.000237126	0.166	0.544	0.045912367	II	NA	12	14959261	R	NA	C12orf69;C12orf60	NM_001013698;NM_175874	Body;5'UTR	chr12:14955991-14956471	S_Shelf
cg01089097	1.021957101	0.255005072	4.007595197	6.13E-05	0.522	1.522	0.032349334	II	NA	15	37110495	F	rs34597888	CSNK1A1P	NR_027320	Body	chr15:37110361-37110778	Island
cg01095004	0.262720144	0.067730595	3.878899121	0.00010493	0.13	0.395	0.036545838	I	Red	16	88454883	R	rs71158730	NA	NA	NA	chr16:88453549-88453969	S_Shore
cg01125531	0.421405243	0.10258643	4.107806876	3.99E-05	0.22	0.622	0.029421726	II	NA	20	62126827	R	NA	EEF1A2	NM_001958	Body	chr20:62127243-62127735	N_Shore
cg01129637	0.535305338	0.145279322	3.684662974	0.000229005	0.251	0.82	0.045363076	I	Grn	11	116692359	F	NA	APOA4	NM_000482	Body	chr11:116691949-116692360	Island
cg01135464	0.140481515	0.034261334	4.100293233	4.13E-05	0.073	0.208	0.029421726	I	Red	17	48971001	F	NA	NA	NA	NA	NA	NA
cg01152726	0.46514027	0.122528341	3.796185177	0.00014694	0.225	0.705	0.039906594	II	NA	18	21452844	R	NA	LAMA3;LAMA3;LAMA3;LAMA3	NM_001127718;NM_000227;NM_198129;NM_001127717	TSS200;TSS200;Body;Body	NA	NA
cg01184387	0.241675607	0.065283676	3.701930115	0.000213966	0.114	0.37	0.044588933	I	Grn	5	176306590	R	NA	UNC5A	NM_133369	Body	chr5:176304965-176305166	S_Shore
cg01186980	0.952894761	0.23177262	4.111334476	3.93E-05	0.499	1.407	0.029421726	I	Red	17	75826713	R	NA	NA	NA	NA	NA	NA
cg01191587	0.2221106	0.055172792	4.025727031	5.68E-05	0.114	0.33	0.031685944	I	Red	13	23345247	F	rs9552708	NA	NA	NA	NA	NA
cg01197864	0.441325291	0.111350251	3.963397351	7.39E-05	0.223	0.66	0.033313339	I	Red	18	8789568	F	rs75914404	KIAA0802	NM_015210	Body	chr18:8785433-8785644	S_Shelf
cg01207176	0.347581464	0.091226176	3.810106688	0.000138907	0.169	0.526	0.039050918	I	Red	22	39887895	F	NA	MGAT3;MGAT3;MGAT3	NM_001098270;NM_002409;NM_001098270	3'UTR;3'UTR;1stExon	chr22:39883515-39885010	S_Shelf
cg01208224	0.65226965	0.179712302	3.629521423	0.000283947	0.3	1.004	0.048713332	II	NA	4	6383645	F	NA	PPP2R2C;PPP2R2C	NM_181876;NM_020416	TSS200;Body	chr4:6380233-6380545	S_Shelf
cg01217204	-0.533747863	0.140337484	-3.803316472	0.000142772	-0.809	-0.259	0.039411825	I	Red	2	113239325	F	NA	TTL	NM_153712	TSS1500	chr2:113239249-113240584	Island
cg01222133	-0.382941433	0.100152579	-3.823580344	0.000131528	-0.579	-0.187	0.038688508	I	Red	16	3086988	R	NA	CCDC64B	NM_001103175	TSS1500	chr16:3085222-3085469	S_Shore
cg01223221	0.59625426	0.15913657	3.746808538	0.000179099	0.284	0.908	0.042326491	I	Red	17	18144934	F	rs1063691	LLGL1	NM_004140	Body	NA	NA
cg01227078	-0.606527831	0.164546204	-3.686063944	0.000227749	-0.929	-0.284	0.045246176	I	Red	5	110074645	F	rs17132319	SLC25A46	NM_138773	TSS200	chr5:110074605-110075223	Island
cg01249735	-0.42594011	0.116655807	-3.651255094	0.000260962	-0.655	-0.197	0.047190745	I	Grn	7	156742241	R	NA	NOM1	NM_138400	TSS200	chr7:156742285-156743074	N_Shore
cg01262337	0.192470323	0.052579049	3.660589647	0.000251635	0.089	0.296	0.046675813	II	NA	3	53290205	F	NA	TKT;TKT;TKT	NM_001135055;NM_001064;NM_001135056	TSS200;TSS200;TSS200	chr3:53289533-53290213	Island
cg01264379	-0.270879799	0.066744624	-4.05845122	4.94E-05	-0.402	-0.14	0.030285203	I	Red	19	47617042	F	NA	ZC3H4	NM_015168	TSS200	chr19:47615253-47617101	Island
cg01289965	-0.186429136	0.051527605	-3.61804391	0.000296838	-0.287	-0.085	0.049188294	I	Red	21	43639928	F	NA	ABCG1;ABCG1;ABCG1;ABCG1;ABCG1;ABCG1	NM_004915;NM_207628;NM_207627;NM_016818;NM_207174;NM_207629	Body;5'UTR;Body;Body;TSS200;Body	chr21:43638948-43640132	Island
cg01320491	0.335503319	0.092652448	3.62109503	0.000293359	0.154	0.517	0.049092143	I	Red	3	47453399	F	NA	PTPN23	NM_015466	Body	NA	NA
cg01326135	0.450890204	0.115312514	3.910158475	9.22E-05	0.225	0.677	0.035372421	II	NA	16	87351364	R	NA	NA	NA	NA	chr16:87350634-87351570	Island
cg01345136	0.362983672	0.096665126	3.755063335	0.000173298	0.174	0.552	0.041926963	II	NA	12	132904123	F	NA	GALNT9	NM_001122636	Body	chr12:132905449-132906206	N_Shore
cg01373262	0.33930874	0.08760388	3.873215864	0.000107409	0.168	0.511	0.036737788	I	Red	20	44034880	R	NA	DBNDD2;DBNDD2;DBNDD2;SYS1-DBNDD2;DBNDD2	NM_001048223;NM_001048222;NM_001048224;NR_003189;NM_001048221	TSS1500;5'UTR;TSS1500;Body;5'UTR	chr20:44034458-44035954	Island
cg01388565	0.398204399	0.100629584	3.957130533	7.59E-05	0.201	0.595	0.033698302	I	Grn	7	134931444	R	NA	STRA8	NM_182489	Body	chr7:134931059-134931510	Island
cg01402068	0.179699101	0.041111955	4.370969533	1.24E-05	0.099	0.26	0.02323787	I	Red	16	930028	F	rs77652500	LMF1	NM_022773	Body	chr16:928142-928380	S_Shore
cg01402448	-0.318323263	0.084325891	-3.7749173	0.000160061	-0.484	-0.153	0.040856004	I	Red	6	136571605	R	NA	FAM54A;FAM54A	NM_001099286;NM_138419	TSS200;TSS200	chr6:136571120-136571814	Island
cg01409693	0.622423002	0.144600246	4.304439444	1.67E-05	0.339	0.906	0.024222597	I	Red	4	1542171	R	NA	NA	NA	NA	chr4:1542408-1542655	N_Shore
cg01417543	-0.390421358	0.10739576	-3.635351713	0.000277602	-0.601	-0.18	0.048411709	I	Red	13	41885657	F	NA	NAA16;NAA16;NAA16;NAA16;NAA16;NAA16	NM_024561;NM_001110798;NM_018527;NM_024561;NM_001110798;NM_018527	5'UTR;5'UTR;1stExon;1stExon;1stExon;5'UTR	chr13:41885251-41886196	Island
cg01424241	0.104462547	0.025157576	4.152329507	3.29E-05	0.055	0.154	0.028922362	II	NA	9	705143	R	NA	KANK1	NM_015158	Body	chr9:707021-707420	N_Shore
cg01429635	1.099849825	0.274566271	4.00577179	6.18E-05	0.562	1.638	0.032399883	II	NA	16	4357936	R	NA	NA	NA	NA	chr16:4357552-4357955	Island
cg01440016	-0.516653101	0.129937759	-3.976158329	7.00E-05	-0.771	-0.262	0.032917763	I	Red	11	111957298	R	NA	TIMM8B;SDHD;TIMM8B	NM_012459;NM_003002;NR_028383	Body;TSS1500;Body	chr11:111957352-111957681	N_Shore
cg01445580	-0.349781458	0.092159304	-3.795400372	0.000147405	-0.53	-0.169	0.039914714	I	Red	1	34631891	F	NA	C1orf94;CSMD2	NM_032884;NM_052896	TSS1500;TSS1500	chr1:34628783-34630976	S_Shore
cg01448863	0.72723865	0.188009632	3.868092511	0.00010969	0.359	1.096	0.036885196	II	NA	14	70264043	R	NA	SLC10A1	NM_003049	TSS200	NA	NA
cg01496720	0.426560512	0.109010532	3.913021098	9.11E-05	0.213	0.64	0.035165173	II	NA	10	3825398	R	NA	KLF6;KLF6;KLF6;KLF6	NR_027653;NM_001160124;NM_001160125;NM_001300	Body;Body;Body;Body	chr10:3826853-3828126	N_Shore
cg01501135	-0.553197047	0.130676972	-4.233317009	2.30E-05	-0.809	-0.297	0.025746424	I	Red	17	16342235	F	NA	NCRNA00188;NCRNA00188;NCRNA00188;NCRNA00188;NCRNA00188;NCRNA00188;NCRNA00188;NCRNA00188;NCRNA00188;SNORD49B;NCRNA00188;NCRNA00188;SNORD49A;NCRNA00188;NCRNA00188;NCRNA00188;NCRNA00188;NCRNA00188;NCRNA00188;NCRNA00188;NCRNA00188;NCRNA00188;NCRNA00188;NCRNA00188;NCRNA00188	NR_027158;NR_027170;NR_027168;NR_027173;NR_027177;NR_027165;NR_027163;NR_027159;NR_027167;NR_003043;NR_027162;NR_027164;NR_002744;NR_027179;NR_027667;NR_027166;NR_027169;NR_027178;NR_027172;NR_027161;NR_027160;NR_027174;NR_027176;NR_027175;NR_027171	TSS200;TSS200;TSS200;TSS200;TSS200;TSS200;TSS200;TSS200;TSS200;TSS1500;TSS200;TSS200;TSS1500;TSS200;TSS200;TSS200;TSS200;TSS200;TSS200;TSS200;TSS200;TSS200;TSS200;TSS200;TSS200	chr17:16342504-16342897	N_Shore
cg01505690	0.538329797	0.148293669	3.630160341	0.000283245	0.248	0.829	0.048696512	I	Grn	19	40411970	R	NA	FCGBP	NM_003890	Body	chr19:40411735-40411941	S_Shore
cg01512155	0.650339096	0.163351675	3.981220864	6.86E-05	0.33	0.971	0.032844427	II	NA	10	49514337	R	NA	NA	NA	NA	chr10:49514331-49515400	Island
cg01519765	-0.3879018	0.090696303	-4.27693069	1.89E-05	-0.566	-0.21	0.024380182	I	Red	3	185828120	R	NA	ETV5	NM_004454	TSS1500	chr3:185825462-185827003	S_Shore
cg01524091	-0.266386254	0.070882939	-3.758115252	0.000171198	-0.405	-0.127	0.041747211	I	Red	6	44281032	F	NA	AARS2	NM_020745	1stExon	chr6:44280719-44281198	Island
cg01532168	-0.237594481	0.059644588	-3.983504404	6.79E-05	-0.354	-0.121	0.032844427	I	Red	8	140715557	F	NA	KCNK9	NM_016601	TSS1500	chr8:140714585-140718259	Island
cg01535733	-0.370878013	0.093121923	-3.982714302	6.81E-05	-0.553	-0.188	0.032844427	I	Red	6	153452320	F	NA	RGS17;RGS17	NM_012419;NM_012419	5'UTR;1stExon	chr6:153450992-153452792	Island
cg01551441	0.651737373	0.154087474	4.229658352	2.34E-05	0.35	0.954	0.025998984	II	NA	5	158477707	R	NA	EBF1	NM_024007	Body	chr5:158478378-158478630	N_Shore
cg01563558	0.594114129	0.155361144	3.824084412	0.000131259	0.29	0.899	0.038688508	I	Red	19	33460691	R	NA	CCDC123	NM_032816	Body	chr19:33462715-33463308	N_Shelf
cg01566283	-0.151612708	0.037505955	-4.042363571	5.29E-05	-0.225	-0.078	0.03109382	I	Red	6	28109239	F	rs9393893	ZNF192	NM_006298	TSS1500	chr6:28109365-28109939	N_Shore
cg01581526	-0.490539981	0.121695419	-4.030882866	5.56E-05	-0.729	-0.252	0.031430285	II	NA	7	100294393	R	NA	NA	NA	NA	chr7:100291183-100292266	S_Shelf
cg01590416	-0.261748242	0.072514197	-3.609613745	0.000306653	-0.404	-0.12	0.049731163	I	Grn	17	16472754	R	NA	ZNF287	NM_020653	TSS1500	chr17:16472074-16472800	Island
cg01601470	0.391832629	0.095377387	4.108234035	3.99E-05	0.205	0.579	0.029421726	I	Red	4	2137389	R	NA	POLN	NM_181808	Body	NA	NA
cg01619509	0.333030917	0.08829372	3.771852813	0.00016204	0.16	0.506	0.041039272	I	Red	12	123476380	R	NA	PITPNM2	NM_020845	Body	NA	NA
cg01622718	0.244542239	0.064491651	3.791843373	0.000149533	0.118	0.371	0.040221701	I	Grn	7	158363414	F	NA	PTPRN2;PTPRN2;PTPRN2	NM_002847;NM_130842;NM_130843	Body;Body;Body	chr7:158361909-158362970	S_Shore
cg01627046	-0.367752019	0.098817299	-3.721534817	0.000198016	-0.561	-0.174	0.043498886	I	Red	12	125473657	F	NA	DHX37;DHX37	NM_032656;NM_032656	1stExon;5'UTR	chr12:125473414-125473824	Island
cg01627823	-0.311091706	0.073350284	-4.241179301	2.22E-05	-0.455	-0.167	0.025581238	I	Red	14	37125531	F	NA	PAX9	NM_006194	TSS1500	chr14:37125219-37125661	Island
cg01633149	0.193082666	0.050356082	3.834346458	0.000125899	0.094	0.292	0.038321768	I	Grn	16	16208885	R	NA	ABCC1;ABCC1;ABCC1;ABCC1;ABCC1	NM_019862;NM_019898;NM_019899;NM_004996;NM_019900	Body;Body;Body;Body;Body	NA	NA
cg01652514	0.598237084	0.156266217	3.828320013	0.000129021	0.292	0.905	0.038626384	II	NA	13	114831142	F	rs75159665	RASA3	NM_007368	Body	NA	NA
cg01660149	-0.331558102	0.087680394	-3.781439449	0.000155924	-0.503	-0.16	0.040519369	I	Red	8	125551313	R	NA	TATDN1;TATDN1;TATDN1;TATDN1;TATDN1;NDUFB9	NM_001146160;NM_001146160;NM_032026;NM_032026;NR_027427;NM_005005	5'UTR;1stExon;5'UTR;1stExon;Body;TSS200	chr8:125551211-125551521	Island
cg01660244	-0.386928305	0.101882397	-3.797793485	0.00014599	-0.587	-0.187	0.039820132	I	Red	6	46620406	R	NA	CYP39A1;CYP39A1;SLC25A27	NM_016593;NM_016593;NM_004277	5'UTR;1stExon;TSS1500	chr6:46620541-46621189	N_Shore
cg01691710	0.845850859	0.209366304	4.040052498	5.34E-05	0.436	1.256	0.031107885	II	NA	8	49292285	R	NA	NA	NA	NA	chr8:49293201-49293547	N_Shore
cg01699740	0.357608161	0.093976167	3.80530694	0.000141628	0.173	0.542	0.039368142	I	Red	11	123396486	F	NA	GRAMD1B	NM_020716	TSS200	NA	NA
cg01721835	0.381881409	0.102882172	3.711832672	0.000205764	0.18	0.584	0.044165261	II	NA	1	55933546	F	NA	NA	NA	NA	NA	NA
cg01742680	-0.489438443	0.134355982	-3.642848172	0.000269638	-0.753	-0.226	0.04783063	I	Grn	3	152879841	F	NA	RAP2B	NM_002886	TSS200	chr3:152878268-152881086	Island
cg01761420	-0.460486878	0.126788943	-3.63191668	0.000281324	-0.709	-0.212	0.048642645	I	Red	6	106534239	R	NA	PRDM1;PRDM1	NM_001198;NM_001198	5'UTR;1stExon	chr6:106534136-106534385	Island
cg01762921	0.707080095	0.195284562	3.620768009	0.00029373	0.324	1.09	0.049092143	II	NA	1	6673618	F	NA	PHF13	NM_153812	TSS200	chr1:6672786-6675741	Island
cg01766065	-0.259113529	0.065250979	-3.971028978	7.16E-05	-0.387	-0.131	0.033120607	I	Red	11	35161183	F	NA	CD44;CD44;CD44;CD44;CD44	NM_001001389;NM_001001392;NM_000610;NM_001001390;NM_001001391	Body;Body;Body;Body;Body	chr11:35160375-35161000	S_Shore
cg01772422	0.346887117	0.081351199	4.264068889	2.01E-05	0.187	0.506	0.024642275	I	Red	17	81021456	R	NA	NA	NA	NA	chr17:81024122-81024360	N_Shelf
cg01773858	0.40070566	0.081541923	4.914106104	8.92E-07	0.241	0.561	0.017320823	I	Red	11	73076892	F	NA	ARHGEF17	NM_014786	Body	chr11:73073118-73073733	S_Shelf
cg01787821	0.173690993	0.045525383	3.815256053	0.000136042	0.084	0.263	0.038960227	I	Grn	3	10400481	F	rs56056138	ATP2B2;ATP2B2	NM_001683;NM_001001331	Body;Body	chr3:10400381-10400586	Island
cg01807886	-0.273491996	0.069355572	-3.943331297	8.04E-05	-0.409	-0.138	0.034343788	I	Grn	1	201438283	F	NA	PHLDA3;PHLDA3	NM_012396;NM_012396	1stExon;5'UTR	chr1:201437519-201438648	Island
cg01808433	-0.517097068	0.135163681	-3.825710172	0.000130396	-0.782	-0.252	0.038626384	I	Red	6	138724723	R	NA	HEBP2	NM_014320	TSS1500	chr6:138724617-138726215	Island
cg01812070	0.543690792	0.144003525	3.775538083	0.000159663	0.261	0.826	0.040835508	II	NA	2	71016724	R	NA	FIGLA	NM_001004311	Body	chr2:71017028-71017976	N_Shore
cg01812826	-0.48206475	0.126693175	-3.804978056	0.000141817	-0.73	-0.234	0.039368142	I	Red	8	123793836	R	NA	ZHX2	NM_014943	TSS200	chr8:123792369-123794942	Island
cg01826337	0.846537512	0.183573506	4.611436198	4.00E-06	0.487	1.206	0.019595269	I	Red	1	1846001	F	NA	CALML6	NM_138705	TSS1500	NA	NA
cg01828733	0.784488621	0.205701938	3.813715271	0.000136893	0.381	1.188	0.038960227	II	NA	1	201708932	F	NA	NAV1;NAV1	NM_001167738;NM_020443	TSS200;Body	chr1:201708787-201709429	Island
cg01830002	0.686500731	0.175881305	3.903204675	9.49E-05	0.342	1.031	0.035587932	II	NA	1	201032807	F	NA	CACNA1S	NM_000069	Body	NA	NA
cg01832569	-0.417881596	0.111501976	-3.74775059	0.000178428	-0.636	-0.199	0.04227347	I	Red	1	171711313	R	rs12562098	VAMP4	NM_003762	TSS200	chr1:171710845-171711607	Island
cg01850464	-0.494291493	0.1197272	-4.128481199	3.65E-05	-0.729	-0.26	0.029421726	I	Grn	12	32552279	F	NA	NA	NA	NA	chr12:32552025-32553038	Island
cg01851230	-0.173058153	0.045800335	-3.778534644	0.000157754	-0.263	-0.083	0.040675208	I	Red	15	41523064	F	rs28372765	CHP;EXD1	NM_007236;NM_152596	TSS1500;TSS200	chr15:41522828-41523732	Island
cg01876812	0.445170119	0.113547386	3.92056688	8.83E-05	0.223	0.668	0.034898758	II	NA	1	98962898	R	NA	NA	NA	NA	NA	NA
cg01898377	0.210497531	0.053661542	3.922688809	8.76E-05	0.105	0.316	0.034883186	I	Red	20	48960272	R	NA	NA	NA	NA	chr20:48960164-48960373	Island
cg01905589	-0.959997237	0.246968815	-3.887119264	0.000101441	-1.444	-0.476	0.036239117	I	Grn	1	26856408	F	NA	RPS6KA1;RPS6KA1	NM_002953;NM_002953	1stExon;5'UTR	chr1:26856191-26856684	Island
cg01908177	0.300913167	0.082140167	3.663410718	0.000248879	0.14	0.462	0.046590992	I	Red	3	113005203	F	NA	BOC	NM_033254	Body	NA	NA
cg01913632	-0.252198861	0.064610025	-3.903401363	9.49E-05	-0.379	-0.126	0.035587932	I	Grn	3	9004943	F	rs36047100	RAD18	NM_020165	Body	chr3:9004864-9005270	Island
cg01915951	-0.588790497	0.162535109	-3.62254347	0.00029172	-0.907	-0.27	0.049062216	I	Grn	20	62130500	R	NA	EEF1A2;EEF1A2	NM_001958;NM_001958	1stExon;5'UTR	chr20:62127243-62127735	S_Shelf
cg01923523	-0.567750169	0.13532917	-4.195327366	2.72E-05	-0.833	-0.303	0.027421067	I	Red	1	3712654	R	NA	LRRC47	NM_020710	1stExon	chr1:3712398-3713234	Island
cg01928910	0.193359971	0.052511396	3.682247754	0.000231187	0.09	0.296	0.045538108	I	Red	1	31194314	R	NA	MATN1	NM_002379	Body	chr1:31194276-31194587	Island
cg01935096	0.427459404	0.115008679	3.716757776	0.000201796	0.202	0.653	0.043821229	I	Grn	11	70391215	F	rs7110358	SHANK2;SHANK2	NM_012309;NM_133266	Body;Body	NA	NA
cg01936319	-0.450033394	0.103636983	-4.342401543	1.41E-05	-0.653	-0.247	0.024222597	I	Red	15	41523707	R	NA	CHP;EXD1	NM_007236;NM_152596	Body;TSS1500	chr15:41522828-41523732	Island
cg01940855	-0.774470116	0.177830048	-4.355113914	1.33E-05	-1.123	-0.426	0.024066847	I	Red	12	104852355	R	NA	CHST11	NM_018413	Body	chr12:104850253-104852395	Island
cg01948217	0.180240783	0.039591648	4.552495076	5.30E-06	0.103	0.258	0.019813456	II	NA	20	36932385	F	rs5743496	BPI	NM_001725	TSS200	NA	NA
cg01949614	-0.326076882	0.087385183	-3.731489385	0.000190351	-0.497	-0.155	0.043105275	I	Red	16	1359397	R	NA	UBE2I;UBE2I;UBE2I;UBE2I;UBE2I	NM_194260;NM_194259;NM_194260;NM_194261;NM_003345	5'UTR;TSS1500;1stExon;5'UTR;TSS1500	chr16:1358729-1360232	Island
cg01953658	-0.389980047	0.093815933	-4.15686372	3.23E-05	-0.574	-0.206	0.028742874	I	Red	15	96904404	F	NA	NA	NA	NA	chr15:96904722-96905050	N_Shore
cg01957751	0.296391154	0.078961318	3.753624697	0.000174296	0.142	0.451	0.041975538	I	Grn	8	143361586	R	NA	TSNARE1	NM_145003	Body	chr8:143361313-143361642	Island
cg01975877	0.381070315	0.085719361	4.445557122	8.77E-06	0.213	0.549	0.020877178	I	Red	1	9324232	F	NA	H6PD	NM_004285	Body	chr1:9324202-9324439	Island
cg01977863	0.356851123	0.098001719	3.641274106	0.000271292	0.165	0.549	0.047879161	I	Red	17	79167836	F	NA	AZI1;AZI1	NM_014984;NM_001009811	Body;Body	chr17:79164388-79165184	S_Shelf
cg01980454	-0.212288185	0.057107145	-3.717366472	0.00020131	-0.324	-0.1	0.043781737	I	Red	1	859173	R	NA	NA	NA	NA	chr1:858970-861632	Island
cg01992424	-0.188787839	0.051541916	-3.662802111	0.000249471	-0.29	-0.088	0.046590992	I	Red	14	75593964	R	NA	NEK9	NM_033116	TSS200	chr14:75593293-75594011	Island
cg02011054	-0.485605144	0.131063831	-3.705104159	0.000211304	-0.742	-0.229	0.044544406	I	Grn	11	2950754	F	NA	PHLDA2	NM_003311	TSS200	chr11:2949788-2951756	Island
cg02041137	-0.363725597	0.098851799	-3.679504068	0.000233688	-0.557	-0.17	0.045712454	I	Red	17	3571890	F	NA	TMEM93;TAX1BP3;TAX1BP3;TMEM93	NM_001014764;NM_014604;NM_014604;NM_031298	TSS200;5'UTR;1stExon;TSS200	chr17:3571224-3572618	Island
cg02041805	0.368824512	0.087056342	4.236618538	2.27E-05	0.198	0.539	0.025746424	I	Red	16	1331547	F	NA	NA	NA	NA	NA	NA
cg02046226	0.386391007	0.089630255	4.310943977	1.63E-05	0.211	0.562	0.024222597	II	NA	10	121410475	F	NA	BAG3	NM_004281	TSS1500	chr10:121410566-121411827	N_Shore
cg02059348	-0.44748298	0.109051428	-4.103412376	4.07E-05	-0.661	-0.234	0.029421726	I	Grn	3	150803295	R	NA	MED12L	NM_053002	TSS1500	chr3:150802996-150805168	Island
cg02060732	0.357933837	0.083107224	4.306891962	1.66E-05	0.195	0.521	0.024222597	I	Red	17	77151206	F	NA	HRNBP3	NM_001082575	5'UTR	NA	NA
cg02070114	-0.758487737	0.184340695	-4.114597359	3.88E-05	-1.12	-0.397	0.029421726	I	Red	5	139555300	R	NA	C5orf32	NM_032412	5'UTR	chr5:139554389-139555457	Island
cg02082843	0.599046348	0.16018794	3.739647001	0.000184279	0.285	0.913	0.042622298	II	NA	14	92339595	R	NA	FBLN5	NM_006329	Body	NA	NA
cg02084811	-0.588062205	0.141305514	-4.161636652	3.16E-05	-0.865	-0.311	0.02852778	I	Grn	12	49524778	R	NA	TUBA1B	NM_006082	Body	chr12:49524072-49525492	Island
cg02100674	-0.299563989	0.076803777	-3.900380939	9.60E-05	-0.45	-0.149	0.035664673	I	Red	10	83636325	F	NA	NRG3;NRG3;NRG3	NM_001165972;NM_001010848;NM_001165973	Body;Body;TSS1500	chr10:83633820-83635729	S_Shore
cg02104993	-0.383158539	0.099610465	-3.84656911	0.000119783	-0.578	-0.188	0.037921489	I	Red	17	52978209	F	rs79320845	TOM1L1;TOM1L1	NM_005486;NM_005486	1stExon;5'UTR	chr17:52977866-52978307	Island
cg02109189	0.163216962	0.042888898	3.805576032	0.000141475	0.079	0.247	0.039368142	I	Red	13	112611279	R	NA	NA	NA	NA	chr13:112610658-112611433	Island
cg02119938	0.270088788	0.073836496	3.657930718	0.00025426	0.125	0.415	0.04678312	I	Red	15	78505051	F	NA	ACSBG1	NM_015162	Body	NA	NA
cg02123667	-0.336742658	0.091241902	-3.69065802	0.000223675	-0.516	-0.158	0.045113145	I	Red	8	127570702	F	NA	FAM84B	NM_174911	TSS1500	chr8:127568676-127570873	Island
cg02144924	0.279208926	0.065314193	4.274858391	1.91E-05	0.151	0.407	0.024380182	I	Red	22	45244265	F	NA	ARHGAP8;PRR5-ARHGAP8;ARHGAP8	NM_181335;NM_181334;NM_001017526	Body;Body;Body	NA	NA
cg02151485	0.355164985	0.098455715	3.607357736	0.000309331	0.162	0.548	0.049946066	I	Red	2	238820445	R	NA	RAMP1	NM_005855	3'UTR	NA	NA
cg02155048	0.401282738	0.102861644	3.901189231	9.57E-05	0.2	0.603	0.035655975	I	Grn	16	10721597	R	NA	TEKT5	NM_144674	Body	chr16:10721407-10721647	Island
cg02208820	0.149763144	0.040556498	3.692704004	0.000221882	0.07	0.229	0.045061793	I	Red	10	577713	F	NA	DIP2C	NM_014974	Body	chr10:575898-576131	S_Shore
cg02216731	0.200847974	0.055355686	3.628316931	0.000285275	0.092	0.309	0.048713332	I	Grn	16	801936	R	NA	NA	NA	NA	chr16:798171-798510	S_Shelf
cg02236554	0.301887301	0.081538347	3.702396622	0.000213572	0.142	0.462	0.044588933	I	Red	2	2672718	R	NA	NA	NA	NA	NA	NA
cg02239082	-0.511923353	0.13626111	-3.75692928	0.000172011	-0.779	-0.245	0.041861375	I	Grn	19	48972844	R	NA	CYTH2;CYTH2	NM_004228;NM_017457	Body;Body	chr19:48972225-48973157	Island
cg02252795	0.651385453	0.169470806	3.843644042	0.000121221	0.319	0.984	0.037921489	I	Grn	16	85877243	R	NA	NA	NA	NA	chr16:85878939-85879146	N_Shore
cg02263999	-0.519753583	0.137370571	-3.78358757	0.000154584	-0.789	-0.251	0.040478954	I	Red	15	66994432	R	NA	SMAD6;SMAD6	NR_027654;NM_005585	TSS1500;TSS1500	chr15:66993543-66996571	Island
cg02277511	-0.196482544	0.05217531	-3.765814616	0.000166007	-0.299	-0.094	0.041380716	I	Red	5	174905420	R	NA	SFXN1	NM_022754	TSS200	chr5:174905342-174906065	Island
cg02290803	-0.510693515	0.125054128	-4.083779748	4.43E-05	-0.756	-0.266	0.029953167	I	Grn	1	40997356	R	NA	ZNF684;ZNF684	NM_152373;NM_152373	5'UTR;1stExon	chr1:40997160-40997439	Island
cg02302400	-0.401198167	0.105688999	-3.796025817	0.000147034	-0.608	-0.194	0.039906594	I	Red	8	56987044	R	NA	SNORD54;RPS20;RPS20;RPS20;RPS20	NR_002437;NM_001146227;NM_001023;NM_001023;NM_001146227	TSS1500;5'UTR;1stExon;5'UTR;1stExon	chr8:56986556-56987308	Island
cg02308712	-0.42053713	0.107279424	-3.920016667	8.85E-05	-0.631	-0.21	0.034921701	II	NA	12	52598204	R	NA	NA	NA	NA	NA	NA
cg02317072	0.614884908	0.166161616	3.700523154	0.000215155	0.289	0.941	0.044708499	I	Red	16	89652875	R	NA	CPNE7;CPNE7	NM_014427;NM_153636	Body;Body	chr16:89654041-89654692	N_Shore
cg02322048	0.290734189	0.079806236	3.643000895	0.000269478	0.134	0.447	0.04781972	I	Grn	19	3646574	F	NA	PIP5K1C	NM_012398	Body	chr19:3648526-3648766	N_Shore
cg02330121	-0.265619739	0.071093556	-3.736199901	0.000186822	-0.405	-0.126	0.042787476	I	Red	6	118228514	F	rs2788996	SLC35F1	NM_001029858	TSS200	chr6:118228042-118229811	Island
cg02335971	-0.223666909	0.060360283	-3.705531116	0.000210948	-0.342	-0.105	0.044510168	I	Red	8	121457381	F	NA	MTBP;MRPL13;MRPL13	NM_022045;NM_014078;NM_014078	TSS1500;1stExon;5'UTR	chr8:121457353-121457657	Island
cg02352107	-0.656857723	0.161459643	-4.068247101	4.74E-05	-0.973	-0.34	0.030242045	I	Red	15	76603736	F	NA	ETFA;ETFA;ETFA;ETFA	NM_000126;NM_001127716;NM_001127716;NM_000126	5'UTR;1stExon;5'UTR;1stExon	chr15:76603563-76604026	Island
cg02361493	0.305879268	0.070814671	4.319433554	1.56E-05	0.167	0.445	0.024222597	I	Grn	12	131164500	R	NA	NA	NA	NA	NA	NA
cg02368356	0.476251663	0.122862373	3.876302011	0.000106056	0.235	0.717	0.036634949	I	Grn	5	14498601	F	NA	TRIO	NM_007118	Body	NA	NA
cg02370953	0.320426675	0.084083557	3.810812553	0.000138511	0.156	0.485	0.038987826	I	Grn	16	16184299	R	NA	ABCC1;ABCC1;ABCC1;ABCC1;ABCC1	NM_019862;NM_019898;NM_019899;NM_004996;NM_019900	Body;Body;Body;Body;Body	NA	NA
cg02383285	0.494496807	0.129996669	3.803919059	0.000142425	0.24	0.749	0.039378655	II	NA	6	169286348	R	NA	NA	NA	NA	chr6:169286195-169286688	Island
cg02383651	0.229028789	0.057757594	3.965345063	7.33E-05	0.116	0.342	0.033255233	I	Red	4	183778463	R	NA	NA	NA	NA	NA	NA
cg02389323	0.28561736	0.076814238	3.718286701	0.000200579	0.135	0.436	0.043708839	I	Grn	16	88786976	R	NA	FAM38A	NM_001142864	Body	chr16:88787564-88787782	N_Shore
cg02394698	-0.500240833	0.104421843	-4.790576562	1.66E-06	-0.705	-0.296	0.018650808	II	NA	4	86594376	R	NA	ARHGAP24	NM_001025616	Body	NA	NA
cg02396040	-0.558290088	0.150793994	-3.70233638	0.000213623	-0.854	-0.263	0.044588933	I	Grn	6	88117726	F	rs7759848	C6orf165;C6orf165;C6orf165	NM_001031743;NM_001031743;NM_178823	5'UTR;1stExon;TSS200	chr6:88117707-88118363	Island
cg02399900	0.519052853	0.14019999	3.702231726	0.000213711	0.244	0.794	0.044588933	I	Red	10	126305320	F	rs72842352	NA	NA	NA	chr10:126303794-126304213	S_Shore
cg02418452	-0.185459435	0.049448992	-3.750520024	0.000176468	-0.282	-0.089	0.042087917	I	Red	12	110338256	R	NA	TCHP;TCHP	NM_001143852;NM_032300	5'UTR;TSS200	chr12:110337980-110338591	Island
cg02422616	0.7869348	0.170731404	4.609197726	4.04E-06	0.452	1.122	0.019595269	I	Red	7	158713075	F	NA	WDR60	NM_018051	Body	chr7:158712559-158713094	Island
cg02423323	-0.200084507	0.044249784	-4.521705887	6.13E-06	-0.287	-0.113	0.020026345	II	NA	4	146100633	F	NA	OTUD4;OTUD4;OTUD4	NM_017493;NM_199324;NM_001102653	5'UTR;5'UTR;5'UTR	chr4:146100754-146102055	N_Shore
cg02425263	-0.569969753	0.14067509	-4.051675067	5.09E-05	-0.846	-0.294	0.030511754	I	Red	7	1265197	F	NA	NA	NA	NA	chr7:1265111-1265379	Island
cg02453779	-0.284422472	0.074564689	-3.814439172	0.000136493	-0.431	-0.138	0.038960227	I	Red	11	105948520	R	NA	AASDHPPT;KBTBD3;KBTBD3	NM_015423;NM_198439;NM_152433	1stExon;TSS200;TSS200	chr11:105948097-105948830	Island
cg02457346	0.728829808	0.188777893	3.860779448	0.000113026	0.359	1.099	0.03735502	I	Red	16	1825936	R	NA	EME2	NM_001010865	Body	chr16:1827104-1827405	N_Shore
cg02464979	0.232038629	0.055420211	4.186895424	2.83E-05	0.123	0.341	0.027816265	I	Grn	10	3313279	F	rs74113104	NA	NA	NA	NA	NA
cg02467602	0.617414291	0.154031041	4.008375765	6.11E-05	0.316	0.919	0.032349334	II	NA	8	49307089	F	NA	NA	NA	NA	chr8:49309063-49309633	N_Shore
cg02468154	0.721577282	0.184335045	3.914487782	9.06E-05	0.36	1.083	0.035165173	II	NA	11	43755634	F	NA	HSD17B12	NM_016142	Body	NA	NA
cg02470923	0.331739191	0.077218258	4.296123759	1.74E-05	0.18	0.483	0.024222597	I	Grn	13	22392755	F	NA	NA	NA	NA	NA	NA
cg02484335	0.35229988	0.084856887	4.151694576	3.30E-05	0.186	0.519	0.028922362	I	Red	16	84623830	R	NA	COTL1	NM_021149	Body	NA	NA
cg02514519	-0.586856265	0.16192268	-3.624299346	0.000289746	-0.904	-0.269	0.04899929	I	Red	11	61348922	F	NA	SYT7	NM_004200	TSS1500	chr11:61347808-61349038	Island
cg02514855	-0.277884648	0.066750114	-4.163058784	3.14E-05	-0.409	-0.147	0.028496604	I	Red	8	100905969	F	rs78237060	COX6C	NM_004374	TSS200	chr8:100905657-100906003	Island
cg02530705	-0.40710581	0.110221937	-3.693509837	0.00022118	-0.623	-0.191	0.045006505	I	Grn	16	2518497	R	NA	NA	NA	NA	chr16:2517607-2518610	Island
cg02533120	-0.55381051	0.141482499	-3.914339332	9.07E-05	-0.831	-0.277	0.035165173	I	Grn	21	33031840	F	NA	SOD1	NM_000454	TSS200	chr21:33031734-33032657	Island
cg02543202	-0.650099708	0.137156804	-4.739828355	2.14E-06	-0.919	-0.381	0.018881945	I	Red	2	120516858	F	NA	PTPN4	NM_002830	TSS1500	chr2:120517066-120518010	N_Shore
cg02563349	0.222011276	0.053022177	4.18713995	2.82E-05	0.118	0.326	0.027816265	I	Grn	12	130502049	R	NA	NA	NA	NA	NA	NA
cg02568153	0.56069453	0.141002711	3.976480504	6.99E-05	0.284	0.837	0.032909116	I	Red	7	2184201	F	NA	MAD1L1;MAD1L1;MAD1L1	NM_003550;NM_001013837;NM_001013836	Body;Body;Body	chr7:2185771-2186205	N_Shore
cg02573276	-0.308850214	0.084567173	-3.652128887	0.000260075	-0.475	-0.143	0.047124429	I	Red	1	2344586	F	NA	PEX10;PEX10	NM_002617;NM_153818	TSS1500;TSS1500	chr1:2343385-2344717	Island
cg02600551	1.080480973	0.279042032	3.87210832	0.000107898	0.534	1.627	0.036737788	II	NA	19	2950360	R	NA	NA	NA	NA	chr19:2950359-2950962	Island
cg02601318	-0.374775128	0.090394012	-4.146017184	3.38E-05	-0.552	-0.198	0.029122839	I	Red	6	30882384	F	rs3218830	VARS2;VARS2;VARS2	NM_001167733;NM_020442;NM_001167734	5'UTR;5'UTR;Body	chr6:30881533-30882296	S_Shore
cg02602423	0.32166263	0.085395516	3.766739127	0.000165394	0.154	0.489	0.04130582	I	Red	7	105255065	F	NA	ATXN7L1;ATXN7L1	NM_020725;NM_138495	Body;Body	NA	NA
cg02604995	-0.254708995	0.068781894	-3.703140172	0.000212947	-0.39	-0.12	0.044588933	II	NA	16	88050370	R	NA	BANP;BANP	NM_017869;NM_079837	Body;Body	chr16:88052061-88052392	N_Shore
cg02610064	0.422192233	0.1045949	4.036451435	5.43E-05	0.217	0.627	0.031119651	I	Red	11	67179310	F	rs34597977	NA	NA	NA	chr11:67182965-67183393	N_Shelf
cg02620388	-0.394298482	0.101794183	-3.87348736	0.000107289	-0.594	-0.195	0.036737788	I	Red	7	100271115	R	NA	GNB2	NM_005273	TSS1500	chr7:100270875-100274003	Island
cg02627599	0.303393159	0.079600753	3.811435775	0.000138162	0.147	0.459	0.038987826	I	Grn	6	148880600	F	rs208730	NA	NA	NA	chr6:148881016-148881441	N_Shore
cg02630233	0.349991164	0.096718575	3.618655082	0.000296138	0.16	0.54	0.049188294	I	Red	16	88482273	R	NA	NA	NA	NA	NA	NA
cg02672452	0.8810516	0.238968752	3.686890418	0.000227011	0.413	1.349	0.04522634	II	NA	2	91818189	R	NA	NA	NA	NA	NA	NA
cg02673453	0.199317607	0.055053579	3.620429589	0.000294114	0.091	0.307	0.049092143	I	Red	16	15814806	R	NA	MYH11;MYH11;NDE1;NDE1;MYH11;MYH11	NM_022844;NM_002474;NM_017668;NM_001143979;NM_001040114;NM_001040113	Body;Body;Body;Body;Body;Body	NA	NA
cg02684603	-0.235875684	0.05979704	-3.944604671	7.99E-05	-0.353	-0.119	0.03433307	I	Red	4	89445054	R	NA	PIGY;PIGY	NM_001042616;NM_032906	TSS200;TSS200	chr4:89444407-89445055	Island
cg02687417	0.61367908	0.161321875	3.80406613	0.00014234	0.297	0.93	0.039377694	II	NA	20	43977232	F	rs1005284	SDC4	NM_002999	TSS200	chr20:43976533-43977242	Island
cg02699671	0.15656122	0.041813194	3.744301897	0.000180896	0.075	0.239	0.042427165	I	Grn	17	850251	F	NA	NXN	NM_022463	Body	chr17:850207-850500	Island
cg02706649	0.382198799	0.105023741	3.639165742	0.000273523	0.176	0.588	0.047959033	II	NA	1	249200612	R	NA	PGBD2;PGBD2	NM_170725;NM_001017434	5'UTR;5'UTR	chr1:249200252-249200721	Island
cg02730322	0.402379379	0.106897457	3.764162326	0.000167108	0.193	0.612	0.041454224	II	NA	20	43150917	F	NA	SERINC3;SERINC3	NM_198941;NM_006811	TSS200;TSS200	chr20:43150299-43150779	S_Shore
cg02730714	0.277410993	0.06949671	3.991714044	6.56E-05	0.141	0.414	0.032754148	I	Red	16	69143775	R	NA	HAS3;HAS3	NM_005329;NM_138612	Body;Body	chr16:69143499-69143919	Island
cg02759751	0.319583981	0.085262822	3.748221946	0.000178093	0.152	0.487	0.04227347	I	Red	7	1491889	R	NA	MICALL2	NM_182924	Body	chr7:1491773-1491975	Island
cg02782369	-0.296723108	0.079666795	-3.724551858	0.000195662	-0.453	-0.141	0.043426453	I	Red	19	14583279	F	NA	PTGER1	NM_000955	3'UTR	chr19:14582419-14585098	Island
cg02783477	0.950398129	0.246405666	3.857046569	0.000114765	0.467	1.433	0.037485912	II	NA	15	52821013	R	NA	MYO5A;MYO5A;MYO5A;MYO5A	NM_001142495;NM_000259;NM_000259;NM_001142495	5'UTR;5'UTR;1stExon;1stExon	chr15:52820333-52821639	Island
cg02791145	0.327589086	0.084652083	3.869829014	0.000108912	0.162	0.494	0.036807378	II	NA	11	50220426	F	rs80063275	NA	NA	NA	NA	NA
cg02800396	0.309211895	0.077966442	3.965961343	7.31E-05	0.156	0.462	0.033206221	I	Grn	11	64532971	R	NA	SF1;SF1;SF1	NM_201995;NM_004630;NM_201998	Body;3'UTR;Body	chr11:64532936-64533763	Island
cg02805052	0.462484038	0.099438648	4.650948579	3.30E-06	0.268	0.657	0.019595269	II	NA	2	104973361	R	NA	NA	NA	NA	NA	NA
cg02806675	0.20852694	0.052153891	3.99830075	6.38E-05	0.106	0.311	0.032587381	II	NA	3	59627287	R	NA	NA	NA	NA	NA	NA
cg02848996	0.209689611	0.057737695	3.631762752	0.000281492	0.097	0.323	0.048642645	I	Red	10	1209463	F	rs11593848	NCRNA00200	NR_015376	Body	chr10:1209314-1209521	Island
cg02853107	0.285196145	0.062559685	4.55878483	5.15E-06	0.163	0.408	0.019595269	I	Red	4	41984968	R	NA	DCAF4L1	NM_001029955	1stExon	chr4:41983922-41984183	S_Shore
cg02856727	0.529484726	0.130292137	4.063827181	4.83E-05	0.274	0.785	0.030242045	II	NA	17	61959416	F	NA	GH2;GH2;GH2;GH2	NM_022556;NM_002059;NM_022558;NM_022557	TSS200;TSS200;TSS200;TSS200	NA	NA
cg02873427	0.549289785	0.151628868	3.622593731	0.000291664	0.252	0.846	0.049062216	II	NA	8	145514720	R	NA	BOP1;HSF1	NM_015201;NM_005526	Body;TSS1500	chr8:145514719-145515959	Island
cg02884346	-0.313936181	0.081112466	-3.870381415	0.000108665	-0.473	-0.155	0.036807378	I	Red	4	6271501	R	NA	WFS1;WFS1	NM_006005;NM_001145853	TSS200;TSS200	chr4:6271280-6272182	Island
cg02902800	-0.254136534	0.066820719	-3.803259477	0.000142805	-0.385	-0.123	0.039411825	I	Red	4	6784175	F	NA	KIAA0232;KIAA0232	NM_014743;NM_001100590	TSS1500;TSS1500	chr4:6783872-6785283	Island
cg02908720	-0.426612982	0.107865688	-3.955038824	7.65E-05	-0.638	-0.215	0.033774962	I	Red	7	127292155	R	NA	SND1	NM_014390	TSS200	chr7:127291647-127292551	Island
cg02921627	0.317251134	0.080878819	3.922549052	8.76E-05	0.159	0.476	0.034883186	I	Grn	8	144589984	F	NA	ZC3H3	NM_015117	Body	NA	NA
cg02939767	0.288923673	0.065945301	4.381262492	1.18E-05	0.16	0.418	0.022914927	I	Grn	20	584773	R	NA	TCF15	NM_004609	3'UTR	NA	NA
cg02947276	0.255755212	0.067408705	3.794097704	0.000148181	0.124	0.388	0.040085681	I	Red	14	24731242	F	rs41295340	TGM1	NM_000359	Body	NA	NA
cg02948236	-0.412999035	0.114512699	-3.606578479	0.000310261	-0.637	-0.189	0.049990821	I	Red	16	66864732	F	NA	NAE1;NAE1;NAE1	NM_001018159;NM_003905;NM_001018160	5'UTR;Body;5'UTR	chr16:66864407-66864991	Island
cg02957340	-0.338049999	0.083180135	-4.064071296	4.82E-05	-0.501	-0.175	0.030242045	I	Red	14	100070899	F	NA	CCDC85C	NM_001144995	TSS200	chr14:100069475-100071813	Island
cg02960249	-0.240066763	0.060268492	-3.983288008	6.80E-05	-0.358	-0.122	0.032844427	I	Red	6	131384664	R	NA	EPB41L2;EPB41L2;EPB41L2	NM_001135555;NM_001431;NM_001135554	TSS1500;TSS1500;TSS1500	chr6:131383431-131384371	S_Shore
cg02988376	-0.248700674	0.05588152	-4.450499481	8.57E-06	-0.358	-0.139	0.020877178	I	Red	8	103875515	F	NA	AZIN1;AZIN1	NM_015878;NM_148174	5'UTR;5'UTR	chr8:103875222-103877084	Island
cg02997735	0.579090492	0.148197243	3.907565901	9.32E-05	0.289	0.87	0.0355295	I	Grn	19	44096738	R	NA	IRGQ	NM_001007561	Body	chr19:44096223-44097508	Island
cg03018369	0.199948791	0.049529066	4.036999013	5.41E-05	0.103	0.297	0.031107885	I	Grn	11	71187445	R	NA	NADSYN1	NM_018161	Body	NA	NA
cg03022575	0.75919061	0.170124388	4.46256189	8.10E-06	0.426	1.093	0.020877178	II	NA	3	42003672	F	rs73830585	ULK4	NM_017886	TSS200	chr3:42002932-42003728	Island
cg03030650	0.18365166	0.041572078	4.417668478	9.98E-06	0.102	0.265	0.0214337	I	Red	2	220317372	R	NA	SPEG	NM_005876	Body	chr2:220312698-220314094	S_Shelf
cg03040848	0.347170974	0.095790768	3.624263387	0.000289786	0.159	0.535	0.04899929	I	Red	16	88993053	R	NA	CBFA2T3;CBFA2T3	NM_175931;NM_005187	5'UTR;Body	chr16:88994137-88994442	N_Shore
cg03045764	0.298919961	0.081297223	3.676877868	0.000236106	0.14	0.458	0.04590801	I	Red	14	67940035	R	NA	TMEM229B	NM_182526	3'UTR	chr14:67940174-67940670	N_Shore
cg03046325	-0.641945699	0.176236941	-3.642514991	0.000269987	-0.987	-0.297	0.047837573	I	Grn	10	93558661	F	NA	TNKS2	NM_025235	Body	chr10:93557970-93558699	Island
cg03062587	0.446619158	0.113667766	3.929162789	8.52E-05	0.224	0.669	0.034883186	I	Red	17	1077099	R	NA	ABR;ABR	NM_021962;NM_001159746	Body;5'UTR	NA	NA
cg03064400	0.677314636	0.162869107	4.158643997	3.20E-05	0.358	0.997	0.02867767	II	NA	19	36235836	R	NA	U2AF1L4;U2AF1L4;PSENEN	NM_001040425;NM_144987;NM_172341	Body;Body;TSS1500	chr19:36235807-36236548	Island
cg03084103	0.417817975	0.115083939	3.630549813	0.000282818	0.192	0.643	0.048692052	II	NA	4	38869707	F	NA	MIR574;FAM114A1	NR_030300;NM_138389	Body;5'UTR	chr4:38869401-38869780	Island
cg03092607	-0.392521073	0.102395606	-3.833378113	0.000126395	-0.593	-0.192	0.03834897	I	Red	2	96068514	R	NA	FAHD2A;FAHD2A	NM_016044;NM_016044	5'UTR;1stExon	chr2:96068303-96068840	Island
cg03100511	0.363182495	0.091997951	3.947723744	7.89E-05	0.183	0.543	0.034106031	I	Grn	19	49173757	F	NA	SEC1;NTN5	NR_004401;NM_145807	Body;Body	chr19:49173600-49173806	Island
cg03119088	0.57847828	0.128740956	4.493350829	7.01E-06	0.326	0.831	0.020755975	I	Red	6	168445176	R	NA	KIF25;KIF25	NM_005355;NM_030615	Body;Body	chr6:168449070-168449349	N_Shelf
cg03127034	0.224738818	0.05762936	3.899727807	9.63E-05	0.112	0.338	0.035664673	I	Red	6	41561307	F	rs6920720	FOXP4;FOXP4;FOXP4	NM_001012426;NM_001012427;NM_138457	Body;Body;Body	chr6:41561221-41561473	Island
cg03131736	0.21360212	0.056942331	3.751200817	0.00017599	0.102	0.325	0.042087917	I	Red	19	50985397	F	NA	C19orf63;C19orf63	NM_206538;NM_175063	Body;3'UTR	chr19:50983853-50984075	S_Shore
cg03154536	-0.600141158	0.153118756	-3.919449019	8.88E-05	-0.9	-0.3	0.034938419	I	Grn	11	107799237	R	NA	RAB39	NM_017516	TSS200	chr11:107798958-107799980	Island
cg03160656	0.110038701	0.028270983	3.89228428	9.93E-05	0.055	0.165	0.035914659	II	NA	4	24772661	R	NA	NA	NA	NA	NA	NA
cg03169041	0.219628781	0.047589922	4.615027141	3.93E-06	0.126	0.313	0.019595269	II	NA	16	6533549	R	NA	A2BP1;A2BP1	NM_001142333;NM_018723	5'UTR;5'UTR	chr16:6533019-6533983	Island
cg03174294	-0.350299339	0.091776359	-3.816879909	0.00013515	-0.53	-0.17	0.038960227	I	Red	8	37654681	F	NA	GPR124;GPR124	NM_032777;NM_032777	5'UTR;1stExon	chr8:37654048-37656100	Island
cg03182218	0.313371571	0.08391192	3.734529834	0.000188066	0.149	0.478	0.042928254	I	Grn	17	7100221	R	NA	DLG4;DLG4	NM_001365;NM_001128827	Body;Body	NA	NA
cg03190944	0.389211472	0.10550425	3.689059644	0.000225084	0.182	0.596	0.045113145	I	Grn	16	88388231	F	rs75874978	NA	NA	NA	NA	NA
cg03196666	0.737853842	0.187466311	3.93592768	8.29E-05	0.37	1.105	0.034627589	II	NA	1	247279205	R	NA	NA	NA	NA	chr1:247279204-247279461	Island
cg03214325	0.497860417	0.131106856	3.797363723	0.000146243	0.241	0.755	0.039866813	I	Grn	17	1850539	F	NA	RTN4RL1	NM_178568	Body	NA	NA
cg03217572	0.343621644	0.065718564	5.228684609	1.71E-07	0.215	0.472	0.01381446	I	Red	7	142561918	R	NA	EPHB6	NM_004445	Body	NA	NA
cg03222971	-0.2599771	0.071632011	-3.629342474	0.000284144	-0.4	-0.12	0.048713332	I	Red	2	217559020	F	NA	IGFBP5	NM_000599	Body	chr2:217559039-217559484	N_Shore
cg03251918	-0.254768066	0.066724516	-3.8182078	0.000134425	-0.386	-0.124	0.038894395	I	Red	4	156298325	R	NA	MAP9	NM_001039580	TSS1500	chr4:156297601-156298094	S_Shore
cg03264884	-0.240278611	0.058258444	-4.124356803	3.72E-05	-0.354	-0.126	0.029421726	I	Red	22	31556567	F	NA	RNF185;RNF185;RNF185;RNF185;RNF185;RNF185;RNF185	NM_001135824;NM_152267;NR_024211;NR_024209;NR_024212;NM_001135825;NR_024210	5'UTR;5'UTR;Body;Body;Body;5'UTR;Body	chr22:31556124-31556466	S_Shore
cg03270995	0.424036646	0.110083336	3.851960342	0.000117176	0.208	0.64	0.037634396	I	Red	16	4790537	R	NA	C16orf71	NM_139170	Body	chr16:4790462-4790675	Island
cg03274739	0.244004486	0.066546903	3.666654238	0.000245745	0.114	0.374	0.046481088	I	Grn	11	98437942	R	NA	NA	NA	NA	NA	NA
cg03294124	-0.572479327	0.152301835	-3.758847203	0.000170698	-0.871	-0.274	0.041719339	I	Red	2	219537004	F	NA	RNF25;STK36	NM_022453;NM_015690	TSS1500;5'UTR	chr2:219536410-219536813	S_Shore
cg03307360	0.854339022	0.235245852	3.631685814	0.000281576	0.393	1.315	0.048642645	II	NA	1	227058426	F	NA	PSEN2;PSEN2	NM_000447;NM_012486	5'UTR;5'UTR	chr1:227058045-227058906	Island
cg03310370	0.741214313	0.203509096	3.642167976	0.000270352	0.342	1.14	0.047837573	II	NA	5	163851	R	NA	PLEKHG4B	NM_052909	Body	chr5:164710-166658	N_Shore
cg03315054	0.445843654	0.118330935	3.767769212	0.000164713	0.214	0.678	0.041274702	I	Red	5	14504133	R	NA	TRIO	NM_007118	Body	NA	NA
cg03320492	0.186547298	0.049602013	3.760881594	0.000169316	0.089	0.284	0.041598872	II	NA	1	45187810	R	NA	C1orf228	NM_001145636	Body	chr1:45189705-45190558	N_Shore
cg03321319	-0.350917679	0.091176489	-3.848773761	0.000118711	-0.53	-0.172	0.037893104	I	Red	22	22222323	F	NA	MAPK1;MAPK1	NM_138957;NM_002745	TSS1500;TSS1500	chr22:22221055-22222367	Island
cg03327570	0.438712105	0.121375431	3.614505031	0.000300922	0.201	0.677	0.04944806	I	Red	2	145304883	F	rs75883507	NA	NA	NA	NA	NA
cg03331514	0.295116737	0.070881231	4.163538521	3.13E-05	0.156	0.434	0.02849002	I	Red	7	1577016	R	NA	MAFK	NM_002360	5'UTR	chr7:1575736-1575993	S_Shore
cg03355690	-0.62738238	0.142809905	-4.393129305	1.12E-05	-0.907	-0.347	0.022508946	I	Red	6	35265616	F	rs34894602	DEF6;DEF6	NM_022047;NM_022047	1stExon;5'UTR	NA	NA
cg03356490	-0.528332572	0.142444738	-3.709035366	0.00020805	-0.808	-0.249	0.044203145	I	Red	19	35605867	F	NA	FXYD3;FXYD3;FXYD3;FXYD3;FXYD3;FXYD3;FXYD3;FXYD3	NM_001136012;NM_001136009;NM_001136010;NM_001136008;NM_001136011;NM_005971;NM_021910;NM_001136007	TSS1500;TSS1500;TSS1500;TSS1500;TSS1500;TSS1500;TSS1500;TSS1500	NA	NA
cg03360920	-0.459554065	0.11428872	-4.02099231	5.80E-05	-0.684	-0.236	0.031685944	I	Red	6	159421029	R	NA	RSPH3;RSPH3	NM_031924;NM_031924	1stExon;5'UTR	chr6:159420465-159421293	Island
cg03369465	0.213071872	0.055205618	3.859604887	0.000113571	0.105	0.321	0.037382944	I	Red	6	33291367	F	NA	DAXX;DAXX;DAXX;DAXX	NM_001141970;NR_024517;NM_001350;NM_001141969	TSS1500;TSS1500;TSS1500;TSS1500	chr6:33290370-33291087	S_Shore
cg03385846	-0.719163767	0.193599102	-3.714706115	0.00020344	-1.099	-0.34	0.04406837	I	Red	16	77756558	R	NA	NUDT7;NUDT7	NM_001105663;NR_024154	Body;Body	chr16:77756416-77756681	Island
cg03387353	-0.711286858	0.194438445	-3.658159561	0.000254033	-1.092	-0.33	0.04678312	I	Grn	8	61429246	F	NA	RAB2A	NM_002865	TSS1500	chr8:61429174-61430173	Island
cg03401902	-0.173765358	0.03922637	-4.429809836	9.43E-06	-0.251	-0.097	0.021227385	I	Red	12	116971165	F	rs7969566	NCRNA00173;NCRNA00173	NR_027345;NR_027346	TSS200;TSS200	NA	NA
cg03412097	-0.19444748	0.050920486	-3.818649293	0.000134184	-0.294	-0.095	0.038894395	I	Grn	11	95524327	R	NA	FAM76B;CEP57	NM_144664;NM_014679	TSS1500;Body	chr11:95522460-95524043	S_Shore
cg03414474	-0.384079742	0.098638325	-3.893818559	9.87E-05	-0.577	-0.191	0.035860465	I	Red	2	105488932	R	NA	NA	NA	NA	chr2:105488368-105489991	Island
cg03416154	-0.519079918	0.142175803	-3.650972297	0.000261249	-0.798	-0.24	0.047204961	I	Grn	22	21336337	R	NA	LZTR1	NM_006767	TSS1500	chr22:21336181-21336939	Island
cg03425468	-0.215742606	0.059463373	-3.62815958	0.000285449	-0.332	-0.099	0.048713332	I	Red	1	155164676	F	NA	MIR92B	NR_030281	TSS1500	chr1:155164199-155165160	Island
cg03426840	-0.369883525	0.096719667	-3.824284509	0.000131152	-0.559	-0.18	0.038688508	I	Red	11	118661678	R	NA	DDX6	NM_004397	5'UTR	chr11:118661305-118663026	Island
cg03428881	-0.752452606	0.174244708	-4.318367056	1.57E-05	-1.094	-0.411	0.024222597	I	Grn	7	150725579	F	NA	ABCB8;ABCB8	NM_007188;NM_007188	1stExon;5'UTR	chr7:150725173-150726018	Island
cg03433712	-0.374059994	0.089443646	-4.182074548	2.89E-05	-0.549	-0.199	0.028031223	I	Red	15	62352836	F	NA	VPS13C;VPS13C;VPS13C;VPS13C	NM_018080;NM_001018088;NM_020821;NM_017684	TSS200;TSS200;TSS200;TSS200	chr15:62352227-62353092	Island
cg03436208	0.271898281	0.073774915	3.685511256	0.000228244	0.127	0.416	0.045267646	I	Red	15	101988134	F	rs77939956	PCSK6;PCSK6;PCSK6;PCSK6;PCSK6;PCSK6;PCSK6;PCSK6	NM_002570;NM_138320;NM_138319;NM_138324;NM_138323;NM_138325;NM_138322;NM_138321	Body;Body;Body;Body;Body;Body;Body;Body	NA	NA
cg03460622	0.306406865	0.073926491	4.144750576	3.40E-05	0.162	0.451	0.029154396	I	Red	16	2138615	R	NA	TSC2;TSC2;TSC2	NM_001077183;NM_000548;NM_001114382	3'UTR;3'UTR;3'UTR	chr16:2139803-2142170	N_Shore
cg03466331	-0.16489556	0.044459755	-3.708872416	0.000208184	-0.252	-0.078	0.044203145	I	Red	15	40331067	F	rs11542827	SRP14	NM_003134	Body	chr15:40330991-40331563	Island
cg03474219	-0.39307372	0.100450191	-3.913120693	9.11E-05	-0.59	-0.196	0.035165173	I	Grn	11	64072691	F	NA	ESRRA	NM_004451	TSS1500	chr11:64072064-64073914	Island
cg03520938	0.28994698	0.067333995	4.30610097	1.66E-05	0.158	0.422	0.024222597	I	Red	8	21961713	R	NA	FAM160B2	NM_022749	3'UTR	NA	NA
cg03523077	-0.470113583	0.105155857	-4.470636216	7.80E-06	-0.676	-0.264	0.020877178	I	Red	13	20767208	F	NA	GJB2	NM_004004	TSS200	chr13:20766208-20767779	Island
cg03552025	0.453545925	0.104798631	4.32778481	1.51E-05	0.248	0.659	0.024222597	I	Red	12	52437451	F	rs2242107	NA	NA	NA	NA	NA
cg03564166	-0.198792344	0.05049556	-3.936828197	8.26E-05	-0.298	-0.1	0.034627589	I	Red	16	70380888	R	NA	DDX19A;DDX19A	NM_018332;NM_018332	5'UTR;1stExon	chr16:70380639-70380999	Island
cg03564748	0.330147838	0.086314822	3.824926349	0.000130811	0.161	0.499	0.038669756	I	Grn	11	67287251	F	NA	CABP2;CABP2	NM_016366;NM_031204	Body;Body	chr11:67287234-67287568	Island
cg03575969	0.636061019	0.16657558	3.818452964	0.000134291	0.31	0.963	0.038894395	I	Red	11	72492171	R	NA	STARD10	NM_006645	Body	chr11:72492281-72492644	N_Shore
cg03581262	0.26805229	0.066870803	4.008510112	6.11E-05	0.137	0.399	0.032349334	I	Red	2	106192732	R	NA	NA	NA	NA	NA	NA
cg03581421	-0.209453404	0.054650365	-3.832607558	0.000126792	-0.317	-0.102	0.038402435	I	Grn	20	49548197	F	NA	ADNP;ADNP	NM_015339;NM_181442	TSS1500;TSS1500	chr20:49548194-49548525	Island
cg03582286	-0.335500973	0.092661109	-3.620731252	0.000293772	-0.517	-0.154	0.049092143	I	Red	4	71571171	R	NA	RUFY3	NM_001130709	Body	chr4:71570147-71571626	Island
cg03582827	0.265256939	0.064724724	4.098232085	4.16E-05	0.138	0.392	0.029421726	I	Red	16	958339	R	rs77192950	LMF1	NM_022773	Body	chr16:959714-959977	N_Shore
cg03586839	0.36115763	0.097859843	3.690560072	0.000223761	0.169	0.553	0.045113145	II	NA	1	150601711	F	rs77115129	ENSA;ENSA;ENSA;ENSA;ENSA;ENSA;ENSA;ENSA	NM_207168;NM_207046;NM_207042;NM_207047;NM_004436;NM_207045;NM_207043;NM_207044	Body;TSS200;Body;TSS200;Body;TSS200;Body;Body	chr1:150601710-150602201	Island
cg03601886	0.374957252	0.077719697	4.824481666	1.40E-06	0.223	0.527	0.018650808	I	Red	1	53649218	F	NA	NA	NA	NA	NA	NA
cg03605066	0.153062127	0.040666335	3.763853518	0.000167315	0.073	0.233	0.041464024	I	Red	5	1786804	R	NA	NA	NA	NA	NA	NA
cg03609148	-0.264438847	0.069524393	-3.80354054	0.000142643	-0.401	-0.128	0.039411825	I	Red	6	151562634	F	NA	AKAP12	NM_005100	Body	chr6:151560766-151560993	S_Shore
cg03622875	-0.260551859	0.058886252	-4.424663624	9.66E-06	-0.376	-0.145	0.021276	I	Red	16	50187540	F	NA	PAPD5;PAPD5	NM_001040285;NM_001040284	Body;Body	NA	NA
cg03636200	0.166079224	0.030655344	5.41762708	6.04E-08	0.106	0.226	0.009774202	II	NA	17	80005395	F	NA	NA	NA	NA	chr17:80008514-80010567	N_Shelf
cg03637179	0.422939308	0.107181883	3.945996255	7.95E-05	0.213	0.633	0.034265616	II	NA	7	99716580	F	NA	TAF6;TAF6;TAF6;TAF6;TAF6;CNPY4;TAF6	NM_139123;NM_005641;NM_005641;NM_139315;NM_139123;NM_152755;NM_139122	5'UTR;1stExon;5'UTR;5'UTR;1stExon;TSS1500;5'UTR	NA	NA
cg03639488	0.32409677	0.080932901	4.004511944	6.21E-05	0.165	0.483	0.032399883	I	Red	5	136836378	F	rs10056019	SPOCK1	NM_004598	TSS1500	chr5:136834016-136835146	S_Shore
cg03639603	0.681577568	0.164039847	4.154951252	3.25E-05	0.36	1.003	0.028878369	II	NA	6	27806234	R	NA	HIST1H2BN;HIST1H2AK	NM_003520;NM_003510	TSS1500;TSS200	chr6:27805843-27806853	Island
cg03642695	0.458807111	0.120536851	3.80636384	0.000141025	0.223	0.695	0.039368142	I	Red	17	15211958	R	NA	TEKT3	NM_031898	Body	NA	NA
cg03653726	0.232942054	0.055153422	4.223528573	2.41E-05	0.125	0.341	0.025998984	I	Red	7	2769253	R	NA	GNA12	NM_007353	3'UTR	NA	NA
cg03657837	0.453309548	0.09893971	4.581674522	4.61E-06	0.259	0.647	0.019595269	I	Red	10	126256960	F	NA	LHPP;LHPP	NM_022126;NM_001167880	Body;Body	NA	NA
cg03660538	0.39248661	0.091589101	4.285298202	1.82E-05	0.213	0.572	0.024222597	I	Grn	3	123894269	R	NA	KALRN;KALRN	NM_001024660;NM_003947	Body;Body	NA	NA
cg03670816	-0.439305358	0.115222308	-3.81267626	0.00013747	-0.665	-0.213	0.038960227	I	Red	5	53606426	R	NA	ARL15	NM_019087	TSS200	chr5:53605932-53606798	Island
cg03671266	0.482545958	0.116064071	4.157582561	3.22E-05	0.255	0.71	0.028742874	I	Red	16	989969	F	NA	LMF1	NM_022773	Body	NA	NA
cg03691958	-0.274921379	0.075993045	-3.61771763	0.000297212	-0.424	-0.126	0.049224795	I	Red	11	113345618	F	rs79872790	DRD2;DRD2	NM_000795;NM_016574	5'UTR;5'UTR	chr11:113345068-113346328	Island
cg03697411	0.57915769	0.141381218	4.096425948	4.20E-05	0.302	0.856	0.029423672	II	NA	14	101419376	R	NA	SNORD114-4;SNORD114-3	NR_003196;NR_003195	TSS1500;TSS1500	NA	NA
cg03701005	0.711382419	0.174280744	4.081818816	4.47E-05	0.37	1.053	0.030006809	II	NA	17	40729832	F	NA	PSMC3IP;PSMC3IP	NM_016556;NM_013290	TSS200;TSS200	chr17:40729444-40729965	Island
cg03725652	0.57898562	0.13431457	4.310668754	1.63E-05	0.316	0.842	0.024222597	I	Red	18	76073399	R	NA	NA	NA	NA	chr18:76073274-76073558	Island
cg03728559	0.2992507	0.078214658	3.826018147	0.000130233	0.146	0.453	0.038626384	II	NA	16	69789280	R	NA	NOB1	NM_014062	TSS1500	chr16:69788469-69788984	S_Shore
cg03729204	0.537078691	0.146467773	3.666872778	0.000245535	0.25	0.824	0.046481088	I	Red	4	141266309	F	NA	SCOC;SCOC;SCOC;SCOC;SCOC	NM_001153585;NM_032547;NM_001153690;NM_001153635;NM_001153446	Body;Body;Body;Body;Body	NA	NA
cg03752104	0.838131451	0.232099004	3.611094557	0.000304907	0.383	1.293	0.049609997	I	Red	8	7597157	R	NA	FAM90A8	NM_001164450	Body	NA	NA
cg03754143	-0.64020968	0.164581009	-3.889936533	0.00010027	-0.963	-0.318	0.036061114	I	Grn	1	1981548	R	NA	PRKCZ	NM_002744	TSS1500	chr1:1981251-1983212	Island
cg03766703	0.164224303	0.040566487	4.048275192	5.16E-05	0.085	0.244	0.030699388	I	Red	19	46393454	F	NA	MYPOP	NM_001012643	3'UTR	chr19:46387327-46389578	S_Shelf
cg03772072	0.31945013	0.087154229	3.665342863	0.000247007	0.149	0.49	0.046554765	I	Red	6	35392381	F	NA	PPARD;PPARD	NM_177435;NM_006238	Body;Body	NA	NA
cg03808835	-0.337434406	0.081742169	-4.128033415	3.66E-05	-0.498	-0.177	0.029421726	II	NA	10	56560945	R	NA	PCDH15;PCDH15;PCDH15;PCDH15;PCDH15;PCDH15;PCDH15;PCDH15;PCDH15;PCDH15;PCDH15;PCDH15;PCDH15;PCDH15;PCDH15;PCDH15;PCDH15;PCDH15;PCDH15;PCDH15;PCDH15;PCDH15;PCDH15;PCDH15	NM_001142765;NM_001142773;NM_001142773;NM_033056;NM_001142771;NM_001142770;NM_001142769;NM_033056;NM_001142768;NM_001142769;NM_001142770;NM_001142763;NM_001142767;NM_001142771;NM_001142768;NM_001142772;NM_001142767;NM_001142764;NM_001142766;NM_001142765;NM_001142766;NM_001142772;NM_001142764;NM_001142763	5'UTR;5'UTR;1stExon;1stExon;1stExon;1stExon;1stExon;5'UTR;5'UTR;5'UTR;5'UTR;1stExon;5'UTR;5'UTR;1stExon;1stExon;1stExon;1stExon;1stExon;1stExon;5'UTR;5'UTR;5'UTR;5'UTR	NA	NA
cg03820828	-0.399530716	0.102405535	-3.901456264	9.56E-05	-0.6	-0.199	0.03565483	I	Red	2	219922362	F	NA	IHH	NM_002181	Body	chr2:219922154-219923130	Island
cg03862414	0.508203104	0.110691749	4.591156153	4.41E-06	0.291	0.725	0.019595269	I	Red	17	40824241	R	NA	PLEKHH3	NM_024927	Body	chr17:40821935-40823573	S_Shore
cg03865648	0.117469153	0.032199442	3.648173532	0.000264111	0.054	0.181	0.047509883	I	Red	3	173113856	R	NA	NA	NA	NA	chr3:173115404-173115775	N_Shore
cg03870501	0.94166024	0.216555828	4.348348637	1.37E-05	0.517	1.366	0.024216709	II	NA	11	73660722	F	rs73543094	DNAJB13	NM_153614	TSS1500	NA	NA
cg03870845	-0.817812834	0.209473683	-3.904131642	9.46E-05	-1.228	-0.407	0.035550511	I	Grn	17	52978014	F	NA	TOM1L1	NM_005486	TSS200	chr17:52977866-52978307	Island
cg03874653	0.662463058	0.181419036	3.651563099	0.000260649	0.307	1.018	0.047166692	II	NA	3	123380206	F	rs80257036	MYLK;MYLK;MYLK;MYLK	NM_053028;NM_053025;NM_053027;NM_053026	Body;Body;Body;Body	NA	NA
cg03878208	0.777064537	0.189940828	4.09108744	4.29E-05	0.405	1.149	0.029737104	I	Red	11	72483293	R	NA	STARD10	NM_006645	Body	NA	NA
cg03886085	0.522565641	0.126139986	4.142743783	3.43E-05	0.275	0.77	0.029154396	I	Red	11	619819	F	NA	MUPCDH;MUPCDH	NM_021924;NM_031264	Body;Body	chr11:621963-622176	N_Shelf
cg03888862	-0.317348981	0.084021968	-3.776976285	0.000158744	-0.482	-0.153	0.040714231	I	Grn	4	13486297	R	NA	RAB28;RAB28;RAB28	NM_001159601;NM_001017979;NM_004249	TSS1500;TSS1500;TSS1500	chr4:13485522-13486533	Island
cg03902233	-0.279954678	0.076466173	-3.661157165	0.000251079	-0.43	-0.13	0.046649341	I	Grn	6	122792987	R	NA	PKIB;SERINC1	NM_181794;NM_020755	TSS200;TSS200	chr6:122792758-122793091	Island
cg03903296	0.41332356	0.109245562	3.7834357	0.000154678	0.199	0.627	0.040478954	I	Red	2	242799562	R	NA	PDCD1	NM_005018	Body	chr2:242799488-242799696	Island
cg03921396	-0.218004112	0.052709359	-4.135965898	3.53E-05	-0.321	-0.115	0.029335273	I	Red	7	64467049	F	rs78918193	NA	NA	NA	NA	NA
cg03923838	-0.245389142	0.053387046	-4.596417335	4.30E-06	-0.35	-0.141	0.019595269	I	Red	6	132834330	R	NA	STX7;STX7	NM_003569;NM_003569	1stExon;5'UTR	chr6:132833798-132834349	Island
cg03936315	0.41166958	0.111013687	3.708277689	0.000208674	0.194	0.629	0.044203145	I	Grn	2	233749813	R	NA	NGEF;NGEF	NM_019850;NM_001114090	Body;Body	NA	NA
cg03940688	0.614177895	0.165436699	3.712464631	0.000205251	0.29	0.938	0.044165261	II	NA	20	46988236	R	NA	LOC284749	NR_026958	TSS1500	NA	NA
cg03946034	0.701161746	0.187423623	3.741053213	0.000183251	0.334	1.069	0.042598101	II	NA	14	91885274	R	NA	CCDC88C	NM_001080414	TSS1500	chr14:91883672-91885367	Island
cg03960589	0.484140073	0.126741046	3.819915394	0.000133497	0.236	0.733	0.038832516	I	Red	17	40840485	F	NA	CNTNAP1	NM_003632	Body	chr17:40838849-40839062	S_Shore
cg03984502	0.698491515	0.168611947	4.142597991	3.43E-05	0.368	1.029	0.029154396	II	NA	1	151805661	R	NA	RORC	NM_005060	TSS1500	NA	NA
cg03990588	0.444019799	0.111169451	3.994081065	6.49E-05	0.226	0.662	0.032748156	I	Red	2	85826175	F	NA	TMEM150A;TMEM150A;TMEM150A	NM_001031738;NM_153342;NR_033179	3'UTR;3'UTR;Body	chr2:85829266-85830237	N_Shelf
cg03991297	0.541444642	0.136612086	3.963372926	7.39E-05	0.274	0.809	0.033313339	I	Red	16	30429837	F	NA	ZNF771;ZNF771	NM_001142305;NM_016643	3'UTR;3'UTR	chr16:30428870-30429799	S_Shore
cg03992191	0.516466525	0.141488264	3.650242846	0.000261992	0.239	0.794	0.047268858	I	Red	22	22312957	R	NA	TOP3B	NM_003935	Body	chr22:22311564-22311819	S_Shore
cg03992926	-0.286949672	0.062117599	-4.619458509	3.85E-06	-0.409	-0.165	0.019595269	I	Red	1	186344761	R	NA	TPR;C1orf27;MIR548F1;C1orf27;C1orf27	NM_003292;NM_017847;NR_031642;NM_001164246;NM_001164245	TSS1500;TSS200;Body;TSS200;TSS200	chr1:186344124-186344848	Island
cg03992938	-0.549285957	0.134014402	-4.098708414	4.15E-05	-0.812	-0.287	0.029421726	I	Grn	3	42814705	F	rs11129974	CCDC13;CCDC13	NM_144719;NM_144719	1stExon;5'UTR	chr3:42814567-42814893	Island
cg03993171	-0.349629757	0.0913618	-3.8268703	0.000129783	-0.529	-0.171	0.038626384	I	Red	6	86388501	F	NA	SNORD50B;SNORD50A;SNHG5	NR_003044;NR_002743;NR_003038	TSS1500;TSS1500;TSS200	chr6:86387993-86389034	Island
cg04001704	0.273442845	0.074072278	3.691567937	0.000222876	0.128	0.419	0.045061793	I	Red	12	111801136	F	NA	FAM109A	NM_144671	Body	chr12:111800834-111801244	Island
cg04011897	0.291772465	0.077317671	3.773684101	0.000160854	0.14	0.443	0.040883775	I	Red	2	240014762	R	NA	HDAC4	NM_006037	Body	NA	NA
cg04015759	-0.302525762	0.073484565	-4.116861314	3.84E-05	-0.447	-0.158	0.029421726	I	Red	2	27718181	F	NA	FNDC4	NM_022823	TSS200	chr2:27717681-27718337	Island
cg04018571	-0.462265649	0.125092324	-3.695395812	0.000219544	-0.707	-0.217	0.044936151	I	Grn	2	96874059	R	NA	STARD7	NM_020151	1stExon	chr2:96873851-96874824	Island
cg04027074	-0.443243452	0.115135608	-3.849751277	0.000118238	-0.669	-0.218	0.03776703	I	Grn	6	144471431	R	NA	STX11	NM_003764	TSS1500	chr6:144471069-144472017	Island
cg04045089	-0.364939321	0.093805496	-3.890383139	0.000100086	-0.549	-0.181	0.036061114	I	Red	16	21170107	R	NA	DNAH3;TMEM159	NM_017539;NM_020422	Body;5'UTR	chr16:21169810-21170278	Island
cg04048796	-0.314168667	0.080423899	-3.906409287	9.37E-05	-0.472	-0.157	0.035550511	I	Red	4	57301372	R	NA	PAICS;PPAT;PAICS;PAICS	NM_001079524;NM_002703;NM_006452;NM_001079525	TSS1500;Body;TSS1500;TSS1500	chr4:57301340-57302670	Island
cg04072768	-0.589290758	0.151692928	-3.884760928	0.000102431	-0.887	-0.292	0.036379884	I	Grn	2	54683502	F	NA	SPTBN1;SPTBN1	NM_003128;NM_003128	5'UTR;1stExon	chr2:54682899-54684374	Island
cg04074004	0.316040628	0.083499417	3.784944133	0.000153743	0.152	0.48	0.040478954	I	Red	6	31696462	F	NA	DDAH2	NM_013974	Body	chr6:31695894-31698245	Island
cg04092513	-0.367199826	0.096602713	-3.80113369	0.000144036	-0.557	-0.178	0.039576113	I	Red	2	200819919	F	NA	C2orf60;C2orf60;C2orf47	NM_001039693;NR_004862;NM_024520	Body;Body;TSS200	chr2:200820053-200820716	N_Shore
cg04093972	0.864620523	0.218597838	3.955302256	7.64E-05	0.436	1.293	0.033768464	II	NA	1	61516130	F	NA	NA	NA	NA	chr1:61515875-61516831	Island
cg04098297	0.303465074	0.083129371	3.650515705	0.000261714	0.141	0.466	0.047253788	I	Red	13	114312482	F	NA	ATP4B;ATP4B	NM_000705;NM_000705	1stExon;5'UTR	NA	NA
cg04115025	-0.117720069	0.031936658	-3.686048494	0.000227763	-0.18	-0.055	0.045246176	I	Red	22	32807879	R	NA	C22orf28	NM_014306	Body	chr22:32807825-32808285	Island
cg04117832	-0.284510415	0.07294787	-3.900188087	9.61E-05	-0.427	-0.142	0.035664673	I	Red	2	152685230	R	NA	ARL5A;ARL5A;ARL5A	NM_001037174;NM_012097;NM_177985	TSS1500;TSS1500;TSS1500	chr2:152684475-152685131	S_Shore
cg04125586	0.307417949	0.073685066	4.17205228	3.02E-05	0.163	0.452	0.028293573	I	Red	1	201982404	R	NA	ELF3;ELF3	NM_004433;NM_001114309	Body;Body	NA	NA
cg04125765	0.262206273	0.068783034	3.812077731	0.000137804	0.127	0.397	0.038960227	I	Red	15	100533253	F	NA	ADAMTS17	NM_139057	Body	chr15:100533145-100533372	Island
cg04130557	0.463717096	0.128107169	3.619759136	0.000294877	0.213	0.715	0.049188294	II	NA	4	186760378	F	NA	SORBS2	NM_021069	5'UTR	NA	NA
cg04132264	-0.317575504	0.081155639	-3.913166215	9.11E-05	-0.477	-0.159	0.035165173	I	Grn	11	575426	F	rs78082951	LOC143666;PHRF1	NR_026967;NM_020901	Body;TSS1500	chr11:575464-577093	N_Shore
cg04138155	-0.405892822	0.101241366	-4.009159883	6.09E-05	-0.604	-0.207	0.032349334	I	Red	1	243419250	F	NA	SDCCAG8;CEP170;CEP170;CEP170	NM_006642;NM_014812;NM_001042405;NM_001042404	TSS200;TSS1500;TSS1500;TSS1500	chr1:243417741-243418775	S_Shore
cg04157272	0.756422404	0.142672254	5.301818546	1.15E-07	0.477	1.036	0.01381446	I	Red	2	68017838	R	NA	NA	NA	NA	NA	NA
cg04166618	-0.714830231	0.168863114	-4.233193476	2.30E-05	-1.046	-0.384	0.025746424	I	Grn	2	239140340	R	NA	LOC643387;LOC151174;LOC151174	NR_026923;NR_026925;NR_026926	Body;TSS200;TSS200	chr2:239140096-239140659	Island
cg04171803	-0.336864939	0.093097063	-3.618427144	0.000296399	-0.519	-0.154	0.049188294	I	Red	2	233561907	R	NA	GIGYF2;GIGYF2;GIGYF2;GIGYF2	NM_015575;NM_001103148;NM_001103146;NM_001103147	TSS200;TSS200;TSS200;TSS200	chr2:233562005-233562547	N_Shore
cg04181556	0.733458545	0.186502352	3.932704001	8.40E-05	0.368	1.099	0.034766319	II	NA	6	33267702	F	rs15604	TAPBP;TAPBP;RGL2;RGL2	NM_172209;NM_003190;NM_004761;NR_028387	3'UTR;3'UTR;TSS1500;TSS1500	chr6:33266302-33267582	S_Shore
cg04184623	-0.355446961	0.098276893	-3.616790794	0.000298278	-0.548	-0.163	0.049291232	I	Grn	2	217277352	R	NA	SMARCAL1;SMARCAL1;SMARCAL1	NM_014140;NM_014140;NM_001127207	1stExon;5'UTR;TSS200	chr2:217277037-217277557	Island
cg04200485	0.395467756	0.09818688	4.027704702	5.63E-05	0.203	0.588	0.03165045	II	NA	11	95900374	R	NA	MAML2	NM_032427	Body	NA	NA
cg04203298	-0.56041237	0.138789463	-4.037859644	5.39E-05	-0.832	-0.288	0.031107885	I	Red	11	59521722	F	NA	STX3	NM_004177	TSS1500	chr11:59522425-59523303	N_Shore
cg04212926	0.337112173	0.093310272	3.612808796	0.000302898	0.154	0.52	0.049486529	I	Red	1	45190912	F	NA	C1orf228	NM_001145636	Body	chr1:45189705-45190558	S_Shore
cg04217140	-0.259103834	0.062994145	-4.113141542	3.90E-05	-0.383	-0.136	0.029421726	I	Red	17	4613687	R	NA	ARRB2;ARRB2	NM_004313;NM_199004	TSS200;TSS200	chr17:4613400-4614423	Island
cg04222084	-0.223344315	0.053836027	-4.148603253	3.35E-05	-0.329	-0.118	0.029010242	I	Red	1	221915650	R	NA	DUSP10;DUSP10	NM_144729;NM_007207	TSS200;TSS200	chr1:221915474-221916804	Island
cg04228202	-0.42896941	0.100275167	-4.277922666	1.89E-05	-0.626	-0.232	0.024380182	I	Red	8	42010339	R	NA	AP3M2;AP3M2	NM_006803;NM_001134296	TSS200;TSS200	chr8:42009723-42011098	Island
cg04228274	-0.200294712	0.053349575	-3.754382555	0.000173769	-0.305	-0.096	0.041926963	I	Grn	13	21751145	F	NA	MRP63;SKA3;SKA3	NM_024026;NM_145061;NM_001166017	Body;TSS1500;TSS1500	chr13:21750287-21751332	Island
cg04244535	-0.453756915	0.10721025	-4.232402347	2.31E-05	-0.664	-0.244	0.025746424	I	Red	14	23236155	R	NA	OXA1L	NM_005015	Body	chr14:23235774-23236578	Island
cg04249559	0.346997943	0.077405279	4.48287182	7.36E-06	0.195	0.499	0.020802234	I	Red	12	655964	F	rs4980834	B4GALNT3	NM_173593	Body	NA	NA
cg04261192	-0.197235034	0.049216513	-4.007497147	6.14E-05	-0.294	-0.101	0.032349334	II	NA	11	20691341	R	NA	NELL1;NELL1	NM_006157;NM_201551	Body;Body	chr11:20690579-20691845	Island
cg04261556	0.133145457	0.034313145	3.880304639	0.000104326	0.066	0.2	0.036545011	II	NA	7	20373143	R	NA	ITGB8	NM_002214	Body	chr7:20370003-20371504	S_Shore
cg04263316	0.342197661	0.094244201	3.630967814	0.00028236	0.157	0.527	0.048647751	I	Grn	7	135412406	R	NA	SLC13A4;SLC13A4	NM_012450;NM_012450	5'UTR;1stExon	NA	NA
cg04282723	0.917657601	0.237635059	3.861625485	0.000112635	0.452	1.383	0.03735502	II	NA	11	975233	R	NA	AP2A2	NM_012305	Body	chr11:975211-975776	Island
cg04297868	0.398389158	0.099038097	4.022584952	5.76E-05	0.204	0.593	0.031685944	II	NA	2	71016885	F	NA	FIGLA	NM_001004311	Body	chr2:71017028-71017976	N_Shore
cg04307987	-0.301921999	0.073224859	-4.12321718	3.74E-05	-0.445	-0.158	0.029421726	I	Red	6	3000368	R	NA	NQO2	NM_000904	5'UTR	chr6:3000069-3000520	Island
cg04344923	0.541829546	0.145514928	3.72353238	0.000196455	0.257	0.827	0.043450484	I	Red	7	1569228	F	NA	MAFK	NM_002360	TSS1500	chr7:1570406-1571136	N_Shore
cg04387739	0.339391208	0.088430032	3.837963175	0.000124059	0.166	0.513	0.038212771	I	Red	4	3255689	R	NA	C4orf44;C4orf44	NM_001012982;NM_001042690	Body;Body	chr4:3254957-3255175	S_Shore
cg04402350	0.264147136	0.053478087	4.939352739	7.84E-07	0.159	0.369	0.016988272	II	NA	4	146857565	R	NA	ZNF827	NM_178835	Body	chr4:146857334-146859082	Island
cg04402633	-0.382961169	0.096257659	-3.978500752	6.94E-05	-0.572	-0.194	0.032873036	I	Red	11	2907113	R	NA	CDKN1C;CDKN1C;CDKN1C	NM_000076;NM_001122630;NM_001122631	TSS200;TSS200;TSS200	chr11:2907308-2907675	N_Shore
cg04414295	-0.32447337	0.079072922	-4.103470108	4.07E-05	-0.479	-0.169	0.029421726	I	Red	14	102606318	F	NA	WDR20;WDR20;HSP90AA1;WDR20;WDR20;WDR20	NM_144574;NM_181302;NM_001017963;NM_181302;NM_181308;NM_181291	1stExon;1stExon;TSS1500;5'UTR;1stExon;1stExon	chr14:102605597-102606977	Island
cg04419754	0.275776314	0.073777908	3.737925373	0.000185545	0.131	0.42	0.042714236	I	Red	22	20044371	F	NA	C22orf25	NM_152906	Body	NA	NA
cg04441667	-0.665166803	0.18033678	-3.688470011	0.000225607	-1.019	-0.312	0.045113145	II	NA	8	11356603	F	NA	BLK	NM_001715	5'UTR	NA	NA
cg04450032	-0.643458066	0.161971317	-3.97266676	7.11E-05	-0.961	-0.326	0.033038921	I	Red	17	7382860	F	NA	ZBTB4;ZBTB4;ZBTB4	NM_001128833;NM_001128833;NM_020899	1stExon;5'UTR;5'UTR	chr17:7382266-7382710	S_Shore
cg04463397	0.245541677	0.065064346	3.773828421	0.000160761	0.118	0.373	0.040883775	I	Red	6	168556793	F	rs2130608	NA	NA	NA	NA	NA
cg04475298	-0.403808222	0.107789364	-3.74627148	0.000179482	-0.615	-0.193	0.042326491	I	Grn	8	10697365	R	NA	PINX1	NM_017884	TSS200	chr8:10697016-10697634	Island
cg04483711	0.594968849	0.157473627	3.778212647	0.000157958	0.286	0.904	0.040684612	I	Grn	1	3347994	F	NA	PRDM16;PRDM16	NM_022114;NM_199454	Body;Body	chr1:3351365-3351632	N_Shelf
cg04484947	-0.389559438	0.104286507	-3.735473066	0.000187363	-0.594	-0.185	0.042853814	I	Red	1	32931323	F	NA	ZBTB8B	NM_001145720	5'UTR	chr1:32930500-32931061	S_Shore
cg04489803	-0.117756786	0.029673631	-3.96839823	7.24E-05	-0.176	-0.06	0.033182459	II	NA	3	98621184	R	NA	DCBLD2	NM_080927	TSS1500	chr3:98620131-98620910	S_Shore
cg04505313	-0.693920809	0.176901568	-3.922637986	8.76E-05	-1.041	-0.347	0.034883186	II	NA	6	31470807	F	rs2516428	MICB	NM_005931	Body	NA	NA
cg04515913	-0.658367428	0.175218514	-3.757407898	0.000171683	-1.002	-0.315	0.041823345	I	Red	15	89182103	F	NA	ISG20;ISG20	NM_002201;NM_002201	1stExon;5'UTR	NA	NA
cg04520396	0.492383518	0.131974174	3.730908128	0.000190791	0.234	0.751	0.043136352	I	Grn	17	1585312	R	NA	PRPF8	NM_006445	Body	chr17:1587787-1588400	N_Shelf
cg04521409	-0.37221857	0.099779263	-3.730420128	0.000191161	-0.568	-0.177	0.043136352	I	Grn	20	34287082	R	NA	ROMO1;NFS1	NM_080748;NM_021100	TSS200;Body	chr20:34286821-34287701	Island
cg04532613	0.310328461	0.085209049	3.641966006	0.000270564	0.143	0.477	0.047837573	I	Grn	10	22764566	F	NA	NA	NA	NA	chr10:22764708-22767050	N_Shore
cg04547554	-0.393629327	0.085713272	-4.592396447	4.38E-06	-0.562	-0.226	0.019595269	I	Red	19	41860013	F	rs17516265	TGFB1	NM_000660	TSS200	chr19:41858527-41860100	Island
cg04550439	0.192193899	0.053170853	3.614647687	0.000300756	0.088	0.296	0.04944806	I	Grn	21	44904941	F	NA	NA	NA	NA	chr21:44904961-44905259	N_Shore
cg04551318	0.323613689	0.087926725	3.680492937	0.000232784	0.151	0.496	0.045645875	I	Grn	1	2823297	F	rs750786	NA	NA	NA	NA	NA
cg04551967	0.227374927	0.059154893	3.843721382	0.000121183	0.111	0.343	0.037921489	I	Red	17	1837764	R	NA	NA	NA	NA	chr17:1837587-1837859	Island
cg04585390	0.358994264	0.095938233	3.741931179	0.000182612	0.171	0.547	0.042598101	I	Red	17	18918311	R	NA	SLC5A10;SLC5A10	NM_001042450;NM_152351	Body;Body	chr17:18918268-18918568	Island
cg04603391	-0.545911459	0.140136666	-3.895564773	9.80E-05	-0.821	-0.271	0.035790591	I	Red	19	31844056	R	NA	NA	NA	NA	chr19:31843880-31844183	Island
cg04611161	0.73993378	0.194805228	3.798326098	0.000145677	0.358	1.122	0.039757015	II	NA	16	52641156	R	NA	NA	NA	NA	NA	NA
cg04616544	0.504364277	0.135939834	3.710202244	0.000207094	0.238	0.771	0.044165261	II	NA	17	33815523	F	NA	SLFN12L	NM_001145027	Body	chr17:33814234-33814947	S_Shore
cg04622775	0.291156372	0.073971772	3.936047005	8.28E-05	0.146	0.436	0.034627589	I	Red	15	89442186	F	rs1802944	MFGE8;MFGE8	NM_001114614;NM_005928	3'UTR;3'UTR	chr15:89438176-89438850	S_Shelf
cg04652621	-0.251885558	0.062973753	-3.999849863	6.34E-05	-0.375	-0.128	0.032564077	I	Red	7	150671807	F	NA	KCNH2;KCNH2	NM_172056;NM_000238	Body;Body	chr7:150671806-150672370	Island
cg04653776	-1.592437848	0.430056546	-3.702856902	0.000213185	-2.435	-0.75	0.044588933	I	Red	20	32399093	R	NA	CHMP4B	NM_176812	TSS200	chr20:32399262-32399550	N_Shore
cg04700737	-0.242573569	0.065271053	-3.716403503	0.000202079	-0.371	-0.115	0.043858591	I	Red	13	31040184	F	NA	HMGB1	NM_002128	TSS200	NA	NA
cg04707217	0.35871147	0.089675462	4.00010731	6.33E-05	0.183	0.534	0.032563129	I	Grn	10	133858741	R	NA	NA	NA	NA	NA	NA
cg04769798	0.376651206	0.098543797	3.822170612	0.000132282	0.184	0.57	0.038710152	I	Red	16	87714169	R	NA	JPH3	NM_020655	Body	chr16:87714600-87715315	N_Shore
cg04771838	-0.353479826	0.094821527	-3.727843638	0.000193125	-0.539	-0.168	0.043354241	I	Red	13	110993474	F	NA	COL4A2	NM_001846	Body	NA	NA
cg04793916	-0.25017089	0.062861361	-3.979724388	6.90E-05	-0.373	-0.127	0.032844427	I	Red	14	71275942	F	rs3742847	MAP3K9	NM_033141	TSS200	chr14:71275512-71276571	Island
cg04802271	-0.368831274	0.101965045	-3.617232486	0.00029777	-0.569	-0.169	0.049257521	I	Grn	22	39930989	R	NA	NA	NA	NA	chr22:39930803-39931115	Island
cg04805065	0.351414594	0.08302685	4.232541581	2.31E-05	0.189	0.514	0.025746424	I	Red	17	17717947	F	rs56088670	MIR33B;SREBF1;SREBF1	NR_030361;NM_004176;NM_001005291	TSS1500;Body;Body	chr17:17715696-17716219	S_Shore
cg04828509	-0.178805763	0.040893483	-4.372475729	1.23E-05	-0.259	-0.099	0.02323787	I	Red	7	98923380	F	NA	ARPC1A	NM_006409	TSS200	chr7:98923235-98923975	Island
cg04838747	-0.167422001	0.045455894	-3.683174723	0.000230347	-0.257	-0.078	0.04545524	I	Red	1	92950450	R	NA	GFI1;GFI1;GFI1	NM_001127216;NM_005263;NM_001127215	5'UTR;5'UTR;TSS1500	chr1:92945907-92952609	Island
cg04843051	0.430630718	0.107309644	4.012973131	6.00E-05	0.22	0.641	0.032149328	I	Grn	6	13849011	F	NA	NA	NA	NA	NA	NA
cg04847110	0.61936956	0.167632458	3.694806895	0.000220054	0.291	0.948	0.044946924	II	NA	15	40620444	F	NA	NA	NA	NA	chr15:40615099-40616913	S_Shelf
cg04865506	0.375976672	0.093454324	4.023106199	5.74E-05	0.193	0.559	0.031685944	II	NA	17	29422776	R	NA	NF1;NF1;NF1	NM_001042492;NM_001128147;NM_000267	Body;Body;Body	chr17:29421595-29422067	S_Shore
cg04873221	-0.184074918	0.048257481	-3.81443283	0.000136496	-0.279	-0.089	0.038960227	I	Red	11	107992290	F	rs36216231	ACAT1;ACAT1	NM_000019;NM_000019	5'UTR;1stExon	chr11:107992004-107992731	Island
cg04892724	0.297739698	0.081865704	3.636928306	0.000275909	0.137	0.458	0.048185963	I	Red	7	4275784	R	NA	SDK1;SDK1	NR_027816;NM_152744	Body;Body	NA	NA
cg04923174	0.176232759	0.04887216	3.605994891	0.000310959	0.08	0.272	0.049993209	II	NA	1	158549277	F	NA	OR10X1	NM_001004477	1stExon	NA	NA
cg04923394	0.429232498	0.118686611	3.616519955	0.00029859	0.197	0.662	0.049309244	I	Red	7	154685308	F	NA	DPP6;DPP6;DPP6	NM_130797;NM_001039350;NM_001936	3'UTR;3'UTR;3'UTR	chr7:154684402-154684630	S_Shore
cg04931913	0.72522719	0.195549547	3.708662083	0.000208357	0.342	1.108	0.044203145	II	NA	3	10394210	R	NA	ATP2B2;ATP2B2	NM_001683;NM_001001331	Body;Body	NA	NA
cg04945216	0.220045037	0.057190047	3.847610702	0.000119275	0.108	0.332	0.037898973	II	NA	7	3186788	F	rs17133072	NA	NA	NA	NA	NA
cg04960007	0.272068457	0.074540836	3.649924948	0.000262317	0.126	0.418	0.047309815	II	NA	17	5820294	R	NA	NA	NA	NA	NA	NA
cg04965246	-0.324878717	0.087193984	-3.725930426	0.000194596	-0.496	-0.154	0.043413974	I	Red	12	110562200	R	NA	IFT81;IFT81;IFT81;IFT81;IFT81;IFT81	NM_001143779;NM_014055;NM_031473;NM_001143779;NM_031473;NM_014055	1stExon;1stExon;5'UTR;5'UTR;1stExon;5'UTR	chr12:110562095-110562700	Island
cg04967494	0.46278842	0.117603012	3.935174894	8.31E-05	0.232	0.693	0.034646859	I	Red	16	89264889	R	NA	NA	NA	NA	chr16:89267823-89268087	N_Shelf
cg04988287	-0.185239723	0.047637902	-3.888494516	0.000100868	-0.279	-0.092	0.03614214	I	Grn	16	79804561	F	NA	NA	NA	NA	chr16:79804241-79804694	Island
cg04990202	0.272444637	0.06951045	3.919477402	8.87E-05	0.136	0.409	0.034938419	I	Red	1	153581750	F	NA	S100A16	NM_080388	5'UTR	NA	NA
cg04990472	0.482319218	0.123097516	3.918188052	8.92E-05	0.241	0.724	0.035045283	II	NA	14	69950043	F	NA	FLJ44817	NM_001161498	TSS1500	chr14:69950459-69951916	N_Shore
cg04991071	0.57390258	0.13841696	4.146186867	3.38E-05	0.303	0.845	0.029122839	II	NA	3	71615924	R	NA	FOXP1;FOXP1	NM_032682;NM_001012505	5'UTR;5'UTR	NA	NA
cg04999824	0.879525864	0.188498447	4.665958147	3.07E-06	0.51	1.249	0.019595269	I	Red	17	76967757	F	rs61729727	LGALS3BP	NM_005567	Body	NA	NA
cg05014499	0.467518143	0.120586857	3.877024043	0.000105742	0.231	0.704	0.036634949	II	NA	2	241228765	F	NA	NA	NA	NA	NA	NA
cg05020775	-0.402939632	0.100683004	-4.002062065	6.28E-05	-0.6	-0.206	0.032467165	I	Red	20	1246934	F	NA	SNPH	NM_014723	TSS200	chr20:1246693-1247485	Island
cg05021312	0.357230473	0.092741402	3.851898567	0.000117206	0.175	0.539	0.037634396	II	NA	20	32078768	R	NA	CBFA2T2	NM_001032999	Body	chr20:32077657-32078469	S_Shore
cg05025159	0.342934898	0.092957625	3.689152972	0.000225002	0.161	0.525	0.045113145	I	Red	2	241905733	F	rs12466789	NA	NA	NA	chr2:241905704-241905911	Island
cg05058809	0.276338706	0.075104939	3.679367945	0.000233813	0.129	0.424	0.045718438	I	Red	16	834201	R	NA	MSLNL	NM_001025190	TSS1500	chr16:832827-833042	S_Shore
cg05060843	0.389436172	0.09973078	3.904874409	9.43E-05	0.194	0.585	0.035550511	I	Red	21	43162018	F	rs56149248	RIPK4	NM_020639	Body	chr21:43160916-43161948	S_Shore
cg05062510	0.571965943	0.145829709	3.922149664	8.78E-05	0.286	0.858	0.034883186	I	Red	7	158339017	F	rs73729688	PTPRN2;PTPRN2;PTPRN2	NM_002847;NM_130842;NM_130843	Body;Body;Body	chr7:158342660-158342964	N_Shelf
cg05068461	-0.286328152	0.070774808	-4.045622417	5.22E-05	-0.425	-0.148	0.030897333	I	Grn	11	45392805	F	NA	NA	NA	NA	NA	NA
cg05099121	-0.463489311	0.11753719	-3.943341769	8.04E-05	-0.694	-0.233	0.034343788	I	Red	7	91764089	R	NA	CYP51A1;CYP51A1	NM_001146152;NM_000786	TSS200;TSS1500	chr7:91763095-91764367	Island
cg05099145	0.186511947	0.042886732	4.348942898	1.37E-05	0.102	0.271	0.024216709	I	Red	16	1796333	R	NA	MAPK8IP3;MAPK8IP3	NM_001040439;NM_015133	Body;Body	chr16:1796810-1797229	N_Shore
cg05100739	-0.24736388	0.064082354	-3.860093515	0.000113344	-0.373	-0.122	0.03735502	I	Red	17	72733163	R	NA	RAB37;RAB37;RAB37;RAB37	NM_001006638;NM_001163989;NM_175738;NM_001163990	TSS200;1stExon;Body;TSS200	chr17:72732848-72733545	Island
cg05157912	0.612333733	0.164537737	3.721539782	0.000198012	0.29	0.935	0.043498886	I	Grn	14	75894395	F	NA	JDP2;JDP2;JDP2	NM_001135047;NM_001135048;NM_130469	TSS200;TSS1500;TSS1500	chr14:75894308-75895469	Island
cg05158219	0.571327146	0.147019091	3.886074551	0.000101878	0.283	0.859	0.036316523	II	NA	17	27230214	R	NA	DHRS13	NM_144683	TSS200	chr17:27229475-27230178	S_Shore
cg05158913	0.491616691	0.131424115	3.740688606	0.000183517	0.234	0.749	0.04260355	I	Red	17	3850769	R	NA	ATP2A3;ATP2A3;ATP2A3;ATP2A3;ATP2A3;ATP2A3;ATP2A3	NM_174954;NM_174955;NM_174956;NM_174957;NM_174953;NM_174958;NM_005173	Body;Body;Body;Body;Body;Body;Body	chr17:3850714-3851133	Island
cg05168200	-0.355817157	0.095130338	-3.740312135	0.000183792	-0.542	-0.169	0.04260355	I	Red	16	3096109	R	NA	MMP25	NM_022468	TSS1500	chr16:3095600-3097033	Island
cg05168378	-0.706808074	0.194198896	-3.639609124	0.000273052	-1.087	-0.326	0.047959033	I	Grn	7	100425517	F	NA	EPHB4	NM_004444	TSS1500	chr7:100424424-100425626	Island
cg05168842	-0.799861412	0.205781264	-3.88694964	0.000101512	-1.203	-0.397	0.036239117	I	Grn	11	61584319	R	NA	FADS1	NM_013402	1stExon	chr11:61582573-61584728	Island
cg05170353	0.190965447	0.052202106	3.658194334	0.000253998	0.089	0.293	0.04678312	I	Red	10	134300922	F	NA	NA	NA	NA	chr10:134304307-134304615	N_Shelf
cg05171761	0.409393643	0.110264275	3.712840308	0.000204946	0.193	0.626	0.044165261	I	Red	15	25432321	R	NA	SNORD115-10	NR_003302	TSS1500	NA	NA
cg05178683	0.76640357	0.192492333	3.981475813	6.85E-05	0.389	1.144	0.032844427	II	NA	4	958773	F	rs77995383	DGKQ	NM_001347	Body	chr4:960505-960836	N_Shore
cg05187833	-1.189192953	0.284939071	-4.173499086	3.00E-05	-1.748	-0.631	0.028253511	I	Grn	6	17706939	R	NA	NUP153	NM_005124	TSS200	chr6:17706292-17707339	Island
cg05218346	-0.245270965	0.064832624	-3.783141088	0.000154862	-0.372	-0.118	0.040478954	I	Grn	14	70041283	F	NA	NA	NA	NA	chr14:70041213-70041662	Island
cg05223638	0.256860615	0.06358014	4.039950414	5.35E-05	0.132	0.381	0.031107885	II	NA	1	3036168	R	NA	PRDM16;PRDM16	NM_022114;NM_199454	Body;Body	chr1:3038067-3038343	N_Shore
cg05226292	-0.296320364	0.080823933	-3.666245285	0.000246138	-0.455	-0.138	0.046481088	I	Grn	8	71520850	R	NA	TRAM1	NM_014294	TSS200	chr8:71519680-71520857	Island
cg05232081	0.229895761	0.060814945	3.780251078	0.00015667	0.111	0.349	0.040544349	II	NA	2	10567526	R	NA	HPCAL1;HPCAL1	NM_134421;NM_002149	3'UTR;3'UTR	chr2:10566889-10567148	S_Shore
cg05241839	-0.368255582	0.093479235	-3.939437262	8.17E-05	-0.551	-0.185	0.034533653	I	Red	16	53537463	F	NA	AKTIP;AKTIP	NM_001012398;NM_022476	TSS1500;TSS1500	chr16:53536501-53537685	Island
cg05260031	0.328747413	0.076089358	4.320543941	1.56E-05	0.18	0.478	0.024222597	I	Red	8	145677584	F	NA	CYHR1	NM_138496	Body	chr8:145675351-145676142	S_Shore
cg05274755	0.433785486	0.115086636	3.769208129	0.000163766	0.208	0.659	0.041261286	I	Grn	14	33408401	F	NA	NPAS3;NPAS3;NPAS3;NPAS3	NM_173159;NM_001164749;NM_022123;NM_001165893	TSS200;TSS200;TSS200;TSS200	NA	NA
cg05281418	-0.240768906	0.065414434	-3.680669384	0.000232622	-0.369	-0.113	0.045645875	I	Red	7	20836900	F	NA	NA	NA	NA	chr7:20837551-20838369	N_Shore
cg05293430	0.515373458	0.119909744	4.298011503	1.72E-05	0.28	0.75	0.024222597	I	Red	3	14444035	R	NA	SLC6A6;SLC6A6;SLC6A6	NM_001134368;NM_003043;NM_001134367	TSS200;TSS200;TSS200	chr3:14443629-14444577	Island
cg05295841	0.34077944	0.093523667	3.643777571	0.000268666	0.157	0.524	0.047777671	I	Red	19	18771126	R	NA	KLHL26	NM_018316	Body	chr19:18771078-18771340	Island
cg05304622	-0.413000038	0.110929878	-3.723073047	0.000196813	-0.63	-0.196	0.043453777	I	Red	19	38924282	R	NA	RYR1;RYR1	NM_000540;NM_001042723	TSS200;TSS200	chr19:38924239-38924519	Island
cg05310613	-0.311714362	0.082877648	-3.761139092	0.000169141	-0.474	-0.149	0.041598872	I	Grn	6	139456890	F	NA	HECA	NM_016217	Body	chr6:139456037-139457121	Island
cg05313302	-0.22208453	0.054029473	-4.110433003	3.95E-05	-0.328	-0.116	0.029421726	I	Grn	10	75006908	F	NA	DNAJC9	NM_015190	1stExon	chr10:75006629-75007184	Island
cg05325390	0.697975686	0.190831608	3.657547573	0.00025464	0.324	1.072	0.04678312	II	NA	16	23464715	R	NA	COG7	NM_153603	TSS1500	chr16:23463990-23464629	S_Shore
cg05347878	-0.330787205	0.084296808	-3.924077473	8.71E-05	-0.496	-0.166	0.034883186	I	Red	9	98784231	F	rs13294612	NCRNA00092	NR_024129	TSS200	chr9:98783216-98784364	Island
cg05364759	-0.373949736	0.097185269	-3.847802674	0.000119182	-0.564	-0.183	0.037898973	I	Red	1	21835945	F	NA	ALPL;ALPL	NM_000478;NM_000478	5'UTR;1stExon	chr1:21835548-21836344	Island
cg05367028	0.308762287	0.084423573	3.657299467	0.000254887	0.143	0.474	0.04678312	I	Grn	7	151506424	R	NA	PRKAG2;PRKAG2	NM_001040633;NM_016203	5'UTR;Body	NA	NA
cg05383670	-0.317102939	0.084324854	-3.760492014	0.000169579	-0.482	-0.152	0.041598872	I	Red	11	64879206	R	NA	TM7SF2	NM_003273	TSS200	chr11:64879046-64880413	Island
cg05386726	0.369384287	0.086547625	4.267988727	1.97E-05	0.2	0.539	0.024617991	I	Red	1	48030004	F	NA	NA	NA	NA	NA	NA
cg05389560	0.406576639	0.096639101	4.207164942	2.59E-05	0.217	0.596	0.026726295	II	NA	12	21654664	R	NA	RECQL;RECQL;GOLT1B	NM_032941;NM_002907;NM_016072	TSS200;TSS200;TSS200	chr12:21654396-21654956	Island
cg05390018	-0.238608244	0.060385242	-3.951433105	7.77E-05	-0.357	-0.12	0.033886467	I	Red	17	17140580	F	NA	FLCN;FLCN	NM_144997;NM_144606	TSS200;TSS200	chr17:17140117-17141080	Island
cg05412459	0.435824381	0.106602244	4.088322759	4.35E-05	0.227	0.645	0.029794831	II	NA	12	75908973	R	NA	NA	NA	NA	chr12:75905219-75905518	S_Shelf
cg05415724	-0.26281899	0.067727247	-3.880550299	0.00010422	-0.396	-0.13	0.036545011	I	Red	2	113033170	R	NA	ZC3H6	NM_198581	TSS200	chr2:113032793-113033496	Island
cg05429508	0.301103246	0.081000542	3.717299146	0.000201364	0.142	0.46	0.043781737	I	Red	4	517674	R	NA	PIGG;PIGG	NM_017733;NM_001127178	Body;Body	NA	NA
cg05437476	0.17568162	0.040862214	4.299366134	1.71E-05	0.096	0.256	0.024222597	I	Red	16	88233989	F	NA	NA	NA	NA	chr16:88233988-88234190	Island
cg05438183	0.497786509	0.11577129	4.299740526	1.71E-05	0.271	0.725	0.024222597	I	Red	7	149582572	F	rs78965793	NA	NA	NA	NA	NA
cg05444514	0.560579503	0.147637157	3.797008238	0.000146453	0.271	0.85	0.039879222	II	NA	6	466935	F	rs73374983	NA	NA	NA	NA	NA
cg05452084	0.518415103	0.120272003	4.310355626	1.63E-05	0.283	0.754	0.024222597	I	Red	16	88555715	F	NA	ZFPM1	NM_153813	Body	chr16:88554354-88554847	S_Shore
cg05457264	-0.343460383	0.088004626	-3.902753747	9.51E-05	-0.516	-0.171	0.035587932	I	Grn	15	86338252	R	NA	KLHL25	NM_022480	TSS200	chr15:86337418-86338429	Island
cg05479627	0.284891723	0.077893134	3.657469022	0.000254718	0.132	0.438	0.04678312	II	NA	16	869560	R	NA	NA	NA	NA	chr16:867032-867833	S_Shore
cg05483731	0.112885961	0.03097937	3.643907605	0.00026853	0.052	0.174	0.047777671	I	Grn	12	132845481	R	NA	GALNT9	NM_001122636	Body	chr12:132845758-132846356	N_Shore
cg05486650	0.580061095	0.152063863	3.814588722	0.00013641	0.282	0.878	0.038960227	I	Red	12	52448908	F	NA	NR4A1;NR4A1	NM_002135;NM_173157	Body;Body	chr12:52444553-52445421	S_Shelf
cg05491930	-0.47958156	0.132981782	-3.60637038	0.00031051	-0.74	-0.219	0.049993209	I	Grn	6	99872786	F	NA	SFRS18;SFRS18	NM_015491;NM_032870	5'UTR;5'UTR	chr6:99872726-99873206	Island
cg05506908	-0.346315742	0.080868161	-4.282473308	1.85E-05	-0.505	-0.188	0.02428564	I	Red	15	78799584	F	NA	AGPHD1;AGPHD1	NM_001013619;NM_001083612	TSS1500;TSS1500	chr15:78799546-78800327	Island
cg05521474	0.239923457	0.064841889	3.700130576	0.000215489	0.113	0.367	0.044710377	I	Grn	5	135082196	R	NA	NA	NA	NA	NA	NA
cg05541125	0.329177302	0.088255874	3.729806149	0.000191627	0.156	0.502	0.043143241	II	NA	21	35288408	R	NA	ATP5O	NM_001697	TSS1500	chr21:35287803-35288208	S_Shore
cg05575995	-0.24668498	0.059015402	-4.180010137	2.91E-05	-0.362	-0.131	0.028031223	I	Red	5	52083753	F	NA	ITGA1;PELO	NM_181501;NM_015946	TSS1500;TSS200	chr5:52083946-52084287	N_Shore
cg05576016	-0.279370094	0.076474103	-3.653133332	0.00025906	-0.429	-0.129	0.04704744	I	Red	12	12966271	F	NA	DDX47;DDX47	NM_201224;NM_016355	TSS200;TSS200	chr12:12966123-12966349	Island
cg05586863	0.392712262	0.087691219	4.478353331	7.52E-06	0.221	0.565	0.020877178	II	NA	16	5911262	F	rs1436383	NA	NA	NA	NA	NA
cg05592363	-0.325877449	0.090050882	-3.618814621	0.000295956	-0.502	-0.149	0.049188294	I	Red	5	78908495	F	NA	PAPD4;PAPD4;PAPD4;PAPD4;PAPD4;PAPD4	NM_001114393;NM_001114394;NM_001114393;NM_001114394;NM_173797;NM_173797	1stExon;1stExon;5'UTR;5'UTR;1stExon;5'UTR	chr5:78908219-78908691	Island
cg05594095	0.550877108	0.148926664	3.698982405	0.000216466	0.259	0.843	0.044762902	I	Grn	1	6476916	R	NA	HES2	NM_019089	3'UTR	chr1:6479057-6480938	N_Shelf
cg05622441	-0.26974305	0.073713202	-3.659358732	0.000252847	-0.414	-0.125	0.046763384	I	Red	16	69419962	F	NA	TERF2	NM_005652	TSS200	chr16:69419316-69420086	Island
cg05627078	-0.175749026	0.048218783	-3.644824987	0.000267574	-0.27	-0.081	0.047761141	I	Red	1	33592944	R	NA	NA	NA	NA	chr1:33592891-33593155	Island
cg05642873	-0.34680681	0.094035144	-3.688055294	0.000225975	-0.531	-0.163	0.045124921	I	Red	1	202858370	F	NA	RABIF	NM_002871	TSS200	chr1:202857683-202858394	Island
cg05654483	-0.283343539	0.074143706	-3.821545382	0.000132618	-0.429	-0.138	0.038710152	I	Red	10	122610929	F	rs35347156	WDR11;WDR11	NM_018117;NM_018117	5'UTR;1stExon	chr10:122610678-122611052	Island
cg05666571	-0.215390895	0.059329434	-3.630422203	0.000282958	-0.332	-0.099	0.048696512	I	Red	18	34409053	R	NA	C18orf10;KIAA1328;C18orf10	NM_015476;NM_020776;NM_015476	5'UTR;TSS200;1stExon	chr18:34408558-34409289	Island
cg05687210	-0.312611173	0.082354868	-3.795903987	0.000147106	-0.474	-0.151	0.039906594	I	Red	10	103347770	R	NA	POLL;RP11-529I10.4;POLL	NM_013274;NM_015448;NM_013274	5'UTR;TSS1500;1stExon	chr10:103347679-103348215	Island
cg05714748	1.093340448	0.24571585	4.449613033	8.60E-06	0.612	1.575	0.020877178	I	Red	17	80856238	F	rs11271370	TBCD	NM_005993	Body	chr17:80856874-80857352	N_Shore
cg05753046	0.218000193	0.05920497	3.682126562	0.000231297	0.102	0.334	0.045538216	I	Red	11	67801224	R	NA	NDUFS8	NM_002496	Body	chr11:67797802-67798413	S_Shelf
cg05786840	-0.458840508	0.11990934	-3.826561872	0.000129945	-0.694	-0.224	0.038626384	I	Red	1	228195377	R	NA	WNT3A	NM_033131	Body	chr1:228194096-228196512	Island
cg05787931	-0.470949627	0.118984642	-3.958070722	7.56E-05	-0.704	-0.238	0.033698302	I	Red	3	52232012	F	NA	ALAS1;ALAS1	NM_000688;NM_199166	TSS200;TSS200	chr3:52231942-52232541	Island
cg05788638	0.612391012	0.160692987	3.810938018	0.00013844	0.297	0.927	0.038987826	II	NA	14	94759020	R	NA	SERPINA10;SERPINA10;SERPINA10	NM_016186;NM_001100607;NM_016186	1stExon;5'UTR;5'UTR	NA	NA
cg05825928	0.303716209	0.07111482	4.270786414	1.95E-05	0.164	0.443	0.024436796	I	Red	11	68193809	R	NA	LRP5	NM_002335	Body	chr11:68192510-68192798	S_Shore
cg05827346	-0.621892161	0.148855456	-4.177825789	2.94E-05	-0.914	-0.33	0.028079913	I	Red	20	48732560	F	NA	UBE2V1;UBE2V1;TMEM189-UBE2V1;UBE2V1	NM_199144;NM_021988;NM_199203;NM_022442	TSS200;TSS200;Body;TSS200	chr20:48729268-48729798	S_Shelf
cg05842370	-0.33876763	0.087887659	-3.854552914	0.000115941	-0.511	-0.167	0.037627604	I	Red	22	41682224	F	NA	RANGAP1	NM_002883	TSS200	chr22:41681616-41682543	Island
cg05854695	-0.190934694	0.047403914	-4.02782552	5.63E-05	-0.284	-0.098	0.03165045	II	NA	4	122854336	F	NA	TRPC3;TRPC3	NM_001130698;NM_003305	Body;TSS200	chr4:122853554-122854169	S_Shore
cg05865860	-0.30892392	0.072804955	-4.243171645	2.20E-05	-0.452	-0.166	0.02554631	I	Grn	7	158649142	R	NA	WDR60	NM_018051	TSS200	chr7:158648984-158649759	Island
cg05876635	-0.192085259	0.051430322	-3.734864022	0.000187817	-0.293	-0.091	0.042895505	I	Grn	7	55955383	R	NA	NA	NA	NA	chr7:55954935-55955387	Island
cg05884394	-0.380938231	0.094167534	-4.045324474	5.23E-05	-0.566	-0.196	0.030897333	I	Red	7	89748671	R	NA	DPY19L2P4	NR_003551	TSS200	chr7:89747892-89749036	Island
cg05893876	-0.492275802	0.123848564	-3.974820432	7.04E-05	-0.735	-0.25	0.03294454	I	Red	8	120428507	F	NA	NOV	NM_002514	TSS200	chr8:120428398-120429178	Island
cg05893889	0.235303662	0.056977496	4.129764905	3.63E-05	0.124	0.347	0.029421726	I	Red	2	65432239	F	rs35856369	NA	NA	NA	NA	NA
cg05913684	0.47797656	0.124517173	3.838639654	0.000123718	0.234	0.722	0.038212771	I	Grn	19	710906	R	NA	PALM;PALM	NM_002579;NM_001040134	Body;Body	chr19:710822-711066	Island
cg05929132	-0.622931281	0.15321864	-4.065636402	4.79E-05	-0.923	-0.323	0.030242045	I	Grn	15	66586024	F	NA	DIS3L;DIS3L	NM_001143688;NM_133375	1stExon;5'UTR	chr15:66585767-66586494	Island
cg05933224	0.279858333	0.076700614	3.648710482	0.00026356	0.13	0.43	0.047428282	I	Grn	14	81609977	R	NA	TSHR	NM_000369	Body	NA	NA
cg05934196	-0.731046628	0.186769138	-3.914172521	9.07E-05	-1.097	-0.365	0.035165173	I	Grn	8	22925766	F	NA	TNFRSF10B;TNFRSF10B;TNFRSF10B	NM_147187;NR_027140;NM_003842	Body;Body;Body	chr8:22925655-22926912	Island
cg05944967	0.213390252	0.057599395	3.704730803	0.000211615	0.1	0.326	0.044547509	I	Grn	18	77166811	F	NA	NFATC1;NFATC1;NFATC1;NFATC1;NFATC1	NM_006162;NM_172388;NM_172389;NM_172387;NM_172390	Body;5'UTR;Body;Body;Body	chr18:77166704-77167043	Island
cg05968145	-0.231507933	0.063887238	-3.623696062	0.000290423	-0.357	-0.106	0.049016605	I	Red	15	96952712	R	NA	NA	NA	NA	chr15:96952547-96953085	Island
cg05980081	0.561085776	0.1491307	3.762376064	0.000168307	0.269	0.853	0.041542924	II	NA	15	64385876	R	NA	FAM96A;FAM96A	NM_001014812;NM_032231	1stExon;1stExon	chr15:64385875-64386322	Island
cg05983723	0.219476194	0.056449406	3.888015995	0.000101067	0.109	0.33	0.036181082	I	Grn	16	70432258	F	NA	ST3GAL2	NM_006927	Body	NA	NA
cg06010356	-0.593310795	0.141170842	-4.202785694	2.64E-05	-0.87	-0.317	0.027005342	I	Red	16	74847234	F	NA	NA	NA	NA	NA	NA
cg06010711	0.210263927	0.055201785	3.809005949	0.000139527	0.102	0.318	0.03917978	II	NA	2	80453645	R	NA	CTNNA2;CTNNA2	NM_004389;NM_001164883	Body;Body	NA	NA
cg06038409	-0.221524194	0.048468271	-4.570499166	4.87E-06	-0.317	-0.127	0.019595269	I	Red	2	27294836	R	NA	LOC100128731	NM_001134693	TSS1500	chr2:27294139-27294915	Island
cg06048662	0.320051045	0.085392795	3.747986522	0.00017826	0.153	0.487	0.04227347	I	Red	5	1216726	R	NA	SLC6A19	NM_001003841	Body	chr5:1216639-1217081	Island
cg06068179	0.162898003	0.036012245	4.523405995	6.09E-06	0.092	0.233	0.020026345	II	NA	4	7814047	R	NA	AFAP1;AFAP1	NM_198595;NM_001134647	Body;Body	NA	NA
cg06070291	-0.523658454	0.133203201	-3.931275303	8.45E-05	-0.785	-0.263	0.034796783	I	Red	15	44828899	R	NA	EIF3J	NM_003758	TSS1500	chr15:44828637-44829949	Island
cg06091566	-0.266152174	0.070094349	-3.797056063	0.000146425	-0.404	-0.129	0.039879222	I	Red	1	860621	R	NA	SAMD11	NM_152486	TSS1500	chr1:858970-861632	Island
cg06092265	-0.529404992	0.14317541	-3.697597166	0.00021765	-0.81	-0.249	0.044868229	I	Red	12	65219655	F	NA	NA	NA	NA	chr12:65218245-65219143	S_Shore
cg06110221	-0.630117652	0.159730996	-3.944867739	7.98E-05	-0.943	-0.317	0.03433307	I	Red	11	64257582	R	NA	NA	NA	NA	NA	NA
cg06123584	0.273526507	0.064394751	4.247652242	2.16E-05	0.147	0.4	0.025456663	I	Grn	6	10320036	F	NA	NA	NA	NA	chr6:10319681-10320045	Island
cg06127159	1.062604533	0.267801474	3.967881562	7.25E-05	0.538	1.587	0.033182459	I	Grn	15	44171783	R	NA	FRMD5;LOC728758	NM_032892;NR_003571	Body;TSS1500	NA	NA
cg06135480	-0.39418169	0.107032451	-3.6828241	0.000230664	-0.604	-0.184	0.045483044	I	Red	16	85644718	R	NA	KIAA0182	NM_001134473	TSS1500	chr16:85644947-85649027	N_Shore
cg06139166	0.365846584	0.0970998	3.767737763	0.000164734	0.176	0.556	0.041274702	I	Red	16	67440283	R	NA	ZDHHC1	NM_013304	Body	NA	NA
cg06177599	0.456036076	0.109607748	4.160618992	3.17E-05	0.241	0.671	0.028587614	I	Red	1	11898576	R	NA	CLCN6	NM_001286	Body	chr1:11898393-11898732	Island
cg06191580	0.377421887	0.104268362	3.619716265	0.000294926	0.173	0.582	0.049188294	I	Red	17	35870477	R	NA	DUSP14	NM_007026	5'UTR	chr17:35872722-35873026	N_Shelf
cg06242102	0.282707311	0.070611878	4.003679243	6.24E-05	0.144	0.421	0.032399883	I	Red	7	157561010	R	NA	PTPRN2;PTPRN2;PTPRN2	NM_002847;NM_130842;NM_130843	Body;Body;Body	chr7:157560974-157561195	Island
cg06265760	0.318166496	0.083366797	3.81646537	0.000135377	0.155	0.482	0.038960227	I	Red	17	709328	F	NA	NXN	NM_022463	Body	chr17:710581-710912	N_Shore
cg06291595	0.601212808	0.147041352	4.088732863	4.34E-05	0.313	0.889	0.029794831	II	NA	14	74960292	F	NA	NPC2;ISCA2	NM_006432;NM_194279	TSS1500;TSS200	chr14:74959680-74960907	Island
cg06296553	0.479199555	0.127251087	3.765779672	0.00016603	0.23	0.729	0.041380716	I	Red	12	124810874	F	NA	NCOR2;NCOR2	NM_006312;NM_001077261	Body;Body	chr12:124810739-124810977	Island
cg06303282	-0.30965615	0.074207149	-4.172861419	3.01E-05	-0.455	-0.164	0.028253511	I	Red	4	154266565	R	NA	MND1	NM_032117	Body	chr4:154265607-154266394	S_Shore
cg06312785	-0.169159956	0.044885163	-3.768727635	0.000164082	-0.257	-0.081	0.041274702	I	Grn	3	135685131	R	NA	PPP2R3A	NM_002718	5'UTR	chr3:135684570-135685367	Island
cg06314184	0.302244486	0.070261339	4.301718253	1.69E-05	0.165	0.44	0.024222597	I	Red	7	4876143	R	NA	RADIL	NM_018059	Body	chr7:4876024-4876229	Island
cg06322639	0.270351736	0.072306966	3.738944548	0.000184794	0.129	0.412	0.042622298	I	Red	15	80883928	R	NA	ARNT2	NM_014862	Body	NA	NA
cg06353614	0.75216081	0.189559834	3.967933475	7.25E-05	0.381	1.124	0.033182459	II	NA	1	201083479	R	NA	NA	NA	NA	chr1:201083458-201084567	Island
cg06372145	0.297491872	0.077964977	3.815711666	0.000135791	0.145	0.45	0.038960227	II	NA	20	29979846	F	NA	DEFB119;DEFB119;DEFB119	NM_173460;NM_153289;NM_153323	TSS1500;TSS1500;TSS1500	NA	NA
cg06406294	-0.237236194	0.063425738	-3.740377326	0.000183744	-0.362	-0.113	0.04260355	I	Red	21	34915161	R	NA	GART;SON;GART;GART;GART;GART;GART;SON	NM_001136005;NM_138927;NM_175085;NM_001136006;NM_001136005;NM_001136006;NM_000819;NM_032195	1stExon;TSS200;TSS1500;1stExon;5'UTR;5'UTR;TSS1500;TSS200	chr21:34914303-34915906	Island
cg06431105	0.197520435	0.054529393	3.622274608	0.000292024	0.091	0.304	0.049062216	I	Grn	19	18572378	F	NA	ELL	NM_006532	Body	chr19:18572408-18572619	N_Shore
cg06431905	-0.262187268	0.070458903	-3.721137516	0.000198327	-0.4	-0.124	0.043498886	I	Grn	5	148931119	F	NA	CSNK1A1;CSNK1A1	NM_001025105;NM_001892	TSS200;TSS200	chr5:148930249-148931244	Island
cg06450634	0.931041046	0.216018098	4.310014086	1.63E-05	0.508	1.354	0.024222597	I	Red	16	30430044	F	NA	NA	NA	NA	chr16:30428870-30429799	S_Shore
cg06452642	-0.585250564	0.154278636	-3.793464722	0.00014856	-0.888	-0.283	0.040085681	I	Grn	19	13875641	F	NA	MRI1;MRI1	NM_001031727;NM_032285	Body;Body	chr19:13875044-13875951	Island
cg06463913	-0.439826828	0.115008743	-3.824290384	0.000131149	-0.665	-0.214	0.038688508	I	Grn	11	207296	F	NA	BET1L;BET1L;RIC8A	NM_001098787;NM_016526;NM_021932	Body;Body;TSS1500	chr11:206975-209225	Island
cg06466203	-0.567681396	0.140432675	-4.042374011	5.29E-05	-0.843	-0.292	0.03109382	I	Grn	10	89623360	R	NA	PTEN;KILLIN;PTEN	NM_000314;NM_001126049;NM_000314	5'UTR;TSS200;1stExon	chr10:89621772-89624128	Island
cg06466782	0.167752337	0.045638596	3.675668221	0.000237228	0.078	0.257	0.045912367	I	Red	7	101049300	R	NA	EMID2	NM_133457	Body	NA	NA
cg06476903	-0.163910461	0.043580427	-3.76110266	0.000169166	-0.249	-0.078	0.041598872	I	Red	19	38806779	R	NA	YIF1B;YIF1B;YIF1B;YIF1B;YIF1B;YIF1B	NM_001039673;NM_001145462;NM_001039671;NM_001145463;NM_001145461;NM_001039672	TSS200;TSS1500;TSS1500;TSS200;TSS1500;TSS200	chr19:38806485-38806747	S_Shore
cg06507434	0.423240923	0.108449475	3.902655335	9.51E-05	0.211	0.636	0.035587932	I	Red	11	64597280	F	NA	CDC42BPG	NM_017525	Body	chr11:64596975-64597519	Island
cg06521472	0.420056673	0.107677104	3.90107698	9.58E-05	0.209	0.631	0.035655975	I	Red	16	88990232	R	NA	CBFA2T3;CBFA2T3	NM_175931;NM_005187	5'UTR;Body	chr16:88994137-88994442	N_Shelf
cg06529840	1.01185197	0.27885831	3.628552322	0.000285015	0.465	1.558	0.048713332	II	NA	13	113580673	F	rs35256230	NA	NA	NA	NA	NA
cg06533788	0.296064348	0.077858706	3.802585004	0.000143194	0.143	0.449	0.039411825	I	Red	2	240312860	F	NA	HDAC4	NM_006037	5'UTR	NA	NA
cg06556795	0.259465037	0.070783839	3.665597138	0.000246762	0.121	0.398	0.046554765	II	NA	1	48449120	R	NA	NA	NA	NA	chr1:48449870-48450144	N_Shore
cg06562372	-0.515620585	0.118743906	-4.342290905	1.41E-05	-0.748	-0.283	0.024222597	I	Red	7	87230196	R	NA	ABCB1	NM_000927	5'UTR	chr7:87230059-87230260	Island
cg06566534	-0.336272846	0.07290479	-4.612493177	3.98E-06	-0.479	-0.193	0.019595269	I	Red	5	140019089	R	NA	TMCO6;TMCO6	NM_018502;NM_018502	5'UTR;1stExon	chr5:140019034-140019502	Island
cg06599939	0.264967482	0.072791231	3.64010169	0.00027253	0.122	0.408	0.047958301	I	Red	16	1590085	R	NA	IFT140;TMEM204	NM_014714;NM_024600	Body;Body	chr16:1591813-1592107	N_Shore
cg06610849	-0.270576622	0.073142622	-3.699301653	0.000216194	-0.414	-0.127	0.044762902	I	Red	19	58520847	R	NA	NA	NA	NA	chr19:58520754-58521224	Island
cg06642093	-0.37395405	0.09828462	-3.804807392	0.000141915	-0.567	-0.181	0.039368142	I	Grn	7	104653910	F	NA	MLL5;LOC100216545;MLL5	NM_182931;NR_024586;NM_018682	TSS1500;Body;TSS1500	chr7:104653119-104654966	Island
cg06644655	0.107940225	0.029919917	3.607637908	0.000308997	0.049	0.167	0.049924093	I	Grn	13	112333521	R	NA	NA	NA	NA	NA	NA
cg06646646	0.618686606	0.159234804	3.885372983	0.000102173	0.307	0.931	0.036342456	I	Red	16	1815154	F	NA	MAPK8IP3;MAPK8IP3	NM_001040439;NM_015133	Body;Body	chr16:1814084-1814482	S_Shore
cg06651450	0.603161117	0.151122155	3.9912157	6.57E-05	0.307	0.899	0.032754148	I	Grn	3	32860909	F	NA	TRIM71	NM_001039111	Body	chr3:32861141-32861429	N_Shore
cg06652850	-0.55475347	0.135680564	-4.088673068	4.34E-05	-0.821	-0.289	0.029794831	I	Red	7	107384126	R	NA	CBLL1;CBLL1	NM_024814;NR_024199	TSS200;TSS200	chr7:107383657-107385021	Island
cg06654691	-0.536848019	0.106900372	-5.021947163	5.12E-07	-0.746	-0.327	0.015521289	I	Red	17	40825980	R	NA	PLEKHH3	NM_024927	Body	chr17:40827975-40828659	N_Shore
cg06660522	-0.170413946	0.045331045	-3.759320902	0.000170375	-0.259	-0.082	0.041693145	II	NA	1	211725112	F	NA	NA	NA	NA	NA	NA
cg06668034	-0.284579041	0.072821417	-3.90790312	9.31E-05	-0.427	-0.142	0.0355295	I	Red	3	47018194	F	rs936181	CCDC12	NM_144716	1stExon	chr3:47017879-47018312	Island
cg06683021	-0.246923814	0.06817301	-3.622017186	0.000292315	-0.381	-0.113	0.049074099	I	Red	4	9475346	F	NA	NA	NA	NA	NA	NA
cg06697471	0.25814298	0.070771826	3.64753879	0.000264764	0.119	0.397	0.047554743	I	Red	10	133606998	F	NA	NA	NA	NA	NA	NA
cg06698638	0.717473119	0.196373616	3.653612616	0.000258576	0.333	1.102	0.047037054	II	NA	7	155622874	F	rs75868242	NA	NA	NA	chr7:155623658-155623894	N_Shore
cg06713968	0.400427044	0.103851116	3.8557799	0.000115361	0.197	0.604	0.037539726	II	NA	2	47089970	R	NA	NA	NA	NA	NA	NA
cg06715805	0.402327937	0.098050411	4.103276399	4.07E-05	0.21	0.595	0.029421726	I	Red	16	1414718	R	NA	UNKL	NM_023076	3'UTR	chr16:1414417-1414851	Island
cg06716686	-0.387581271	0.098383102	-3.939510599	8.16E-05	-0.58	-0.195	0.034533653	I	Red	3	4535154	F	rs41276527	ITPR1;ITPR1;ITPR1;ITPR1;ITPR1;ITPR1	NM_002222;NM_002222;NM_001168272;NM_001099952;NM_001099952;NM_001168272	1stExon;5'UTR;1stExon;1stExon;5'UTR;5'UTR	chr3:4534412-4535367	Island
cg06720713	0.35999642	0.090806192	3.96444795	7.36E-05	0.182	0.538	0.033313339	I	Red	13	114059522	R	NA	NA	NA	NA	chr13:114056100-114056577	S_Shelf
cg06720949	0.432184567	0.118086224	3.659906745	0.000252307	0.201	0.664	0.046737162	I	Red	19	45381937	F	NA	PVRL2;PVRL2	NM_001042724;NM_002856	Body;3'UTR	NA	NA
cg06725035	0.432076617	0.106663415	4.050841759	5.10E-05	0.223	0.641	0.030551763	II	NA	21	48055212	R	NA	PRMT2;PRMT2	NM_206962;NM_001535	TSS1500;TSS1500	chr21:48055199-48056060	Island
cg06725760	-0.401315438	0.104354523	-3.845692784	0.000120212	-0.606	-0.197	0.037921489	I	Red	10	1102461	F	NA	WDR37	NM_014023	TSS1500	chr10:1102144-1103341	Island
cg06728437	-0.194350082	0.052594428	-3.695259934	0.000219662	-0.297	-0.091	0.044936151	I	Red	2	208031766	R	NA	KLF7	NM_003709	TSS1500	chr2:208030852-208031477	S_Shore
cg06730555	-0.297255283	0.068757138	-4.323264353	1.54E-05	-0.432	-0.162	0.024222597	I	Red	14	21852428	F	NA	SUPT16H	NM_007192	TSS200	chr14:21851498-21852550	Island
cg06747288	0.757231062	0.179942744	4.208177812	2.57E-05	0.405	1.11	0.026726295	II	NA	1	31247617	R	NA	NA	NA	NA	chr1:31246010-31246280	S_Shore
cg06747916	-0.190522389	0.047526023	-4.008801389	6.10E-05	-0.284	-0.097	0.032349334	I	Red	17	57784835	R	NA	TMEM49;PTRH2;PTRH2	NM_030938;NM_016077;NM_016077	TSS200;5'UTR;1stExon	chr17:57784754-57785108	Island
cg06753869	-0.494356317	0.122440814	-4.037512506	5.40E-05	-0.734	-0.254	0.031107885	I	Grn	6	24667316	R	NA	ACOT13;TTRAP;ACOT13;ACOT13;ACOT13	NM_018473;NM_016614;NM_001160094;NM_001160094;NM_018473	5'UTR;TSS1500;1stExon;5'UTR;1stExon	chr6:24666538-24667395	Island
cg06755612	-0.230839816	0.061055548	-3.780816378	0.000156315	-0.351	-0.111	0.040519369	I	Red	14	45603778	R	NA	FKBP3;FANCM	NM_002013;NM_020937	TSS200;TSS1500	chr14:45603373-45603906	Island
cg06758143	-0.220537353	0.059723283	-3.692652887	0.000221927	-0.338	-0.103	0.045061793	I	Red	1	26798177	R	NA	HMGN2	NM_005517	TSS1500	chr1:26798366-26799842	N_Shore
cg06758649	-0.352511434	0.085176729	-4.138588552	3.49E-05	-0.519	-0.186	0.029201666	I	Red	12	107381105	R	NA	MTERFD3;MTERFD3	NM_001033050;NM_025198	TSS200;TSS200	chr12:107380558-107381076	S_Shore
cg06767142	0.255561868	0.066779528	3.826949328	0.000129741	0.125	0.386	0.038626384	I	Red	11	63821400	F	NA	MACROD1	NM_014067	Body	NA	NA
cg06773604	0.353060204	0.078065804	4.5225974	6.11E-06	0.2	0.506	0.020026345	II	NA	16	18995157	R	NA	TMC7;TMC7	NM_001160364;NM_024847	TSS1500;TSS200	chr16:18995156-18995577	Island
cg06774087	0.315986576	0.086698935	3.644641966	0.000267764	0.146	0.486	0.047777575	II	NA	5	79647614	R	NA	LOC441089	NR_003665	Body	NA	NA
cg06785999	-0.226081435	0.060184398	-3.756479144	0.000172321	-0.344	-0.108	0.041904669	I	Red	14	60975964	F	NA	SIX6;SIX6	NM_007374;NM_007374	1stExon;5'UTR	chr14:60975732-60978180	Island
cg06791473	-0.232138903	0.061725288	-3.760839548	0.000169344	-0.353	-0.111	0.041598872	I	Red	12	49259579	R	NA	RND1;RND1	NM_014470;NM_014470	5'UTR;1stExon	NA	NA
cg06798491	-0.395310011	0.09712387	-4.070163292	4.70E-05	-0.586	-0.205	0.030242045	I	Red	11	62538386	F	NA	TAF6L	NM_006473	TSS1500	chr11:62539001-62539322	N_Shore
cg06821919	-0.436738215	0.109251037	-3.997565844	6.40E-05	-0.651	-0.223	0.032587381	I	Red	20	16710653	R	NA	SNRPB2;SNRPB2;SNRPB2;SNRPB2	NM_198220;NM_198220;NM_003092;NM_003092	5'UTR;1stExon;5'UTR;1stExon	chr20:16710507-16711115	Island
cg06828538	0.370872481	0.100437807	3.692558535	0.000222009	0.174	0.568	0.045061793	II	NA	7	5463627	F	NA	TNRC18	NM_001080495	TSS1500	chr7:5458503-5469256	Island
cg06844159	0.472656107	0.12935231	3.654021375	0.000258165	0.219	0.726	0.047018132	II	NA	11	70374355	R	NA	SHANK2;SHANK2	NM_012309;NM_133266	Body;Body	NA	NA
cg06851844	0.400181171	0.097043564	4.12372707	3.73E-05	0.21	0.59	0.029421726	I	Red	2	46707844	R	NA	LOC388946	NM_001145051	Body	chr2:46707608-46707899	Island
cg06855379	0.371959549	0.093920896	3.960349219	7.48E-05	0.188	0.556	0.033551092	I	Red	3	49699923	F	NA	BSN	NM_003458	Body	NA	NA
cg06866400	-0.203023775	0.053937491	-3.764056749	0.000167179	-0.309	-0.097	0.041454224	I	Red	6	143771904	R	NA	ADAT2;PEX3	NM_182503;NM_003630	TSS200;TSS200	chr6:143771610-143772084	Island
cg06874218	-0.294213994	0.080781525	-3.642095061	0.000270428	-0.453	-0.136	0.047837573	I	Red	18	3447454	F	NA	TGIF1;TGIF1	NM_174886;NM_173207	5'UTR;TSS200	chr18:3448006-3452360	N_Shore
cg06894464	0.253898256	0.057166953	4.441346678	8.94E-06	0.142	0.366	0.020877178	I	Red	14	100406457	R	NA	EML1;EML1	NM_001008707;NM_004434	3'UTR;3'UTR	NA	NA
cg06902609	0.238402781	0.061911499	3.850702769	0.000117779	0.117	0.36	0.037707725	I	Red	7	985719	F	rs80116805	ADAP1	NM_006869	Body	chr7:985613-985913	Island
cg06905970	-0.268632998	0.068968579	-3.895005532	9.82E-05	-0.404	-0.133	0.03579364	I	Red	19	41222748	F	NA	ADCK4;ADCK4;ITPKC	NM_024876;NM_024876;NM_025194	1stExon;5'UTR;TSS1500	chr19:41222598-41223162	Island
cg06914050	-0.348755881	0.086685228	-4.023244651	5.74E-05	-0.519	-0.179	0.031685944	I	Red	7	56119237	F	NA	PSPH;PSPH;CCT6A;CCT6A	NM_004577;NM_004577;NM_001009186;NM_001762	5'UTR;1stExon;TSS200;TSS200	chr7:56119045-56119963	Island
cg06917231	-0.263271155	0.072338917	-3.63941247	0.000273261	-0.405	-0.121	0.047959033	I	Grn	6	28234854	F	NA	ZNF187;ZNF187;ZNF187;ZNF187;ZNF187;ZNF187	NM_001023560;NM_001111039;NM_001111039;NM_152736;NM_152736;NM_001023560	5'UTR;1stExon;5'UTR;5'UTR;1stExon;1stExon	chr6:28234842-28235124	Island
cg06917548	0.261694153	0.069940624	3.7416617	0.000182807	0.125	0.399	0.042598101	I	Red	19	16643283	F	NA	CHERP	NM_006387	Body	chr19:16643273-16643599	Island
cg06921011	-0.733027658	0.186413211	-3.932273113	8.41E-05	-1.098	-0.368	0.034796783	I	Red	10	102589467	R	NA	PAX2;PAX2;PAX2;PAX2;PAX2	NM_003988;NM_000278;NM_003990;NM_003989;NM_003987	3'UTR;3'UTR;3'UTR;3'UTR;3'UTR	chr10:102590122-102590402	N_Shore
cg06936355	0.866003486	0.173358338	4.995453327	5.87E-07	0.526	1.206	0.015694406	II	NA	9	99213110	F	NA	HABP4	NM_014282	Body	chr9:99212164-99213507	Island
cg06938699	0.374709077	0.099807325	3.754324431	0.00017381	0.179	0.57	0.041926963	I	Red	11	1037775	F	NA	MUC6	NM_005961	TSS1500	chr11:1036420-1036827	S_Shore
cg06966242	0.267854436	0.070057791	3.823335482	0.000131658	0.131	0.405	0.038693558	I	Red	1	4832432	F	NA	AJAP1;AJAP1	NM_018836;NM_001042478	Body;Body	chr1:4832351-4832553	Island
cg06981541	0.350395049	0.095321309	3.675936194	0.000236979	0.164	0.537	0.045912367	I	Grn	7	155797634	F	NA	NA	NA	NA	NA	NA
cg06992285	-0.355325081	0.09164457	-3.877208225	0.000105662	-0.535	-0.176	0.036634949	I	Red	8	99952047	R	NA	NA	NA	NA	chr8:99952020-99954686	Island
cg06996129	-0.577155056	0.136605992	-4.224961481	2.39E-05	-0.845	-0.309	0.025998984	I	Grn	11	16627962	F	NA	NA	NA	NA	chr11:16626053-16629180	Island
cg07002622	0.505196276	0.121979886	4.141635922	3.45E-05	0.266	0.744	0.029154396	I	Grn	6	118822466	F	NA	C6orf204;BRD7P3;C6orf204	NM_206921;NR_002730;NM_001042475	Body;TSS200;Body	NA	NA
cg07011357	-0.181004483	0.048123723	-3.761231914	0.000169079	-0.275	-0.087	0.041598872	I	Red	1	92949813	F	NA	GFI1;GFI1;GFI1	NM_001127216;NM_005263;NM_001127215	5'UTR;5'UTR;TSS1500	chr1:92945907-92952609	Island
cg07013326	-0.425089505	0.098832928	-4.30109187	1.70E-05	-0.619	-0.231	0.024222597	I	Grn	6	57037090	R	NA	BAG2	NM_004282	TSS200	chr6:57036954-57037731	Island
cg07017901	-0.244718415	0.059998441	-4.078746251	4.53E-05	-0.362	-0.127	0.03003225	I	Red	12	5541270	R	NA	NTF3	NM_001102654	TSS200	chr12:5541210-5542973	Island
cg07052986	-0.352768417	0.085950113	-4.104339177	4.05E-05	-0.521	-0.184	0.029421726	I	Red	6	170863483	R	NA	PSMB1;TBP;TBP	NM_002793;NM_003194;NM_003194	TSS1500;5'UTR;1stExon	chr6:170863398-170863823	Island
cg07067085	-0.26199777	0.063597613	-4.119616389	3.80E-05	-0.387	-0.137	0.029421726	I	Grn	12	120638762	F	NA	RPLP0;RPLP0	NM_053275;NM_001002	5'UTR;5'UTR	chr12:120638588-120639116	Island
cg07081352	-0.398518641	0.103204416	-3.861449496	0.000112716	-0.601	-0.196	0.03735502	I	Red	7	143077477	F	NA	ZYX;ZYX	NM_001010972;NM_003461	TSS1500;TSS1500	chr7:143077469-143079169	Island
cg07086847	-0.63583831	0.173100136	-3.673239816	0.000239495	-0.975	-0.297	0.04603225	I	Grn	8	145550618	R	NA	DGAT1	NM_012079	TSS200	chr8:145549984-145551217	Island
cg07095337	0.680588849	0.152193212	4.471873889	7.75E-06	0.382	0.979	0.020877178	I	Red	10	134621275	F	NA	NA	NA	NA	chr10:134621072-134621372	Island
cg07097725	0.478742454	0.131198964	3.648980453	0.000263283	0.222	0.736	0.047428282	I	Grn	10	6162727	F	rs74391212	NA	NA	NA	NA	NA
cg07132223	0.578796324	0.137055103	4.223092092	2.41E-05	0.31	0.847	0.025998984	I	Red	12	58003385	F	NA	DTX3;GEFT	NM_178502;NM_001111270	3'UTR;TSS1500	chr12:58003880-58004249	N_Shore
cg07136949	0.302068591	0.079916697	3.779793214	0.000156959	0.145	0.459	0.040556313	I	Grn	6	7986672	F	NA	MGC26597	NR_027712	Body	chr6:7986333-7986847	Island
cg07138366	0.114622554	0.028849828	3.973075842	7.10E-05	0.058	0.171	0.033027126	I	Red	3	186075879	F	NA	DGKG;DGKG;DGKG	NM_001346;NM_001080744;NM_001080745	5'UTR;5'UTR;5'UTR	chr3:186078710-186080111	N_Shelf
cg07141622	-0.501261384	0.13597003	-3.686557865	0.000227308	-0.768	-0.235	0.045246176	I	Grn	14	70193793	F	rs35163382	NA	NA	NA	chr14:70193467-70193955	Island
cg07144318	0.665541444	0.176586813	3.768919288	0.000163956	0.319	1.012	0.041266227	I	Grn	2	129301519	F	NA	NA	NA	NA	NA	NA
cg07148914	0.538145236	0.145601	3.696027066	0.000219	0.253	0.824	0.044929537	II	NA	20	33460835	R	NA	GGT7	NM_178026	TSS200	chr20:33460430-33460866	Island
cg07153501	-0.231528274	0.059451015	-3.894437684	9.84E-05	-0.348	-0.115	0.035807825	I	Red	2	172864976	R	NA	MAP1D	NM_199227	Body	chr2:172864613-172865064	Island
cg07156929	-0.707314603	0.182031182	-3.885678239	0.000102045	-1.064	-0.351	0.036342456	I	Red	6	34856927	F	NA	ANKS1A;TAF11	NM_015245;NM_005643	TSS200;TSS1500	chr6:34856826-34857664	Island
cg07164791	0.312795339	0.080320166	3.894356235	9.85E-05	0.155	0.47	0.035807825	I	Red	10	134885969	R	NA	NA	NA	NA	chr10:134884426-134884646	S_Shore
cg07165529	0.279775552	0.077522694	3.60895034	0.000307438	0.128	0.432	0.049814664	I	Red	18	74805219	R	NA	MBP;MBP	NM_001025100;NM_001025101	Body;Body	chr18:74804127-74804460	S_Shore
cg07171518	0.188168642	0.051399868	3.660877885	0.000251353	0.087	0.289	0.046649341	II	NA	9	119976922	R	NA	ASTN2;ASTN2;ASTN2	NM_198186;NM_014010;NM_198187	Body;Body;Body	chr9:119976797-119977010	Island
cg07182965	-0.225541303	0.053170396	-4.241858653	2.22E-05	-0.33	-0.121	0.025564489	I	Grn	18	71815169	F	rs3813110	FBXO15;FBXO15;C18orf55	NM_152676;NM_001142958;NM_014177	TSS200;TSS200;TSS1500	chr18:71814555-71815716	Island
cg07198365	0.29063847	0.070953139	4.096203119	4.20E-05	0.152	0.43	0.029423672	I	Grn	10	3572665	F	NA	NA	NA	NA	NA	NA
cg07199999	-0.300269679	0.073930982	-4.061486432	4.88E-05	-0.445	-0.155	0.030242045	I	Red	14	59951554	R	NA	C14orf149;JKAMP;JKAMP	NM_144581;NM_001098625;NM_016475	TSS1500;Body;Body	chr14:59950460-59951527	S_Shore
cg07202479	1.298116143	0.252288748	5.145358854	2.67E-07	0.804	1.793	0.014683708	I	Red	1	159174162	R	NA	DARC;DARC	NM_001122951;NM_002036	TSS1500;TSS1500	NA	NA
cg07209765	0.436267922	0.115897754	3.764248304	0.000167051	0.209	0.663	0.041454224	I	Red	1	47985223	F	NA	NA	NA	NA	NA	NA
cg07225598	0.482829434	0.113510312	4.253617373	2.10E-05	0.26	0.705	0.025092096	II	NA	1	228646916	R	NA	HIST3H2A	NM_033445	TSS1500	chr1:228645196-228646434	S_Shore
cg07226281	-0.276498579	0.076402422	-3.618976624	0.00029577	-0.426	-0.127	0.049188294	I	Red	16	1756622	R	NA	MAPK8IP3;MAPK8IP3	NM_015133;NM_001040439	1stExon;1stExon	NA	NA
cg07234439	0.41463922	0.097062938	4.27185935	1.94E-05	0.224	0.605	0.024382492	I	Grn	9	110479374	R	NA	NA	NA	NA	chr9:110479034-110479420	Island
cg07264904	0.401632191	0.098833914	4.063708248	4.83E-05	0.208	0.595	0.030242045	I	Red	13	113633855	F	rs7987670	MCF2L;MCF2L;MCF2L	NM_001112732;NM_024979;NM_024979	Body;5'UTR;1stExon	chr13:113633843-113634065	Island
cg07274194	-0.376919434	0.102720986	-3.669351801	0.000243166	-0.578	-0.176	0.046423493	I	Grn	6	43423442	F	rs3734686	DLK2;DLK2	NM_206539;NM_023932	5'UTR;TSS200	chr6:43422368-43423705	Island
cg07274998	-0.390560578	0.108160984	-3.610919231	0.000305114	-0.603	-0.179	0.049626919	I	Red	10	126107781	R	NA	OAT	NM_000274	TSS1500	chr10:126106818-126107862	Island
cg07296447	0.432924814	0.105284655	4.111945971	3.92E-05	0.227	0.639	0.029421726	II	NA	7	1286023	R	NA	NA	NA	NA	chr7:1286022-1287658	Island
cg07301105	0.632246604	0.171197851	3.693075592	0.000221558	0.297	0.968	0.045026844	II	NA	2	232379665	F	rs12464121	C2orf52	NR_024079	TSS1500	chr2:232378948-232379666	Island
cg07331747	-0.341776781	0.090702374	-3.76811284	0.000164486	-0.52	-0.164	0.041274702	I	Red	5	172410821	R	NA	ATP6V0E1;ATP6V0E1	NM_003945;NM_003945	5'UTR;1stExon	chr5:172410691-172411161	Island
cg07352245	-0.15054336	0.039747473	-3.787495086	0.000152174	-0.228	-0.073	0.040320458	I	Red	5	179125837	R	NA	CANX;CANX	NM_001746;NM_001024649	TSS200;TSS200	chr5:179125341-179126340	Island
cg07352798	-0.430790383	0.111647786	-3.858476727	0.000114096	-0.65	-0.212	0.037403743	I	Red	5	141488591	F	NA	NDFIP1	NM_030571	1stExon	chr5:141488316-141488919	Island
cg07364526	-0.517217686	0.132173512	-3.913172012	9.11E-05	-0.776	-0.258	0.035165173	I	Red	6	28105036	R	NA	NA	NA	NA	chr6:28104781-28105240	Island
cg07368661	0.4989209	0.128020476	3.897196086	9.73E-05	0.248	0.75	0.035711674	I	Red	17	73506203	F	NA	CASKIN2;CASKIN2	NM_001142643;NM_020753	TSS1500;Body	NA	NA
cg07398558	0.330318755	0.091273094	3.619015626	0.000295726	0.151	0.509	0.049188294	II	NA	1	28879201	F	NA	TRNAU1AP;TRNAU1AP	NR_003109;NM_017846	TSS1500;TSS1500	chr1:28879402-28879704	N_Shore
cg07405426	-0.366264299	0.083132519	-4.405788548	1.05E-05	-0.529	-0.203	0.021773311	I	Red	16	30825646	R	NA	NA	NA	NA	chr16:30825528-30825978	Island
cg07420135	-0.35702775	0.095424526	-3.741467382	0.000182949	-0.544	-0.17	0.042598101	I	Grn	12	49525438	R	NA	TUBA1B	NM_006082	TSS200	chr12:49524072-49525492	Island
cg07429394	0.64548953	0.158867101	4.063078673	4.84E-05	0.334	0.957	0.030242045	II	NA	1	153918709	R	NA	DENND4B	NM_014856	5'UTR	chr1:153918372-153919334	Island
cg07433453	0.64441173	0.175999562	3.661439391	0.000250802	0.299	0.989	0.046618483	II	NA	7	1097027	F	NA	C7orf50;C7orf50;GPR146;C7orf50	NM_001134395;NM_032350;NM_138445;NM_001134396	Body;Body;TSS200;Body	chr7:1097405-1097953	N_Shore
cg07434447	-0.226221018	0.060612239	-3.732266291	0.000189765	-0.345	-0.107	0.04305582	I	Red	7	74489725	R	NA	WBSCR16	NM_030798	TSS200	chr7:74489353-74489930	Island
cg07445838	0.152195583	0.041900279	3.632328647	0.000280875	0.07	0.234	0.048642645	I	Red	4	74962195	F	NA	NA	NA	NA	chr4:74964656-74965279	N_Shelf
cg07461160	-0.286892104	0.079440851	-3.611392631	0.000304557	-0.443	-0.131	0.049602872	I	Red	19	16435233	F	rs12459387	KLF2	NM_016270	TSS1500	chr19:16435202-16438064	Island
cg07464605	0.530609775	0.115451041	4.595972217	4.31E-06	0.304	0.757	0.019595269	I	Red	10	18940606	F	rs77596480	NSUN6	NM_182543	TSS200	chr10:18940528-18940765	Island
cg07466230	0.457051008	0.10326759	4.425890133	9.60E-06	0.255	0.659	0.021276	I	Red	8	893583	R	NA	NA	NA	NA	chr8:893459-893760	Island
cg07473634	0.3577125	0.083968756	4.260066674	2.04E-05	0.193	0.522	0.02478885	I	Red	13	113647389	F	NA	MCF2L;MCF2L	NM_001112732;NM_024979	Body;Body	chr13:113648343-113649601	N_Shore
cg07477867	0.193274388	0.046679536	4.140452247	3.47E-05	0.102	0.285	0.029154396	I	Red	16	71604018	F	rs13339247	TAT	NM_000353	Body	NA	NA
cg07479253	0.269741401	0.064007001	4.214248361	2.51E-05	0.144	0.395	0.026451052	II	NA	3	111904892	R	NA	SLC9A10	NM_183061	Body	chr3:111904382-111904845	S_Shore
cg07484567	0.420480104	0.096247319	4.368746149	1.25E-05	0.232	0.609	0.02323787	I	Red	16	84087087	R	NA	NA	NA	NA	chr16:84085866-84086115	S_Shore
cg07495755	0.776594282	0.212467587	3.655118855	0.000257063	0.36	1.193	0.04697294	I	Red	18	77562351	F	NA	NA	NA	NA	chr18:77562287-77562501	Island
cg07496882	-0.788719842	0.19225741	-4.102415832	4.09E-05	-1.166	-0.412	0.029421726	I	Red	10	112631570	F	NA	LOC282997;PDCD4;PDCD4	NR_026932;NM_014456;NM_145341	TSS1500;TSS200;TSS200	chr10:112631414-112632476	Island
cg07504373	-0.226240809	0.062196927	-3.637491757	0.000275306	-0.348	-0.104	0.048127772	I	Red	19	45682841	R	NA	BLOC1S3;TRAPPC6A	NM_212550;NM_024108	Body;TSS1500	chr19:45681323-45683156	Island
cg07509252	0.180773982	0.046645075	3.875521288	0.000106397	0.089	0.272	0.036636073	I	Grn	16	88725730	F	rs79616778	MVD	NM_002461	Body	chr16:88725583-88725836	Island
cg07514159	0.748035801	0.177015072	4.225831126	2.38E-05	0.401	1.095	0.025998984	I	Grn	10	80982257	R	NA	ZMIZ1	NM_020338	Body	NA	NA
cg07518170	-0.262875847	0.065789578	-3.995706514	6.45E-05	-0.392	-0.134	0.032655163	I	Red	20	30865285	F	NA	KIF3B	NM_004798	TSS200	chr20:30865547-30865791	N_Shore
cg07521668	0.324515412	0.084623447	3.834816752	0.000125658	0.159	0.49	0.038321768	I	Red	11	63799381	R	NA	MACROD1	NM_014067	Body	chr11:63803375-63804365	N_Shelf
cg07552157	-0.26602662	0.053453569	-4.976779349	6.47E-07	-0.371	-0.161	0.015694406	I	Red	3	142720316	R	NA	SR140	NM_001080415	TSS200	chr3:142720236-142720759	Island
cg07557424	0.913898566	0.236853845	3.858491578	0.000114089	0.45	1.378	0.037403743	II	NA	9	34613043	R	NA	C9orf23;C9orf23	NM_148178;NM_148179	TSS1500;TSS1500	chr9:34611950-34612641	S_Shore
cg07581739	0.465966834	0.126008771	3.69789205	0.000217397	0.219	0.713	0.044862218	I	Grn	5	1232437	F	NA	SLC6A18	NM_182632	Body	chr5:1232352-1232594	Island
cg07602317	0.373746518	0.088256637	4.234769514	2.29E-05	0.201	0.547	0.025746424	I	Grn	11	2210191	R	NA	NA	NA	NA	NA	NA
cg07643726	-0.660044899	0.149331449	-4.419999281	9.87E-06	-0.953	-0.367	0.021393139	I	Red	19	37178411	R	NA	NA	NA	NA	chr19:37178104-37178589	Island
cg07643829	0.688377409	0.17239375	3.993053173	6.52E-05	0.35	1.026	0.032748156	I	Grn	16	2757806	F	NA	KCTD5	NM_018992	3'UTR	chr16:2757535-2757911	Island
cg07644571	-0.309856018	0.072175941	-4.293065149	1.76E-05	-0.451	-0.168	0.024222597	I	Red	22	22307395	R	NA	PPM1F	NM_014634	TSS200	chr22:22306554-22307402	Island
cg07655948	-0.378871339	0.103943164	-3.644985613	0.000267407	-0.583	-0.175	0.047748875	I	Red	20	56725899	F	NA	C20orf85	NM_178456	TSS200	chr20:56725857-56726113	Island
cg07655965	0.546610778	0.136990665	3.990131579	6.60E-05	0.278	0.815	0.032754148	II	NA	2	27255524	F	NA	TMEM214;TMEM214	NM_017727;NM_001083590	TSS1500;TSS1500	chr2:27255600-27256121	N_Shore
cg07661849	0.669016359	0.153905843	4.346919812	1.38E-05	0.367	0.971	0.024222597	II	NA	4	146686236	R	NA	ZNF827	NM_178835	Body	chr4:146682510-146682817	S_Shelf
cg07681156	-0.31632958	0.076036983	-4.160206898	3.18E-05	-0.465	-0.167	0.028587614	I	Red	19	56154921	R	NA	ZNF581	NM_016535	TSS200	chr19:56154791-56155117	Island
cg07705912	-0.22745998	0.053041725	-4.288321691	1.80E-05	-0.331	-0.124	0.024222597	I	Red	1	154155363	F	NA	TPM3;TPM3;TPM3;TPM3;TPM3	NM_001043352;NM_001043351;NM_152263;NM_001043353;NM_153649	Body;Body;Body;Body;Body	chr1:154155268-154155926	Island
cg07715894	0.552277567	0.121728403	4.536965505	5.71E-06	0.314	0.791	0.020026345	II	NA	16	11439533	R	NA	C16orf75	NM_152308	1stExon	chr16:11439186-11439767	Island
cg07723983	0.408750327	0.105106556	3.888913711	0.000100694	0.203	0.615	0.036133112	I	Grn	19	15252270	F	NA	NA	NA	NA	chr19:15252042-15252361	Island
cg07729916	0.489448759	0.127176093	3.848590947	0.000118799	0.24	0.739	0.037896474	I	Red	11	1027257	F	NA	MUC6	NM_005961	Body	chr11:1029083-1029390	N_Shore
cg07736115	0.578165542	0.155650144	3.714519801	0.00020359	0.273	0.883	0.04406837	I	Grn	13	113771937	R	rs10482847	F7;F7	NM_000131;NM_019616	Body;Body	chr13:113771854-113772088	Island
cg07747515	-0.261984939	0.065153739	-4.02102694	5.79E-05	-0.39	-0.134	0.031685944	I	Grn	11	61659326	R	NA	FADS3	NM_021727	TSS1500	chr11:61658569-61659592	Island
cg07755245	0.369349229	0.094206393	3.920638676	8.83E-05	0.185	0.554	0.034898758	I	Grn	19	4891238	F	rs61743208	ARRDC5	NM_001080523	Body	chr19:4891191-4891425	Island
cg07755343	0.313420992	0.076707673	4.085914473	4.39E-05	0.163	0.464	0.029853922	I	Grn	16	1712697	R	NA	CRAMP1L	NM_020825	Body	NA	NA
cg07758428	0.387472633	0.084936718	4.56189786	5.07E-06	0.221	0.554	0.019595269	I	Red	11	68193549	R	NA	LRP5	NM_002335	Body	chr11:68192510-68192798	S_Shore
cg07782795	0.5219764	0.144575079	3.610417519	0.000305705	0.239	0.805	0.049660139	I	Red	17	79066543	F	NA	BAIAP2;BAIAP2;BAIAP2;BAIAP2	NM_017450;NM_006340;NM_001144888;NM_017451	Body;Body;Body;Body	NA	NA
cg07783666	0.364962507	0.09970414	3.660454884	0.000251768	0.17	0.56	0.046675813	I	Red	19	1820164	R	NA	REXO1	NM_020695	Body	chr19:1818465-1818781	S_Shore
cg07794804	0.091599119	0.023405091	3.913640781	9.09E-05	0.046	0.137	0.035165173	II	NA	6	68948686	R	NA	NA	NA	NA	NA	NA
cg07812877	-0.378710896	0.090699401	-4.17545092	2.97E-05	-0.556	-0.201	0.028201076	I	Red	19	11531469	R	NA	RGL3;RGL3;CCDC151	NM_001035223;NM_001161616;NM_145045	TSS1500;TSS1500;3'UTR	chr19:11531278-11531590	Island
cg07821172	0.391403321	0.092169588	4.246556023	2.17E-05	0.211	0.572	0.025519536	II	NA	12	72058294	F	rs35288257	ZFC3H1;THAP2	NM_144982;NM_031435	TSS1500;1stExon	chr12:72056768-72057787	S_Shore
cg07822775	0.457399611	0.121630974	3.760552081	0.000169539	0.219	0.696	0.041598872	I	Red	15	101948657	R	NA	PCSK6;PCSK6;PCSK6;PCSK6;PCSK6;PCSK6;PCSK6;PCSK6	NM_002570;NM_138320;NM_138319;NM_138324;NM_138323;NM_138325;NM_138322;NM_138321	Body;Body;Body;Body;Body;Body;Body;Body	NA	NA
cg07841353	0.225250606	0.057840143	3.894364635	9.85E-05	0.112	0.339	0.035807825	II	NA	5	177980755	F	rs1545751	COL23A1	NM_173465	Body	NA	NA
cg07841762	0.330824173	0.08601982	3.845906356	0.000120108	0.162	0.499	0.037921489	I	Red	7	99704525	F	NA	AP4M1	NM_004722	3'UTR	NA	NA
cg07853743	-0.258764042	0.060569134	-4.272209695	1.94E-05	-0.377	-0.14	0.024382492	I	Red	16	2802190	F	rs77663700	SRRM2;LOC100128788	NM_016333;NR_027275	TSS200;Body	chr16:2801913-2803409	Island
cg07857404	0.325989437	0.08824968	3.693944699	0.000220802	0.153	0.499	0.044986128	II	NA	6	33378502	R	NA	PHF1;PHF1;PHF1	NR_027692;NM_002636;NM_024165	TSS1500;TSS1500;TSS1500	chr6:33377929-33379167	Island
cg07859876	0.81955296	0.219610184	3.73185316	0.000190076	0.389	1.25	0.043103373	II	NA	3	50654386	R	NA	MAPKAPK3	NM_004635	TSS1500	chr3:50654276-50655120	Island
cg07865391	0.250725028	0.063971651	3.919314654	8.88E-05	0.125	0.376	0.034938419	I	Red	16	88106882	F	rs72818568	BANP;BANP	NM_017869;NM_079837	Body;Body	chr16:88106774-88107337	Island
cg07870854	-0.592360764	0.159931019	-3.703851612	0.000212351	-0.906	-0.279	0.044588933	I	Red	16	791252	R	NA	NARFL	NM_022493	TSS1500	chr16:790626-791332	Island
cg07899956	-0.385939133	0.105857546	-3.645834867	0.000266525	-0.593	-0.178	0.04764401	I	Grn	17	74261249	F	NA	FAM100B	NM_182565	TSS200	chr17:74261127-74262282	Island
cg07905444	0.490937581	0.108827783	4.51114199	6.45E-06	0.278	0.704	0.020301864	II	NA	6	17101970	F	NA	NA	NA	NA	chr6:17102309-17102539	N_Shore
cg07915434	-0.398868456	0.110338137	-3.61496458	0.000300389	-0.615	-0.183	0.04944806	I	Red	10	102894342	R	NA	TLX1	NM_005521	Body	chr10:102893660-102895059	Island
cg07919162	0.737558326	0.193810903	3.805556413	0.000141486	0.358	1.117	0.039368142	II	NA	19	19431259	F	NA	SF4;KIAA0892	NM_172231;NM_015329	Body;TSS1500	chr19:19430966-19432194	Island
cg07920064	-0.22664922	0.061525421	-3.683830488	0.000229755	-0.347	-0.106	0.045423006	I	Red	2	220083856	R	NA	ABCB6	NM_005689	TSS200	chr2:220082991-220084012	Island
cg07940793	-0.287505804	0.077403781	-3.714363801	0.000203716	-0.439	-0.136	0.044075911	I	Red	17	79603854	F	NA	NPLOC4	NM_017921	Body	chr17:79603627-79603886	Island
cg07948034	0.203250479	0.055782181	3.643645239	0.000268804	0.094	0.313	0.047777671	II	NA	13	100635905	R	NA	ZIC2	NM_007129	Body	chr13:100637112-100637472	N_Shore
cg07949612	-0.470174214	0.124955464	-3.762734331	0.000168066	-0.715	-0.225	0.041504537	I	Red	2	69664562	F	NA	NFU1;NFU1;NFU1;NFU1;NFU1;NFU1;NFU1;NFU1	NM_001002756;NM_015700;NM_001002756;NM_015700;NM_001002757;NM_001002757;NM_001002755;NM_001002755	1stExon;1stExon;5'UTR;5'UTR;5'UTR;1stExon;5'UTR;1stExon	chr2:69664291-69664816	Island
cg07953307	0.799666668	0.217553105	3.675730887	0.000237169	0.373	1.226	0.045912367	II	NA	16	29000920	F	NA	LAT;LAT;LAT;LAT	NM_001014987;NM_001014989;NM_001014988;NM_014387	Body;Body;Body;Body	NA	NA
cg07959016	0.225581997	0.062091839	3.633037804	0.000280104	0.104	0.347	0.048603944	I	Red	19	42342105	F	NA	LYPD4	NM_173506	Body	NA	NA
cg07960450	-0.350295308	0.088141772	-3.974225856	7.06E-05	-0.523	-0.178	0.032962781	I	Grn	7	45614300	R	NA	ADCY1	NM_021116	1stExon	chr7:45613386-45615504	Island
cg07960806	-0.335087921	0.092061636	-3.639821508	0.000272827	-0.516	-0.155	0.047958301	I	Red	22	21319661	R	NA	AIFM3;AIFM3	NM_144704;NM_001018060	5'UTR;5'UTR	chr22:21319178-21319912	Island
cg07970400	-0.277079254	0.072053958	-3.845441163	0.000120336	-0.418	-0.136	0.037921489	I	Red	15	40650285	R	NA	DISP2	NM_033510	TSS200	chr15:40650055-40651102	Island
cg07972191	-0.938344613	0.210825576	-4.450810144	8.55E-06	-1.352	-0.525	0.020877178	I	Grn	8	99960580	F	NA	OSR2;OSR2	NM_053001;NM_001142462	5'UTR;5'UTR	chr8:99960497-99961438	Island
cg07982935	-0.243644979	0.064674638	-3.767241476	0.000165061	-0.37	-0.117	0.041297938	I	Red	16	75529346	R	NA	CHST6	NM_021615	TSS1500	chr16:75528624-75529437	Island
cg07996992	-0.519323763	0.140394341	-3.699036287	0.00021642	-0.794	-0.244	0.044762902	I	Red	1	85040343	R	NA	CTBS	NM_004388	TSS200	chr1:85039825-85040344	Island
cg07997575	0.277234705	0.067672004	4.096741488	4.19E-05	0.145	0.41	0.029423672	II	NA	1	165017443	F	NA	NA	NA	NA	NA	NA
cg08009116	0.655648239	0.173429707	3.780484037	0.000156524	0.316	0.996	0.040530219	II	NA	20	56285716	F	NA	PMEPA1;PMEPA1;PMEPA1;PMEPA1	NM_199170;NM_199169;NM_199171;NM_020182	TSS200;TSS200;5'UTR;TSS1500	chr20:56283891-56285395	S_Shore
cg08023179	-0.629036693	0.145117861	-4.334660726	1.46E-05	-0.913	-0.345	0.024222597	I	Grn	3	118753707	F	NA	IGSF11;IGSF11	NM_001015887;NM_152538	TSS200;Body	chr3:118753092-118753961	Island
cg08024316	-0.469810949	0.128211871	-3.664332691	0.000247984	-0.721	-0.219	0.046590992	I	Red	17	73401273	F	NA	GRB2;GRB2	NM_002086;NM_203506	5'UTR;5'UTR	chr17:73401217-73401988	Island
cg08028037	-0.523155667	0.140635242	-3.719947154	0.000199264	-0.799	-0.248	0.043559338	I	Grn	13	52027479	R	NA	INTS6;INTS6;INTS6	NM_012141;NM_001039938;NM_001039937	TSS1500;TSS1500;TSS1500	chr13:52025691-52027946	Island
cg08033114	-0.368492709	0.085711743	-4.299209122	1.71E-05	-0.536	-0.201	0.024222597	I	Grn	17	32907919	F	rs62063920	TMEM132E;TMEM132E	NM_207313;NM_207313	1stExon;5'UTR	chr17:32905965-32908951	Island
cg08036502	-0.619443072	0.16109007	-3.845321269	0.000120395	-0.935	-0.304	0.037921489	I	Grn	15	74420511	F	NA	LOC283731;ISLR2;ISLR2	NR_027073;NM_001130136;NM_001130137	Body;TSS1500;TSS1500	chr15:74419870-74423044	Island
cg08050235	-0.302055979	0.077802943	-3.882320739	0.000103464	-0.455	-0.15	0.036427231	I	Red	10	105036811	F	NA	INA	NM_032727	TSS200	chr10:105036628-105038084	Island
cg08054244	0.180760455	0.048966745	3.691494197	0.00022294	0.085	0.277	0.045061793	I	Red	14	88789549	F	NA	KCNK10;KCNK10;KCNK10	NM_138317;NM_021161;NM_138317	1stExon;Body;5'UTR	chr14:88789600-88790493	N_Shore
cg08057899	-0.755688032	0.206365865	-3.661884834	0.000250366	-1.16	-0.351	0.046590992	I	Grn	6	32122460	F	rs3096696	PPT2;PPT2	NM_005155;NM_138717	Body;Body	chr6:32121829-32122529	Island
cg08067404	-0.3448383	0.094859308	-3.63526053	0.0002777	-0.531	-0.159	0.048411709	I	Red	6	111580515	R	NA	KIAA1919;KIAA1919	NM_153369;NM_153369	5'UTR;1stExon	chr6:111580363-111580887	Island
cg08071238	0.388431126	0.098824454	3.930516283	8.48E-05	0.195	0.582	0.034846546	I	Red	16	88137387	R	NA	NA	NA	NA	chr16:88137245-88137598	Island
cg08073142	-0.243433457	0.061695888	-3.945699863	7.96E-05	-0.364	-0.123	0.034277591	I	Red	16	24740747	F	NA	TNRC6A	NM_014494	TSS1500	chr16:24740666-24741802	Island
cg08089031	-0.246533799	0.066431484	-3.711098779	0.000206362	-0.377	-0.116	0.044165261	I	Red	6	139456240	R	NA	HECA	NM_016217	TSS200	chr6:139456037-139457121	Island
cg08094235	0.313191993	0.085224196	3.674918717	0.000237925	0.146	0.48	0.045912367	I	Red	2	3463558	R	NA	TTC15	NM_016030	Body	chr2:3461654-3461863	S_Shore
cg08117436	0.607975883	0.134804832	4.510045174	6.48E-06	0.344	0.872	0.020301864	II	NA	1	93293756	F	NA	NA	NA	NA	chr1:93297498-93298122	N_Shelf
cg08123749	0.23328592	0.062710259	3.720059911	0.000199176	0.11	0.356	0.043559338	I	Red	16	30544067	R	NA	ZNF747	NM_023931	3'UTR	chr16:30543867-30544332	Island
cg08140891	-0.76157124	0.201886104	-3.77228162	0.000161762	-1.157	-0.366	0.041011573	I	Red	1	154955627	F	NA	FLAD1;FLAD1	NM_025207;NM_201398	TSS200;TSS200	NA	NA
cg08141245	0.781819289	0.20899454	3.740859877	0.000183392	0.372	1.191	0.042602342	II	NA	17	21117936	F	NA	TMEM11;TMEM11	NR_024547;NM_003876	TSS200;TSS200	chr17:21116850-21118031	Island
cg08143192	0.403390617	0.107442331	3.75448496	0.000173698	0.193	0.614	0.041926963	I	Grn	16	85952179	R	NA	IRF8	NM_002163	Body	NA	NA
cg08146698	0.258962968	0.071513829	3.621159296	0.000293286	0.119	0.399	0.049092143	I	Red	7	178613	F	NA	NA	NA	NA	chr7:178517-179127	Island
cg08158524	-0.329167683	0.086470135	-3.806721048	0.000140821	-0.499	-0.16	0.039368142	I	Red	12	129308519	F	NA	SLC15A4;SLC15A4	NM_145648;NM_145648	1stExon;5'UTR	chr12:129307947-129308724	Island
cg08163163	0.567039915	0.150194985	3.775358508	0.000159778	0.273	0.861	0.040835508	I	Red	1	16415115	R	NA	NA	NA	NA	NA	NA
cg08166513	0.375598031	0.10412124	3.60731424	0.000309383	0.172	0.58	0.049946066	I	Red	1	233120048	F	NA	PCNXL2	NM_014801	3'UTR	chr1:233121927-233122136	N_Shore
cg08170869	-0.429751917	0.096674219	-4.4453622	8.77E-06	-0.619	-0.24	0.020877178	I	Grn	6	26188969	F	NA	HIST1H4D;HIST1H4D	NM_003539;NM_003539	3'UTR;1stExon	chr6:26188997-26189295	N_Shore
cg08192683	0.216210558	0.057734394	3.744917788	0.000180453	0.103	0.329	0.042393413	I	Grn	7	157551275	R	NA	PTPRN2;PTPRN2;PTPRN2	NM_002847;NM_130842;NM_130843	Body;Body;Body	chr7:157550547-157551025	S_Shore
cg08202769	-0.165323276	0.042687928	-3.872834404	0.000107577	-0.249	-0.082	0.036737788	I	Red	11	65338440	R	NA	FAM89B;FAM89B;FAM89B;SSSCA1	NM_152832;NM_001098785;NM_001098784;NM_006396	TSS1500;TSS1500;TSS1500;Body	chr11:65337213-65338474	Island
cg08217567	0.243721137	0.065318888	3.731250532	0.000190532	0.116	0.372	0.04310596	I	Red	8	143373080	R	NA	TSNARE1	NM_145003	Body	NA	NA
cg08240007	-0.342201046	0.093431395	-3.662591621	0.000249676	-0.525	-0.159	0.046590992	I	Red	2	220407822	R	NA	CHPF;TMEM198	NM_024536;NM_001005209	Body;TSS1500	chr2:220407698-220409048	Island
cg08248366	-0.26886611	0.069535136	-3.866622321	0.000110353	-0.405	-0.133	0.036972901	I	Grn	19	14247414	F	NA	ASF1B;ASF1B	NM_018154;NM_018154	5'UTR;1stExon	chr19:14246899-14248520	Island
cg08255233	0.272652171	0.072867894	3.741732538	0.000182756	0.13	0.415	0.042598101	I	Grn	6	87607178	R	NA	NA	NA	NA	NA	NA
cg08262876	0.499445595	0.122759676	4.068482517	4.73E-05	0.259	0.74	0.030242045	II	NA	10	102757026	R	NA	LZTS2	NM_032429	5'UTR	chr10:102756834-102759798	Island
cg08266945	-0.545368586	0.135757799	-4.017217357	5.89E-05	-0.811	-0.279	0.03201737	I	Red	2	170550881	R	NA	C2orf77;C2orf77;PHOSPHO2;KLHL23	NM_001085447;NM_001085447;NM_001008489;NM_144711	5'UTR;1stExon;TSS200;TSS200	chr2:170550783-170551371	Island
cg08291069	-0.577028823	0.138552207	-4.16470321	3.12E-05	-0.849	-0.305	0.028459967	I	Grn	19	10531543	F	NA	PDE4A	NM_001111307	1stExon	chr19:10529627-10532004	Island
cg08305872	-0.406393793	0.110712942	-3.670698174	0.000241889	-0.623	-0.189	0.046344325	I	Red	2	210867207	F	rs73984319	RPE;RPE	NM_199229;NM_006916	TSS200;TSS200	chr2:210867172-210867705	Island
cg08313168	-0.428984154	0.105286065	-4.074462784	4.61E-05	-0.635	-0.223	0.030242045	I	Red	12	7315531	F	NA	NA	NA	NA	NA	NA
cg08314161	0.07969733	0.019812817	4.0225137	5.76E-05	0.041	0.119	0.031685944	II	NA	5	108505130	F	NA	FER	NM_005246	Body	NA	NA
cg08349335	0.309683077	0.083650196	3.702120167	0.000213805	0.146	0.474	0.044588933	I	Red	6	170041420	F	rs78952733	WDR27	NM_182552	Body	NA	NA
cg08365301	0.572515357	0.131606386	4.350209547	1.36E-05	0.315	0.83	0.024188012	I	Red	10	5523060	F	rs12247513	NA	NA	NA	NA	NA
cg08396704	-0.809828956	0.219219335	-3.694149309	0.000220624	-1.239	-0.38	0.044970012	I	Red	7	135243380	F	NA	NUP205	NM_015135	Body	NA	NA
cg08430516	-0.347469979	0.087403304	-3.975478784	7.02E-05	-0.519	-0.176	0.03294454	I	Red	16	31519685	F	NA	C16orf58	NM_022744	1stExon	chr16:31519381-31519940	Island
cg08456247	0.382565117	0.084399159	4.532807223	5.82E-06	0.217	0.548	0.020026345	II	NA	2	56410143	F	rs6742077	CCDC85A	NM_001080433	TSS1500	chr2:56410865-56412539	N_Shore
cg08465307	0.300863442	0.078272232	3.843808143	0.00012114	0.147	0.454	0.037921489	I	Red	1	3827081	R	NA	LOC100133612	NR_024455	Body	chr1:3824219-3824456	S_Shelf
cg08478283	0.506879645	0.131430689	3.856630813	0.000114961	0.249	0.764	0.037485912	II	NA	1	117076803	R	NA	CD58;CD58;CD58	NM_001779;NR_026665;NM_001144822	Body;Body;Body	chr1:117077042-117077299	N_Shore
cg08490107	0.529697643	0.13678548	3.872469813	0.000107738	0.262	0.798	0.036737788	I	Grn	5	171774272	F	NA	SH3PXD2B	NM_001017995	Body	NA	NA
cg08498465	0.210428063	0.055806337	3.770684008	0.000162801	0.101	0.32	0.041091181	I	Red	16	11084209	F	rs9930004	CLEC16A	NM_015226	Body	NA	NA
cg08498485	-0.447016253	0.112338562	-3.979187975	6.92E-05	-0.667	-0.227	0.032873036	I	Grn	3	49711383	F	NA	APEH	NM_001640	TSS200	chr3:49710968-49712279	Island
cg08506306	0.526412725	0.136248943	3.863609621	0.000111724	0.259	0.793	0.03718532	I	Grn	19	1580576	F	NA	MBD3	NM_003926	Body	chr19:1580399-1580630	Island
cg08529345	-0.243796417	0.06752635	-3.61038937	0.000305738	-0.376	-0.111	0.049660139	I	Red	16	54971700	F	NA	NA	NA	NA	chr16:54970301-54972846	Island
cg08533403	0.179808278	0.044036715	4.083144658	4.44E-05	0.093	0.266	0.029953167	II	NA	19	40854718	F	NA	PLD3;PLD3;C19orf47	NM_012268;NM_001031696;NM_178830	5'UTR;5'UTR;TSS1500	chr19:40854180-40854733	Island
cg08535309	-0.623914624	0.143148683	-4.358507604	1.31E-05	-0.904	-0.343	0.023816414	I	Grn	16	67867843	F	NA	CENPT	NM_025082	5'UTR	chr16:67867658-67867898	Island
cg08541729	-0.507162313	0.135991035	-3.729380496	0.000191951	-0.774	-0.241	0.043182539	I	Red	19	2051277	F	rs11879666	MKNK2;MKNK2	NM_199054;NM_017572	TSS200;TSS200	chr19:2050630-2051566	Island
cg08542520	0.330062729	0.085132002	3.877070001	0.000105722	0.163	0.497	0.036634949	I	Grn	16	88044764	F	rs4843842	BANP;BANP	NM_017869;NM_079837	Body;Body	chr16:88044296-88044502	S_Shore
cg08545132	0.293037484	0.078792863	3.719086617	0.000199944	0.139	0.447	0.043649032	I	Red	19	15348803	F	NA	BRD4	NM_058243	3'UTR	chr19:15348678-15349007	Island
cg08555013	-0.332504767	0.079564516	-4.179058487	2.93E-05	-0.488	-0.177	0.028031223	I	Red	4	83932063	F	NA	LIN54;LIN54;LIN54	NM_001115007;NM_001115008;NM_194282	5'UTR;TSS200;TSS200	chr4:83931642-83932194	Island
cg08569414	-0.358924546	0.088811058	-4.04143982	5.31E-05	-0.533	-0.185	0.031105128	I	Grn	19	41903234	R	NA	EXOSC5;EXOSC5;BCKDHA;BCKDHA	NM_020158;NM_020158;NM_001164783;NM_000709	1stExon;5'UTR;TSS1500;TSS1500	chr19:41903114-41903361	Island
cg08576643	-0.671552565	0.181887702	-3.692127389	0.000222386	-1.028	-0.315	0.045061793	I	Red	6	24911545	R	NA	FAM65B	NM_014722	TSS1500	chr6:24910626-24911285	S_Shore
cg08579753	0.437248973	0.105206071	4.156119211	3.24E-05	0.231	0.643	0.028783834	II	NA	1	39174525	F	rs55675258	NA	NA	NA	chr1:39174379-39174940	Island
cg08591886	-0.270727361	0.071161486	-3.804408475	0.000142143	-0.41	-0.131	0.039368142	I	Red	16	81111003	R	NA	C16orf46;C16orf46	NM_001100873;NM_152337	TSS200;TSS200	chr16:81110485-81111243	Island
cg08620789	-0.686581322	0.18048372	-3.804117736	0.00014231	-1.04	-0.333	0.039377694	I	Grn	7	157129638	R	NA	DNAJB6;DNAJB6	NM_005494;NM_058246	TSS200;TSS200	chr7:157129089-157130306	Island
cg08624472	-0.381076333	0.100159163	-3.804707636	0.000141972	-0.577	-0.185	0.039368142	I	Red	7	98971852	F	NA	ARPC1B	NM_005720	TSS1500	chr7:98971649-98973170	Island
cg08628777	0.591583834	0.148053671	3.995739048	6.45E-05	0.301	0.882	0.032655163	I	Red	7	158050156	R	NA	PTPRN2;PTPRN2;PTPRN2	NM_002847;NM_130842;NM_130843	Body;Body;Body	NA	NA
cg08644993	-0.278637964	0.072989343	-3.817515719	0.000134802	-0.422	-0.136	0.038947178	I	Red	1	153508755	R	NA	S100A6	NM_014624	TSS200	chr1:153508424-153508840	Island
cg08647910	0.773711732	0.174112613	4.443743157	8.84E-06	0.432	1.115	0.020877178	II	NA	6	134497084	F	NA	SGK1;SGK1;SGK1;SGK1	NM_001143676;NM_001143678;NM_001143677;NM_005627	Body;TSS200;Body;TSS1500	chr6:134497536-134497756	N_Shore
cg08657851	0.316659551	0.080292541	3.943822782	8.02E-05	0.159	0.474	0.034333888	I	Red	7	1354923	F	rs75007613	NA	NA	NA	chr7:1351464-1351904	S_Shelf
cg08689931	-0.393961551	0.109254796	-3.605897072	0.000311076	-0.608	-0.18	0.049993209	I	Red	7	86781758	F	NA	DMTF1;DMTF1;DMTF1;DMTF1;DMTF1;DMTF1;DMTF1	NM_001142327;NM_021145;NM_001142327;NM_001142326;NR_024550;NR_024549;NM_001142326	5'UTR;TSS200;1stExon;1stExon;Body;Body;5'UTR	chr7:86781624-86782194	Island
cg08701134	0.223100624	0.055565419	4.015098349	5.94E-05	0.114	0.332	0.03206475	I	Red	16	69969618	R	NA	WWP2;WWP2	NM_199424;NM_007014	Body;Body	NA	NA
cg08707786	-0.371414742	0.101424332	-3.661988531	0.000250265	-0.57	-0.173	0.046590992	I	Red	1	210406599	R	NA	SERTAD4;C1orf133	NM_019605;NR_024337	5'UTR;Body	chr1:210405952-210407250	Island
cg08709073	-0.545439831	0.143903596	-3.790314101	0.000150457	-0.827	-0.263	0.040279156	I	Red	5	63802184	F	NA	RGS7BP	NM_001029875	TSS1500	chr5:63801781-63802605	Island
cg08709879	-0.416864967	0.10383372	-4.014735944	5.95E-05	-0.62	-0.213	0.03206475	I	Red	6	33359098	F	rs465474	KIFC1	NM_002263	TSS1500	chr6:33359097-33359975	Island
cg08732456	0.22638106	0.052957281	4.274786321	1.91E-05	0.123	0.33	0.024380182	I	Red	1	2020870	R	NA	PRKCZ;PRKCZ	NM_002744;NM_001033581	Body;5'UTR	NA	NA
cg08754618	-0.221554009	0.05688168	-3.894997626	9.82E-05	-0.333	-0.11	0.03579364	I	Grn	20	24973613	F	rs28760559	C20orf3	NM_020531	TSS200	chr20:24972665-24973700	Island
cg08766170	0.462163226	0.125691951	3.676951642	0.000236038	0.216	0.709	0.04590801	I	Red	7	71177239	R	NA	WBSCR17	NM_022479	3'UTR	NA	NA
cg08780106	0.239896103	0.064319712	3.729744694	0.000191674	0.114	0.366	0.043143241	I	Red	10	29780366	R	NA	SVIL;SVIL	NM_021738;NM_003174	Body;Body	NA	NA
cg08788576	-0.488383701	0.134133024	-3.641039972	0.000271539	-0.751	-0.225	0.047905316	I	Grn	10	75571325	F	NA	NDST2;NDST2	NM_003635;NM_003635	1stExon;5'UTR	chr10:75570928-75571809	Island
cg08805662	-0.260732103	0.063113946	-4.131132966	3.61E-05	-0.384	-0.137	0.029421726	I	Red	2	70369329	R	NA	NA	NA	NA	chr2:70369139-70370130	Island
cg08807995	0.292267159	0.077975779	3.748178757	0.000178123	0.139	0.445	0.04227347	I	Red	16	586923	R	NA	SOLH	NM_005632	5'UTR	chr16:587567-588172	N_Shore
cg08809979	-0.741011881	0.201624224	-3.675212562	0.000237651	-1.136	-0.346	0.045912367	I	Grn	16	69373666	F	NA	COG8;NIP7;NIP7	NM_032382;NM_016101;NM_016101	TSS200;5'UTR;1stExon	chr16:69373061-69373882	Island
cg08811509	-0.510410213	0.134112012	-3.805850087	0.000141318	-0.773	-0.248	0.039368142	II	NA	9	95640366	R	NA	ZNF484;ZNF484	NM_001007101;NM_031486	TSS200;TSS200	NA	NA
cg08828607	-0.444581691	0.10970299	-4.052594113	5.07E-05	-0.66	-0.23	0.030511754	I	Grn	5	96519465	R	NA	RIOK2;RIOK2	NM_018343;NM_001159749	TSS1500;TSS1500	chr5:96519419-96519645	Island
cg08835795	0.840985126	0.210004457	4.004606088	6.21E-05	0.429	1.253	0.032399883	II	NA	19	53685874	R	NA	ZNF665	NM_024733	Body	NA	NA
cg08838806	-0.448971396	0.098932293	-4.538168301	5.67E-06	-0.643	-0.255	0.020026345	I	Red	7	87505479	R	NA	SLC25A40;SLC25A40;DBF4	NM_018843;NM_018843;NM_006716	5'UTR;1stExon;TSS200	chr7:87505100-87506493	Island
cg08856879	-0.394166765	0.097279335	-4.051906465	5.08E-05	-0.585	-0.204	0.030511754	I	Red	13	95201535	F	NA	NA	NA	NA	chr13:95201560-95202293	N_Shore
cg08872579	0.745070705	0.192954368	3.861382949	0.000112747	0.367	1.123	0.03735502	II	NA	1	55265830	F	NA	TTC22;TTC22	NM_001114108;NM_017904	Body;Body	chr1:55266277-55267058	N_Shore
cg08876479	-0.754856509	0.199853372	-3.777051655	0.000158696	-1.147	-0.363	0.040714231	I	Grn	10	38146530	R	NA	ZNF248	NM_021045	TSS200	chr10:38146502-38147104	Island
cg08876932	-0.331044208	0.083789461	-3.950905079	7.79E-05	-0.495	-0.167	0.033886467	I	Grn	11	71955547	F	NA	PHOX2A	NM_005169	TSS1500	chr11:71954816-71955659	Island
cg08877142	0.292318299	0.080876341	3.61438582	0.00030106	0.134	0.451	0.04944806	I	Red	8	145661886	F	NA	NFKBIL2	NM_013432	Body	chr8:145662143-145662383	N_Shore
cg08878447	0.249677188	0.068520932	3.643808963	0.000268633	0.115	0.384	0.047777671	I	Red	5	1769471	R	NA	NA	NA	NA	chr5:1769314-1769695	Island
cg08906153	0.205884094	0.050561874	4.071923743	4.66E-05	0.107	0.305	0.030242045	I	Red	17	78061579	R	NA	CCDC40	NM_017950	Body	NA	NA
cg08916340	-0.443647583	0.092281258	-4.807558881	1.53E-06	-0.625	-0.263	0.018650808	I	Red	10	112631462	F	rs78919450	LOC282997;PDCD4;PDCD4	NR_026932;NM_014456;NM_145341	TSS1500;TSS200;TSS200	chr10:112631414-112632476	Island
cg08940762	-0.758208295	0.20105309	-3.771184488	0.000162474	-1.152	-0.364	0.041085061	I	Grn	2	233415810	R	NA	TIGD1;EIF4E2	NM_145702;NM_004846	TSS1500;Body	chr2:233415005-233415811	Island
cg08944318	-0.437261986	0.117521021	-3.720712971	0.000198661	-0.668	-0.207	0.043502337	I	Red	10	15139147	F	NA	RPP38;C10orf111;RPP38;C10orf111;RPP38	NM_183005;NM_153244;NM_006414;NM_153244;NM_001097590	TSS200;1stExon;TSS200;5'UTR;TSS200	chr10:15138965-15139851	Island
cg08950886	-0.522667455	0.136832006	-3.819774858	0.000133574	-0.791	-0.254	0.038832516	I	Grn	10	33247484	R	NA	ITGB1;ITGB1	NM_002211;NM_133376	TSS200;TSS1500	chr10:33246271-33247707	Island
cg08967632	0.275407684	0.070366547	3.913900784	9.08E-05	0.137	0.413	0.035165173	I	Red	6	159342738	F	rs7756181	NA	NA	NA	NA	NA
cg08971981	-0.236963689	0.054730731	-4.329627688	1.49E-05	-0.344	-0.13	0.024222597	I	Grn	7	44163271	F	NA	POLD2;POLD2	NM_006230;NM_001127218	TSS200;TSS200	chr7:44162850-44163720	Island
cg09010904	-0.279867377	0.077124238	-3.628786269	0.000284757	-0.431	-0.129	0.048713332	I	Red	3	51573036	R	NA	NA	NA	NA	chr3:51572595-51573273	Island
cg09014132	0.258412883	0.071369122	3.620793907	0.0002937	0.119	0.398	0.049092143	I	Red	13	113803019	R	NA	F10	NM_000504	Body	chr13:113803217-113803479	N_Shore
cg09042437	0.948551959	0.206453009	4.594517489	4.34E-06	0.544	1.353	0.019595269	I	Grn	2	236643760	F	NA	AGAP1;AGAP1	NM_014914;NM_001037131	Body;Body	NA	NA
cg09042952	-0.249331543	0.066436926	-3.7529061	0.000174796	-0.38	-0.119	0.042026344	I	Red	12	122237463	F	NA	LOC338799	NR_002809	Body	chr12:122238028-122239351	N_Shore
cg09047034	0.469730119	0.125630816	3.738972133	0.000184774	0.223	0.716	0.042622298	I	Grn	2	38762714	F	NA	NA	NA	NA	chr2:38763114-38763564	N_Shore
cg09049436	0.367989778	0.072927626	5.045958566	4.51E-07	0.225	0.511	0.014779204	II	NA	5	178854758	F	NA	NA	NA	NA	NA	NA
cg09057050	0.746671387	0.166313285	4.489547459	7.14E-06	0.421	1.073	0.020802234	II	NA	16	66639160	R	NA	CMTM3;CMTM3;CMTM3;CMTM3	NM_001048251;NM_181554;NM_144601;NM_181553	Body;Body;Body;Body	chr16:66638254-66639561	Island
cg09070522	-0.547919155	0.143582167	-3.8160669	0.000135596	-0.829	-0.267	0.038960227	I	Red	4	57774717	R	NA	REST	NM_005612	5'UTR	chr4:57773867-57775602	Island
cg09080920	0.509742944	0.140692262	3.623105763	0.000291087	0.234	0.785	0.049016605	I	Red	16	928338	R	rs7193745	LMF1	NM_022773	Body	chr16:928142-928380	Island
cg09086835	-0.47266805	0.126910908	-3.724408397	0.000195774	-0.721	-0.224	0.043426453	I	Red	15	89922345	F	NA	LOC254559	NR_015411	Body	chr15:89920793-89922768	Island
cg09087777	-0.80610806	0.212949169	-3.78544825	0.000153432	-1.223	-0.389	0.040478954	I	Grn	3	150321365	F	NA	SELT	NM_016275	Body	chr3:150321002-150321791	Island
cg09104050	-0.321491682	0.082891848	-3.878447511	0.000105125	-0.484	-0.159	0.036587489	I	Red	16	68563912	R	NA	NA	NA	NA	chr16:68563759-68564281	Island
cg09113420	0.690687356	0.181169376	3.812384683	0.000137632	0.336	1.046	0.038960227	II	NA	2	207027298	F	NA	EEF1B2;EEF1B2;EEF1B2	NM_001037663;NM_001959;NM_021121	Body;Body;Body	chr2:207023910-207024981	S_Shelf
cg09114211	0.331298193	0.080790339	4.100715465	4.12E-05	0.173	0.49	0.029421726	I	Red	2	97505708	F	NA	ANKRD23	NM_144994	Body	chr2:97505219-97505600	S_Shore
cg09129895	-0.241663457	0.062859772	-3.844485102	0.000120806	-0.365	-0.118	0.037921489	I	Red	5	54603789	R	NA	DHX29;SKIV2L2;SKIV2L2	NM_019030;NM_015360;NM_015360	TSS1500;1stExon;5'UTR	chr5:54603209-54603904	Island
cg09156542	0.203540908	0.052728468	3.860171119	0.000113308	0.1	0.307	0.03735502	I	Red	13	112164701	F	NA	NA	NA	NA	NA	NA
cg09158336	-0.49608341	0.134871248	-3.67819989	0.000234886	-0.76	-0.232	0.045829538	I	Grn	17	76338205	R	NA	NA	NA	NA	chr17:76337725-76338582	Island
cg09169014	0.441137947	0.117450305	3.755954032	0.000172682	0.211	0.671	0.041921827	I	Grn	10	134064112	R	NA	STK32C	NM_173575	Body	NA	NA
cg09184192	-0.52035309	0.120862295	-4.305338503	1.67E-05	-0.757	-0.283	0.024222597	I	Grn	14	94492986	F	NA	OTUB2	NM_023112	Body	chr14:94492639-94493297	Island
cg09219142	-0.562884168	0.143486218	-3.922914506	8.75E-05	-0.844	-0.282	0.034883186	I	Grn	13	20767876	R	NA	GJB2	NM_004004	TSS1500	chr13:20766208-20767779	S_Shore
cg09221960	0.334653002	0.078497374	4.263238201	2.01E-05	0.181	0.489	0.024642275	I	Red	11	120434710	R	NA	NA	NA	NA	chr11:120434822-120435940	N_Shore
cg09222259	-0.329382451	0.089760931	-3.669552542	0.000242975	-0.505	-0.153	0.046423493	I	Red	16	2802304	F	NA	SRRM2;LOC100128788	NM_016333;NR_027275	TSS200;Body	chr16:2801913-2803409	Island
cg09222732	0.719873264	0.154229878	4.667534412	3.05E-06	0.418	1.022	0.019595269	I	Grn	6	466893	F	rs73374982	NA	NA	NA	NA	NA
cg09233392	-0.422917356	0.09370183	-4.513437537	6.38E-06	-0.607	-0.239	0.020301864	I	Red	10	50887488	F	rs2289305	C10orf53;C10orf53	NM_182554;NM_001042427	TSS200;TSS200	chr10:50887565-50887862	N_Shore
cg09244174	0.482990296	0.119031627	4.057663572	4.96E-05	0.25	0.716	0.030346704	I	Grn	7	97978730	R	NA	BAIAP2L1	NM_018842	Body	NA	NA
cg09251995	0.54679839	0.142301561	3.842532616	0.000121771	0.268	0.826	0.038040146	II	NA	19	18392994	R	NA	JUND	NM_005354	TSS1500	chr19:18390360-18392734	S_Shore
cg09256617	-0.453649372	0.124934943	-3.631084781	0.000282232	-0.699	-0.209	0.048642967	I	Red	11	44587148	R	NA	CD82;CD82;CD82;CD82	NM_002231;NM_001024844;NM_001024844;NM_002231	5'UTR;1stExon;5'UTR;1stExon	chr11:44586602-44587404	Island
cg09269935	0.33185769	0.087149393	3.807917387	0.000140142	0.161	0.503	0.039307139	I	Red	1	4541555	F	NA	NA	NA	NA	NA	NA
cg09314155	0.597494555	0.138285014	4.320746977	1.56E-05	0.326	0.869	0.024222597	II	NA	7	45196501	R	NA	RAMP3	NM_005856	TSS1500	chr7:45197181-45197807	N_Shore
cg09321747	-0.543502904	0.126577007	-4.293851767	1.76E-05	-0.792	-0.295	0.024222597	I	Red	14	23821445	R	NA	SLC22A17;SLC22A17;SLC22A17	NM_016609;NM_020372;NM_020372	5'UTR;1stExon;5'UTR	chr14:23821087-23822106	Island
cg09352908	0.179151653	0.049217832	3.639974474	0.000272665	0.083	0.276	0.047958301	I	Red	3	37017749	R	NA	NA	NA	NA	NA	NA
cg09362969	0.492428978	0.126995403	3.877533898	0.000105521	0.244	0.741	0.036634949	I	Grn	1	3827065	R	NA	LOC100133612	NR_024455	Body	chr1:3824219-3824456	S_Shelf
cg09369535	0.2311862	0.063512833	3.639991916	0.000272647	0.107	0.356	0.047958301	I	Red	12	128245800	F	rs73234764	NA	NA	NA	chr12:128245592-128245836	Island
cg09372755	-0.368694226	0.101246321	-3.641556782	0.000270994	-0.567	-0.17	0.047871157	I	Red	1	43919584	F	NA	HYI	NM_031207	5'UTR	chr1:43919083-43919814	Island
cg09372928	-0.197868801	0.054468328	-3.632731297	0.000280437	-0.305	-0.091	0.048642645	I	Red	1	6845395	R	NA	CAMTA1;CAMTA1	NM_015215;NM_015215	1stExon;5'UTR	chr1:6844313-6846366	Island
cg09379497	0.965719092	0.258259012	3.739343237	0.000184502	0.46	1.472	0.042622298	II	NA	6	30624467	F	NA	DHX16;DHX16	NM_001164239;NM_003587	Body;Body	NA	NA
cg09386807	-0.250927573	0.06434433	-3.899761976	9.63E-05	-0.377	-0.125	0.035664673	I	Red	3	50375496	R	NA	RASSF1;RASSF1;RASSF1;RASSF1	NM_170713;NM_170714;NM_007182;NM_170712	TSS1500;Body;Body;5'UTR	chr3:50374264-50375629	Island
cg09409496	-0.228153286	0.059251072	-3.850618732	0.00011782	-0.344	-0.112	0.037707725	I	Red	21	38738374	F	NA	DYRK1A	NM_101395	TSS1500	NA	NA
cg09418673	0.370485943	0.100059618	3.702651974	0.000213357	0.174	0.567	0.044588933	I	Red	11	76372128	R	NA	LRRC32;LRRC32	NM_001128922;NM_005512	Body;Body	NA	NA
cg09420637	-0.337291411	0.092469405	-3.647600108	0.000264701	-0.519	-0.156	0.047554743	I	Grn	10	102906525	R	NA	NA	NA	NA	chr10:102905714-102906693	Island
cg09441736	0.451664339	0.120812907	3.738543759	0.000185089	0.215	0.688	0.042666347	I	Red	7	101849549	R	NA	CUX1;CUX1;CUX1	NM_181500;NM_181552;NM_001913	Body;Body;Body	NA	NA
cg09454676	0.391912868	0.106923609	3.665353904	0.000246997	0.182	0.601	0.046554765	II	NA	2	207307732	F	NA	ADAM23	NM_003812	TSS1500	chr2:207308266-207308907	N_Shore
cg09463900	-0.185993767	0.04841064	-3.842001821	0.000122035	-0.281	-0.091	0.038040146	I	Red	19	12939587	R	NA	RTBDN;RTBDN	NM_001080997;NM_031429	Body;Body	chr19:12939415-12939662	Island
cg09467020	0.308507468	0.076197702	4.048776545	5.15E-05	0.159	0.458	0.030671296	II	NA	12	125398629	F	NA	UBC	NM_021009	5'UTR	chr12:125398558-125399899	Island
cg09468777	0.3999659	0.109200463	3.662675854	0.000249594	0.186	0.614	0.046590992	I	Grn	4	658981	F	NA	PDE6B;PDE6B;PDE6B	NM_000283;NM_001145291;NM_001145292	Body;Body;Body	chr4:656993-658162	S_Shore
cg09475510	-0.307708459	0.076966412	-3.997957693	6.39E-05	-0.459	-0.157	0.032587381	I	Red	6	89790414	R	NA	PNRC1	NM_006813	TSS200	chr6:89790137-89791781	Island
cg09488184	0.654060381	0.150973777	4.332278065	1.48E-05	0.358	0.95	0.024222597	II	NA	17	21317998	R	NA	KCNJ12	NM_021012	5'UTR	chr17:21318650-21320041	N_Shore
cg09490756	0.421762684	0.116568703	3.618146844	0.00029672	0.193	0.65	0.049188294	I	Red	16	86665961	R	NA	NA	NA	NA	NA	NA
cg09499844	0.166447716	0.045092056	3.691286897	0.000223122	0.078	0.255	0.045061793	I	Red	8	129045722	F	rs76611024	PVT1	NR_003367	Body	NA	NA
cg09526708	-0.811017944	0.17962555	-4.515047806	6.33E-06	-1.163	-0.459	0.020301864	I	Grn	6	127442648	F	rs79946270	RSPO3	NM_032784	Body	chr6:127439265-127441072	S_Shore
cg09527021	1.172794986	0.290266603	4.040406211	5.34E-05	0.604	1.742	0.031107885	II	NA	1	166845374	F	NA	TADA1	NM_053053	Body	chr1:166844996-166845773	Island
cg09546307	0.486664496	0.13091348	3.717451382	0.000201243	0.23	0.743	0.043781737	II	NA	12	8664963	F	NA	CLEC4D	NM_080387	TSS1500	NA	NA
cg09550323	0.282287578	0.076094181	3.709713067	0.000207494	0.133	0.431	0.044165261	I	Grn	19	42873824	F	rs73554568	MEGF8	NM_001410	Body	chr19:42873698-42873954	Island
cg09551172	-0.544324248	0.127676008	-4.263324458	2.01E-05	-0.795	-0.294	0.024642275	I	Red	1	100315427	F	rs77178601	AGL;AGL;AGL;AGL;AGL	NM_000644;NM_000643;NM_000642;NM_000646;NM_000028	TSS1500;TSS1500;TSS1500;TSS1500;TSS1500	chr1:100315420-100316009	Island
cg09553753	0.642529112	0.141596184	4.537757257	5.69E-06	0.365	0.92	0.020026345	I	Red	8	143055450	F	NA	NA	NA	NA	chr8:143054784-143055048	S_Shore
cg09562174	-0.563660596	0.143062775	-3.939952909	8.15E-05	-0.844	-0.283	0.034533653	I	Red	16	87811505	F	NA	NA	NA	NA	chr16:87812833-87813070	N_Shore
cg09573809	-0.262135537	0.069807434	-3.755123496	0.000173256	-0.399	-0.125	0.041926963	I	Grn	19	58874563	R	NA	ZNF497	NM_198458	TSS1500	chr19:58873264-58874535	S_Shore
cg09584118	0.505650146	0.139553404	3.62334513	0.000290817	0.232	0.779	0.049016605	II	NA	11	45273975	F	NA	SYT13	NM_020826	Body	NA	NA
cg09600088	0.53333732	0.13399652	3.980232631	6.88E-05	0.271	0.796	0.032844427	I	Red	11	1464485	F	NA	BRSK2	NM_003957	Body	chr11:1464295-1464899	Island
cg09614876	0.286029742	0.073087979	3.913499113	9.10E-05	0.143	0.429	0.035165173	I	Red	4	52861831	R	NA	LRRC66	NM_001024611	Body	NA	NA
cg09623457	-0.270508963	0.064894678	-4.168430604	3.07E-05	-0.398	-0.143	0.028319524	I	Red	3	183735666	F	rs57683047	ABCC5;ABCC5;ABCC5;ABCC5	NM_001023587;NM_005688;NM_001023587;NM_005688	1stExon;1stExon;5'UTR;5'UTR	chr3:183735183-183736103	Island
cg09655666	-0.447526807	0.10487473	-4.26725109	1.98E-05	-0.653	-0.242	0.024636171	I	Grn	17	34820190	R	NA	NA	NA	NA	chr17:34819844-34820754	Island
cg09665311	0.837987923	0.18109331	4.62738199	3.70E-06	0.483	1.193	0.019595269	II	NA	1	33429393	R	NA	RNF19B;RNF19B	NM_153341;NM_001127361	Body;Body	chr1:33429531-33430513	N_Shore
cg09681877	-0.396333143	0.098911974	-4.006927849	6.15E-05	-0.59	-0.202	0.032392204	I	Red	5	113391671	F	rs35531776	NA	NA	NA	chr5:113391071-113392005	Island
cg09694336	0.796142993	0.196336412	4.054994104	5.01E-05	0.411	1.181	0.030412231	I	Red	16	2774991	F	NA	NA	NA	NA	chr16:2771081-2771365	S_Shelf
cg09722315	0.302884052	0.082844784	3.656042524	0.000256139	0.141	0.465	0.046892346	I	Red	6	167808366	R	NA	NA	NA	NA	NA	NA
cg09724798	0.321574653	0.065189544	4.932917632	8.10E-07	0.194	0.449	0.016988272	I	Red	12	119741507	R	NA	LOC144742	NR_024246	TSS1500	NA	NA
cg09736968	-0.305171416	0.078401383	-3.892423882	9.92E-05	-0.459	-0.152	0.035914659	I	Red	2	233351609	R	NA	ECEL1	NM_004826	5'UTR	chr2:233350278-233352974	Island
cg09754110	0.268726958	0.066858349	4.019347824	5.84E-05	0.138	0.4	0.031872012	I	Red	1	10714160	F	NA	CASZ1;CASZ1	NM_017766;NM_001079843	Body;Body	chr1:10713838-10714203	Island
cg09759737	0.507611186	0.12380608	4.100050539	4.13E-05	0.265	0.75	0.029421726	I	Red	7	158037881	F	rs12698176	PTPRN2;PTPRN2;PTPRN2	NM_002847;NM_130842;NM_130843	Body;Body;Body	chr7:158037708-158038048	Island
cg09770068	0.353258228	0.092519109	3.818219082	0.000134419	0.172	0.535	0.038894395	I	Grn	12	52294251	R	NA	NA	NA	NA	chr12:52294173-52294632	Island
cg09796886	-0.803794851	0.194582271	-4.130874038	3.61E-05	-1.185	-0.422	0.029421726	I	Red	4	39640558	R	NA	C4orf34	NM_174921	TSS200	chr4:39640156-39640923	Island
cg09797031	-0.578068695	0.149348544	-3.870601477	0.000108567	-0.871	-0.285	0.036807378	I	Grn	1	231473707	R	NA	C1orf124;C1orf124;EXOC8;C1orf124;C1orf124	NM_032018;NM_001010984;NM_175876;NM_032018;NM_001010984	5'UTR;1stExon;TSS200;1stExon;5'UTR	chr1:231473012-231474382	Island
cg09797577	-0.226088223	0.061171449	-3.695976272	0.000219043	-0.346	-0.106	0.044929537	I	Grn	6	28778226	F	NA	NA	NA	NA	chr6:28781857-28782302	N_Shelf
cg09800118	-0.235801395	0.061971833	-3.804976947	0.000141817	-0.357	-0.114	0.039368142	I	Red	1	154244834	F	rs1194594	HAX1;HAX1	NM_006118;NM_001018837	TSS1500;TSS1500	chr1:154244710-154245289	Island
cg09805553	-0.477852527	0.115932499	-4.121816829	3.76E-05	-0.705	-0.251	0.029421726	I	Red	1	153895607	F	NA	GATAD2B	NM_020699	TSS200	chr1:153894837-153895921	Island
cg09815927	0.40446506	0.104163365	3.882987646	0.000103181	0.2	0.609	0.036427231	I	Grn	17	655848	F	NA	ELP2P;GEMIN4	NR_024120;NM_015721	TSS200;TSS1500	chr17:655026-656707	Island
cg09817677	-0.309471453	0.07404522	-4.179492651	2.92E-05	-0.455	-0.164	0.028031223	I	Grn	16	57570819	F	NA	CCDC102A	NM_033212	TSS1500	chr16:57569848-57570844	Island
cg09827752	-0.312205847	0.067060075	-4.655614333	3.23E-06	-0.444	-0.181	0.019595269	I	Red	1	2461823	F	NA	HES5	NM_001010926	TSS200	chr1:2460760-2462010	Island
cg09839738	-0.49630338	0.127944705	-3.879045859	0.000104867	-0.747	-0.246	0.036545838	I	Grn	6	161412518	F	NA	MAP3K4;MAP3K4	NM_006724;NM_005922	TSS1500;TSS1500	chr6:161412377-161413564	Island
cg09850601	0.773346714	0.190178357	4.06642862	4.77E-05	0.401	1.146	0.030242045	II	NA	16	67867788	F	NA	CENPT	NM_025082	5'UTR	chr16:67867658-67867898	Island
cg09854653	-0.344285576	0.089792292	-3.834244197	0.000125951	-0.52	-0.168	0.038321768	I	Red	6	163834903	F	NA	QKI;QKI;QKI;QKI	NM_206854;NM_006775;NM_206855;NM_206853	TSS1500;TSS1500;TSS1500;TSS1500	NA	NA
cg09859416	0.626452769	0.141118909	4.439183746	9.03E-06	0.35	0.903	0.020877178	II	NA	12	34262100	F	rs28628472	NA	NA	NA	chr12:34260736-34261698	S_Shore
cg09859805	0.565248232	0.139667339	4.047103905	5.19E-05	0.292	0.839	0.030815587	I	Red	17	79086460	F	NA	BAIAP2;BAIAP2;BAIAP2	NM_006340;NM_001144888;NM_017451	3'UTR;Body;Body	chr17:79086321-79086523	Island
cg09865476	-0.276986035	0.075513284	-3.668043802	0.000244413	-0.425	-0.129	0.046481088	I	Grn	5	154317886	F	NA	GEMIN5	NM_015465	TSS200	chr5:154317459-154317930	Island
cg09872104	-0.367673847	0.101935411	-3.606929544	0.000309842	-0.567	-0.168	0.049960773	I	Red	7	134855509	F	NA	C7orf49;C7orf49;C7orf49;C7orf49	NM_024033;NR_024185;NR_024186;NM_024033	1stExon;Body;Body;5'UTR	chr7:134854975-134855696	Island
cg09880973	-0.268309636	0.067024488	-4.003158305	6.25E-05	-0.4	-0.137	0.032399883	I	Red	6	33359423	F	NA	KIFC1;KIFC1	NM_002263;NM_002263	5'UTR;1stExon	chr6:33359097-33359975	Island
cg09897970	-0.2764659	0.073119553	-3.781011926	0.000156192	-0.42	-0.133	0.040519369	I	Red	16	29757344	R	NA	C16orf54	NM_175900	TSS200	NA	NA
cg09901342	0.360405073	0.093544721	3.852756949	0.000116795	0.177	0.544	0.037634396	I	Grn	13	64418337	R	NA	NA	NA	NA	chr13:64418434-64418679	N_Shore
cg09902251	0.356402129	0.077385425	4.605545903	4.11E-06	0.205	0.508	0.019595269	I	Grn	15	88590236	R	NA	NTRK3;NTRK3;NTRK3	NM_001007156;NM_001012338;NM_002530	Body;Body;Body	NA	NA
cg09905732	0.81666838	0.219942689	3.713096282	0.000204739	0.386	1.248	0.044165261	II	NA	16	928154	F	NA	LMF1	NM_022773	Body	chr16:928142-928380	Island
cg09906488	-0.50051587	0.128668348	-3.88996889	0.000100257	-0.753	-0.248	0.036061114	I	Grn	10	12391008	R	NA	CAMK1D;CAMK1D	NM_020397;NM_153498	TSS1500;TSS1500	chr10:12390802-12392589	Island
cg09919735	0.12883672	0.033706773	3.822279905	0.000132223	0.063	0.195	0.038710152	I	Red	16	54545884	F	NA	NA	NA	NA	NA	NA
cg09928027	0.323357729	0.082556989	3.916782023	8.97E-05	0.162	0.485	0.035165173	I	Red	16	88945708	R	NA	CBFA2T3;CBFA2T3	NM_175931;NM_005187	Body;Body	chr16:88945617-88945861	Island
cg09934326	0.448103896	0.123507229	3.628159246	0.000285449	0.206	0.69	0.048713332	II	NA	1	43832826	F	NA	ELOVL1	NM_022821	5'UTR	chr1:43832814-43833073	Island
cg09938328	-0.448447309	0.120026387	-3.736239339	0.000186793	-0.684	-0.213	0.042787476	I	Red	1	39325620	F	NA	RRAGC	NM_022157	TSS1500	chr1:39324815-39325721	Island
cg09939344	0.303672531	0.08283497	3.665994346	0.000246379	0.141	0.466	0.046508608	I	Red	17	77987302	R	NA	TBC1D16	NM_019020	Body	chr17:77983980-77984482	S_Shelf
cg09974041	0.240354441	0.062789063	3.827966657	0.000129206	0.117	0.363	0.038626384	I	Red	8	10273890	F	NA	MSRA;MSRA;MSRA	NM_001135671;NM_001135670;NM_012331	Body;Body;Body	NA	NA
cg10004882	0.284894816	0.066131362	4.308013748	1.65E-05	0.155	0.415	0.024222597	I	Red	10	128830453	F	NA	DOCK1	NM_001380	Body	NA	NA
cg10018216	0.57304708	0.146972626	3.899005518	9.66E-05	0.285	0.861	0.035664673	I	Red	16	1487596	F	NA	CCDC154	NM_001143980	Body	chr16:1487017-1487260	S_Shore
cg10024138	0.624065588	0.142355627	4.383849114	1.17E-05	0.345	0.903	0.022914927	II	NA	10	135158947	F	rs77290480	NA	NA	NA	NA	NA
cg10034642	0.795786695	0.210562428	3.779338519	0.000157246	0.383	1.208	0.040608825	II	NA	16	791241	R	NA	NARFL	NM_022493	TSS1500	chr16:790626-791332	Island
cg10056356	-0.395177448	0.094853441	-4.16618991	3.10E-05	-0.581	-0.209	0.028404729	I	Red	4	144621898	R	NA	FREM3	NM_001168235	TSS200	chr4:144620822-144622218	Island
cg10057528	0.225815675	0.062266979	3.626571855	0.000287209	0.104	0.348	0.048794813	I	Red	1	2116747	F	rs71675962	C1orf86;PRKCZ;PRKCZ;PRKCZ	NM_001146310;NM_001033582;NM_001033581;NM_002744	Body;3'UTR;3'UTR;3'UTR	chr1:2116432-2116801	Island
cg10075260	-0.19766485	0.048846946	-4.046616321	5.20E-05	-0.293	-0.102	0.030842066	I	Red	4	175205333	R	NA	KIAA1712;FBXO8;KIAA1712;FBXO8	NM_001145314;NM_012180;NM_001040157;NM_012180	5'UTR;1stExon;5'UTR;5'UTR	chr4:175204565-175205395	Island
cg10079867	0.306571748	0.076158011	4.025469468	5.69E-05	0.157	0.456	0.031685944	I	Red	2	241905868	F	NA	NA	NA	NA	chr2:241905704-241905911	Island
cg10092158	-0.672500142	0.170829786	-3.936667936	8.26E-05	-1.007	-0.338	0.034627589	I	Grn	1	151584907	R	NA	SNX27	NM_030918	1stExon	chr1:151584374-151585205	Island
cg10112694	0.373590445	0.083861832	4.454832845	8.40E-06	0.209	0.538	0.020877178	I	Grn	10	134619466	F	NA	NA	NA	NA	chr10:134621072-134621372	N_Shore
cg10113414	0.485312629	0.127713849	3.800000035	0.000144696	0.235	0.736	0.039603133	II	NA	4	209682	R	NA	ZNF876P	NR_027481	Body	chr4:206377-206892	S_Shelf
cg10133465	-0.47537793	0.113556933	-4.18625192	2.84E-05	-0.698	-0.253	0.027816265	I	Red	8	97166862	R	NA	GDF6	NM_001001557	Body	chr8:97169731-97170432	N_Shelf
cg10137463	-0.246409434	0.060744975	-4.056457902	4.98E-05	-0.365	-0.127	0.030412231	I	Red	15	23085908	F	NA	NIPA1;NIPA1	NM_144599;NM_001142275	Body;5'UTR	chr15:23085441-23086898	Island
cg10152447	0.221457439	0.059229486	3.738972814	0.000184774	0.105	0.338	0.042622298	II	NA	4	16324929	R	NA	NA	NA	NA	NA	NA
cg10162958	0.339183431	0.08398822	4.038464344	5.38E-05	0.175	0.504	0.031107885	I	Red	13	113673671	F	rs2993300	MCF2L;MCF2L	NM_001112732;NM_024979	Body;Body	chr13:113676781-113677120	N_Shelf
cg10163338	0.369459559	0.09807367	3.767163602	0.000165113	0.177	0.562	0.041297938	I	Red	16	85519308	F	NA	NA	NA	NA	chr16:85519109-85519357	Island
cg10187692	0.302715771	0.075380841	4.015818425	5.92E-05	0.155	0.45	0.032064281	I	Grn	8	100872131	F	NA	VPS13B;VPS13B	NM_017890;NM_152564	Body;Body	NA	NA
cg10201191	0.3416292	0.075979899	4.496310235	6.91E-06	0.193	0.491	0.020594892	I	Red	1	3163472	F	NA	PRDM16;PRDM16	NM_022114;NM_199454	Body;Body	chr1:3163969-3164643	N_Shore
cg10201807	-0.568530889	0.141842203	-4.008192757	6.12E-05	-0.847	-0.291	0.032349334	I	Red	5	94621055	R	NA	MCTP1	NM_024717	TSS1500	chr5:94619459-94621121	Island
cg10203375	-0.174196077	0.047279005	-3.684427738	0.000229217	-0.267	-0.082	0.04538647	I	Red	1	211307178	F	NA	KCNH1;KCNH1	NM_002238;NM_172362	Body;Body	chr1:211306667-211307675	Island
cg10203483	0.953034322	0.262845579	3.625833565	0.000288031	0.438	1.468	0.04882777	II	NA	2	85646239	R	NA	NA	NA	NA	chr2:85645343-85645879	S_Shore
cg10217472	0.47136261	0.129066873	3.652080509	0.000260124	0.218	0.724	0.047124429	I	Grn	16	88181642	F	rs28481621	NA	NA	NA	chr16:88184856-88185101	N_Shelf
cg10224311	0.251873011	0.067051351	3.756419621	0.000172362	0.12	0.383	0.041904669	I	Grn	22	35817371	R	NA	MCM5	NM_006739	Body	chr22:35820095-35820302	N_Shelf
cg10238302	0.403673165	0.104057843	3.879315136	0.000104751	0.2	0.608	0.036545838	I	Grn	2	109513151	F	NA	EDAR	NM_022336	3'UTR	NA	NA
cg10241675	0.183560071	0.050824406	3.611652094	0.000304253	0.084	0.283	0.049602872	II	NA	13	31942320	F	NA	NA	NA	NA	NA	NA
cg10242318	0.480263766	0.129451477	3.709990623	0.000207267	0.227	0.734	0.044165261	I	Red	2	233385248	R	NA	NA	NA	NA	chr2:233386614-233389161	N_Shore
cg10243292	-0.136430356	0.035221549	-3.873491025	0.000107287	-0.205	-0.067	0.036737788	I	Red	6	89673517	F	NA	RNGTT	NM_003800	TSS200	chr6:89672884-89673579	Island
cg10245697	-0.30206246	0.075212162	-4.016138494	5.92E-05	-0.449	-0.155	0.032060207	I	Red	20	3869582	R	NA	PANK2;PANK2;PANK2	NM_024960;NM_153640;NM_153638	5'UTR;TSS1500;TSS200	chr20:3869453-3870570	Island
cg10259701	-0.372786121	0.09856902	-3.781980597	0.000155585	-0.566	-0.18	0.040478954	I	Red	15	31645503	F	NA	KLF13	NM_015995	Body	NA	NA
cg10275695	-0.130525733	0.033010276	-3.95409389	7.68E-05	-0.195	-0.066	0.033814795	II	NA	19	47975487	F	NA	SLC8A2	NM_015063	TSS200	NA	NA
cg10293804	-0.293034332	0.077134689	-3.798995462	0.000145284	-0.444	-0.142	0.039694432	II	NA	16	3068529	F	NA	CLDN6	NM_021195	TSS1500	chr16:3070095-3071305	N_Shore
cg10314909	0.348855012	0.085348505	4.087417943	4.36E-05	0.182	0.516	0.029828277	I	Red	1	2524890	R	NA	MMEL1	NM_033467	Body	chr1:2527239-2527503	N_Shelf
cg10328259	0.418429036	0.102576434	4.079192661	4.52E-05	0.217	0.619	0.030015649	I	Red	2	3321226	R	NA	TSSC1	NM_003310	Body	chr2:3321063-3321293	Island
cg10330885	0.206471982	0.050737956	4.069379197	4.71E-05	0.107	0.306	0.030242045	II	NA	16	88729968	R	NA	MGC23284;MVD;MGC23284	NR_024399;NM_002461;NR_024402	Body;TSS1500;Body	chr16:88729108-88730410	Island
cg10331424	0.407758473	0.111482418	3.657603402	0.000254585	0.189	0.626	0.04678312	I	Red	16	70696450	F	NA	MTSS1L	NM_138383	3'UTR	chr16:70697574-70698363	N_Shore
cg10338338	0.550158173	0.138495597	3.972387447	7.12E-05	0.279	0.822	0.033038921	II	NA	12	8088931	R	NA	SLC2A3	NM_006931	TSS200	NA	NA
cg10342490	0.274566278	0.075592617	3.632183787	0.000281033	0.126	0.423	0.048642645	I	Grn	11	106698562	R	NA	GUCY1A2	NM_000855	Body	NA	NA
cg10343901	-0.540240149	0.133026862	-4.061135783	4.88E-05	-0.801	-0.28	0.030242045	I	Grn	11	73472211	F	NA	RAB6A;RAB6A	NM_002869;NM_198896	TSS200;TSS200	chr11:73471275-73472483	Island
cg10345522	0.409855185	0.095518361	4.290852341	1.78E-05	0.223	0.597	0.024222597	I	Red	14	105169673	R	NA	INF2;INF2;INF2	NM_022489;NM_032714;NM_001031714	Body;Body;Body	chr14:105167663-105168129	S_Shore
cg10376598	-0.215166731	0.05931287	-3.627656708	0.000286005	-0.331	-0.099	0.048713332	I	Red	19	19739411	F	NA	LPAR2	NM_004720	TSS1500	chr19:19738572-19739821	Island
cg10387458	-0.248676688	0.067009468	-3.711067919	0.000206387	-0.38	-0.117	0.044165261	I	Red	1	93645817	F	NA	TMED5;TMED5;TMED5;CCDC18;TMED5;TMED5	NM_001167830;NR_030761;NM_016040;NM_206886;NM_001167830;NM_016040	1stExon;Body;1stExon;TSS200;5'UTR;5'UTR	chr1:93645432-93646471	Island
cg10409230	0.229346339	0.062404626	3.675149666	0.00023771	0.107	0.352	0.045912367	I	Red	17	40318360	F	NA	KCNH4	NM_012285	Body	NA	NA
cg10431481	-0.21538402	0.058863615	-3.659034887	0.000253167	-0.331	-0.1	0.046775024	I	Grn	1	45249875	F	NA	BEST4	NM_153274	3'UTR	chr1:45249860-45250352	Island
cg10445911	-0.309382612	0.08387587	-3.688577071	0.000225512	-0.474	-0.145	0.045113145	I	Red	1	154971922	F	NA	NA	NA	NA	chr1:154971870-154972404	Island
cg10454187	0.277129622	0.064828867	4.274787393	1.91E-05	0.15	0.404	0.024380182	I	Grn	16	1451554	F	NA	UNKL	NM_001037125	Body	chr16:1449295-1449545	S_Shelf
cg10471356	0.242106161	0.066022304	3.667035948	0.000245378	0.113	0.372	0.046481088	I	Red	13	113382760	R	NA	ATP11A;ATP11A	NM_015205;NM_032189	Body;Body	chr13:113382598-113383007	Island
cg10481660	-0.325956088	0.087237957	-3.736402113	0.000186672	-0.497	-0.155	0.042787476	I	Red	7	155249746	R	NA	EN2	NM_001427	TSS1500	chr7:155246390-155251955	Island
cg10492999	0.329220218	0.071826698	4.583535503	4.57E-06	0.188	0.47	0.019595269	I	Red	16	3063894	R	NA	CLDN9	NM_020982	1stExon	chr16:3063679-3063981	Island
cg10498984	-0.597731029	0.164894526	-3.624929478	0.00028904	-0.921	-0.275	0.04893789	I	Red	16	28874827	F	NA	SH2B1;SH2B1;SH2B1;SH2B1;SH2B1	NM_001145812;NM_001145795;NM_001145796;NM_015503;NM_001145797	TSS1500;TSS1500;TSS1500;TSS1500;TSS1500	chr16:28874665-28875558	Island
cg10502150	0.5816826	0.149749019	3.884383374	0.00010259	0.288	0.875	0.036409823	II	NA	17	8242124	R	NA	ODF4	NM_153007	TSS1500	NA	NA
cg10513480	-0.196205532	0.052316492	-3.750357207	0.000176583	-0.299	-0.094	0.042087917	I	Red	14	21852135	F	rs28364671	SUPT16H;SUPT16H	NM_007192;NM_007192	5'UTR;1stExon	chr14:21851498-21852550	Island
cg10517474	-0.37699162	0.079735661	-4.728017716	2.27E-06	-0.533	-0.221	0.019288532	I	Red	16	31470676	F	NA	ARMC5;ARMC5;ARMC5;ARMC5	NM_024742;NM_001105247;NM_024742;NM_001105247	5'UTR;1stExon;1stExon;5'UTR	chr16:31469982-31471302	Island
cg10519709	-0.643153409	0.150330837	-4.278253355	1.88E-05	-0.938	-0.349	0.024380182	I	Red	1	204347359	F	NA	NA	NA	NA	chr1:204346732-204347430	Island
cg10526659	-0.552437534	0.135825102	-4.067271275	4.76E-05	-0.819	-0.286	0.030242045	I	Red	2	182322058	F	rs6741016	ITGA4;ITGA4	NM_000885;NM_000885	5'UTR;1stExon	chr2:182321761-182323029	Island
cg10532912	0.930149206	0.222642613	4.177768096	2.94E-05	0.494	1.367	0.028079913	II	NA	2	242447341	F	rs28364816	STK25	NM_006374	Body	chr2:242447017-242448558	Island
cg10533331	0.337099448	0.089151557	3.781195307	0.000156077	0.162	0.512	0.040519369	I	Red	15	38857695	F	NA	RASGRP1;RASGRP1	NM_001128602;NM_005739	TSS1500;TSS1500	chr15:38856262-38857658	S_Shore
cg10576257	-0.398390144	0.110349863	-3.610245914	0.000305907	-0.615	-0.182	0.049660139	I	Red	2	75428132	F	NA	TACR1;TACR1	NM_015727;NM_001058	TSS1500;TSS1500	chr2:75426592-75428030	S_Shore
cg10606822	-0.398403106	0.104820974	-3.800795693	0.000144232	-0.604	-0.193	0.039603133	I	Red	17	4613428	R	NA	ARRB2;ARRB2	NM_199004;NM_004313	TSS1500;TSS1500	chr17:4613400-4614423	Island
cg10624784	-0.267905678	0.068557438	-3.907755125	9.32E-05	-0.402	-0.134	0.0355295	I	Red	7	77427913	F	rs74847558	PHTF2;PHTF2;TMEM60	NM_001127360;NM_001127358;NM_032936	TSS200;TSS200;TSS200	chr7:77427331-77428850	Island
cg10635912	-0.389144644	0.101841766	-3.821071231	0.000132873	-0.589	-0.19	0.038710152	I	Red	19	10305863	R	NA	DNMT1;DNMT1	NM_001130823;NM_001379	TSS200;TSS200	chr19:10304966-10305864	Island
cg10639613	0.328886489	0.088652941	3.709820416	0.000207406	0.155	0.503	0.044165261	I	Red	4	2829025	R	NA	SH3BP2;SH3BP2;SH3BP2;SH3BP2	NM_001122681;NM_001145855;NM_003023;NM_001145856	Body;Body;Body;Body	NA	NA
cg10651618	0.239500395	0.066356198	3.6093146	0.000307007	0.109	0.37	0.049768158	I	Grn	6	90122152	F	NA	RRAGD	NM_021244	TSS200	chr6:90120874-90122370	Island
cg10655629	0.368279975	0.094377744	3.9021909	9.53E-05	0.183	0.553	0.035628855	I	Red	5	480253	F	NA	SLC9A3	NM_004174	Body	chr5:481639-482225	N_Shore
cg10657806	-0.330007788	0.080275652	-4.110932517	3.94E-05	-0.487	-0.173	0.029421726	I	Grn	12	117348826	R	NA	FBXW8;FBXW8;FBXW8;FBXW8	NM_012174;NM_012174;NM_153348;NM_153348	1stExon;5'UTR;5'UTR;1stExon	chr12:117348645-117349207	Island
cg10658706	-0.280716413	0.077345449	-3.629385016	0.000284097	-0.432	-0.129	0.048713332	I	Red	11	93517407	F	rs74691257	MED17;MED17	NM_004268;NM_004268	5'UTR;1stExon	chr11:93517309-93518130	Island
cg10660916	-0.541108739	0.143347778	-3.774796848	0.000160138	-0.822	-0.26	0.040856004	I	Grn	19	17984643	R	NA	SLC5A5	NM_000453	Body	chr19:17984642-17985133	Island
cg10673839	-0.283824623	0.072104985	-3.936269102	8.28E-05	-0.425	-0.143	0.034627589	I	Red	12	132313626	R	NA	MMP17	NM_016155	Body	chr12:132312439-132315739	Island
cg10680264	-0.444089024	0.094044385	-4.722121608	2.33E-06	-0.628	-0.26	0.019288532	I	Grn	15	75470927	F	NA	NA	NA	NA	chr15:75470911-75471212	Island
cg10683054	-0.192295603	0.04549453	-4.226785123	2.37E-05	-0.281	-0.103	0.025998984	I	Red	6	132129037	R	NA	ENPP1	NM_006208	TSS200	chr6:132128727-132129563	Island
cg10692753	0.243160074	0.065129593	3.733480628	0.000188852	0.116	0.371	0.042998782	II	NA	16	23464628	F	NA	COG7	NM_153603	TSS200	chr16:23463990-23464629	Island
cg10709026	0.247410366	0.06429974	3.847766211	0.0001192	0.121	0.373	0.037898973	I	Grn	17	3716247	F	rs77418274	C17orf85;C17orf85	NM_018553;NM_001114118	3'UTR;3'UTR	NA	NA
cg10733978	0.301831958	0.080167271	3.765027215	0.000166531	0.145	0.459	0.041454224	I	Grn	13	113742972	F	NA	MCF2L;MCF2L	NM_001112732;NM_024979	Body;Body	chr13:113742736-113743019	Island
cg10741568	0.559757395	0.109627777	5.105981431	3.29E-07	0.345	0.775	0.014683708	II	NA	13	49546137	R	NA	NA	NA	NA	chr13:49549822-49551042	N_Shelf
cg10750945	-0.179933936	0.049245309	-3.653828935	0.000258358	-0.276	-0.083	0.047032666	I	Red	10	88280693	F	NA	WAPAL	NM_015045	5'UTR	chr10:88280635-88282089	Island
cg10771518	-0.916450523	0.230023145	-3.984166567	6.77E-05	-1.367	-0.466	0.032844427	I	Red	10	115439279	F	NA	CASP7;CASP7;CASP7;CASP7	NM_033340;NM_033338;NM_001227;NM_033339	5'UTR;TSS200;TSS200;TSS200	chr10:115439007-115440196	Island
cg10788217	-0.345740091	0.078858736	-4.384296662	1.16E-05	-0.5	-0.191	0.022914927	I	Grn	11	113185148	F	NA	TTC12	NM_017868	TSS200	chr11:113185332-113185663	N_Shore
cg10788918	-0.576057858	0.137351897	-4.194029136	2.74E-05	-0.845	-0.307	0.027433206	I	Red	3	49142251	R	NA	QARS	NM_005051	TSS200	chr3:49141934-49142373	Island
cg10792225	-0.454274746	0.113597993	-3.998968055	6.36E-05	-0.677	-0.232	0.032587381	I	Grn	6	33359574	R	NA	KIFC1;KIFC1	NM_002263;NM_002263	5'UTR;1stExon	chr6:33359097-33359975	Island
cg10793234	0.464931546	0.128618831	3.61480153	0.000300578	0.213	0.717	0.04944806	I	Red	3	194062061	F	NA	CPN2	NM_001080513	Body	NA	NA
cg10812016	0.252740042	0.067853978	3.724763815	0.000195498	0.12	0.386	0.043426453	I	Grn	7	155385272	R	NA	NA	NA	NA	NA	NA
cg10831684	0.252396645	0.06134798	4.114180169	3.89E-05	0.132	0.373	0.029421726	I	Red	11	66807539	F	rs11227664	SYT12	NM_177963	Body	NA	NA
cg10845200	-0.667253725	0.163295439	-4.086174901	4.39E-05	-0.987	-0.347	0.029853922	I	Grn	10	135150485	R	NA	CALY	NM_015722	TSS200	chr10:135148196-135150565	Island
cg10851992	0.537054101	0.142992159	3.755829019	0.000172769	0.257	0.817	0.041921827	II	NA	17	40169183	F	NA	DNAJC7;NKIRAS2;DNAJC7;DNAJC7	NM_001144766;NM_001001349;NR_029431;NM_003315	TSS200;TSS1500;Body;Body	chr17:40168999-40169694	Island
cg10877458	0.27600785	0.072945937	3.78373166	0.000154494	0.133	0.419	0.040478954	II	NA	6	166797417	R	NA	BRP44L	NM_016098	TSS1500	chr6:166795368-166797301	S_Shore
cg10877979	0.547589843	0.149335123	3.666852324	0.000245555	0.255	0.84	0.046481088	II	NA	12	131569407	R	NA	GPR133	NM_198827	Body	chr12:131572501-131572945	N_Shelf
cg10896616	-0.305401206	0.083459494	-3.659274604	0.00025293	-0.469	-0.142	0.046763384	I	Red	5	1295267	R	NA	TERT;TERT	NM_198255;NM_198253	TSS200;TSS200	chr5:1289275-1295970	Island
cg10906810	0.282491074	0.070328407	4.016742106	5.90E-05	0.145	0.42	0.032046094	I	Red	13	114837697	F	rs72659557	RASA3	NM_007368	Body	chr13:114838658-114839092	N_Shore
cg10914727	-0.30649104	0.078032042	-3.927758787	8.57E-05	-0.459	-0.154	0.034883186	I	Red	5	132759700	R	NA	FSTL4	NM_015082	Body	NA	NA
cg10941174	-0.38844054	0.092112973	-4.217001421	2.48E-05	-0.569	-0.208	0.026359513	II	NA	7	146842348	F	NA	CNTNAP2	NM_014141	Body	NA	NA
cg10948827	0.781671219	0.19373536	4.034736974	5.47E-05	0.402	1.161	0.031154115	II	NA	1	22929080	R	NA	EPHA8	NM_020526	3'UTR	chr1:22927145-22927542	S_Shore
cg10976478	0.365385036	0.100876741	3.622093984	0.000292228	0.168	0.563	0.049074099	II	NA	2	241263838	F	rs73111981	NA	NA	NA	chr2:241262311-241262759	S_Shore
cg10985993	-0.370207953	0.097964005	-3.779020202	0.000157447	-0.562	-0.178	0.040639149	I	Red	2	166810260	F	NA	TTC21B;TTC21B	NM_024753;NM_024753	1stExon;5'UTR	chr2:166809970-166810826	Island
cg10992590	-0.598823759	0.150186306	-3.987206125	6.69E-05	-0.893	-0.304	0.032754148	I	Red	2	130940487	R	NA	SMPD4;SMPD4;SMPD4;SMPD4;SMPD4;SMPD4;FAM128B;SMPD4	NR_033231;NR_033230;NM_017951;NM_001171083;NM_017751;NM_001171084;NM_025029;NR_033232	TSS200;TSS200;TSS200;TSS200;TSS200;TSS200;Body;TSS200	chr2:130938840-130940428	S_Shore
cg10996070	0.634386218	0.162675402	3.899705864	9.63E-05	0.316	0.953	0.035664673	II	NA	17	43025229	R	NA	KIF18B	NM_001080443	TSS200	chr17:43024658-43025344	Island
cg11005562	0.263851548	0.071935747	3.667878032	0.000244572	0.123	0.405	0.046481088	I	Red	14	65746824	F	rs4902380	NA	NA	NA	chr14:65746329-65746972	Island
cg11012953	0.491106203	0.122686096	4.002949163	6.26E-05	0.251	0.732	0.032399883	II	NA	6	30434412	F	rs7761083	NA	NA	NA	chr6:30434029-30434422	Island
cg11017269	-0.434403347	0.104874709	-4.142117319	3.44E-05	-0.64	-0.229	0.029154396	I	Grn	5	95067136	F	NA	RHOBTB3;RHOBTB3	NM_014899;NM_014899	1stExon;5'UTR	chr5:95066876-95067812	Island
cg11071401	-0.559783796	0.154123417	-3.632048953	0.00028118	-0.862	-0.258	0.048642645	I	Grn	17	48637194	F	NA	CACNA1G;CACNA1G;CACNA1G;CACNA1G;CACNA1G;CACNA1G;CACNA1G;CACNA1G;CACNA1G;CACNA1G;CACNA1G;CACNA1G;CACNA1G;CACNA1G;CACNA1G	NM_198384;NM_198397;NM_198396;NM_198379;NM_198383;NM_198380;NM_198387;NM_198378;NM_198377;NM_198386;NM_198376;NM_198385;NM_018896;NM_198388;NM_198382	TSS1500;TSS1500;TSS1500;TSS1500;TSS1500;TSS1500;TSS1500;TSS1500;TSS1500;TSS1500;TSS1500;TSS1500;TSS1500;TSS1500;TSS1500	chr17:48636103-48639279	Island
cg11074549	-0.305630583	0.076624175	-3.988696552	6.64E-05	-0.456	-0.155	0.032754148	I	Red	14	75642944	F	NA	TMED10	NM_006827	Body	chr14:75642864-75643376	Island
cg11105980	-0.382276022	0.089060682	-4.292309626	1.77E-05	-0.557	-0.208	0.024222597	I	Red	13	37393381	F	NA	RFXAP;RFXAP	NM_000538;NM_000538	5'UTR;1stExon	chr13:37393213-37394092	Island
cg11117113	0.785972987	0.217930831	3.606524986	0.000310325	0.359	1.213	0.049990821	I	Red	12	34452605	F	NA	NA	NA	NA	NA	NA
cg11125883	0.311398862	0.082138069	3.791163666	0.000149943	0.15	0.472	0.040236886	I	Grn	12	68729045	R	NA	NA	NA	NA	chr12:68725847-68726475	S_Shelf
cg11129291	0.420791672	0.11426031	3.682745747	0.000230735	0.197	0.645	0.045483044	II	NA	2	136742688	R	NA	DARS	NM_001349	Body	chr2:136742687-136743595	Island
cg11151942	-0.549632802	0.149640367	-3.673024948	0.000239696	-0.843	-0.256	0.046052758	II	NA	7	32802477	R	NA	NA	NA	NA	chr7:32801484-32801972	S_Shore
cg11152298	1.351515668	0.314029001	4.303792526	1.68E-05	0.736	1.967	0.024222597	II	NA	5	142783383	R	NA	NR3C1;NR3C1;NR3C1;NR3C1;NR3C1;NR3C1;NR3C1	NM_001024094;NM_001018076;NM_001018075;NM_001020825;NM_001018077;NM_000176;NM_001018074	TSS200;5'UTR;5'UTR;TSS200;5'UTR;TSS200;5'UTR	chr5:142782071-142785071	Island
cg11163997	0.637936211	0.170217723	3.7477661	0.000178417	0.304	0.972	0.04227347	II	NA	9	137967072	R	NA	OLFM1;OLFM1	NM_006334;NM_014279	TSS200;TSS200	chr9:137967110-137967727	N_Shore
cg11170727	0.826540247	0.227336766	3.635752635	0.00027717	0.381	1.272	0.0483541	II	NA	5	139423015	R	NA	NRG2;NRG2;NRG2;NRG2	NM_004883;NM_013981;NM_013982;NM_013983	TSS200;TSS200;TSS200;TSS200	chr5:139422076-139423150	Island
cg11176889	-0.546878421	0.117222008	-4.665322073	3.08E-06	-0.777	-0.317	0.019595269	I	Red	7	32997094	R	NA	FKBP9;FKBP9	NM_007270;NM_007270	1stExon;5'UTR	chr7:32996732-32997591	Island
cg11179286	-0.267963268	0.072247347	-3.708970342	0.000208104	-0.41	-0.126	0.044203145	I	Red	13	115047994	R	NA	UPF3A;UPF3A	NM_023011;NM_080687	Body;Body	chr13:115046754-115048034	Island
cg11188679	0.252700231	0.061343385	4.119437348	3.80E-05	0.132	0.373	0.029421726	I	Grn	14	100795937	R	NA	C14orf68	NM_207117	Body	chr14:100795618-100796001	Island
cg11196904	-0.238011775	0.061053202	-3.8984323	9.68E-05	-0.358	-0.118	0.035664673	I	Red	1	10491304	R	NA	APITD1;APITD1;APITD1;APITD1	NM_199294;NM_199295;NM_199295;NM_198544	Body;5'UTR;1stExon;Body	chr1:10490200-10491072	S_Shore
cg11200568	0.532150405	0.130862317	4.066490791	4.77E-05	0.276	0.789	0.030242045	I	Red	7	226540	F	NA	FAM20C	NM_020223	Body	chr7:223970-225989	S_Shore
cg11203927	1.146223434	0.299249741	3.830323901	0.000127975	0.56	1.733	0.038586172	II	NA	22	41032991	F	NA	MKL1	NM_020831	TSS1500	chr22:41032129-41033272	Island
cg11210004	0.743366593	0.191793819	3.875863129	0.000106247	0.367	1.119	0.036636073	I	Grn	10	135095303	F	NA	TUBGCP2	NM_006659	Body	chr10:135097516-135097801	N_Shelf
cg11219883	0.370424985	0.101361986	3.654476401	0.000257707	0.172	0.569	0.047012824	I	Grn	12	130501758	R	NA	NA	NA	NA	NA	NA
cg11221922	0.45816981	0.121486885	3.771352029	0.000162365	0.22	0.696	0.041078876	II	NA	6	28678391	F	rs34115785	NA	NA	NA	NA	NA
cg11224624	-0.235045524	0.057297216	-4.102215423	4.09E-05	-0.347	-0.123	0.029421726	I	Red	8	145049280	F	NA	PLEC1	NM_000445	Body	chr8:145047293-145052305	Island
cg11229230	0.20316996	0.053375226	3.806446815	0.000140978	0.099	0.308	0.039368142	I	Red	2	112944829	F	NA	FBLN7;FBLN7	NM_153214;NM_001128165	Body;Body	chr2:112944811-112945022	Island
cg11237426	-0.727390387	0.178710341	-4.070219904	4.70E-05	-1.078	-0.377	0.030242045	I	Grn	1	179545166	F	NA	NPHS2	NM_014625	TSS200	chr1:179544720-179545307	Island
cg11267683	0.280458446	0.075262441	3.72640644	0.000194229	0.133	0.428	0.043408875	I	Red	17	76501381	F	NA	DNAH17	NM_173628	Body	chr17:76498807-76499075	S_Shelf
cg11277148	-0.361484264	0.096467368	-3.747218071	0.000178807	-0.551	-0.172	0.042326491	I	Grn	8	26371569	F	NA	PNMA2	NM_007257	TSS200	chr8:26371172-26372830	Island
cg11279691	0.315967291	0.085176891	3.709542424	0.000207634	0.149	0.483	0.04417567	I	Red	17	75237915	F	NA	NA	NA	NA	NA	NA
cg11281249	-0.575456826	0.148602227	-3.872464355	0.00010774	-0.867	-0.284	0.036737788	I	Red	2	198570061	F	NA	MARS2	NM_138395	TSS200	chr2:198569911-198570948	Island
cg11301069	-0.206224304	0.053970099	-3.821084411	0.000132866	-0.312	-0.1	0.038710152	I	Red	17	8027502	F	NA	HES7;HES7	NM_032580;NM_001165967	TSS200;TSS200	chr17:8028781-8029012	N_Shore
cg11310125	-0.437692365	0.101345359	-4.318820034	1.57E-05	-0.636	-0.239	0.024222597	I	Red	2	113239311	F	NA	TTL	NM_153712	TSS1500	chr2:113239249-113240584	Island
cg11312462	0.258865599	0.069615862	3.718485866	0.000200421	0.122	0.395	0.043708839	I	Red	17	10213042	R	NA	MYH13	NM_003802	Body	NA	NA
cg11330469	0.137361849	0.033819623	4.061602074	4.87E-05	0.071	0.204	0.030242045	I	Red	11	60501024	F	NA	NA	NA	NA	NA	NA
cg11335264	0.152893804	0.035446373	4.313383569	1.61E-05	0.083	0.222	0.024222597	II	NA	1	19806843	F	rs6662021	CAPZB	NM_004930	Body	NA	NA
cg11352866	-0.40201105	0.09649893	-4.165963797	3.10E-05	-0.591	-0.213	0.028404729	I	Grn	5	176057089	F	NA	SNCB;EIF4E1B;SNCB	NM_003085;NM_001099408;NM_001001502	5'UTR;TSS1500;5'UTR	chr5:176056520-176057494	Island
cg11364273	-0.389622575	0.097210389	-4.00803433	6.12E-05	-0.58	-0.199	0.032349334	I	Red	11	63768032	R	NA	MACROD1	NM_014067	Body	chr11:63766058-63768666	Island
cg11395536	-0.313352445	0.082655568	-3.791062755	0.000150004	-0.475	-0.151	0.040236886	I	Red	1	150521958	R	NA	ADAMTSL4;ADAMTSL4;ADAMTSL4;ADAMTSL4	NM_019032;NM_019032;NM_025008;NM_025008	1stExon;5'UTR;1stExon;5'UTR	chr1:150521349-150522368	Island
cg11397493	0.205500506	0.053277562	3.85716799	0.000114708	0.101	0.31	0.037485912	I	Red	1	3307215	R	NA	PRDM16;PRDM16	NM_022114;NM_199454	Body;Body	chr1:3307069-3307285	Island
cg11404129	0.41246659	0.099551142	4.143263281	3.42E-05	0.217	0.608	0.029154396	I	Red	1	150484766	R	NA	ECM1;ECM1	NM_004425;NM_022664	Body;Body	chr1:150488036-150488416	N_Shelf
cg11404544	0.467493681	0.10325759	4.527450998	5.97E-06	0.265	0.67	0.020026345	I	Red	1	50571816	F	rs61685094	ELAVL4;ELAVL4;ELAVL4	NM_001144777;NM_001144776;NM_001144775	Body;Body;TSS200	NA	NA
cg11405617	0.495736752	0.12961003	3.824833236	0.000130861	0.242	0.75	0.038669756	II	NA	7	6541332	F	rs7791451	GRID2IP	NM_001145118	Body	chr7:6543015-6543598	N_Shore
cg11413751	-0.28305593	0.062223585	-4.54901355	5.39E-06	-0.405	-0.161	0.019824328	I	Grn	19	45458585	R	NA	CLPTM1	NM_001294	TSS200	chr19:45458213-45459083	Island
cg11430096	0.333740572	0.088422606	3.774380655	0.000160406	0.16	0.507	0.040859853	II	NA	6	110968061	F	NA	CDK19	NM_015076	Body	chr6:110967011-110967823	S_Shore
cg11435466	0.511934734	0.130540428	3.921656631	8.79E-05	0.256	0.768	0.034883186	II	NA	11	60738032	F	NA	CD6	NM_006725	TSS1500	NA	NA
cg11437784	-0.291950522	0.078361104	-3.725707111	0.000194768	-0.446	-0.138	0.04341709	I	Red	13	112710823	F	NA	NA	NA	NA	chr13:112709884-112712665	Island
cg11450715	-0.279468428	0.076705491	-3.643395318	0.000269065	-0.43	-0.129	0.047777671	I	Red	2	171627404	F	NA	NA	NA	NA	chr2:171627225-171628062	Island
cg11464464	0.469432469	0.120243026	3.904030737	9.46E-05	0.234	0.705	0.035550511	II	NA	5	68513891	R	NA	MRPS36	NM_033281	Body	chr5:68513514-68514200	Island
cg11517528	0.417765878	0.112611557	3.709795779	0.000207426	0.197	0.638	0.044165261	I	Grn	2	128101564	F	NA	MAP3K2	NM_006609	TSS1500	NA	NA
cg11528995	-0.353204905	0.088865822	-3.974586589	7.05E-05	-0.527	-0.179	0.03294454	I	Red	1	117210575	R	NA	IGSF3;IGSF3	NM_001542;NM_001007237	TSS1500;TSS1500	chr1:117209824-117210621	Island
cg11539173	-0.525532056	0.143575875	-3.660308918	0.000251911	-0.807	-0.244	0.046681674	I	Grn	22	19843009	R	NA	GNB1L;C22orf29	NM_053004;NM_024627	TSS1500;TSS1500	chr22:19841883-19843010	Island
cg11539992	-0.26980046	0.068145763	-3.959167075	7.52E-05	-0.403	-0.136	0.033655428	I	Red	17	74497631	R	NA	RHBDF2;RHBDF2	NM_024599;NM_001005498	TSS200;TSS200	chr17:74496992-74497632	Island
cg11573679	-0.342571785	0.091097407	-3.760499844	0.000169574	-0.521	-0.164	0.041598872	I	Red	2	68546467	R	NA	CNRIP1;CNRIP1	NM_001111101;NM_015463	1stExon;1stExon	chr2:68546339-68547111	Island
cg11576436	-0.436781136	0.112660354	-3.876972857	0.000105764	-0.658	-0.216	0.036634949	I	Grn	3	11314015	R	NA	ATG7;ATG7;ATG7;ATG7;ATG7;ATG7	NM_006395;NM_001136031;NM_001136031;NM_006395;NM_001144912;NM_001144912	1stExon;1stExon;5'UTR;5'UTR;1stExon;5'UTR	chr3:11313889-11314137	Island
cg11576834	-0.593231722	0.163926626	-3.618885698	0.000295874	-0.915	-0.272	0.049188294	I	Red	10	50970258	R	NA	OGDHL;OGDHL;OGDHL	NM_001143996;NM_001143997;NM_018245	5'UTR;5'UTR;5'UTR	chr10:50969658-50970605	Island
cg11582617	-0.415643842	0.100304765	-4.143809544	3.42E-05	-0.612	-0.219	0.029154396	I	Red	6	158589302	F	NA	SERAC1;SERAC1;GTF2H5	NM_032861;NM_032861;NM_207118	1stExon;5'UTR;TSS200	chr6:158588887-158589449	Island
cg11586605	-0.550046694	0.144093204	-3.817297972	0.000134921	-0.832	-0.268	0.038947178	I	Grn	11	108535779	R	NA	DDX10	NM_004398	TSS200	chr11:108535584-108536196	Island
cg11588001	-0.289204223	0.077964826	-3.709419199	0.000207735	-0.442	-0.136	0.044177815	I	Red	19	29704240	F	NA	UQCRFS1	NM_006003	TSS200	chr19:29703570-29704331	Island
cg11591516	-0.237440375	0.057726897	-4.113167131	3.90E-05	-0.351	-0.124	0.029421726	I	Red	10	85954316	F	NA	PCDH21	NM_033100	TSS200	chr10:85954199-85955303	Island
cg11598821	0.44288804	0.092758497	4.774635802	1.80E-06	0.261	0.625	0.0186624	I	Red	7	1034817	R	NA	NA	NA	NA	NA	NA
cg11653948	-0.204112127	0.052282266	-3.904041353	9.46E-05	-0.307	-0.102	0.035550511	I	Grn	11	2421970	R	NA	NA	NA	NA	chr11:2421040-2422474	Island
cg11660684	-0.582603831	0.161149364	-3.615303323	0.000299996	-0.898	-0.267	0.04944806	I	Grn	10	126490277	F	NA	FAM175B	NM_032182	TSS200	chr10:126490161-126490934	Island
cg11702172	0.440983539	0.113425338	3.887875014	0.000101126	0.219	0.663	0.036181082	I	Red	5	1749342	R	NA	NA	NA	NA	chr5:1745534-1745851	S_Shelf
cg11721803	-0.487086615	0.107704721	-4.52242587	6.11E-06	-0.698	-0.276	0.020026345	I	Red	12	48398380	F	NA	COL2A1;COL2A1	NM_001844;NM_033150	TSS200;TSS200	chr12:48397889-48398731	Island
cg11729970	-0.182273638	0.043387276	-4.201085052	2.66E-05	-0.267	-0.097	0.027151749	I	Red	10	124639630	R	NA	FAM24B;LOC399815	NM_152644;NR_027282	TSS1500;Body	chr10:124638743-124639793	Island
cg11731606	0.561185047	0.13522357	4.150053484	3.32E-05	0.296	0.826	0.028951683	II	NA	1	43770899	F	NA	TIE1	NM_005424	Body	chr1:43770522-43770880	S_Shore
cg11733430	0.13298248	0.034410531	3.864586673	0.000111277	0.066	0.2	0.037135473	I	Red	6	33262740	F	NA	RGL2;RGL2	NR_028387;NM_004761	Body;Body	chr6:33266302-33267582	N_Shelf
cg11737246	-0.180122358	0.047046196	-3.828627451	0.00012886	-0.272	-0.088	0.038626384	I	Red	15	40401244	R	NA	BMF	NM_001003940	TSS200	chr15:40401053-40401298	Island
cg11742909	-0.300813002	0.080710237	-3.727073723	0.000193716	-0.459	-0.143	0.043381619	I	Red	7	155601876	F	NA	SHH	NM_000193	Body	chr7:155601175-155603235	Island
cg11761572	-0.569281829	0.149238514	-3.814577161	0.000136416	-0.862	-0.277	0.038960227	I	Red	19	39390455	F	NA	SIRT2;NFKBIB;SIRT2;NFKBIB	NM_012237;NM_002503;NM_030593;NM_001001716	TSS200;TSS200;TSS200;TSS200	chr19:39390033-39390895	Island
cg11767392	-1.072295292	0.25415427	-4.219072501	2.45E-05	-1.57	-0.574	0.026175967	I	Red	11	71814388	F	NA	LRTOMT;C11orf59;LRTOMT;LRTOMT	NM_001145308;NM_017907;NM_001145309;NM_001145310	Body;TSS200;Body;Body	chr11:71814203-71814529	Island
cg11769440	-0.323673119	0.082054513	-3.944610806	7.99E-05	-0.484	-0.163	0.03433307	I	Red	6	30294255	F	NA	TRIM39;HCG18;HCG18;TRIM39	NM_021253;NR_024052;NR_024053;NM_172016	TSS1500;Body;Body;TSS1500	chr6:30294169-30295071	Island
cg11789684	-0.212050007	0.057502558	-3.687662136	0.000226324	-0.325	-0.099	0.045145013	I	Red	7	141251045	F	NA	AGK	NM_018238	TSS200	chr7:141251013-141251472	Island
cg11802553	0.687081902	0.184077457	3.732569492	0.000189536	0.326	1.048	0.043041248	II	NA	14	65203330	R	NA	PLEKHG3	NM_015549	Body	NA	NA
cg11802635	0.819295724	0.220154856	3.72145197	0.000198081	0.388	1.251	0.043498886	II	NA	17	4487606	R	NA	SMTNL2;SMTNL2	NM_001114974;NM_198501	TSS1500;5'UTR	chr17:4487398-4488482	Island
cg11804928	0.984013047	0.218822429	4.496856429	6.90E-06	0.555	1.413	0.020594892	II	NA	17	38220298	F	NA	THRA;THRA	NM_003250;NM_199334	5'UTR;5'UTR	chr17:38219084-38219880	S_Shore
cg11826327	0.350269656	0.089531211	3.912263154	9.14E-05	0.175	0.526	0.035204509	I	Grn	11	1669926	F	NA	HCCA2	NM_053005	Body	chr11:1673834-1674224	N_Shelf
cg11839036	0.238337262	0.065781564	3.623161953	0.000291023	0.109	0.367	0.049016605	I	Red	1	22191503	R	NA	HSPG2	NM_005529	Body	chr1:22191349-22191592	Island
cg11843188	-0.37886134	0.104265624	-3.633616944	0.000279476	-0.583	-0.175	0.048529614	I	Red	11	102322558	R	NA	TMEM123	NM_052932	Body	chr11:102322529-102323762	Island
cg11864499	-0.612728459	0.158218731	-3.872666997	0.000107651	-0.923	-0.303	0.036737788	I	Red	4	2936740	F	NA	C4orf10;MFSD10;MFSD10	NR_015453;NM_001146069;NM_001120	TSS1500;TSS200;TSS1500	chr4:2935461-2936974	Island
cg11882053	0.165052035	0.04391541	3.758408131	0.000170998	0.079	0.251	0.041719339	I	Red	13	48890459	R	NA	RB1	NM_000321	Body	chr13:48890957-48891549	N_Shore
cg11902641	0.427025265	0.092393228	4.621824279	3.80E-06	0.246	0.608	0.019595269	I	Grn	6	1418924	R	NA	NA	NA	NA	NA	NA
cg11914659	1.486095707	0.329863142	4.505188727	6.63E-06	0.84	2.133	0.020594892	II	NA	5	180670379	R	NA	GNB2L1;SNORD96A;SNORD95	NM_006098;NR_002592;NR_002591	Body;TSS1500;TSS200	chr5:180670373-180670996	Island
cg11942622	0.223353789	0.054588224	4.091611203	4.28E-05	0.116	0.33	0.029727933	I	Red	15	79298659	F	NA	RASGRF1;RASGRF1;RASGRF1	NM_153815;NM_001145648;NM_002891	TSS1500;Body;Body	NA	NA
cg11948252	0.319126279	0.077403421	4.122896325	3.74E-05	0.167	0.471	0.029421726	I	Red	1	160771900	F	NA	LY9;LY9	NM_001033667;NM_002348	3'UTR;Body	chr1:160771683-160771953	Island
cg11963202	0.336576565	0.092747458	3.62895729	0.000284568	0.155	0.518	0.048713332	I	Grn	7	98985799	F	NA	ARPC1B	NM_005720	Body	NA	NA
cg11967563	0.207179982	0.053345326	3.883751373	0.000102857	0.103	0.312	0.036427231	I	Red	10	3186147	R	NA	PITRM1	NM_014889	Body	NA	NA
cg11990770	0.315702864	0.084160231	3.75121196	0.000175982	0.151	0.481	0.042087917	I	Grn	10	134721172	F	NA	NA	NA	NA	chr10:134722046-134722292	N_Shore
cg11993436	-0.56206056	0.154198746	-3.645039752	0.00026735	-0.864	-0.26	0.047748875	I	Red	7	155437098	F	NA	RBM33	NM_053043	TSS200	chr7:155436673-155437817	Island
cg12004641	0.569784463	0.146113573	3.89959982	9.64E-05	0.283	0.856	0.035664673	II	NA	2	218750749	F	NA	TNS1	NM_022648	Body	NA	NA
cg12026394	0.446441051	0.120595864	3.701959896	0.00021394	0.21	0.683	0.044588933	II	NA	9	100745975	R	NA	ANP32B	NM_006401	Body	chr9:100744982-100747768	Island
cg12027420	-0.180290397	0.049323975	-3.655228492	0.000256953	-0.277	-0.084	0.046970548	I	Red	17	46894684	F	NA	TTLL6	NM_001130918	TSS1500	chr17:46894293-46894809	Island
cg12061021	0.602982058	0.155430226	3.879438844	0.000104698	0.298	0.908	0.036545838	II	NA	1	95699574	R	NA	RWDD3;RWDD3	NM_015485;NM_001128142	TSS200;TSS200	chr1:95699725-95700142	N_Shore
cg12095720	-0.306111415	0.076582709	-3.997134859	6.41E-05	-0.456	-0.156	0.032594774	I	Red	17	72978304	F	NA	NA	NA	NA	chr17:72978235-72978632	Island
cg12100463	0.586105261	0.143822895	4.075187476	4.60E-05	0.304	0.868	0.030242045	I	Red	14	105259826	R	NA	AKT1;AKT1;AKT1;AKT1	NM_005163;NM_005163;NM_001014431;NM_001014432	5'UTR;1stExon;5'UTR;5'UTR	chr14:105261334-105261624	N_Shore
cg12108956	-0.20269346	0.048322507	-4.194597365	2.73E-05	-0.297	-0.108	0.027421067	I	Red	20	34043107	R	NA	CEP250	NM_007186	TSS200	chr20:34042854-34043585	Island
cg12126786	-0.820777444	0.202353193	-4.056162556	4.99E-05	-1.217	-0.424	0.030412231	I	Red	5	77656518	R	NA	SCAMP1	NM_004866	1stExon	chr5:77655917-77656997	Island
cg12141340	0.365106331	0.098811591	3.694974726	0.000219909	0.171	0.559	0.044936151	I	Red	1	19890415	F	NA	NA	NA	NA	NA	NA
cg12145550	-0.384614291	0.078476026	-4.901041882	9.53E-07	-0.538	-0.231	0.017801434	I	Red	20	44600942	F	NA	ZNF335	NM_022095	TSS200	chr20:44599805-44601207	Island
cg12149777	-0.219984865	0.060757388	-3.62070975	0.000293796	-0.339	-0.101	0.049092143	I	Red	4	139937459	R	NA	CCRN4L	NM_012118	Body	chr4:139936443-139937428	S_Shore
cg12159259	0.2505046	0.066226038	3.782569648	0.000155218	0.121	0.38	0.040478954	I	Red	13	113642515	R	NA	MCF2L;MCF2L	NM_001112732;NM_024979	Body;Body	NA	NA
cg12173506	-0.400562986	0.104465094	-3.834419431	0.000125861	-0.605	-0.196	0.038321768	I	Red	3	12705805	F	NA	RAF1	NM_002880	TSS200	chr3:12705059-12705887	Island
cg12176654	0.241643061	0.063193942	3.823832682	0.000131393	0.118	0.366	0.038688508	I	Grn	5	1866426	R	NA	NA	NA	NA	NA	NA
cg12183501	-0.310304966	0.083284542	-3.725841043	0.000194665	-0.474	-0.147	0.043413974	II	NA	3	148869703	R	NA	HPS3	NM_032383	Body	NA	NA
cg12223997	0.625511623	0.160592322	3.89502821	9.82E-05	0.311	0.94	0.03579364	II	NA	11	9159596	F	NA	NA	NA	NA	NA	NA
cg12263469	0.432656117	0.119575689	3.618261527	0.000296589	0.198	0.667	0.049188294	I	Red	11	69468863	R	NA	CCND1	NM_053056	3'UTR	chr11:69468810-69469152	Island
cg12275871	0.224615292	0.059684302	3.763389799	0.000167626	0.108	0.342	0.0415014	I	Red	13	114096262	R	NA	ADPRHL1;ADPRHL1	NM_199162;NM_138430	Body;Body	chr13:114096050-114096317	Island
cg12309172	0.362978975	0.094484645	3.84167157	0.000122199	0.178	0.548	0.038055942	I	Grn	15	91454691	F	rs78886622	MAN2A2	NM_006122	Body	NA	NA
cg12313341	0.195810299	0.051072469	3.8339697	0.000126092	0.096	0.296	0.038321768	II	NA	5	65771446	R	NA	NA	NA	NA	NA	NA
cg12315363	-0.450203375	0.120287937	-3.742714245	0.000182043	-0.686	-0.214	0.042553761	I	Grn	17	34136012	F	rs4251709	TAF15;TAF15	NM_139215;NM_003487	TSS1500;TSS1500	chr17:34135878-34137007	Island
cg12320322	-0.296256669	0.072588992	-4.081289176	4.48E-05	-0.439	-0.154	0.030015649	I	Red	11	63439260	R	NA	ATL3	NM_015459	TSS200	chr11:63438301-63439314	Island
cg12331332	0.551577171	0.146550188	3.763742508	0.000167389	0.264	0.839	0.041464024	II	NA	10	115439884	R	NA	CASP7;CASP7;CASP7;CASP7	NM_033340;NM_033339;NM_033338;NM_001227	5'UTR;5'UTR;5'UTR;5'UTR	chr10:115439007-115440196	Island
cg12338214	0.450412647	0.122997324	3.661971126	0.000250282	0.209	0.691	0.046590992	I	Red	10	133783113	R	NA	BNIP3	NM_004052	Body	NA	NA
cg12344247	-0.237432739	0.062916384	-3.77378235	0.000160791	-0.361	-0.114	0.040883775	I	Red	6	170615455	F	NA	FAM120B	NM_032448	TSS1500	chr6:170615241-170616210	Island
cg12364882	0.404135242	0.102157103	3.956017051	7.62E-05	0.204	0.604	0.033698302	II	NA	19	1941705	F	NA	CSNK1G2	NM_001319	5'UTR	chr19:1940303-1941940	Island
cg12381575	0.446113382	0.110112383	4.051436986	5.09E-05	0.23	0.662	0.030511754	II	NA	19	36485972	F	NA	SDHAF1	NM_001042631	TSS200	chr19:36485937-36486852	Island
cg12389545	-0.43239018	0.118092732	-3.661446158	0.000250796	-0.664	-0.201	0.046618483	I	Red	11	72353604	F	NA	PDE2A;PDE2A;PDE2A;PDE2A	NR_026572;NM_001146209;NM_002599;NM_001143839	TSS200;Body;Body;TSS200	chr11:72353222-72354358	Island
cg12401058	0.446926126	0.103442047	4.320546027	1.56E-05	0.244	0.65	0.024222597	II	NA	13	23423130	F	NA	NA	NA	NA	chr13:23422687-23422896	S_Shore
cg12408189	-0.226760114	0.06250252	-3.628015522	0.000285608	-0.349	-0.104	0.048713332	I	Grn	10	30722286	F	rs8176946	MAP3K8	NM_005204	TSS1500	chr10:30722378-30723707	N_Shore
cg12420472	0.339561959	0.08702831	3.901741395	9.55E-05	0.169	0.51	0.035640222	II	NA	1	145395607	F	rs10910809	NA	NA	NA	NA	NA
cg12424548	0.392009653	0.108494534	3.613174205	0.000302471	0.179	0.605	0.049486529	I	Red	11	2591932	F	NA	KCNQ1;KCNQ1	NM_000218;NM_181798	Body;Body	chr11:2593957-2594201	N_Shelf
cg12427444	0.343652309	0.084558286	4.064087948	4.82E-05	0.178	0.509	0.030242045	I	Red	6	31923064	R	NA	RDBP	NM_002904	Body	chr6:31926489-31926940	N_Shelf
cg12441919	0.457846649	0.116961305	3.914513867	9.06E-05	0.229	0.687	0.035165173	I	Grn	1	44483099	F	rs72544123	SLC6A9;SLC6A9;SLC6A9	NM_001024845;NM_201649;NM_006934	Body;TSS200;TSS200	NA	NA
cg12454419	-0.490115395	0.125120093	-3.917159775	8.96E-05	-0.735	-0.245	0.035165173	I	Grn	4	77135195	F	NA	SCARB2	NM_005506	TSS200	chr4:77134566-77135377	Island
cg12457035	-0.389853264	0.10226421	-3.812216073	0.000137726	-0.59	-0.189	0.038960227	I	Red	5	180688144	F	NA	TRIM52	NM_032765	TSS200	chr5:180688051-180688962	Island
cg12471171	0.34537915	0.076409235	4.520123146	6.18E-06	0.196	0.495	0.020026345	I	Grn	11	75898203	F	NA	WNT11	NM_004626	Body	NA	NA
cg12479630	-0.351676584	0.086026449	-4.088005359	4.35E-05	-0.52	-0.183	0.029794831	I	Red	1	28157569	R	NA	PPP1R8;PPP1R8;PPP1R8;PPP1R8;PPP1R8	NM_138558;NM_014110;NM_002713;NM_002713;NM_138558	5'UTR;Body;1stExon;5'UTR;1stExon	chr1:28157221-28157788	Island
cg12508534	-0.212150322	0.056508373	-3.754316579	0.000173815	-0.323	-0.101	0.041926963	I	Red	6	34855789	F	NA	TAF11;TAF11;ANKS1A	NM_005643;NM_005643;NM_015245	1stExon;5'UTR;TSS1500	chr6:34855604-34855888	Island
cg12513589	-0.631454979	0.1637249	-3.85680479	0.000114879	-0.952	-0.311	0.037485912	I	Grn	4	76911810	F	NA	SDAD1	NM_018115	Body	chr4:76911843-76912252	N_Shore
cg12520327	0.31699982	0.071623659	4.425909326	9.60E-06	0.177	0.457	0.021276	II	NA	17	47645368	F	rs721878	NA	NA	NA	chr17:47645365-47645833	Island
cg12520963	-0.358539737	0.091417583	-3.921999736	8.78E-05	-0.538	-0.179	0.034883186	I	Red	20	37359636	R	NA	NA	NA	NA	chr20:37359505-37359853	Island
cg12528016	-0.188194279	0.044002935	-4.276857455	1.90E-05	-0.274	-0.102	0.024380182	I	Red	1	27998711	R	NA	IFI6;IFI6;IFI6;IFI6;IFI6;IFI6	NM_022873;NM_022873;NM_002038;NM_002038;NM_022872;NM_022872	1stExon;5'UTR;5'UTR;1stExon;1stExon;5'UTR	chr1:27994727-27995031	S_Shelf
cg12536809	0.550135347	0.140242987	3.922729815	8.76E-05	0.275	0.825	0.034883186	I	Red	17	72852514	R	NA	GRIN2C	NM_000835	5'UTR	chr17:72855621-72858012	N_Shelf
cg12593431	0.605548094	0.1555622	3.892642893	9.92E-05	0.301	0.91	0.035914659	I	Red	13	112240754	F	NA	NA	NA	NA	chr13:112238672-112238893	S_Shore
cg12600109	0.383792486	0.097891389	3.920594935	8.83E-05	0.192	0.576	0.034898758	I	Red	20	62321166	R	NA	RTEL1;RTEL1	NM_016434;NM_032957	Body;Body	chr20:62321053-62321259	Island
cg12602945	0.53690824	0.141126991	3.804433424	0.000142129	0.26	0.814	0.039368142	II	NA	19	49541529	R	NA	CGB1	NM_033377	TSS1500	NA	NA
cg12612340	-0.258278219	0.06240379	-4.138822631	3.49E-05	-0.381	-0.136	0.029201666	I	Red	11	47664330	R	NA	MTCH2	NM_014342	TSS200	chr11:47663577-47664331	Island
cg12623107	-0.237316373	0.063694469	-3.725855289	0.000194654	-0.362	-0.112	0.043413974	II	NA	11	18346401	R	NA	GTF2H1;GTF2H1	NM_001142307;NM_005316	5'UTR;5'UTR	chr11:18343625-18344238	S_Shelf
cg12624721	0.357936093	0.095551529	3.746000696	0.000179676	0.171	0.545	0.042326491	I	Red	8	143511575	R	NA	NA	NA	NA	chr8:143509372-143509630	S_Shore
cg12643458	0.413306522	0.108377044	3.813598392	0.000136958	0.201	0.626	0.038960227	I	Red	11	78497991	R	NA	ODZ4	NM_001098816	Body	NA	NA
cg12648193	0.216743356	0.059278311	3.656368605	0.000255813	0.101	0.333	0.046868111	II	NA	1	246669975	F	rs79800732	SMYD3	NM_001167740	Body	chr1:246670148-246670768	N_Shore
cg12665504	0.646233917	0.17314867	3.732248801	0.000189778	0.307	0.986	0.04305582	II	NA	5	100239050	R	NA	ST8SIA4;ST8SIA4	NM_005668;NM_175052	TSS200;TSS200	chr5:100238722-100239138	Island
cg12670347	-0.489886846	0.123145434	-3.978116195	6.95E-05	-0.731	-0.249	0.032873036	I	Red	12	114847578	R	NA	TBX5;TBX5	NM_080717;NM_000192	TSS1500;TSS1500	chr12:114845861-114847650	Island
cg12679192	0.669641592	0.153209849	4.370747688	1.24E-05	0.369	0.97	0.02323787	I	Red	8	68969455	R	NA	PREX2;PREX2	NM_025170;NM_024870	Body;Body	NA	NA
cg12701571	-0.245425324	0.063778294	-3.848101099	0.000119037	-0.37	-0.12	0.037897612	I	Red	2	239335411	F	rs13020074	ASB1	NM_001040445	TSS1500	chr2:239335160-239336263	Island
cg12704854	-0.530307194	0.137606304	-3.853800138	0.000116299	-0.8	-0.261	0.037634396	I	Red	6	30042919	F	rs1150736	RNF39;RNF39	NM_170769;NM_025236	Body;Body	chr6:30042918-30043500	Island
cg12712659	0.878255599	0.192998142	4.550590948	5.35E-06	0.5	1.257	0.019824328	II	NA	7	61818348	R	NA	NA	NA	NA	chr7:61820458-61822022	N_Shelf
cg12717668	0.707869255	0.183356728	3.860612385	0.000113103	0.348	1.067	0.03735502	II	NA	7	99156195	F	rs73713513	ZNF655;ZNF655;ZNF655;ZNF655;ZNF655;ZNF655;ZNF655;ZNF655;ZNF655;ZNF655;ZNF655;ZNF655	NM_001009960;NM_138494;NM_001009958;NM_138494;NM_001083956;NM_001085366;NM_024061;NM_001085368;NM_001083956;NM_001085367;NM_001085366;NM_024061	TSS1500;1stExon;TSS1500;5'UTR;5'UTR;1stExon;1stExon;TSS1500;1stExon;TSS1500;5'UTR;5'UTR	chr7:99155871-99156969	Island
cg12724894	-0.384494203	0.105667385	-3.638721672	0.000273995	-0.592	-0.177	0.047989801	II	NA	10	716157	R	NA	DIP2C	NM_014974	Body	chr10:711896-712395	S_Shelf
cg12738349	-0.256736002	0.064865485	-3.957975496	7.56E-05	-0.384	-0.13	0.033698302	I	Red	22	24236284	F	NA	MIF	NM_002415	TSS1500	chr22:24236257-24237539	Island
cg12763668	0.583254072	0.149826271	3.892869171	9.91E-05	0.29	0.877	0.035914659	I	Red	1	19687257	F	NA	CAPZB	NM_004930	Body	NA	NA
cg12768770	0.450260373	0.117978123	3.816473444	0.000135373	0.219	0.681	0.038960227	II	NA	1	45240981	F	NA	SNORD55;SNORD46;RPS8	NR_000015;NR_000024;NM_001012	TSS1500;TSS1500;TSS1500	chr1:45241013-45241900	N_Shore
cg12797746	0.647822424	0.146829299	4.41207872	1.02E-05	0.36	0.936	0.021664877	I	Red	8	1110520	F	NA	NA	NA	NA	chr8:1113058-1114073	N_Shelf
cg12822286	0.292928878	0.061468148	4.765539363	1.88E-06	0.172	0.413	0.0186624	II	NA	3	101394951	F	NA	LOC100009676;ZBTB11	NR_024407;NM_014415	TSS1500;Body	chr3:101394976-101396096	N_Shore
cg12837524	0.316714956	0.083234351	3.805099128	0.000141747	0.154	0.48	0.039368142	I	Grn	8	10339477	R	NA	NA	NA	NA	NA	NA
cg12845895	0.18593799	0.049364716	3.766617195	0.000165474	0.089	0.283	0.04130582	I	Grn	18	77676008	R	NA	PQLC1;PQLC1;PQLC1	NM_001146345;NM_001146343;NM_025078	Body;Body;Body	chr18:77675990-77676322	Island
cg12847429	0.363254879	0.091113483	3.98683999	6.70E-05	0.185	0.542	0.032771644	II	NA	14	54948899	R	NA	GMFB	NM_004124	Body	NA	NA
cg12863717	-0.235829814	0.055782905	-4.227635938	2.36E-05	-0.345	-0.126	0.025998984	I	Red	13	50367064	F	NA	KPNA3	NM_002267	TSS200	chr13:50366060-50367303	Island
cg12863967	0.117655269	0.030879688	3.810118496	0.0001389	0.057	0.178	0.039050918	II	NA	7	93534920	F	NA	GNGT1	NM_021955	TSS1500	NA	NA
cg12881557	-0.659480768	0.148472198	-4.44177953	8.92E-06	-0.95	-0.368	0.020877178	I	Grn	18	24130633	F	NA	KCTD1;KCTD1	NM_198991;NM_001136205	5'UTR;TSS1500	chr18:24126780-24131138	Island
cg12884141	0.429455499	0.099466304	4.317597853	1.58E-05	0.235	0.624	0.024222597	I	Red	11	68191091	R	NA	LRP5	NM_002335	Body	chr11:68191009-68191229	Island
cg12893361	-0.296645157	0.07142766	-4.153085189	3.28E-05	-0.437	-0.157	0.028922362	I	Red	12	122124854	F	NA	NA	NA	NA	chr12:122124839-122125216	Island
cg12903648	0.089621125	0.022082696	4.058432208	4.94E-05	0.046	0.133	0.030285203	II	NA	1	157522570	F	NA	FCRL5	NM_031281	TSS1500	NA	NA
cg12903924	-0.246414503	0.053777569	-4.582105633	4.60E-06	-0.352	-0.141	0.019595269	I	Red	2	242448061	F	NA	STK25	NM_006374	TSS200	chr2:242447017-242448558	Island
cg12909741	-0.32950328	0.080122103	-4.112514107	3.91E-05	-0.487	-0.172	0.029421726	I	Red	20	10199469	F	NA	SNAP25;SNAP25	NM_130811;NM_003081	TSS200;TSS200	chr20:10200088-10200384	N_Shore
cg12913587	0.406602435	0.110841648	3.668318205	0.000244151	0.189	0.624	0.046481088	I	Red	5	1232923	R	NA	SLC6A18	NM_182632	Body	chr5:1232352-1232594	S_Shore
cg12914511	0.16055701	0.043923208	3.655402588	0.000256779	0.074	0.247	0.046956361	I	Red	7	157447781	R	NA	PTPRN2;PTPRN2;PTPRN2	NM_002847;NM_130842;NM_130843	Body;Body;Body	chr7:157448240-157448566	N_Shore
cg12942139	0.429246592	0.116149854	3.695627475	0.000219344	0.202	0.657	0.044936151	I	Grn	22	37823517	R	NA	ELFN2	NM_052906	TSS200	chr22:37823011-37824119	Island
cg12948059	0.336396977	0.084320237	3.989516489	6.62E-05	0.171	0.502	0.032754148	II	NA	2	129659420	F	NA	NA	NA	NA	chr2:129659299-129659568	Island
cg12953669	0.297908879	0.06799392	4.38140465	1.18E-05	0.165	0.431	0.022914927	II	NA	18	60988017	R	NA	BCL2;BCL2	NM_000633;NM_000657	TSS1500;TSS1500	chr18:60986621-60988286	Island
cg12954385	0.372999375	0.103015418	3.620811163	0.000293681	0.171	0.575	0.049092143	I	Red	21	46686990	F	NA	POFUT2;POFUT2;POFUT2	NM_015227;NR_004858;NM_133635	3'UTR;Body;Body	chr21:46686907-46687121	Island
cg12957407	0.383528197	0.106357233	3.606037736	0.000310908	0.175	0.592	0.049993209	I	Grn	19	17945763	R	NA	JAK3	NM_000215	Body	chr19:17942061-17942567	S_Shelf
cg12958836	0.432979874	0.116373069	3.720619201	0.000198735	0.205	0.661	0.043502337	II	NA	12	8185024	R	NA	FOXJ2	NM_018416	TSS1500	chr12:8184964-8185616	Island
cg12967666	0.795116625	0.190753627	4.168290988	3.07E-05	0.421	1.169	0.028319524	II	NA	14	53745145	F	NA	NA	NA	NA	NA	NA
cg12985235	0.38694268	0.103179152	3.75020218	0.000176692	0.185	0.589	0.042093283	I	Red	19	4345965	F	NA	MPND;MPND	NM_001159846;NM_032868	Body;Body	chr19:4343266-4344027	S_Shore
cg12989851	-0.331338486	0.091519705	-3.620405982	0.000294141	-0.511	-0.152	0.049092143	I	Red	3	147074517	R	NA	NA	NA	NA	chr3:147077115-147077672	N_Shelf
cg12991830	-0.491932667	0.132377759	-3.716127779	0.000202299	-0.751	-0.232	0.043886836	I	Red	6	100038960	R	NA	NA	NA	NA	chr6:100038655-100039477	Island
cg12993740	0.419242273	0.110662993	3.788459541	0.000151584	0.202	0.636	0.040279156	II	NA	5	65476531	F	rs77120402	SFRS12;SFRS12	NM_001077199;NM_139168	3'UTR;3'UTR	NA	NA
cg12993807	0.241929638	0.064265634	3.764525837	0.000166865	0.116	0.368	0.041454224	I	Red	5	1075045	R	NA	SLC12A7	NM_006598	Body	chr5:1073560-1074023	S_Shore
cg12994003	0.373441064	0.102110597	3.657221434	0.000254964	0.173	0.574	0.04678312	II	NA	1	225616475	F	NA	LBR;LBR;LBR	NM_194442;NM_002296;NM_194442	1stExon;TSS1500;5'UTR	chr1:225614721-225616512	Island
cg13012899	0.414691567	0.105491318	3.93104924	8.46E-05	0.208	0.621	0.034798845	I	Red	14	105685616	R	NA	BRF1;BRF1	NM_001519;NM_145685	Body;Body	chr14:105685452-105685733	Island
cg13013841	0.517790015	0.139555981	3.710267471	0.00020704	0.244	0.791	0.044165261	II	NA	17	18281021	R	NA	EVPLL	NM_001145127	TSS200	NA	NA
cg13027404	-0.282939718	0.073314588	-3.859255362	0.000113733	-0.427	-0.139	0.037388447	I	Red	15	53095984	F	NA	NA	NA	NA	chr15:53096014-53096482	N_Shore
cg13049357	0.413240755	0.099119758	4.169105785	3.06E-05	0.219	0.608	0.028319524	I	Grn	7	44367340	R	NA	NA	NA	NA	chr7:44364432-44365328	S_Shelf
cg13049398	0.317619169	0.083040753	3.824858973	0.000130847	0.155	0.48	0.038669756	II	NA	18	74157682	F	rs586769	ZNF516	NM_014643	5'UTR	chr18:74153239-74155073	S_Shelf
cg13062406	-0.201673223	0.054985063	-3.667781985	0.000244664	-0.309	-0.094	0.046481088	I	Red	11	18813544	F	NA	PTPN5;PTPN5;PTPN5	NM_006906;NM_001039970;NM_032781	TSS200;TSS200;TSS200	chr11:18812572-18814079	Island
cg13074634	0.351437015	0.090664105	3.876253058	0.000106077	0.174	0.529	0.036634949	I	Red	12	132835199	R	NA	GALNT9	NM_001122636	Body	chr12:132834178-132834430	S_Shore
cg13084525	0.556941649	0.145572262	3.825877557	0.000130307	0.272	0.842	0.038626384	II	NA	11	34642463	F	rs286926	EHF	NM_012153	TSS1500	NA	NA
cg13094338	0.447720759	0.117648414	3.805582609	0.000141471	0.217	0.678	0.039368142	II	NA	20	62258937	F	NA	GMEB2	NM_012384	TSS1500	chr20:62257589-62259476	Island
cg13150632	-0.390195897	0.104180065	-3.745398864	0.000180107	-0.594	-0.186	0.042386961	I	Red	6	31549222	R	NA	LTB;LTB	NM_002341;NM_009588	Body;3'UTR	chr6:31548436-31549277	Island
cg13161852	0.369504879	0.094645112	3.904109475	9.46E-05	0.184	0.555	0.035550511	I	Red	15	78191179	F	NA	NA	NA	NA	NA	NA
cg13167862	0.571308329	0.157407342	3.629489702	0.000283982	0.263	0.88	0.048713332	II	NA	2	129225407	R	NA	NA	NA	NA	chr2:129228601-129228807	N_Shelf
cg13168437	-0.338051705	0.090788404	-3.723511938	0.000196471	-0.516	-0.16	0.043450484	I	Red	1	93250863	F	rs4847363	EVI5	NM_005665	Body	chr1:93249938-93251096	Island
cg13171979	0.840728148	0.207311469	4.055386563	5.01E-05	0.434	1.247	0.030412231	II	NA	16	57497010	R	NA	POLR2C	NM_032940	Body	chr16:57496476-57497038	Island
cg13187433	0.296810087	0.077617502	3.824009787	0.000131299	0.145	0.449	0.038688508	I	Red	1	9416179	R	NA	SPSB1	NM_025106	Body	chr1:9416126-9416404	Island
cg13191911	0.716855493	0.168152986	4.263114851	2.02E-05	0.387	1.046	0.024642275	II	NA	10	44806660	F	rs800332	NA	NA	NA	chr10:44806145-44806729	Island
cg13197560	0.346046326	0.086450963	4.00280474	6.26E-05	0.177	0.515	0.032399883	I	Red	13	113649953	R	NA	MCF2L;MCF2L	NM_001112732;NM_024979	Body;Body	chr13:113648343-113649601	S_Shore
cg13224077	-0.259970434	0.069009479	-3.767169918	0.000165109	-0.395	-0.125	0.041297938	I	Red	6	32936079	F	rs72865867	BRD2	NM_005104	TSS1500	chr6:32935896-32936792	Island
cg13231501	0.256977154	0.064440088	3.987846085	6.67E-05	0.131	0.383	0.032754148	II	NA	2	97653560	R	NA	FAM178B	NM_001122646	TSS1500	chr2:97651764-97652441	S_Shore
cg13247673	0.289634989	0.078838818	3.673761195	0.000239006	0.135	0.444	0.045993	I	Red	11	1983240	R	NA	NA	NA	NA	chr11:1983124-1983351	Island
cg13248847	-0.574548591	0.151886678	-3.782745135	0.000155108	-0.872	-0.277	0.040478954	I	Red	17	7137857	F	NA	DVL2;DVL2	NM_004422;NM_004422	5'UTR;1stExon	chr17:7137358-7138133	Island
cg13251269	-0.244634517	0.063393637	-3.85897591	0.000113863	-0.369	-0.12	0.037403201	I	Red	7	112726538	R	NA	GPR85;GPR85;GPR85;GPR85;GPR85	NM_018970;NM_001146266;NM_001146267;NM_001146267;NM_001146265	5'UTR;TSS200;1stExon;5'UTR;5'UTR	NA	NA
cg13258989	-0.182750804	0.047820581	-3.821593136	0.000132592	-0.276	-0.089	0.038710152	I	Grn	17	72969043	F	NA	C17orf28	NM_030630	TSS200	chr17:72968167-72969164	Island
cg13259063	1.060382543	0.264137873	4.014503989	5.96E-05	0.543	1.578	0.03206475	II	NA	10	134363419	R	NA	INPP5A	NM_005539	Body	chr10:134359533-134359780	S_Shelf
cg13266018	0.499949106	0.120898504	4.135279495	3.55E-05	0.263	0.737	0.029370632	I	Red	7	5637739	F	NA	FSCN1	NM_003088	Body	chr7:5632335-5634555	S_Shelf
cg13266242	0.457184546	0.118478653	3.858792579	0.000113949	0.225	0.689	0.037403743	II	NA	6	29834495	F	NA	NA	NA	NA	chr6:29831849-29832086	S_Shelf
cg13323416	0.366582478	0.101181002	3.623036639	0.000291165	0.168	0.565	0.049016605	I	Grn	6	45609367	F	NA	NA	NA	NA	NA	NA
cg13323701	-0.225782569	0.060989499	-3.701990884	0.000213914	-0.345	-0.106	0.044588933	I	Red	6	118228508	F	rs2788996	SLC35F1	NM_001029858	TSS200	chr6:118228042-118229811	Island
cg13334819	-0.326772984	0.084218091	-3.88008062	0.000104422	-0.492	-0.162	0.036545253	I	Grn	7	99746414	F	rs58185311	C7orf59	NM_001008395	TSS200	chr7:99746253-99746643	Island
cg13345353	0.37716496	0.100093604	3.768122494	0.00016448	0.181	0.573	0.041274702	I	Red	2	242715022	F	NA	GAL3ST2	NM_022134	TSS1500	chr2:242710637-242711047	S_Shelf
cg13353311	0.25850352	0.071030512	3.63933064	0.000273348	0.119	0.398	0.047959033	I	Grn	5	59996240	F	NA	DEPDC1B;DEPDC1B	NM_018369;NM_001145208	TSS1500;TSS1500	chr5:59995374-59996331	Island
cg13357518	-0.260524139	0.066810663	-3.899439536	9.64E-05	-0.391	-0.13	0.035664673	I	Red	1	22263347	F	NA	HSPG2	NM_005529	Body	NA	NA
cg13361920	0.929800036	0.247721239	3.753412663	0.000174443	0.444	1.415	0.041990247	II	NA	10	94333759	R	NA	IDE	NM_004969	1stExon	chr10:94333247-94334467	Island
cg13366654	0.369323019	0.090216398	4.093745995	4.24E-05	0.193	0.546	0.029566726	I	Red	5	1486893	R	NA	LPCAT1	NM_024830	Body	chr5:1489799-1490071	N_Shelf
cg13369981	-0.543181625	0.143750347	-3.778645664	0.000157684	-0.825	-0.261	0.040675208	I	Grn	7	100027501	R	NA	MEPCE;ZCWPW1	NM_019606;NM_017984	TSS200;TSS1500	chr7:100025804-100028002	Island
cg13372862	0.267154667	0.070440932	3.79260549	0.000149075	0.129	0.405	0.040142899	I	Red	8	145235328	R	NA	HEATR7A;HEATR7A;HEATR7A	NM_001099281;NM_001099280;NM_032450	Body;Body;Body	chr8:145235202-145235442	Island
cg13378388	0.469648515	0.128283752	3.661013238	0.00025122	0.218	0.721	0.046649341	II	NA	4	177713813	F	NA	VEGFC;VEGFC	NM_005429;NM_005429	5'UTR;1stExon	chr4:177713243-177714457	Island
cg13383332	-0.513338822	0.133922501	-3.833103612	0.000126537	-0.776	-0.251	0.03834897	I	Red	8	141644455	R	NA	EIF2C2;EIF2C2	NM_012154;NM_001164623	Body;Body	chr8:141644429-141645598	Island
cg13401014	0.254697041	0.066810291	3.812242663	0.000137712	0.124	0.386	0.038960227	I	Red	11	128559244	R	NA	NA	NA	NA	chr11:128560103-128560537	N_Shore
cg13402217	-0.243345699	0.066205323	-3.675621348	0.000237271	-0.373	-0.114	0.045912367	I	Red	1	151584375	F	NA	SNX27	NM_030918	TSS1500	chr1:151584374-151585205	Island
cg13405485	-0.312250242	0.068346964	-4.56860443	4.91E-06	-0.446	-0.178	0.019595269	I	Red	10	13628859	F	NA	PRPF18	NM_003675	TSS200	chr10:13628789-13629266	Island
cg13406860	0.263427524	0.068979302	3.818935798	0.000134029	0.128	0.399	0.038872468	I	Red	9	132881336	F	NA	GPR107;GPR107;GPR107	NM_020960;NM_001136557;NM_001136558	Body;Body;Body	NA	NA
cg13411897	-0.326328232	0.077056608	-4.234915628	2.29E-05	-0.477	-0.175	0.025746424	I	Red	3	12526166	R	NA	TSEN2;TSEN2;TSEN2;TSEN2;TSEN2;TSEN2;TSEN2	NM_001145395;NM_001145392;NM_001145395;NM_025265;NM_001145393;NM_025265;NM_001145394	5'UTR;5'UTR;1stExon;5'UTR;5'UTR;1stExon;5'UTR	chr3:12525749-12526346	Island
cg13411962	-0.391603723	0.094154955	-4.159140869	3.19E-05	-0.576	-0.207	0.028668259	I	Grn	8	28243934	F	NA	ZNF395;ZNF395	NM_018660;NM_018660	5'UTR;1stExon	chr8:28243684-28244283	Island
cg13413789	0.415730377	0.109039747	3.812649859	0.000137485	0.202	0.629	0.038960227	II	NA	6	30524755	R	NA	PRR3;PRR3;PRR3;GNL1;PRR3;GNL1	NM_025263;NM_001077497;NM_025263;NM_005275;NM_001077497;NM_005275	5'UTR;5'UTR;1stExon;5'UTR;1stExon;1stExon	chr6:30523775-30525189	Island
cg13416129	0.556650141	0.135426988	4.110333918	3.95E-05	0.291	0.822	0.029421726	II	NA	9	140037808	F	NA	GRIN1;GRIN1;GRIN1	NM_000832;NM_007327;NM_021569	Body;Body;Body	chr9:140040091-140040698	N_Shelf
cg13416309	0.077333973	0.020186977	3.830884285	0.000127684	0.038	0.117	0.038528213	II	NA	9	115705252	F	NA	NA	NA	NA	chr9:115708028-115708238	N_Shelf
cg13425140	0.29314563	0.078559553	3.731508364	0.000190337	0.139	0.447	0.043105275	I	Red	9	139145927	R	NA	NA	NA	NA	chr9:139143508-139144429	S_Shore
cg13426133	0.522699452	0.137023863	3.814660017	0.000136371	0.254	0.791	0.038960227	II	NA	13	41768078	F	NA	KBTBD7	NM_032138	1stExon	chr13:41767827-41768762	Island
cg13436940	-0.478781439	0.130919175	-3.657076517	0.000255108	-0.735	-0.222	0.046791883	I	Red	11	116064295	R	NA	NA	NA	NA	NA	NA
cg13439505	0.226027461	0.059586375	3.793274216	0.000148674	0.109	0.343	0.040085681	I	Grn	8	144341571	R	NA	ZFP41	NM_173832	3'UTR	chr8:144337536-144338585	S_Shelf
cg13454570	0.244320145	0.061193051	3.99261255	6.53E-05	0.124	0.364	0.032748156	I	Red	11	133805594	F	NA	IGSF9B	NM_014987	Body	NA	NA
cg13457427	0.497651532	0.116299893	4.279036901	1.88E-05	0.27	0.726	0.024380182	I	Red	10	134955698	F	rs9419016	NA	NA	NA	chr10:134955508-134955800	Island
cg13457890	-0.408176522	0.110301548	-3.700551171	0.000215132	-0.624	-0.192	0.044708499	I	Red	11	804976	R	NA	LRDD;LRDD;LRDD	NM_018494;NM_145887;NM_145886	5'UTR;TSS1500;5'UTR	chr11:804827-805608	Island
cg13458255	0.403453029	0.090822541	4.442212533	8.90E-06	0.225	0.581	0.020877178	I	Red	8	58191386	F	NA	C8orf71	NR_026772	TSS1500	chr8:58192499-58192884	N_Shore
cg13463203	0.286709015	0.069629011	4.11766606	3.83E-05	0.15	0.423	0.029421726	I	Red	9	132961972	R	NA	FREQ;FREQ	NM_001128826;NM_014286	TSS1500;Body	NA	NA
cg13466974	-0.29093194	0.0778687	-3.736185914	0.000186833	-0.444	-0.138	0.042787476	I	Red	17	7761357	R	NA	CYB5D1;CYB5D1;LSMD1	NM_144607;NM_144607;NM_032356	1stExon;5'UTR;TSS200	chr17:7760281-7761680	Island
cg13469286	0.185346454	0.039853632	4.650679173	3.31E-06	0.107	0.263	0.019595269	I	Red	10	134680756	F	NA	NA	NA	NA	chr10:134682700-134682917	N_Shore
cg13513411	0.147237441	0.040102366	3.671540031	0.000241093	0.069	0.226	0.046248002	I	Red	19	4676202	R	NA	DPP9	NM_139159	3'UTR	chr19:4676416-4676718	N_Shore
cg13527203	0.402914664	0.102312553	3.93807653	8.21E-05	0.202	0.603	0.034580741	I	Red	8	145048278	F	NA	PLEC1;PLEC1	NM_000445;NM_201378	Body;TSS1500	chr8:145047293-145052305	Island
cg13547132	0.30499949	0.08233108	3.704548635	0.000211767	0.144	0.466	0.044547509	I	Red	1	2835258	F	NA	NA	NA	NA	NA	NA
cg13548781	1.296059629	0.281984053	4.596216053	4.30E-06	0.743	1.849	0.019595269	II	NA	10	104474172	R	NA	SFXN2;ARL3;ARL3	NM_178858;NM_004311;NM_004311	TSS200;1stExon;5'UTR	chr10:104473399-104474711	Island
cg13551706	0.562577669	0.144335802	3.897700093	9.71E-05	0.28	0.845	0.035708486	I	Red	20	46323481	R	rs6063137	SULF2;SULF2;SULF2	NM_198596;NM_001161841;NM_018837	Body;Body;Body	NA	NA
cg13570090	0.339966595	0.092084055	3.691915998	0.000222571	0.159	0.52	0.045061793	I	Red	19	11319771	R	NA	DOCK6	NM_020812	Body	chr19:11319444-11319753	S_Shore
cg13573611	-0.274544724	0.069712562	-3.938238902	8.21E-05	-0.411	-0.138	0.034580741	II	NA	9	140336654	F	NA	ENTPD8;ENTPD8	NM_198585;NM_001033113	TSS1500;TSS1500	chr9:140335758-140336321	S_Shore
cg13579562	-0.265890664	0.068897197	-3.859237756	0.000113741	-0.401	-0.131	0.037388447	I	Red	15	41221543	R	NA	DLL4	NM_019074	TSS200	chr15:41217789-41223180	Island
cg13590180	0.415286108	0.112129989	3.703613205	0.00021255	0.196	0.635	0.044588933	I	Red	11	1986191	F	rs11042048	NA	NA	NA	chr11:1986015-1986362	Island
cg13590711	0.711333749	0.194181554	3.663240588	0.000249044	0.331	1.092	0.046590992	I	Red	14	30440498	F	rs78820787	NA	NA	NA	NA	NA
cg13591648	0.511530637	0.135087826	3.786652387	0.00015269	0.247	0.776	0.040377481	I	Red	21	44821451	R	NA	NA	NA	NA	chr21:44818894-44819446	S_Shelf
cg13602484	0.366315907	0.099855827	3.668447971	0.000244027	0.171	0.562	0.046481088	I	Grn	19	46177353	F	NA	MIR642;GIPR	NR_030372;NM_000164	TSS1500;Body	chr19:46180162-46180769	N_Shelf
cg13604623	0.139330725	0.034493054	4.039385014	5.36E-05	0.072	0.207	0.031107885	II	NA	11	113745722	R	NA	USP28	NM_020886	Body	chr11:113745816-113746693	N_Shore
cg13614229	0.297820015	0.064496861	4.617589269	3.88E-06	0.171	0.424	0.019595269	I	Red	12	131217218	R	NA	NA	NA	NA	NA	NA
cg13627451	-0.276352705	0.074701869	-3.699408194	0.000216103	-0.423	-0.13	0.044762902	I	Red	15	52043674	R	NA	TMOD2;TMOD2;LYSMD2	NM_001142885;NM_014548;NM_001143917	TSS200;TSS200;TSS200	chr15:52043422-52044447	Island
cg13632230	-0.419610358	0.114151661	-3.675902341	0.00023701	-0.643	-0.196	0.045912367	I	Red	9	108418691	R	NA	NA	NA	NA	chr9:108418403-108418934	Island
cg13656025	-0.691484421	0.191226096	-3.616056772	0.000299125	-1.066	-0.317	0.049380714	I	Red	17	7744978	F	NA	KDM6B	NM_001080424	5'UTR	chr17:7745066-7748420	N_Shore
cg13659951	-0.269429868	0.059891793	-4.498610829	6.84E-06	-0.387	-0.152	0.020594892	I	Red	9	5628674	F	NA	KIAA1432	NM_001135920	TSS1500	chr9:5628570-5629743	Island
cg13662628	0.233497242	0.052661488	4.43392789	9.25E-06	0.13	0.337	0.021086552	I	Red	9	127572244	F	NA	OLFML2A	NM_182487	Body	chr9:127572126-127572641	Island
cg13677369	-0.321759444	0.086700929	-3.711141843	0.000206326	-0.492	-0.152	0.044165261	I	Red	22	29702845	R	NA	GAS2L1;GAS2L1;GAS2L1	NM_006478;NM_152236;NM_152237	TSS200;TSS200;TSS200	chr22:29702245-29704723	Island
cg13678112	-0.297997796	0.063405542	-4.699869877	2.60E-06	-0.422	-0.174	0.019595269	I	Red	14	89029552	R	NA	ZC3H14;ZC3H14;ZC3H14;ZC3H14;ZC3H14	NM_207661;NM_001160104;NM_001160103;NM_207660;NM_024824	TSS200;Body;Body;Body;Body	chr14:89029178-89029938	Island
cg13704678	-0.264144566	0.065078061	-4.05888808	4.93E-05	-0.392	-0.137	0.030285203	I	Red	3	10362667	F	NA	SEC13;SEC13;SEC13;SEC13;SEC13	NM_001136232;NR_024273;NM_183352;NR_024272;NM_001136232	1stExon;Body;Body;Body;5'UTR	chr3:10362506-10362941	Island
cg13726563	0.504369663	0.132518422	3.806034337	0.000141213	0.245	0.764	0.039368142	I	Red	13	112599593	R	NA	NA	NA	NA	NA	NA
cg13754948	0.379564173	0.103148584	3.679780731	0.000233435	0.177	0.582	0.045698104	I	Red	7	155679340	R	NA	NA	NA	NA	NA	NA
cg13763729	-0.223035164	0.0601083	-3.710555161	0.000206805	-0.341	-0.105	0.044165261	I	Red	18	5294883	R	NA	ZFP161;ZFP161;ZFP161	NR_026569;NM_001143823;NM_003409	Body;5'UTR;5'UTR	chr18:5294737-5294941	Island
cg13765004	0.619541987	0.165697282	3.738999097	0.000184754	0.295	0.944	0.042622298	II	NA	19	46459462	R	NA	NOVA2	NM_002516	Body	chr19:46456209-46456503	S_Shelf
cg13769605	0.406317448	0.107406978	3.782970688	0.000154968	0.196	0.617	0.040478954	II	NA	2	12857067	R	NA	TRIB2;TRIB2;TRIB2	NM_021643;NM_021643;NR_027303	1stExon;5'UTR;Body	chr2:12856625-12859019	Island
cg13776340	-0.287205059	0.074224793	-3.869395221	0.000109106	-0.433	-0.142	0.036837348	I	Grn	6	80656888	F	NA	ELOVL4	NM_022726	Body	chr6:80656744-80657593	Island
cg13779777	0.380407547	0.092756808	4.101128058	4.11E-05	0.199	0.562	0.029421726	II	NA	17	79435897	R	NA	NA	NA	NA	NA	NA
cg13784482	0.134162115	0.037131993	3.613113735	0.000302542	0.061	0.207	0.049486529	II	NA	21	47881507	F	NA	DIP2A;DIP2A;DIP2A;DIP2A;DIP2A;DIP2A;DIP2A	NM_001146114;NM_206889;NM_015151;NM_001146116;NM_001146115;NM_206891;NM_206890	Body;Body;Body;Body;Body;Body;Body	chr21:47878070-47879576	S_Shore
cg13786666	-0.429748007	0.110394254	-3.892847607	9.91E-05	-0.646	-0.213	0.035914659	I	Grn	9	86536028	F	NA	KIF27	NM_017576	5'UTR	chr9:86535742-86536646	Island
cg13798746	0.960198774	0.221320212	4.338504668	1.43E-05	0.526	1.394	0.024222597	II	NA	6	32038887	F	NA	TNXB	NM_019105	Body	NA	NA
cg13805533	0.619552626	0.140229198	4.418142847	9.96E-06	0.345	0.894	0.0214337	I	Grn	20	19674482	R	NA	SLC24A3	NM_020689	Body	NA	NA
cg13812613	-0.330852307	0.084659271	-3.908045782	9.30E-05	-0.497	-0.165	0.0355295	I	Red	17	76836799	F	NA	USP36	NM_025090	5'UTR	chr17:76836060-76837438	Island
cg13826470	0.430516518	0.111184317	3.872097518	0.000107903	0.213	0.648	0.036737788	II	NA	6	33290842	F	rs3106194	DAXX;DAXX;DAXX;DAXX	NM_001141969;NM_001350;NR_024517;NM_001141970	TSS200;TSS200;TSS200;TSS200	chr6:33290370-33291087	Island
cg13853046	0.427090411	0.117658783	3.629906759	0.000283524	0.196	0.658	0.048713332	I	Grn	17	56603735	R	NA	SEPT4;SEPT4;SEPT4	NM_080415;NM_080416;NM_004574	Body;Body;Body	NA	NA
cg13854962	0.459821232	0.112888051	4.073249801	4.64E-05	0.239	0.681	0.030242045	I	Grn	9	137712776	R	NA	COL5A1	NM_000093	Body	chr9:137709962-137710291	S_Shelf
cg13858407	0.704051259	0.162286547	4.338321774	1.44E-05	0.386	1.022	0.024222597	I	Grn	2	235935606	F	NA	SH3BP4	NM_014521	5'UTR	NA	NA
cg13863103	0.348813198	0.088825352	3.926955413	8.60E-05	0.175	0.523	0.034883186	I	Grn	9	98902324	F	rs78501822	NA	NA	NA	NA	NA
cg13885965	-0.627841584	0.163918671	-3.830201767	0.000128038	-0.949	-0.307	0.038586172	I	Red	6	30712409	R	NA	IER3	NM_003897	TSS200	chr6:30710307-30712440	Island
cg13890451	-0.606080235	0.158195435	-3.831211907	0.000127514	-0.916	-0.296	0.038524825	I	Grn	10	118926475	R	NA	NA	NA	NA	chr10:118927021-118928132	N_Shore
cg13900113	-0.578989515	0.146640058	-3.948372105	7.87E-05	-0.866	-0.292	0.03404834	I	Red	1	41131309	F	NA	RIMS3;RIMS3	NM_014747;NM_014747	1stExon;5'UTR	chr1:41131111-41131378	Island
cg13906045	-0.319544485	0.071961605	-4.440485789	8.98E-06	-0.461	-0.179	0.020877178	I	Red	3	14166433	F	NA	CHCHD4;CHCHD4;TMEM43	NM_001098502;NM_144636;NM_024334	TSS200;TSS200;TSS200	chr3:14165717-14166999	Island
cg13907959	-0.1813724	0.048333813	-3.752495179	0.000175083	-0.276	-0.087	0.042057126	I	Red	1	228645522	F	NA	HIST3H2BB;HIST3H2A;HIST3H2A	NM_175055;NM_033445;NM_033445	TSS1500;1stExon;5'UTR	chr1:228645196-228646434	Island
cg13912887	0.227066502	0.060397835	3.759513941	0.000170244	0.109	0.345	0.041684676	I	Red	9	140328737	R	NA	NOXA1	NM_006647	Body	chr9:140329454-140329710	N_Shore
cg13916967	-0.365458077	0.098123374	-3.72447524	0.000195722	-0.558	-0.173	0.043426453	I	Red	11	16635104	F	rs75223904	NA	NA	NA	chr11:16634957-16635969	Island
cg13921910	-0.617995425	0.16719576	-3.696238612	0.000218817	-0.946	-0.29	0.044921115	I	Grn	11	123301758	F	NA	NA	NA	NA	chr11:123301049-123302149	Island
cg13924326	0.674776488	0.18097735	3.728513472	0.000192613	0.32	1.029	0.043274288	II	NA	9	138670828	F	rs11103183	KCNT1	NM_020822	Body	chr9:138670608-138670837	Island
cg13962943	-0.719393146	0.1755785	-4.097273561	4.18E-05	-1.064	-0.375	0.029423672	I	Red	6	33385698	R	NA	CUTA;CUTA;CUTA;CUTA;CUTA;CUTA;CUTA	NM_001014433;NM_001014840;NM_015921;NM_001014838;NM_015921;NM_001014837;NM_001014838	Body;Body;5'UTR;1stExon;1stExon;5'UTR;5'UTR	chr6:33385678-33386262	Island
cg13965144	0.507198979	0.13716	3.69786366	0.000217422	0.238	0.776	0.044862218	II	NA	19	16222683	R	NA	RAB8A;RAB8A	NM_005370;NM_005370	5'UTR;1stExon	chr19:16222112-16223152	Island
cg13965897	-0.375205443	0.097637395	-3.842845694	0.000121616	-0.567	-0.184	0.038020603	I	Red	6	30658657	F	NA	NRM	NM_007243	1stExon	chr6:30654392-30654934	S_Shelf
cg13978100	-0.456752257	0.123291011	-3.704667951	0.000211668	-0.698	-0.215	0.044547509	I	Red	9	103361058	F	NA	NA	NA	NA	chr9:103360955-103361312	Island
cg13986503	-0.547406155	0.14821593	-3.693301762	0.000221361	-0.838	-0.257	0.045007632	I	Grn	11	126152983	R	NA	TIRAP;TIRAP;TIRAP;TIRAP	NM_001039661;NM_001039661;NM_148910;NM_148910	5'UTR;1stExon;1stExon;5'UTR	chr11:126152722-126153400	Island
cg14001558	-0.229667726	0.063598496	-3.611213153	0.000304768	-0.354	-0.105	0.049603937	I	Red	10	95256348	F	rs11187467	CEP55;CEP55	NM_018131;NM_001127182	TSS200;TSS200	chr10:95256133-95256562	Island
cg14002950	-0.613690169	0.153095297	-4.008550097	6.11E-05	-0.914	-0.314	0.032349334	I	Red	11	65245129	R	NA	NA	NA	NA	chr11:65244636-65245130	Island
cg14014890	-0.384960911	0.104143649	-3.69644153	0.000218643	-0.589	-0.181	0.04490423	I	Red	2	11295833	R	NA	PQLC3	NM_152391	Body	chr2:11295559-11296006	Island
cg14018797	0.265758159	0.069453588	3.826413664	0.000130024	0.13	0.402	0.038626384	I	Red	7	1849782	R	NA	NA	NA	NA	NA	NA
cg14026485	0.189871401	0.051952572	3.654706504	0.000257476	0.088	0.292	0.047012824	II	NA	9	74979581	F	rs2224603	ZFAND5;ZFAND5;ZFAND5	NM_001102421;NM_001102420;NM_006007	5'UTR;5'UTR;5'UTR	chr9:74979145-74980744	Island
cg14029663	-0.314928473	0.081586317	-3.860064828	0.000113357	-0.475	-0.155	0.03735502	II	NA	14	50582909	R	NA	C14orf138;C14orf138	NM_001040662;NM_024558	Body;Body	chr14:50582970-50583504	N_Shore
cg14044375	0.655747085	0.174828779	3.750796005	0.000176274	0.313	0.998	0.042087917	II	NA	2	232085909	F	NA	ARMC9	NM_025139	Body	NA	NA
cg14047630	0.744488718	0.201353415	3.697422855	0.000217799	0.35	1.139	0.044868229	II	NA	10	132944831	R	NA	TCERG1L	NM_174937	Body	NA	NA
cg14056470	0.194729946	0.053244738	3.657261816	0.000254924	0.09	0.299	0.04678312	I	Grn	19	40317494	R	NA	DYRK1B;DYRK1B;DYRK1B	NM_006484;NM_004714;NM_006483	Body;Body;Body	chr19:40314926-40315144	S_Shelf
cg14059420	-0.45017523	0.106028604	-4.245790394	2.18E-05	-0.658	-0.242	0.025526866	I	Red	11	43600495	F	NA	NA	NA	NA	chr11:43600712-43601409	N_Shore
cg14080254	-0.202095025	0.051757717	-3.904635614	9.44E-05	-0.304	-0.101	0.035550511	I	Red	11	46722302	F	NA	ZNF408;ARHGAP1	NM_024741;NM_004308	TSS200;TSS200	chr11:46721979-46722428	Island
cg14087083	0.550435504	0.149325528	3.686144694	0.000227677	0.258	0.843	0.045246176	I	Red	10	104575064	F	NA	C10orf26;C10orf26	NM_001083913;NM_017787	3'UTR;3'UTR	NA	NA
cg14089512	-0.459196843	0.112879467	-4.06802808	4.74E-05	-0.68	-0.238	0.030242045	I	Red	10	102106757	F	NA	SCD	NM_005063	TSS200	chr10:102106182-102107722	Island
cg14094983	-0.648773464	0.152306435	-4.259658907	2.05E-05	-0.947	-0.35	0.02478885	I	Grn	7	8482099	F	NA	NXPH1	NM_152745	Body	chr7:8481974-8482762	Island
cg14105000	0.306048373	0.079146254	3.866871241	0.000110241	0.151	0.461	0.036972901	I	Grn	17	55193516	F	rs75634100	AKAP1	NM_003488	Body	NA	NA
cg14121301	0.463696312	0.112654772	4.116082284	3.85E-05	0.243	0.684	0.029421726	I	Grn	14	101307418	F	NA	MEG3;MEG3;MEG3	NR_003531;NR_003530;NR_002766	Body;Body;Body	NA	NA
cg14148016	0.469950189	0.116934584	4.018915288	5.85E-05	0.241	0.699	0.031894694	I	Red	9	138874126	F	NA	NA	NA	NA	chr9:138873235-138874005	S_Shore
cg14168923	-0.273961361	0.065032847	-4.212661331	2.52E-05	-0.401	-0.146	0.026570762	I	Red	13	28366606	F	NA	GSX1	NM_145657	TSS200	chr13:28366549-28368505	Island
cg14171430	1.186621471	0.301257299	3.938897	8.19E-05	0.596	1.777	0.034533653	II	NA	18	76474705	F	rs12607568	NA	NA	NA	NA	NA
cg14200826	-0.677636544	0.172307082	-3.932726019	8.40E-05	-1.015	-0.34	0.034766319	I	Grn	19	45999794	F	NA	RTN2;RTN2	NM_206900;NM_005619	Body;Body	chr19:45999761-46000210	Island
cg14204600	0.474282643	0.125836207	3.769047497	0.000163872	0.228	0.721	0.041266227	I	Red	14	104000460	F	NA	TRMT61A	NM_152307	Body	chr14:104000887-104001138	N_Shore
cg14210275	-0.480996202	0.130035301	-3.698966356	0.000216479	-0.736	-0.226	0.044762902	I	Red	17	8079506	F	NA	TMEM107;TMEM107	NM_032354;NM_183065	Body;Body	chr17:8079490-8080125	Island
cg14216876	0.378999869	0.099139758	3.822884733	0.000131899	0.185	0.573	0.038710152	I	Grn	1	2717193	F	NA	NA	NA	NA	chr1:2716741-2717233	Island
cg14220272	0.444472024	0.114716085	3.874539673	0.000106826	0.22	0.669	0.036731953	II	NA	21	38445791	R	NA	PIGP;PIGP;TTC3;PIGP	NR_028352;NM_153682;NM_001001894;NM_153681	TSS1500;TSS1500;5'UTR;TSS1500	chr21:38444860-38446497	Island
cg14223613	0.204902935	0.056374127	3.634698144	0.000278306	0.094	0.315	0.048423077	I	Red	15	80884071	R	NA	ARNT2	NM_014862	Body	NA	NA
cg14228980	0.288457727	0.078315748	3.683265929	0.000230265	0.135	0.442	0.04545524	I	Red	17	78122221	R	NA	EIF4A3	NM_014740	TSS1500	chr17:78120322-78121543	S_Shore
cg14237975	-0.399302934	0.098784846	-4.042147667	5.30E-05	-0.593	-0.206	0.03109382	I	Red	19	11593403	F	rs4804599	NA	NA	NA	chr19:11590295-11593643	Island
cg14242958	-0.823367174	0.210892521	-3.904202804	9.45E-05	-1.237	-0.41	0.035550511	I	Red	11	101785693	R	NA	KIAA1377;ANGPTL5	NM_020802;NM_178127	TSS200;5'UTR	chr11:101785594-101786128	Island
cg14253461	0.320353518	0.083829191	3.821503162	0.000132641	0.156	0.485	0.038710152	I	Red	2	105363367	R	NA	NA	NA	NA	NA	NA
cg14257369	-0.255361537	0.068906664	-3.705904822	0.000210637	-0.39	-0.12	0.044483246	I	Grn	19	639566	F	NA	FGF22	NM_020637	TSS1500	chr19:639565-640370	Island
cg14271713	0.53101003	0.112488849	4.720557048	2.35E-06	0.311	0.751	0.019288532	I	Red	9	136153846	R	NA	NA	NA	NA	chr9:136150031-136151365	S_Shelf
cg14281087	0.319037148	0.086682426	3.680528582	0.000232751	0.149	0.489	0.045645875	I	Grn	2	220421331	F	NA	OBSL1	NM_015311	Body	chr2:220420729-220420994	S_Shore
cg14284424	0.189465415	0.045909221	4.126957741	3.68E-05	0.099	0.279	0.029421726	I	Red	9	132199267	R	NA	NA	NA	NA	chr9:132199361-132199984	N_Shore
cg14297063	0.433401709	0.106100369	4.084827519	4.41E-05	0.225	0.641	0.02992228	I	Grn	9	133778136	R	NA	FIBCD1;FIBCD1	NM_032843;NM_001145106	3'UTR;3'UTR	chr9:133779454-133779934	N_Shore
cg14300347	0.203701816	0.05313185	3.83389276	0.000126131	0.1	0.308	0.038321768	I	Red	6	32096845	F	rs35245338	ATF6B;ATF6B;FKBPL	NM_004381;NM_001136153;NM_022110	TSS1500;TSS1500;Body	chr6:32097820-32098086	N_Shore
cg14303778	1.511594888	0.368778545	4.098923074	4.15E-05	0.789	2.234	0.029421726	II	NA	8	1616111	F	NA	DLGAP2	NM_004745	Body	chr8:1616521-1616876	N_Shore
cg14307223	0.200044278	0.0551614	3.626526486	0.000287259	0.092	0.308	0.048794813	II	NA	2	128221129	R	NA	NA	NA	NA	NA	NA
cg14325029	0.23510549	0.063177863	3.721327056	0.000198179	0.111	0.359	0.043498886	I	Red	10	121212218	F	NA	GRK5	NM_005308	Body	NA	NA
cg14337668	0.328762667	0.08436308	3.896996955	9.74E-05	0.163	0.494	0.035714044	I	Red	9	99883682	R	NA	NA	NA	NA	chr9:99883497-99883763	Island
cg14374347	0.317011673	0.087104306	3.639448945	0.000273222	0.146	0.488	0.047959033	II	NA	1	38158195	R	NA	CDCA8;CDCA8	NM_018101;NM_018101	1stExon;5'UTR	chr1:38157295-38158586	Island
cg14377922	0.449513061	0.121816371	3.690087454	0.000224177	0.211	0.688	0.045113145	II	NA	2	23840537	F	rs80351465	KLHL29	NM_052920	Body	NA	NA
cg14381945	0.368075987	0.097709334	3.767050392	0.000165188	0.177	0.56	0.041297938	I	Red	21	47330914	R	NA	PCBP3;PCBP3	NM_020528;NM_001130141	Body;Body	chr21:47333947-47334449	N_Shelf
cg14398946	-0.349306839	0.087600134	-3.987514896	6.68E-05	-0.521	-0.178	0.032754148	I	Red	9	132258775	F	NA	NA	NA	NA	chr9:132258213-132259153	Island
cg14410589	0.36114496	0.0959223	3.764973924	0.000166566	0.173	0.549	0.041454224	II	NA	9	14346834	F	NA	NA	NA	NA	chr9:14346265-14348149	Island
cg14411282	0.896658075	0.206976998	4.33216292	1.48E-05	0.491	1.302	0.024222597	II	NA	9	140476961	R	NA	ZMYND19	NM_138462	3'UTR	chr9:140473002-140473681	S_Shelf
cg14426517	-0.503632952	0.124060466	-4.059576484	4.92E-05	-0.747	-0.26	0.030285203	I	Grn	6	153323975	F	rs3818129	MTRF1L;MTRF1L	NM_001114184;NM_019041	TSS200;TSS200	chr6:153323534-153324320	Island
cg14433983	0.309978279	0.085575074	3.622296336	0.000291999	0.142	0.478	0.049062216	I	Red	11	636460	R	NA	DRD4	NM_000797	TSS1500	chr11:636435-636668	Island
cg14454397	-0.467685184	0.127086138	-3.680064484	0.000233175	-0.717	-0.219	0.045685735	I	Grn	2	225450036	F	NA	CUL3;CUL3	NM_003590;NM_003590	5'UTR;1stExon	chr2:225449256-225450488	Island
cg14462015	-0.758205963	0.207476487	-3.654418741	0.000257765	-1.165	-0.352	0.047012824	I	Red	4	79860507	F	NA	PAQR3;PAQR3	NM_001040202;NM_001040202	1stExon;5'UTR	chr4:79860213-79860745	Island
cg14462553	0.198656102	0.047255633	4.203860813	2.62E-05	0.106	0.291	0.02699121	I	Red	7	157444239	R	NA	PTPRN2;PTPRN2;PTPRN2	NM_002847;NM_130842;NM_130843	Body;Body;Body	chr7:157440024-157442721	S_Shore
cg14462906	0.363594793	0.092630026	3.925236846	8.66E-05	0.182	0.545	0.034883186	I	Red	18	72201058	R	NA	CNDP1	NM_032649	TSS1500	NA	NA
cg14468055	0.30569662	0.08222445	3.717831125	0.000200941	0.145	0.467	0.043768072	I	Red	9	136003437	F	NA	RALGDS	NM_001042368	Body	NA	NA
cg14487595	-0.406352623	0.103960987	-3.908703007	9.28E-05	-0.61	-0.203	0.035526635	I	Grn	6	43597054	F	NA	MAD2L1BP;GTPBP2	NM_001003690;NM_019096	TSS1500;TSS200	chr6:43596790-43597690	Island
cg14500798	-0.24360404	0.053253536	-4.574420014	4.78E-06	-0.348	-0.139	0.019595269	I	Red	7	98100126	F	NA	NA	NA	NA	chr7:98099882-98100289	Island
cg14517004	0.456587982	0.090526334	5.043703459	4.57E-07	0.279	0.634	0.014779204	I	Red	22	48946660	R	NA	FAM19A5	NM_001082967	Body	NA	NA
cg14520947	0.447830595	0.10666944	4.198302653	2.69E-05	0.239	0.657	0.027277603	II	NA	1	225942842	R	NA	NA	NA	NA	NA	NA
cg14522427	-0.286032407	0.076361874	-3.745748906	0.000179856	-0.436	-0.136	0.042348424	I	Red	10	73533468	R	NA	CDH23;C10orf54	NM_022124;NM_022153	Body;TSS200	chr10:73533091-73533492	Island
cg14522944	0.451590271	0.117780536	3.834167233	0.00012599	0.221	0.682	0.038321768	I	Grn	1	1961743	R	NA	GABRD	NM_000815	3'UTR	chr1:1961407-1961850	Island
cg14536467	0.31110638	0.079125387	3.931814956	8.43E-05	0.156	0.466	0.034796783	I	Red	19	17412305	F	NA	ABHD8	NM_024527	Body	chr19:17412036-17412417	Island
cg14537507	0.608166082	0.149336781	4.0724467	4.65E-05	0.315	0.901	0.030242045	II	NA	5	130970729	F	NA	RAPGEF6;RAPGEF6;RAPGEF6;RAPGEF6;RAPGEF6;RAPGEF6;RAPGEF6;RAPGEF6;RAPGEF6;RAPGEF6;RAPGEF6;RAPGEF6	NM_001164389;NM_001164389;NM_001164387;NM_001164390;NM_001164388;NM_001164388;NM_001164386;NM_016340;NM_016340;NM_001164386;NM_001164387;NM_001164390	5'UTR;1stExon;1stExon;1stExon;5'UTR;1stExon;5'UTR;5'UTR;1stExon;1stExon;5'UTR;5'UTR	chr5:130970415-130971505	Island
cg14546197	-0.323570304	0.079778627	-4.055851999	5.00E-05	-0.48	-0.167	0.030412231	I	Red	17	38137043	R	NA	PSMD3	NM_002809	TSS200	chr17:38136650-38137490	Island
cg14547966	0.409932683	0.113399181	3.614952767	0.000300402	0.188	0.632	0.04944806	I	Red	22	20941639	R	NA	MED15;MED15	NM_015889;NM_001003891	3'UTR;3'UTR	chr22:20939102-20939353	S_Shelf
cg14548542	0.371781367	0.096283792	3.861307908	0.000112782	0.183	0.56	0.03735502	I	Red	9	139566734	F	rs78568191	EGFL7;EGFL7	NM_016215;NM_201446	Body;Body	chr9:139564999-139565286	S_Shore
cg14550145	0.271263949	0.059823924	4.534372413	5.78E-06	0.154	0.389	0.020026345	I	Red	10	7618474	F	rs2275068	ITIH5;ITIH5;ITIH5	NM_030569;NM_032817;NM_001001851	Body;Body;Body	chr10:7618377-7618615	Island
cg14572091	0.416496806	0.09019538	4.617717741	3.88E-06	0.24	0.593	0.019595269	I	Red	9	136537981	R	NA	SARDH;SARDH	NM_001134707;NM_007101	Body;Body	NA	NA
cg14582154	0.62445777	0.168511146	3.705735707	0.000210778	0.294	0.955	0.044493587	II	NA	6	170531367	F	NA	NA	NA	NA	chr6:170529588-170530672	S_Shore
cg14585694	-0.381656352	0.094572721	-4.035586017	5.45E-05	-0.567	-0.196	0.031154115	I	Grn	11	120081506	R	NA	OAF	NM_178507	TSS1500	chr11:120081487-120082345	Island
cg14588828	0.27901863	0.064342856	4.336435246	1.45E-05	0.153	0.405	0.024222597	I	Red	9	117108451	F	rs902489	AKNA	NM_030767	Body	NA	NA
cg14591386	-0.419783115	0.115637069	-3.630177765	0.000283226	-0.646	-0.193	0.048696512	I	Red	6	97345725	R	NA	NDUFAF4;NDUFAF4	NM_014165;NM_014165	5'UTR;1stExon	chr6:97345266-97345973	Island
cg14593956	-0.477956154	0.130710988	-3.656587434	0.000255595	-0.734	-0.222	0.046845815	I	Red	5	138677986	R	NA	PAIP2;PAIP2	NM_001033112;NM_016480	TSS200;5'UTR	chr5:138677333-138678248	Island
cg14604369	0.186235942	0.048205236	3.863396535	0.000111821	0.092	0.281	0.03718532	II	NA	4	166248057	F	NA	SC4MOL;SC4MOL	NM_006745;NM_001017369	TSS1500;TSS1500	chr4:166248454-166249063	N_Shore
cg14604522	0.200307103	0.054501454	3.675261617	0.000237606	0.093	0.307	0.045912367	I	Red	5	178577570	R	NA	ADAMTS2	NM_014244	Body	NA	NA
cg14631690	0.282761149	0.073501004	3.847037914	0.000119554	0.139	0.427	0.037921489	I	Grn	5	1335196	F	NA	CLPTM1L	NM_030782	Body	chr5:1335077-1335280	Island
cg14634903	-0.351434726	0.086117102	-4.080893522	4.49E-05	-0.52	-0.183	0.030015649	I	Red	20	278097	R	NA	ZCCHC3	NM_033089	TSS200	chr20:277831-279155	Island
cg14667104	0.79300287	0.190520181	4.162303778	3.15E-05	0.42	1.166	0.02852778	II	NA	12	120578192	R	NA	GCN1L1	NM_006836	Body	NA	NA
cg14669515	0.540015018	0.146943714	3.674978691	0.000237869	0.252	0.828	0.045912367	I	Grn	1	9386821	R	NA	SPSB1	NM_025106	5'UTR	NA	NA
cg14679444	0.287818979	0.066036698	4.358470164	1.31E-05	0.158	0.417	0.023816414	I	Grn	22	50470101	F	NA	TTLL8	NM_001080447	Body	chr22:50469866-50470420	Island
cg14714364	0.556818252	0.131701272	4.227888189	2.36E-05	0.299	0.815	0.025998984	I	Red	11	2191606	F	NA	TH;TH;TH	NM_199292;NM_199293;NM_000360	Body;Body;Body	chr11:2187488-2188245	S_Shelf
cg14759964	-0.289573446	0.079236655	-3.654539012	0.000257644	-0.445	-0.134	0.047012824	I	Red	4	106395119	R	NA	PPA2;PPA2;PPA2;PPA2;PPA2	NM_176867;NM_006903;NM_001034191;NM_176869;NM_176866	1stExon;1stExon;1stExon;1stExon;1stExon	chr4:106394551-106395322	Island
cg14769373	0.402890216	0.107540362	3.746409348	0.000179384	0.192	0.614	0.042326491	I	Red	6	40998127	F	rs736795	UNC5CL	NM_173561	Body	chr6:40995802-40996241	S_Shore
cg14774045	-0.372269491	0.086054288	-4.32598419	1.52E-05	-0.541	-0.204	0.024222597	I	Red	20	46130592	F	NA	NCOA3;NCOA3	NM_006534;NM_181659	TSS200;TSS200	chr20:46130428-46131057	Island
cg14785381	0.258298289	0.06900607	3.743124144	0.000181746	0.123	0.394	0.042525324	I	Red	15	22969267	F	rs74003075	CYFIP1;CYFIP1	NM_014608;NM_001033028	Body;Body	NA	NA
cg14789178	-0.245030324	0.061739739	-3.968761925	7.22E-05	-0.366	-0.124	0.033182459	I	Red	19	5904119	R	NA	VMAC;NDUFA11	NM_001017921;NM_175614	TSS1500;TSS200	chr19:5903482-5905216	Island
cg14793819	-0.473088869	0.118495037	-3.992478357	6.54E-05	-0.705	-0.241	0.032748156	I	Grn	3	196669628	R	NA	LOC152217;NCBP2;NCBP2	NR_024388;NM_001042540;NM_007362	Body;TSS200;TSS200	chr3:196668695-196670054	Island
cg14802876	-0.468622602	0.125879919	-3.722774909	0.000197045	-0.715	-0.222	0.043485363	I	Grn	6	34217098	F	NA	C6orf1;C6orf1;C6orf1	NM_001008703;NM_178508;NM_001008704	TSS200;TSS200;TSS200	chr6:34216408-34217348	Island
cg14803306	-0.42173646	0.112767606	-3.739872413	0.000184114	-0.643	-0.201	0.042622298	I	Grn	2	47499716	F	NA	NA	NA	NA	chr2:47499464-47499813	Island
cg14823789	-0.53853873	0.125429842	-4.293545468	1.76E-05	-0.784	-0.293	0.024222597	I	Red	17	72322612	F	NA	KIF19	NM_153209	Body	chr17:72321948-72322461	S_Shore
cg14825729	-0.292248844	0.075387818	-3.876605694	0.000105924	-0.44	-0.144	0.036634949	I	Red	4	147866863	F	NA	TTC29;TTC29	NM_031956;NM_031956	5'UTR;1stExon	chr4:147866829-147867159	Island
cg14830082	0.511355996	0.133243143	3.837765944	0.000124159	0.25	0.773	0.038212771	I	Red	11	130067806	F	NA	ST14	NM_021978	Body	NA	NA
cg14839371	0.222104415	0.055694676	3.987893127	6.67E-05	0.113	0.331	0.032754148	I	Red	4	2831238	F	NA	SH3BP2;SH3BP2;SH3BP2;SH3BP2	NM_001122681;NM_001145855;NM_003023;NM_001145856	Body;Body;Body;Body	NA	NA
cg14849479	0.432555199	0.109103639	3.96462671	7.35E-05	0.219	0.646	0.033313339	I	Red	5	60039648	F	NA	NA	NA	NA	chr5:60039587-60039835	Island
cg14857596	-0.215295573	0.058401104	-3.686498355	0.000227361	-0.33	-0.101	0.045246176	I	Red	12	72233493	F	NA	TBC1D15;TBC1D15;TBC1D15;TBC1D15;TBC1D15;TBC1D15;TBC1D15	NM_001146213;NM_001146213;NM_022771;NM_001146214;NR_027449;NM_022771;NM_001146214	1stExon;5'UTR;5'UTR;5'UTR;Body;1stExon;1stExon	chr12:72233323-72233635	Island
cg14866240	0.35602184	0.093424611	3.810792848	0.000138522	0.173	0.539	0.038987826	I	Red	19	36032850	F	rs73046807	GAPDHS	NM_014364	Body	chr19:36036002-36036607	N_Shelf
cg14872693	-0.422134293	0.10043525	-4.203049172	2.63E-05	-0.619	-0.225	0.027005342	I	Red	11	65190203	F	NA	NEAT1	NR_028272	TSS200	chr11:65189463-65190295	Island
cg14893690	-0.705419008	0.19524175	-3.613054111	0.000302612	-1.088	-0.323	0.049486529	I	Red	13	48807223	F	NA	ITM2B	NM_021999	TSS200	chr13:48806982-48807948	Island
cg14912728	-0.372237167	0.100555764	-3.701798397	0.000214077	-0.569	-0.175	0.044588933	I	Red	17	15164634	F	NA	PMP22;PMP22;PMP22	NM_153321;NM_153322;NM_000304	5'UTR;TSS1500;5'UTR	chr17:15163930-15164810	Island
cg14942134	-0.276786955	0.076037458	-3.640139487	0.00027249	-0.426	-0.128	0.047958301	I	Red	8	94929220	R	NA	PDP1;PDP1;PDP1;PDP1;PDP1;PDP1;PDP1;PDP1	NM_001161780;NM_001161780;NM_018444;NM_001161778;NM_001161781;NM_018444;NM_001161779;NM_001161779	1stExon;5'UTR;1stExon;TSS1500;TSS200;5'UTR;5'UTR;1stExon	chr8:94928518-94930124	Island
cg14953590	-0.260312669	0.068784915	-3.784444129	0.000154053	-0.395	-0.125	0.040478954	I	Grn	6	117586666	F	NA	VGLL2;VGLL2	NM_153453;NM_182645	TSS200;TSS200	chr6:117586482-117587156	Island
cg14965968	-0.201172608	0.052288155	-3.847383931	0.000119386	-0.304	-0.099	0.037909249	I	Red	3	44803235	F	NA	KIF15;KIF15;KIAA1143	NM_020242;NM_020242;NM_020696	1stExon;5'UTR;TSS200	chr3:44802852-44803618	Island
cg14976971	-0.269036241	0.07249367	-3.711168708	0.000206305	-0.411	-0.127	0.044165261	I	Red	1	229478633	R	NA	C1orf96	NM_145257	5'UTR	chr1:229478014-229478935	Island
cg15004027	-0.38401099	0.103908016	-3.695682072	0.000219297	-0.588	-0.18	0.044936151	I	Red	11	71823924	F	NA	C11orf51	NM_014042	TSS200	chr11:71823668-71823975	Island
cg15022039	-0.589087401	0.158706894	-3.711794664	0.000205795	-0.9	-0.278	0.044165261	I	Red	5	139081063	F	NA	NA	NA	NA	chr5:139081001-139081202	Island
cg15036284	0.151191266	0.039959494	3.783613072	0.000154568	0.073	0.23	0.040478954	II	NA	7	42972593	R	NA	MRPL32;PSMA2	NM_031903;NM_002787	Body;TSS1500	chr7:42971634-42972299	S_Shore
cg15065627	0.264121276	0.068571881	3.85174318	0.00011728	0.13	0.399	0.037634396	II	NA	2	237796583	R	NA	NA	NA	NA	NA	NA
cg15084390	-0.211953336	0.057463442	-3.68849008	0.000225589	-0.325	-0.099	0.045113145	I	Red	5	475085	R	NA	SLC9A3	NM_004174	Body	chr5:474958-475319	Island
cg15087571	-0.488043287	0.116485275	-4.18974232	2.79E-05	-0.716	-0.26	0.027816265	I	Red	7	5462185	F	NA	TNRC18	NM_001080495	5'UTR	chr7:5458503-5469256	Island
cg15094119	1.196753496	0.32657145	3.664599263	0.000247726	0.557	1.837	0.046590992	II	NA	7	157670003	R	NA	PTPRN2;PTPRN2;PTPRN2	NM_002847;NM_130842;NM_130843	Body;Body;Body	chr7:157669879-157670095	Island
cg15133313	-0.368079753	0.084562141	-4.352772414	1.34E-05	-0.534	-0.202	0.024129223	I	Red	6	53213956	R	NA	ELOVL5	NM_021814	TSS200	chr6:53212617-53214043	Island
cg15135241	0.365791283	0.086533244	4.227176364	2.37E-05	0.196	0.535	0.025998984	I	Red	17	38523732	R	NA	NA	NA	NA	chr17:38518965-38520264	S_Shelf
cg15163603	0.219871875	0.05346271	4.112621186	3.91E-05	0.115	0.325	0.029421726	I	Red	12	132403897	R	NA	ULK1	NM_003565	Body	NA	NA
cg15193782	-0.397879089	0.096662221	-4.116179886	3.85E-05	-0.587	-0.208	0.029421726	I	Red	10	23217017	R	NA	ARMC3;ARMC3	NM_173081;NM_173081	5'UTR;1stExon	NA	NA
cg15201536	-0.509421401	0.11154541	-4.566941856	4.95E-06	-0.728	-0.291	0.019595269	I	Red	19	20162840	R	NA	NA	NA	NA	chr19:20162772-20163107	Island
cg15204119	-0.254061874	0.062550577	-4.061703119	4.87E-05	-0.377	-0.131	0.030242045	I	Red	19	10613180	F	rs10412246	KEAP1;KEAP1	NM_203500;NM_012289	5'UTR;5'UTR	chr19:10613046-10614280	Island
cg15230900	0.990832151	0.265654182	3.729781866	0.000191646	0.47	1.512	0.043143241	II	NA	7	157643125	R	NA	PTPRN2;PTPRN2;PTPRN2	NM_002847;NM_130842;NM_130843	Body;Body;Body	NA	NA
cg15241390	-0.568591342	0.137638749	-4.131041183	3.61E-05	-0.838	-0.299	0.029421726	I	Red	2	190648693	F	rs5742924	ORMDL1;ORMDL1;PMS1;PMS1;PMS1	NM_016467;NM_001128150;NM_001128143;NM_001128144;NM_000534	5'UTR;5'UTR;TSS200;TSS200;TSS200	chr2:190648566-190649484	Island
cg15254424	-0.284375619	0.065814969	-4.32083494	1.55E-05	-0.413	-0.155	0.024222597	I	Grn	3	50388344	F	rs2233476	TUSC4;CYB561D2;CYB561D2;TUSC4	NM_006545;NM_007022;NM_007022;NM_006545	5'UTR;1stExon;5'UTR;1stExon	chr3:50387959-50388681	Island
cg15282281	0.526391663	0.135964075	3.871549621	0.000108146	0.26	0.793	0.036783922	I	Red	10	88024557	F	NA	MIR346;GRID1	NR_029907;NM_017551	TSS200;Body	chr10:88022640-88023279	S_Shore
cg15296644	0.284755316	0.077657749	3.666798482	0.000245606	0.133	0.437	0.046481088	I	Red	13	112856953	F	NA	NA	NA	NA	NA	NA
cg15321997	-0.395830287	0.096469546	-4.103163165	4.08E-05	-0.585	-0.207	0.029421726	I	Grn	8	23315326	R	NA	ENTPD4;ENTPD4	NM_004901;NM_001128930	TSS200;TSS200	chr8:23314664-23315490	Island
cg15345415	-0.168810529	0.046650074	-3.618655122	0.000296138	-0.26	-0.077	0.049188294	I	Red	5	151150903	R	NA	G3BP1;G3BP1	NM_198395;NM_005754	TSS1500;TSS1500	chr5:151150014-151152086	Island
cg15357639	0.571457267	0.150164781	3.805534578	0.000141498	0.277	0.866	0.039368142	II	NA	3	9790443	R	NA	OGG1;OGG1;OGG1;OGG1;OGG1;OGG1;OGG1;OGG1	NM_016828;NM_016827;NM_016821;NM_016819;NM_002542;NM_016820;NM_016826;NM_016829	TSS1500;TSS1500;TSS1500;TSS1500;TSS1500;TSS1500;TSS1500;TSS1500	chr3:9791123-9792011	N_Shore
cg15385562	-0.478017659	0.107448979	-4.448787355	8.64E-06	-0.689	-0.267	0.020877178	I	Red	15	48938239	F	NA	FBN1	NM_000138	TSS1500	chr15:48936810-48938577	Island
cg15406010	-0.530105283	0.145220734	-3.65034158	0.000261892	-0.815	-0.245	0.047268257	I	Red	6	108478650	R	NA	NA	NA	NA	chr6:108478523-108479558	Island
cg15420153	-0.495219742	0.115506925	-4.287359769	1.81E-05	-0.722	-0.269	0.024222597	I	Red	10	72575517	F	NA	SGPL1	NM_003901	TSS200	chr10:72575513-72576302	Island
cg15420520	-0.298943217	0.068452712	-4.367149353	1.26E-05	-0.433	-0.165	0.02323787	I	Red	20	55043481	F	NA	C20orf43	NM_016407	TSS200	chr20:55043375-55043766	Island
cg15441230	-0.302202458	0.080749004	-3.742491443	0.000182205	-0.46	-0.144	0.042571024	I	Red	15	44069583	R	NA	ELL3	NM_025165	TSS200	chr15:44068586-44069792	Island
cg15452204	0.549280976	0.151658757	3.621821686	0.000292536	0.252	0.847	0.049092143	II	NA	5	149546471	R	NA	CDX1	NM_001804	1stExon	chr5:149546027-149546988	Island
cg15483436	0.447470386	0.106889219	4.18630045	2.84E-05	0.238	0.657	0.027816265	I	Red	14	105857208	F	NA	PACS2;PACS2	NM_015197;NM_001100913	Body;Body	NA	NA
cg15498283	-0.663572163	0.17402929	-3.812991258	0.000137295	-1.005	-0.322	0.038960227	I	Grn	11	747520	R	NA	TALDO1	NM_006755	1stExon	chr11:746877-748032	Island
cg15547669	-0.252307356	0.065626569	-3.844591571	0.000120753	-0.381	-0.124	0.037921489	I	Red	20	2781122	R	NA	CPXM1	NM_019609	1stExon	chr20:2780978-2781497	Island
cg15570464	0.561165156	0.13445936	4.173492692	3.00E-05	0.298	0.825	0.028253511	I	Red	6	1522087	R	NA	NA	NA	NA	chr6:1524153-1524543	N_Shelf
cg15596932	0.427025485	0.096248657	4.436690332	9.14E-06	0.238	0.616	0.021020268	I	Red	17	41836563	R	NA	SOST	NM_025237	TSS1500	chr17:41832717-41833195	S_Shelf
cg15611151	-0.365521893	0.101181307	-3.612543683	0.000303208	-0.564	-0.167	0.04949937	I	Red	12	54412269	R	NA	HOXC4;HOXC5;HOXC6	NM_014620;NR_003084;NM_153693	5'UTR;Body;5'UTR	chr12:54412990-54413346	N_Shore
cg15622917	0.641692028	0.161665862	3.969248805	7.21E-05	0.325	0.959	0.033182459	II	NA	1	10796823	F	rs880315	CASZ1;CASZ1	NM_001079843;NM_017766	5'UTR;5'UTR	NA	NA
cg15626105	0.421855731	0.111212652	3.793235056	0.000148697	0.204	0.64	0.040085681	II	NA	3	100690901	R	NA	ABI3BP	NM_015429	Body	NA	NA
cg15634922	-0.3665067	0.101315115	-3.617492795	0.000297471	-0.565	-0.168	0.049224795	I	Red	4	147867154	R	NA	TTC29	NM_031956	TSS200	chr4:147866829-147867159	Island
cg15640993	0.201620119	0.052101409	3.869763275	0.000108941	0.1	0.304	0.036807378	I	Grn	10	132031306	R	NA	NA	NA	NA	NA	NA
cg15641062	-0.835709193	0.217669379	-3.8393512	0.00012336	-1.262	-0.409	0.038212771	I	Grn	12	120884529	R	NA	TRIAP1;GATC	NM_016399;NM_176818	TSS1500;Body	chr12:120884047-120884703	Island
cg15668500	-0.201733584	0.053247053	-3.788633794	0.000151478	-0.306	-0.097	0.040279156	I	Red	10	99052215	F	rs28434206	ARHGAP19	NM_032900	Body	chr10:99051934-99052490	Island
cg15688396	-0.442620143	0.100988364	-4.382882603	1.17E-05	-0.641	-0.245	0.022914927	I	Grn	3	116163925	R	NA	LSAMP;LSAMP	NM_002338;NM_002338	5'UTR;1stExon	NA	NA
cg15689733	0.197850826	0.054253431	3.646789183	0.000265538	0.092	0.304	0.047561268	I	Red	7	157444235	R	NA	PTPRN2;PTPRN2;PTPRN2	NM_002847;NM_130842;NM_130843	Body;Body;Body	chr7:157440024-157442721	S_Shore
cg15691035	0.206586012	0.054788224	3.770628029	0.000162837	0.099	0.314	0.041091181	II	NA	3	45553017	R	NA	LARS2	NM_015340	Body	NA	NA
cg15695585	0.302593425	0.083750518	3.613033485	0.000302636	0.138	0.467	0.049486529	I	Grn	7	114562711	F	NA	MDFIC;MDFIC;MDFIC	NM_001166345;NM_199072;NM_001166346	5'UTR;Body;Body	chr7:114562170-114563193	Island
cg15720765	-0.336156385	0.082715503	-4.064007021	4.82E-05	-0.498	-0.174	0.030242045	I	Red	5	77944343	F	NA	LHFPL2;LHFPL2	NM_005779;NM_005779	1stExon;5'UTR	chr5:77943868-77945220	Island
cg15722372	0.874160132	0.228750927	3.821449563	0.00013267	0.426	1.323	0.038710152	II	NA	19	38865020	R	NA	PSMD8	NM_002812	TSS200	chr19:38865263-38865733	N_Shore
cg15722731	-0.357024324	0.083339844	-4.283957189	1.84E-05	-0.52	-0.194	0.024222597	I	Grn	6	122720674	R	NA	HSF2;HSF2	NM_004506;NM_001135564	TSS200;TSS200	chr6:122720607-122721366	Island
cg15729771	0.857331927	0.219378788	3.907998285	9.31E-05	0.427	1.287	0.0355295	II	NA	1	25071616	F	NA	CLIC4	NM_013943	TSS200	chr1:25071352-25072586	Island
cg15743358	-0.424048622	0.110365528	-3.842219829	0.000121927	-0.64	-0.208	0.038040146	I	Grn	6	28303923	R	NA	ZNF323;ZNF323;ZNF323;ZNF323;ZNF323;ZNF323;ZNF323	NM_030899;NR_024164;NM_001135215;NM_001135216;NM_030899;NM_145909;NR_024165	1stExon;TSS200;5'UTR;TSS200;5'UTR;5'UTR;Body	NA	NA
cg15748555	0.52064859	0.142742084	3.647477846	0.000264827	0.241	0.8	0.047554743	I	Red	2	23782147	F	NA	KLHL29	NM_052920	5'UTR	chr2:23785049-23785339	N_Shelf
cg15763984	0.538571185	0.146262212	3.682230541	0.000231202	0.252	0.825	0.045538108	I	Red	4	1342303	F	NA	KIAA1530	NM_020894	Body	chr4:1340107-1341471	S_Shore
cg15764058	-0.385677093	0.102393103	-3.766631559	0.000165465	-0.586	-0.185	0.04130582	I	Red	3	66024691	R	NA	MAGI1;MAGI1;MAGI1	NM_004742;NM_015520;NM_001033057	TSS200;TSS200;TSS200	chr3:66023373-66025595	Island
cg15783691	-0.230827611	0.057597341	-4.007608807	6.13E-05	-0.344	-0.118	0.032349334	I	Red	4	103749726	F	rs13117052	UBE2D3;UBE2D3;UBE2D3;UBE2D3;UBE2D3;UBE2D3;UBE2D3;UBE2D3;UBE2D3	NM_181887;NM_181891;NM_181888;NM_181892;NM_181893;NM_181889;NM_003340;NM_181890;NM_181886	TSS1500;TSS1500;TSS1500;TSS1500;Body;TSS1500;TSS1500;5'UTR;TSS1500	chr4:103747631-103749392	S_Shore
cg15798163	0.863272707	0.206212385	4.186328129	2.84E-05	0.459	1.267	0.027816265	I	Red	13	113933520	R	NA	NA	NA	NA	NA	NA
cg15825501	-0.637077124	0.163109758	-3.905818574	9.39E-05	-0.957	-0.317	0.035550511	I	Red	1	936610	F	NA	HES4;HES4	NM_001142467;NM_021170	TSS1500;TSS1500	chr1:933387-937410	Island
cg15829294	-0.233431178	0.059255203	-3.939420747	8.17E-05	-0.35	-0.117	0.034533653	I	Red	19	12606397	R	NA	ZNF709	NM_001145647	5'UTR	chr19:12606182-12606730	Island
cg15841944	0.691047358	0.176684924	3.911184635	9.18E-05	0.345	1.037	0.035278179	I	Red	2	97505787	R	NA	ANKRD23	NM_144994	Body	chr2:97505219-97505600	S_Shore
cg15860013	-0.316660172	0.073984423	-4.280092452	1.87E-05	-0.462	-0.172	0.024380182	I	Red	3	138327718	F	NA	FAIM;FAIM;FAIM;FAIM;FAIM;FAIM;FAIM	NM_001033030;NM_018147;NM_001033030;NM_001033031;NM_001033032;NM_001033032;NM_001033031	5'UTR;TSS200;1stExon;5'UTR;1stExon;5'UTR;1stExon	chr3:138327500-138328185	Island
cg15864906	0.440146641	0.105260625	4.181493689	2.90E-05	0.234	0.646	0.028031223	I	Red	14	103406384	F	NA	CDC42BPB	NM_006035	Body	chr14:103406206-103406683	Island
cg15887555	-0.325171932	0.08680012	-3.746215238	0.000179523	-0.495	-0.155	0.042326491	I	Grn	5	180673286	R	NA	NA	NA	NA	chr5:180673068-180673694	Island
cg15888301	-0.517754518	0.127371135	-4.064928205	4.80E-05	-0.767	-0.268	0.030242045	I	Red	15	73344233	R	NA	NEO1	NM_002499	TSS1500	chr15:73343779-73345369	Island
cg15894722	-0.570843764	0.150126497	-3.802418458	0.00014329	-0.865	-0.277	0.039415992	I	Red	12	54447596	R	NA	HOXC4;HOXC4	NM_014620;NM_153633	5'UTR;TSS200	chr12:54447744-54448091	N_Shore
cg15906761	0.401985014	0.105712402	3.802628682	0.000143169	0.195	0.609	0.039411825	I	Red	5	178623035	R	NA	ADAMTS2;ADAMTS2	NM_021599;NM_014244	Body;Body	NA	NA
cg15917704	-0.341232022	0.092625769	-3.683985843	0.000229615	-0.523	-0.16	0.045423006	I	Red	5	156569687	F	NA	MED7;MED7;MED7	NM_001100816;NM_001100816;NM_004270	1stExon;5'UTR;5'UTR	chr5:156569576-156570067	Island
cg15920017	-0.309884843	0.080973931	-3.82697045	0.00012973	-0.469	-0.151	0.038626384	I	Grn	6	90062628	F	NA	UBE2J1	NM_016021	TSS200	chr6:90062040-90062886	Island
cg15921587	-0.247084312	0.064476454	-3.832163476	0.000127021	-0.373	-0.121	0.038416128	I	Red	2	73144353	R	NA	EMX1	NM_004097	TSS1500	chr2:73143055-73148260	Island
cg15959262	0.415507551	0.110167176	3.771609336	0.000162198	0.2	0.631	0.041057927	I	Grn	8	102381107	R	NA	NACAP1	NR_002182	TSS200	NA	NA
cg15961887	-0.523340997	0.13924431	-3.758437215	0.000170978	-0.796	-0.25	0.041719339	I	Grn	4	71554203	R	NA	UTP3;UTP3	NM_020368;NM_020368	1stExon;5'UTR	chr4:71553854-71554473	Island
cg15963714	0.501948089	0.124171473	4.04237847	5.29E-05	0.259	0.745	0.03109382	I	Red	11	2017819	F	NA	H19	NR_002196	Body	chr11:2017459-2018253	Island
cg15979344	-0.550918285	0.146579594	-3.758492365	0.00017094	-0.838	-0.264	0.041719339	I	Grn	10	99496871	R	NA	ZFYVE27;ZFYVE27;ZFYVE27	NM_001002261;NM_144588;NM_001002262	TSS200;TSS200;TSS200	chr10:99496649-99497451	Island
cg15983200	-0.484977145	0.130195229	-3.724999374	0.000195316	-0.74	-0.23	0.043426453	I	Red	12	110562122	F	rs75470202	IFT81;IFT81;IFT81	NM_014055;NM_031473;NM_001143779	TSS200;TSS200;TSS200	chr12:110562095-110562700	Island
cg15988785	-0.281004878	0.062997112	-4.46059934	8.17E-06	-0.404	-0.158	0.020877178	II	NA	22	21389041	R	NA	NA	NA	NA	chr22:21386493-21387000	S_Shelf
cg16013966	0.597381357	0.143698632	4.157181939	3.22E-05	0.316	0.879	0.028742874	II	NA	11	62380545	F	NA	EML3;ROM1;ROM1	NM_153265;NM_000327;NM_000327	TSS1500;1stExon;5'UTR	chr11:62379638-62380556	Island
cg16015031	0.536639861	0.147843208	3.629790417	0.000283651	0.247	0.826	0.048713332	II	NA	6	25278978	R	NA	LRRC16A	NM_017640	TSS1500	chr6:25279131-25279890	N_Shore
cg16029838	-0.544572098	0.132268212	-4.117180454	3.84E-05	-0.804	-0.285	0.029421726	I	Red	7	44530503	R	NA	NUDCD3	NM_015332	TSS200	chr7:44529710-44530557	Island
cg16032518	-0.989361954	0.221427418	-4.468109512	7.89E-06	-1.423	-0.555	0.020877178	I	Red	5	140871464	R	NA	PCDHGA4;PCDHGC3;PCDHGA12;PCDHGA11;PCDHGA11;PCDHGA9;PCDHGA1;PCDHGB1;PCDHGB6;PCDHGB3;PCDHGB7;PCDHGA6;PCDHGA8;PCDHGA10;PCDHGA5;PCDHGB4;PCDHGC4;PCDHGA3;PCDHGA2;PCDHGA7;PCDHGB2;PCDHGC5;PCDHGB5;PCDHGC3	NM_018917;NM_002588;NM_003735;NM_032092;NM_018914;NM_018921;NM_018912;NM_018922;NM_018926;NM_018924;NM_018927;NM_018919;NM_032088;NM_018913;NM_018918;NM_003736;NM_018928;NM_018916;NM_018915;NM_018920;NM_018923;NM_018929;NM_018925;NM_032403	Body;Body;Body;Body;Body;Body;Body;Body;Body;Body;Body;Body;Body;Body;Body;Body;Body;Body;Body;Body;Body;Body;Body;Body	chr5:140871064-140872335	Island
cg16041981	0.224970249	0.057933073	3.883278344	0.000103057	0.111	0.339	0.036427231	I	Grn	13	114057379	R	NA	NA	NA	NA	chr13:114056100-114056577	S_Shore
cg16056044	-0.127119393	0.034264763	-3.709916002	0.000207328	-0.194	-0.06	0.044165261	II	NA	1	36705593	F	NA	THRAP3	NM_005119	5'UTR	NA	NA
cg16080427	0.221073842	0.061276541	3.607805529	0.000308798	0.101	0.341	0.049924093	I	Red	17	39975631	R	NA	FKBP10	NM_021939	Body	NA	NA
cg16082737	0.42172788	0.10005107	4.215126112	2.50E-05	0.226	0.618	0.026407026	II	NA	14	58711570	R	NA	PSMA3;PSMA3	NM_152132;NM_002788	TSS200;TSS200	chr14:58711351-58711897	Island
cg16136385	-0.537386261	0.140392269	-3.827748254	0.000129321	-0.813	-0.262	0.038626384	I	Red	11	46848389	R	NA	CKAP5;CKAP5	NM_014756;NM_001008938	5'UTR;5'UTR	NA	NA
cg16146432	0.434838491	0.106692882	4.075609193	4.59E-05	0.226	0.644	0.030242045	II	NA	3	167967220	R	NA	C3orf50	NR_021485	TSS200	chr3:167967246-167968130	N_Shore
cg16174102	0.192382908	0.048702208	3.950188595	7.81E-05	0.097	0.288	0.033886467	II	NA	8	914572	R	NA	NA	NA	NA	chr8:914817-915894	N_Shore
cg16176188	-0.295194477	0.073917393	-3.993572618	6.51E-05	-0.44	-0.15	0.032748156	I	Red	2	95787900	R	NA	MRPS5	NM_031902	TSS200	chr2:95787089-95787951	Island
cg16196602	1.16943766	0.2725538	4.290667233	1.78E-05	0.635	1.704	0.024222597	II	NA	11	65819332	F	rs35878859	SF3B2	NM_006842	TSS1500	chr11:65819367-65820224	N_Shore
cg16217313	-0.484082442	0.130062973	-3.721908179	0.000197723	-0.739	-0.229	0.043498886	I	Red	6	107077344	F	rs75903806	RTN4IP1;QRSL1;RTN4IP1	NM_032730;NM_018292;NM_032730	5'UTR;TSS200;1stExon	NA	NA
cg16220124	-0.506048349	0.135878656	-3.724266662	0.000195884	-0.772	-0.24	0.043426453	I	Red	4	13549839	F	NA	LOC285548	NR_015450	TSS1500	chr4:13548570-13549956	Island
cg16247183	-0.483107523	0.11275099	-4.284729766	1.83E-05	-0.704	-0.262	0.024222597	I	Red	1	225865110	F	NA	NA	NA	NA	chr1:225865068-225865328	Island
cg16253629	0.407977317	0.109966285	3.710021826	0.000207241	0.192	0.624	0.044165261	II	NA	4	113776216	F	rs28524727	ANK2	NM_001127493	5'UTR	NA	NA
cg16253663	0.335220285	0.088453312	3.789799121	0.000150769	0.162	0.509	0.040279156	I	Red	4	5990590	R	NA	C4orf50	NM_207405	TSS1500	NA	NA
cg16268707	0.199476964	0.042988309	4.640260813	3.48E-06	0.115	0.284	0.019595269	I	Red	11	66643359	F	NA	PC;PC;PC	NM_000920;NM_022172;NM_001040716	5'UTR;5'UTR;5'UTR	NA	NA
cg16277229	0.253447794	0.064626228	3.921748209	8.79E-05	0.127	0.38	0.034883186	II	NA	6	52268609	R	NA	PAQR8	NM_133367	Body	chr6:52267981-52268199	S_Shore
cg16277776	0.314668736	0.07054853	4.460316006	8.18E-06	0.176	0.453	0.020877178	I	Red	1	1490676	R	NA	SSU72	NM_014188	Body	chr1:1489532-1489794	S_Shore
cg16277835	-0.446968926	0.121999702	-3.663688664	0.000248609	-0.686	-0.208	0.046590992	I	Grn	3	53164425	F	NA	RFT1;RFT1	NM_052859;NM_052859	1stExon;5'UTR	chr3:53164206-53164698	Island
cg16283077	0.193087281	0.047362968	4.076756359	4.57E-05	0.1	0.286	0.030242045	I	Red	11	129306730	F	NA	BARX2	NM_003658	Body	chr11:129306659-129306882	Island
cg16305865	-0.247171589	0.067923666	-3.63896129	0.00027374	-0.38	-0.114	0.047979793	I	Grn	7	752180	F	NA	PRKAR1B;PRKAR1B;PRKAR1B;PRKAR1B;PRKAR1B;PRKAR1B	NM_001164760;NM_001164761;NM_002735;NM_001164762;NM_001164759;NM_001164758	5'UTR;5'UTR;TSS200;5'UTR;5'UTR;5'UTR	chr7:750788-751237	S_Shore
cg16324876	-0.538263482	0.147403938	-3.651622122	0.000260589	-0.827	-0.249	0.047166692	I	Grn	22	36424481	F	NA	RBM9;RBM9;RBM9;RBM9	NM_001082579;NM_001082578;NM_001082578;NM_001082579	5'UTR;1stExon;5'UTR;1stExon	chr22:36424219-36425303	Island
cg16328251	-0.346379825	0.09524973	-3.636543886	0.000276321	-0.533	-0.16	0.048240546	I	Red	11	1770181	F	NA	HCCA2;LOC402778	NM_053005;NM_001170820	Body;TSS1500	chr11:1768979-1770712	Island
cg16339924	0.558369212	0.127814225	4.36859991	1.25E-05	0.308	0.809	0.02323787	II	NA	4	17578868	F	rs10939735	LAP3	NM_015907	TSS200	chr4:17578648-17579539	Island
cg16349277	0.207350495	0.053985163	3.840879329	0.000122594	0.102	0.313	0.038105659	I	Red	4	83323642	F	rs77753610	NA	NA	NA	NA	NA
cg16365729	-0.465977562	0.12424829	-3.750374041	0.000176571	-0.709	-0.222	0.042087917	I	Grn	1	244998894	R	NA	FAM36A;FAM36A	NM_198076;NM_198076	1stExon;5'UTR	chr1:244998023-244999142	Island
cg16375358	0.618861927	0.171419218	3.610224897	0.000305932	0.283	0.955	0.049660139	II	NA	17	64873337	R	NA	CACNG5;CACNG5	NM_145811;NM_014404	TSS200;TSS200	NA	NA
cg16378243	0.546668485	0.129029219	4.236780556	2.27E-05	0.294	0.8	0.025746424	I	Red	10	134550922	F	NA	INPP5A	NM_005539	Body	chr10:134549623-134549876	S_Shore
cg16384355	0.256618424	0.07051395	3.639257542	0.000273425	0.118	0.395	0.047959033	I	Red	7	157320516	F	NA	NA	NA	NA	chr7:157320462-157320669	Island
cg16385478	0.296447988	0.069102666	4.289964552	1.79E-05	0.161	0.432	0.024222597	I	Red	16	3723376	F	NA	TRAP1	NM_016292	Body	chr16:3724344-3724849	N_Shore
cg16399368	0.397649345	0.091039174	4.36789271	1.25E-05	0.219	0.576	0.02323787	I	Red	16	85517462	F	NA	NA	NA	NA	chr16:85519109-85519357	N_Shore
cg16409651	-0.17281367	0.045677619	-3.783333572	0.000154742	-0.262	-0.083	0.040478954	I	Red	16	11680980	F	NA	LITAF;LITAF;LITAF;LITAF	NM_004862;NM_001136473;NR_024320;NM_001136472	TSS1500;TSS200;Body;TSS200	chr16:11680008-11681275	Island
cg16424920	-0.590052276	0.134197008	-4.396910831	1.10E-05	-0.853	-0.327	0.022299932	I	Red	8	9760855	F	NA	LOC157627	NR_024281	TSS200	chr8:9760750-9761643	Island
cg16427321	0.553924621	0.136016458	4.072482331	4.65E-05	0.287	0.821	0.030242045	I	Red	1	10917344	R	NA	NA	NA	NA	NA	NA
cg16436532	1.086789961	0.276638746	3.928552949	8.55E-05	0.545	1.629	0.034883186	I	Red	12	123077350	F	NA	KNTC1	NM_014708	Body	NA	NA
cg16442450	-0.833499527	0.224822787	-3.707362315	0.000209429	-1.274	-0.393	0.044305183	I	Grn	15	69111511	R	NA	ANP32A	NM_006305	Body	chr15:69109708-69114001	Island
cg16444701	0.425815087	0.107236995	3.970785349	7.16E-05	0.216	0.636	0.033120607	I	Grn	10	134790855	R	NA	NA	NA	NA	chr10:134790715-134790938	Island
cg16456337	-0.417824269	0.110773489	-3.77187965	0.000162022	-0.635	-0.201	0.041039272	I	Red	5	112312164	F	NA	DCP2	NM_152624	TSS1500	chr5:112312387-112313006	N_Shore
cg16473125	-0.368321759	0.072615268	-5.072235754	3.93E-07	-0.511	-0.226	0.014683708	I	Red	16	55090720	F	NA	NA	NA	NA	chr16:55090617-55090947	Island
cg16489931	0.142285035	0.038938193	3.65412526	0.00025806	0.066	0.219	0.047018132	I	Red	16	889276	F	NA	NA	NA	NA	NA	NA
cg16503601	-0.220523618	0.05598383	-3.93905916	8.18E-05	-0.33	-0.111	0.034533653	I	Red	16	71929079	R	NA	KIAA0174	NM_014761	TSS1500	chr16:71928861-71929953	Island
cg16503753	-0.666218806	0.1352484	-4.925890487	8.40E-07	-0.931	-0.401	0.016988272	I	Red	14	64319245	F	NA	SYNE2;SYNE2	NM_182914;NM_015180	TSS1500;TSS1500	chr14:64319622-64320526	N_Shore
cg16520225	0.315560065	0.078830176	4.003036414	6.25E-05	0.161	0.47	0.032399883	II	NA	18	72266155	F	NA	LOC400657	NR_024484	TSS1500	chr18:72264517-72265964	S_Shore
cg16543823	0.327264351	0.084843534	3.857269193	0.000114661	0.161	0.494	0.037485912	I	Red	7	52735864	F	rs78211893	NA	NA	NA	NA	NA
cg16544704	0.271967891	0.068732046	3.956929929	7.59E-05	0.137	0.407	0.033698302	I	Red	21	44037277	F	NA	NA	NA	NA	chr21:44037276-44037478	Island
cg16552437	-0.294514899	0.077842751	-3.783459524	0.000154663	-0.447	-0.142	0.040478954	I	Red	5	139554476	R	NA	C5orf32	NM_032412	TSS200	chr5:139554389-139555457	Island
cg16555184	-0.791731512	0.19190764	-4.12558621	3.70E-05	-1.168	-0.416	0.029421726	I	Red	1	149982714	R	NA	OTUD7B	NM_020205	TSS200	chr1:149982153-149982860	Island
cg16572859	-0.323690123	0.078292427	-4.134373327	3.56E-05	-0.477	-0.17	0.02938871	I	Red	19	18263815	F	NA	PIK3R2	NM_005027	TSS200	chr19:18263187-18264641	Island
cg16606347	0.474276402	0.122376633	3.875547063	0.000106385	0.234	0.714	0.036636073	I	Red	10	131749788	R	NA	EBF3	NM_001005463	Body	NA	NA
cg16629158	-0.255994454	0.070856347	-3.612865544	0.000302832	-0.395	-0.117	0.049486529	I	Red	2	122042988	F	NA	TFCP2L1	NM_014553	TSS1500	chr2:122042066-122043093	Island
cg16659583	0.198040478	0.05338241	3.70984517	0.000207386	0.093	0.303	0.044165261	I	Grn	10	1209455	F	rs11593847	NCRNA00200	NR_015376	Body	chr10:1209314-1209521	Island
cg16664859	-0.30258392	0.069211513	-4.371872657	1.23E-05	-0.438	-0.167	0.02323787	I	Grn	1	226309452	R	NA	NA	NA	NA	chr1:226308959-226310476	Island
cg16691251	-0.474231267	0.131030143	-3.619253211	0.000295454	-0.731	-0.217	0.049188294	II	NA	5	66510806	R	NA	NA	NA	NA	NA	NA
cg16704938	0.359804426	0.098194119	3.664215637	0.000248098	0.167	0.552	0.046590992	I	Red	10	121218028	R	NA	NA	NA	NA	NA	NA
cg16719758	0.233426904	0.061530991	3.793647724	0.00014845	0.113	0.354	0.040085681	II	NA	11	133601721	R	NA	NA	NA	NA	NA	NA
cg16725050	-0.42402466	0.113783574	-3.726589374	0.000194088	-0.647	-0.201	0.043408875	I	Red	2	220117771	F	NA	TUBA4B;TUBA4A	NR_003063;NM_006000	TSS200;Body	chr2:220117937-220119334	N_Shore
cg16736685	0.355541852	0.093493833	3.802837459	0.000143048	0.172	0.539	0.039411825	I	Red	19	42584651	R	NA	ZNF574	NM_022752	Body	chr19:42584516-42584755	Island
cg16745616	0.783421424	0.20367347	3.846457879	0.000119838	0.384	1.183	0.037921489	II	NA	19	8428856	F	NA	ANGPTL4;ANGPTL4	NM_001039667;NM_139314	TSS200;TSS200	chr19:8428965-8429492	N_Shore
cg16755598	-0.294346616	0.066158858	-4.449088503	8.62E-06	-0.424	-0.165	0.020877178	I	Red	14	50100815	F	NA	C14orf104;C14orf104	NM_001083908;NM_018139	1stExon;1stExon	chr14:50100315-50102009	Island
cg16756419	-0.880736898	0.199685839	-4.410612709	1.03E-05	-1.272	-0.489	0.021664877	I	Red	11	6704627	R	NA	MRPL17;MRPL17	NM_022061;NM_022061	5'UTR;1stExon	chr11:6704296-6704943	Island
cg16759416	0.182029967	0.050156105	3.629268429	0.000284226	0.084	0.28	0.048713332	I	Red	10	73022276	F	rs7072372	UNC5B	NM_170744	Body	NA	NA
cg16760712	0.331935816	0.080174249	4.140179941	3.47E-05	0.175	0.489	0.029154396	I	Red	2	242616758	F	rs35654709	DTYMK;DTYMK;DTYMK	NM_001165031;NM_012145;NR_033255	Body;Body;Body	chr2:242616820-242617094	N_Shore
cg16774013	0.48852443	0.127269115	3.83851518	0.000123781	0.239	0.738	0.038212771	I	Grn	18	77160150	F	NA	NFATC1;NFATC1;NFATC1;NFATC1;NFATC1	NM_006162;NM_172387;NM_172388;NM_172389;NM_172390	Body;TSS200;5'UTR;TSS200;Body	chr18:77153292-77160759	Island
cg16786661	-0.266951472	0.064991806	-4.107463495	4.00E-05	-0.394	-0.14	0.029421726	I	Red	2	234160315	R	NA	ATG16L1;ATG16L1;ATG16L1;ATG16L1	NM_030803;NM_017974;NM_030803;NM_017974	1stExon;5'UTR;5'UTR;1stExon	chr2:234160100-234160735	Island
cg16791016	0.552203174	0.150614825	3.666326826	0.000246059	0.257	0.847	0.046481088	I	Grn	16	85354618	R	NA	NA	NA	NA	NA	NA
cg16791539	-0.556735827	0.151329921	-3.678954069	0.000234192	-0.853	-0.26	0.045737425	I	Grn	11	3013509	F	NA	NAP1L4;NAP1L4	NM_005969;NM_005969	1stExon;5'UTR	chr11:3012799-3014181	Island
cg16804020	-0.166898528	0.045604251	-3.659714247	0.000252497	-0.256	-0.078	0.046751596	I	Red	10	3827624	F	NA	KLF6;KLF6;KLF6;KLF6	NM_001160124;NR_027653;NM_001300;NM_001160125	TSS200;TSS200;TSS200;TSS200	chr10:3826853-3828126	Island
cg16809304	0.27622697	0.076202852	3.624890205	0.000289084	0.127	0.426	0.04893789	I	Red	8	143784794	F	NA	LY6K;LY6K;LY6K	NM_017527;NM_001160354;NM_001160355	3'UTR;3'UTR;3'UTR	chr8:143781581-143782609	S_Shelf
cg16841189	0.198185322	0.049630089	3.993249399	6.52E-05	0.101	0.295	0.032748156	I	Grn	8	1799411	F	rs7002460	ARHGEF10	NM_014629	Body	chr8:1797406-1798775	S_Shore
cg16851584	0.387767444	0.103696712	3.739438188	0.000184432	0.185	0.591	0.042622298	I	Red	7	4230885	F	NA	SDK1;SDK1	NR_027816;NM_152744	Body;Body	NA	NA
cg16869622	0.458886019	0.116181722	3.949726454	7.82E-05	0.231	0.687	0.033886467	I	Grn	12	133102529	F	NA	FBRSL1	NM_001142641	Body	chr12:133102168-133102604	Island
cg16876876	-0.230116204	0.057202306	-4.022848389	5.75E-05	-0.342	-0.118	0.031685944	I	Red	7	99775179	R	NA	STAG3;GPC2	NM_012447;NM_152742	TSS1500;TSS200	chr7:99774733-99775583	Island
cg16903885	0.631352058	0.170717237	3.698232639	0.000217106	0.297	0.966	0.044835178	I	Red	10	134795548	F	NA	NA	NA	NA	chr10:134791449-134791661	S_Shelf
cg16904399	0.296216402	0.078345277	3.780909482	0.000156256	0.143	0.45	0.040519369	I	Red	10	22902615	F	NA	PIP4K2A	NM_005028	Body	NA	NA
cg16925003	0.276771014	0.075886507	3.647170303	0.000265144	0.128	0.426	0.047554743	I	Grn	2	1684003	F	NA	PXDN	NM_012293	Body	NA	NA
cg16950941	0.328909178	0.067352889	4.883371528	1.04E-06	0.197	0.461	0.018477842	II	NA	11	66035639	R	NA	RAB1B	NM_030981	TSS1500	chr11:66035828-66036808	N_Shore
cg16965475	-0.375185925	0.102253844	-3.669162051	0.000243347	-0.576	-0.175	0.046423493	I	Red	1	52870119	F	rs3806210	ORC1L;ORC1L;PRPF38A	NM_004153;NM_004153;NM_032864	1stExon;5'UTR;TSS200	chr1:52869867-52870305	Island
cg16975985	-0.401617558	0.106122054	-3.784487223	0.000154026	-0.61	-0.194	0.040478954	I	Red	12	49524048	F	NA	TUBA1B	NM_006082	Body	chr12:49524072-49525492	N_Shore
cg16977706	-0.410810017	0.111018986	-3.700358218	0.000215295	-0.628	-0.193	0.044708499	I	Grn	11	2160129	R	NA	INS-IGF2;IGF2;IGF2;IGF2;IGF2	NR_003512;NM_001127598;NM_000612;NM_001007139;NM_000612	Body;Body;5'UTR;5'UTR;1stExon	chr11:2158951-2162484	Island
cg16985259	-0.277253407	0.064648919	-4.288600839	1.80E-05	-0.404	-0.151	0.024222597	I	Red	1	44412491	R	NA	IPO13;IPO13	NM_014652;NM_014652	5'UTR;1stExon	chr1:44412073-44412804	Island
cg16985632	0.359169906	0.085919121	4.180325677	2.91E-05	0.191	0.528	0.028031223	I	Grn	20	30432938	R	NA	FOXS1	NM_004118	1stExon	chr20:30432900-30433242	Island
cg16988008	-0.642887991	0.163060967	-3.942623451	8.06E-05	-0.962	-0.323	0.034384805	I	Red	11	108463728	R	NA	EXPH5	NM_015065	Body	chr11:108463598-108464103	Island
cg17009731	0.18813894	0.051628417	3.64409663	0.000268333	0.087	0.289	0.047777671	I	Red	6	31593008	R	NA	BAT2	NM_080686	Body	chr6:31587779-31589024	S_Shelf
cg17015897	-0.356960518	0.096780831	-3.688339035	0.000225723	-0.547	-0.167	0.045115154	I	Red	1	155293692	F	NA	RUSC1;RUSC1;C1orf104;RUSC1;RUSC1	NM_001105204;NM_014328;NM_001039517;NM_001105205;NM_001105203	Body;TSS1500;5'UTR;TSS200;Body	chr1:155292469-155295433	Island
cg17048356	-0.216425555	0.058121513	-3.7236738	0.000196345	-0.33	-0.103	0.043450484	I	Red	18	43678029	R	NA	ATP5A1;ATP5A1	NM_004046;NM_001001937	Body;Body	chr18:43677956-43678352	Island
cg17050100	0.498118681	0.116266408	4.284287159	1.83E-05	0.27	0.726	0.024222597	II	NA	2	27852231	F	NA	GPN1;CCDC121;GPN1;CCDC121;GPN1;GPN1;CCDC121;GPN1	NM_001145049;NM_001142682;NR_026735;NM_001142683;NM_007266;NM_001145048;NM_024584;NM_001145047	5'UTR;TSS1500;Body;TSS1500;Body;5'UTR;TSS1500;Body	NA	NA
cg17051733	0.54645179	0.139087994	3.9288207	8.54E-05	0.274	0.819	0.034883186	II	NA	3	181429547	R	NA	SOX2OT;SOX2	NR_004053;NM_003106	Body;TSS200	chr3:181430141-181431076	N_Shore
cg17053085	-0.797356399	0.193751005	-4.115366517	3.87E-05	-1.177	-0.418	0.029421726	I	Grn	3	182400230	F	NA	NA	NA	NA	chr3:182400078-182400840	Island
cg17059575	-0.253454409	0.058126239	-4.360412991	1.30E-05	-0.367	-0.14	0.023784078	I	Grn	17	33307583	R	NA	LIG3;LIG3;LIG3;LIG3	NM_002311;NM_013975;NM_013975;NM_002311	5'UTR;5'UTR;1stExon;1stExon	chr17:33307352-33308246	Island
cg17094363	0.346633251	0.087231528	3.973715235	7.08E-05	0.176	0.518	0.03300183	I	Grn	1	1065864	F	NA	NA	NA	NA	NA	NA
cg17144548	0.386547065	0.093871808	4.117818485	3.82E-05	0.203	0.571	0.029421726	II	NA	2	5679308	R	NA	NA	NA	NA	NA	NA
cg17146473	0.219808808	0.059297458	3.706884171	0.000209825	0.104	0.336	0.044369548	I	Red	6	32052428	R	NA	TNXB	NM_019105	Body	chr6:32055067-32055601	N_Shelf
cg17149262	0.262628506	0.06436119	4.080541465	4.49E-05	0.136	0.389	0.030015649	II	NA	8	37186030	F	NA	NA	NA	NA	NA	NA
cg17154057	0.648259478	0.159106826	4.074366213	4.61E-05	0.336	0.96	0.030242045	II	NA	2	42722051	F	NA	KCNG3;KCNG3	NM_133329;NM_172344	TSS1500;TSS1500	chr2:42719784-42722166	Island
cg17154586	-0.445624583	0.117559737	-3.790622484	0.00015027	-0.676	-0.215	0.040263791	I	Red	17	37753185	R	NA	NA	NA	NA	chr17:37752823-37753247	Island
cg17156767	-0.290647672	0.079994827	-3.633330818	0.000279786	-0.447	-0.134	0.048566115	I	Red	19	30364462	R	NA	NA	NA	NA	chr19:30364035-30364803	Island
cg17161088	0.132861825	0.030649331	4.334901228	1.46E-05	0.073	0.193	0.024222597	I	Grn	2	149836984	R	NA	KIF5C	NM_004522	Body	NA	NA
cg17182302	-0.260490266	0.062818159	-4.146735103	3.37E-05	-0.384	-0.137	0.029122839	I	Red	1	116961525	R	NA	C1orf203;C1orf203;C1orf203;C1orf203;C1orf203	NR_027645;NR_024126;NR_024124;NR_027646;NR_024125	TSS1500;TSS1500;TSS1500;TSS1500;TSS1500	chr1:116961182-116961542	Island
cg17193163	-0.343888458	0.082862451	-4.150112079	3.32E-05	-0.506	-0.181	0.028951683	I	Red	11	66056724	R	NA	YIF1A	NM_020470	TSS200	chr11:66056209-66057324	Island
cg17202948	0.248745019	0.064273032	3.870130448	0.000108777	0.123	0.375	0.036807378	I	Red	17	72772736	R	NA	NAT9;TMEM104	NM_015654;NM_017728	TSS1500;5'UTR	chr17:72772244-72772692	S_Shore
cg17215278	0.841461384	0.226264749	3.718923906	0.000200073	0.398	1.285	0.043657524	II	NA	1	117114263	R	NA	CD58;CD58;CD58	NM_001144822;NR_026665;NM_001779	TSS1500;TSS1500;TSS1500	chr1:117112960-117113883	S_Shore
cg17217194	0.245841008	0.067487806	3.642747066	0.000269744	0.114	0.378	0.047831951	I	Red	4	3870523	F	rs71595717	NA	NA	NA	chr4:3873092-3874011	N_Shelf
cg17217195	0.369951141	0.091542574	4.041301497	5.32E-05	0.191	0.549	0.031105128	I	Grn	1	3673328	F	NA	CCDC27	NM_152492	Body	NA	NA
cg17223748	0.809350578	0.176957953	4.573688636	4.79E-06	0.463	1.156	0.019595269	I	Red	11	1960093	R	NA	NA	NA	NA	chr11:1958934-1959247	S_Shore
cg17240275	0.193480974	0.05011451	3.860777572	0.000113027	0.095	0.292	0.03735502	I	Red	15	75500943	R	NA	C15orf39	NM_015492	Body	chr15:75500858-75501157	Island
cg17256532	0.524127782	0.134897893	3.885366702	0.000102176	0.26	0.789	0.036342456	I	Grn	10	118031950	R	NA	GFRA1;GFRA1;GFRA1	NM_005264;NM_001145453;NM_145793	5'UTR;5'UTR;TSS200	chr10:118030732-118034230	Island
cg17281365	0.747531649	0.203091741	3.680758487	0.000232541	0.349	1.146	0.045645875	II	NA	2	45871073	F	NA	NA	NA	NA	chr2:45870696-45871051	S_Shore
cg17284531	-0.397588972	0.10776505	-3.689405537	0.000224779	-0.609	-0.186	0.045113145	I	Red	19	6773074	R	NA	VAV1	NM_005428	Body	NA	NA
cg17285883	0.712762978	0.181302752	3.931341203	8.45E-05	0.357	1.068	0.034796783	II	NA	1	17896290	R	NA	ARHGEF10L	NM_018125	5'UTR	NA	NA
cg17303459	-0.193083069	0.05116706	-3.773581488	0.000160921	-0.293	-0.093	0.040883775	I	Red	19	54606023	F	NA	NDUFA3	NM_004542	TSS200	chr19:54605985-54606590	Island
cg17319142	0.168045788	0.044870646	3.745116343	0.00018031	0.08	0.256	0.042393413	I	Red	2	119916581	F	rs7600045	C1QL2	NM_182528	TSS200	chr2:119914126-119916663	Island
cg17322163	-0.188462064	0.044349529	-4.249471551	2.14E-05	-0.275	-0.102	0.025436012	I	Red	12	51632344	F	NA	DAZAP2;DAZAP2;DAZAP2;DAZAP2;DAZAP2;DAZAP2	NM_014764;NM_001136266;NM_001136268;NM_001136264;NM_001136267;NM_001136269	TSS200;TSS200;TSS200;TSS200;TSS200;TSS200	chr12:51632489-51633162	N_Shore
cg17324588	0.252891369	0.066376439	3.809956876	0.000138991	0.123	0.383	0.039051976	I	Red	14	106743777	R	NA	NA	NA	NA	chr14:106743602-106743837	Island
cg17376730	-0.707487284	0.165460362	-4.275871721	1.90E-05	-1.032	-0.383	0.024380182	I	Red	19	2096346	F	NA	C19orf36;C19orf36;MOBKL2A	NM_001039846;NM_001031735;NM_130807	TSS1500;TSS1500;TSS200	chr19:2096043-2097491	Island
cg17376960	-0.56662659	0.140513978	-4.032528296	5.52E-05	-0.842	-0.291	0.031333961	I	Red	17	7197987	F	NA	YBX2	NM_015982	TSS200	chr17:7197431-7198417	Island
cg17377690	-0.204873875	0.046318829	-4.423122925	9.73E-06	-0.296	-0.114	0.021276	I	Red	8	59572467	F	rs13270855	NSMAF;NSMAF	NM_001144772;NM_003580	TSS1500;TSS200	chr8:59571603-59572526	Island
cg17381847	-0.339526321	0.091286536	-3.719347195	0.000199738	-0.518	-0.161	0.043643015	II	NA	5	162864271	R	NA	CCNG1;CCNG1	NM_199246;NM_004060	TSS1500;TSS1500	chr5:162864384-162865007	N_Shore
cg17382310	0.230359093	0.05771734	3.991159236	6.58E-05	0.117	0.343	0.032754148	I	Grn	7	135413101	F	NA	SLC13A4	NM_012450	TSS200	NA	NA
cg17383727	0.45667234	0.12656482	3.608209146	0.000308318	0.209	0.705	0.049880721	II	NA	5	37835701	F	NA	GDNF;GDNF;GDNF	NM_199234;NM_000514;NM_199231	TSS1500;5'UTR;TSS200	chr5:37836747-37840726	N_Shore
cg17389150	0.383465949	0.103795478	3.694437895	0.000220374	0.18	0.587	0.044955503	I	Grn	19	2997638	F	NA	TLE2;TLE2;TLE2	NM_003260;NM_001144762;NM_001144761	3'UTR;3'UTR;3'UTR	NA	NA
cg17397836	0.824427803	0.213008812	3.870392948	0.00010866	0.407	1.242	0.036807378	II	NA	15	93607234	F	NA	RGMA;RGMA;RGMA;RGMA;RGMA;RGMA	NM_001166289;NM_001166288;NM_020211;NM_001166286;NM_001166283;NM_001166287	Body;Body;Body;Body;Body;Body	chr15:93609145-93609741	N_Shore
cg17401635	-0.612748549	0.164862185	-3.716731944	0.000201816	-0.936	-0.29	0.043821229	I	Red	5	176944162	R	NA	DDX41	NM_016222	TSS200	chr5:176943525-176944508	Island
cg17423711	0.460726595	0.111947477	4.115560335	3.86E-05	0.241	0.68	0.029421726	II	NA	1	167190178	F	NA	POU2F1;POU2F1	NM_002697;NM_002697	1stExon;5'UTR	chr1:167189130-167191361	Island
cg17436476	0.327053265	0.083288346	3.926759011	8.61E-05	0.164	0.49	0.034883186	I	Grn	1	62120002	F	NA	NA	NA	NA	chr1:62119874-62120093	Island
cg17450733	-0.43378071	0.111493051	-3.890652418	1.00E-04	-0.652	-0.215	0.036061114	II	NA	12	45443875	F	NA	DBX2	NM_001004329	Body	chr12:45444202-45445386	N_Shore
cg17451471	-0.236138832	0.063144166	-3.739677732	0.000184256	-0.36	-0.112	0.042622298	I	Red	1	109969188	R	NA	PSMA5	NM_002790	TSS200	chr1:109968648-109969570	Island
cg17469019	0.269489266	0.072224134	3.73129109	0.000190501	0.128	0.411	0.04310596	II	NA	1	117452517	R	NA	PTGFRN	NM_020440	TSS200	chr1:117452203-117453452	Island
cg17478893	0.424733052	0.116347824	3.650545744	0.000261684	0.197	0.653	0.047253788	I	Red	8	1431021	F	rs11774603	NA	NA	NA	chr8:1430752-1431324	Island
cg17487170	-0.417406797	0.114628308	-3.641393675	0.000271166	-0.642	-0.193	0.047874328	I	Red	5	133451259	F	NA	TCF7;TCF7;TCF7;TCF7;TCF7;TCF7;TCF7	NM_201632;NM_001134852;NM_001134851;NM_201633;NM_003202;NM_213648;NM_201634	TSS200;TSS1500;TSS1500;TSS200;Body;TSS200;TSS200	chr5:133449320-133451260	Island
cg17495092	-0.363509364	0.100311884	-3.623791623	0.000290316	-0.56	-0.167	0.049016605	I	Red	1	39456765	F	NA	AKIRIN1;AKIRIN1	NM_024595;NM_001136275	TSS200;TSS200	chr1:39456655-39457271	Island
cg17515155	-0.276708402	0.074994686	-3.689706783	0.000224513	-0.424	-0.13	0.045113145	I	Red	1	11714790	R	NA	FBXO2;FBXO44;FBXO44;FBXO44;FBXO44	NM_012168;NM_183413;NM_001014765;NM_033182;NM_183412	TSS200;TSS200;TSS200;TSS200;5'UTR	chr1:11714217-11715304	Island
cg17515347	0.206262379	0.054845631	3.760780481	0.000169384	0.099	0.314	0.041598872	II	NA	1	159047163	R	NA	AIM2	NM_004833	TSS1500	NA	NA
cg17519650	-0.176751346	0.048012174	-3.681385988	0.00023197	-0.271	-0.083	0.045596754	I	Grn	2	63277830	F	rs58235267	OTX1	NM_014562	TSS200	chr2:63274475-63279430	Island
cg17528967	0.31663825	0.083497485	3.79218907	0.000149325	0.153	0.48	0.040188001	II	NA	17	42032747	F	NA	PYY	NM_004160	5'UTR	chr17:42030173-42030941	S_Shore
cg17580614	0.537846413	0.137510389	3.911314755	9.18E-05	0.268	0.807	0.035278179	II	NA	17	15849512	F	NA	ADORA2B	NM_000676	Body	chr17:15847757-15849513	Island
cg17584014	0.728856732	0.166720956	4.371716356	1.23E-05	0.402	1.056	0.02323787	II	NA	3	129722676	R	NA	NA	NA	NA	chr3:129721368-129722131	S_Shore
cg17596905	0.713218504	0.176566602	4.039373787	5.36E-05	0.367	1.059	0.031107885	II	NA	3	191046949	R	NA	CCDC50;CCDC50;CCDC50;CCDC50;UTS2D	NM_174908;NM_178335;NM_178335;NM_174908;NM_198152	5'UTR;1stExon;5'UTR;1stExon;5'UTR	chr3:191046948-191047710	Island
cg17606675	0.559823902	0.142729345	3.922276125	8.77E-05	0.28	0.84	0.034883186	II	NA	1	144615272	R	NA	NBPF9	NM_001037675	Body	NA	NA
cg17623882	0.315262813	0.085100401	3.704598456	0.000211726	0.148	0.482	0.044547509	I	Red	6	41773611	R	NA	USP49	NM_018561	Body	chr6:41773954-41774420	N_Shore
cg17636806	0.597575555	0.163515902	3.654540908	0.000257643	0.277	0.918	0.047012824	I	Red	6	33143731	R	NA	COL11A2;COL11A2;COL11A2	NM_080679;NM_080681;NM_080680	Body;Body;Body	NA	NA
cg17640879	0.262804049	0.070824882	3.710617559	0.000206754	0.124	0.402	0.044165261	I	Red	11	75115376	F	NA	RPS3;SNORD15B	NM_001005;NR_000025	Body;TSS200	NA	NA
cg17642201	0.348401852	0.091722275	3.79844319	0.000145608	0.169	0.528	0.039757015	I	Red	6	159549216	R	NA	NA	NA	NA	chr6:159550082-159550382	N_Shore
cg17643757	0.41717845	0.110770875	3.76613845	0.000165792	0.2	0.634	0.041363796	I	Grn	12	6993812	F	NA	NA	NA	NA	NA	NA
cg17651164	0.325357871	0.08201943	3.966838949	7.28E-05	0.165	0.486	0.033206221	I	Grn	2	236283273	R	NA	NA	NA	NA	NA	NA
cg17668981	0.080720524	0.021043456	3.835896645	0.000125107	0.039	0.122	0.038298208	II	NA	5	138617804	F	NA	MATR3	NM_199189	5'UTR	NA	NA
cg17669700	-0.384824391	0.101361142	-3.796567253	0.000146714	-0.583	-0.186	0.039906594	I	Grn	19	1384167	R	NA	NDUFS7	NM_024407	Body	chr19:1383437-1384251	Island
cg17740743	0.300674818	0.072419798	4.151831754	3.30E-05	0.159	0.443	0.028922362	I	Red	1	1986220	F	rs76138702	PRKCZ	NM_002744	Body	chr1:1981251-1983212	S_Shelf
cg17741192	0.342085051	0.089617676	3.817160459	0.000134996	0.166	0.518	0.038947178	I	Red	19	2811654	F	NA	THOP1	NM_003249	Body	chr19:2811638-2811868	Island
cg17742359	0.690961296	0.182916394	3.777470575	0.000158429	0.332	1.049	0.040699256	II	NA	1	6312102	R	NA	GPR153	NM_207370	Body	chr1:6313761-6314139	N_Shore
cg17748167	-0.466623513	0.129158937	-3.612785319	0.000302925	-0.72	-0.213	0.049486529	I	Grn	1	31769917	R	NA	ZCCHC17;ZCCHC17;SNRNP40	NM_016505;NM_016505;NM_004814	5'UTR;1stExon;TSS1500	chr1:31769246-31769978	Island
cg17768665	0.082955179	0.019330834	4.291339951	1.78E-05	0.045	0.121	0.024222597	II	NA	8	95221197	F	NA	CDH17;CDH17	NM_004063;NM_001144663	TSS1500;5'UTR	NA	NA
cg17772793	0.239306149	0.056215322	4.256955923	2.07E-05	0.129	0.349	0.024860112	I	Red	6	168901202	R	NA	SMOC2;SMOC2	NM_022138;NM_001166412	Body;Body	NA	NA
cg17778441	-0.233606948	0.063629934	-3.671337291	0.000241285	-0.358	-0.109	0.04626643	I	Red	19	37960107	F	NA	ZNF570;ZNF570	NM_144694;NM_144694	5'UTR;1stExon	chr19:37959852-37960615	Island
cg17783671	-0.232296587	0.058404843	-3.977351409	6.97E-05	-0.347	-0.118	0.032909116	I	Grn	19	59070436	R	NA	UBE2M;LOC100131691	NM_003969;NR_027334	TSS200;TSS200	chr19:59070085-59071100	Island
cg17787710	0.915565562	0.223814047	4.090742183	4.30E-05	0.477	1.354	0.029738988	II	NA	17	79989039	R	NA	RAC3	NM_005052	TSS1500	chr17:79987983-79990315	Island
cg17797121	0.703436216	0.187109087	3.759497873	0.000170255	0.337	1.07	0.041684676	I	Grn	10	99330133	R	NA	UBTD1	NM_024954	Body	chr10:99329960-99330204	Island
cg17803054	-0.30668194	0.083715972	-3.66336234	0.000248926	-0.471	-0.143	0.046590992	I	Grn	19	40927068	F	NA	NA	NA	NA	chr19:40926640-40927368	Island
cg17816495	-0.328879095	0.090673095	-3.627085787	0.000286638	-0.507	-0.151	0.048744738	I	Red	19	19030203	F	NA	DDX49;COPE;COPE;COPE	NM_019070;NM_199444;NM_199442;NM_007263	TSS1500;TSS200;TSS200;TSS200	chr19:19029924-19030653	Island
cg17819896	0.357963223	0.094155898	3.801814124	0.00014364	0.173	0.543	0.039489906	I	Red	19	4688966	R	NA	DPP9	NM_139159	Body	chr19:4688708-4689000	Island
cg17822779	0.650525162	0.176862862	3.678133189	0.000234947	0.304	0.997	0.045829538	II	NA	8	135174326	F	rs77516344	NA	NA	NA	NA	NA
cg17838705	-0.238864572	0.055455542	-4.307316484	1.65E-05	-0.348	-0.13	0.024222597	I	Red	1	112298602	R	NA	DDX20;C1orf183	NM_007204;NM_198926	1stExon;TSS200	chr1:112298041-112298992	Island
cg17839324	0.469738599	0.129817185	3.61846238	0.000296359	0.215	0.724	0.049188294	I	Grn	1	3123500	F	NA	PRDM16;PRDM16	NM_022114;NM_199454	Body;Body	NA	NA
cg17840061	-0.185984597	0.046996803	-3.95738825	7.58E-05	-0.278	-0.094	0.033698302	I	Red	6	70577478	R	NA	COL19A1	NM_001858	5'UTR	chr6:70576974-70577572	Island
cg17847861	0.147608002	0.038976027	3.787148442	0.000152386	0.071	0.224	0.040320458	I	Grn	19	40972683	R	NA	SPTBN4;BLVRB	NM_020971;NM_000713	TSS1500;TSS1500	chr19:40971476-40973393	Island
cg17859048	-0.200596689	0.052185315	-3.843929852	0.00012108	-0.303	-0.098	0.037921489	I	Red	1	151170906	F	NA	PIP5K1A;PIP5K1A;PIP5K1A;PIP5K1A	NM_003557;NM_001135638;NM_001135636;NM_001135637	TSS200;TSS200;TSS200;TSS200	chr1:151170847-151171532	Island
cg17861618	0.453932435	0.110740364	4.099069378	4.15E-05	0.237	0.671	0.029421726	I	Red	10	134930343	F	NA	GPR123	NM_001083909	Body	chr10:134925815-134926878	S_Shelf
cg17904367	0.698059083	0.186400807	3.744935955	0.00018044	0.333	1.063	0.042393413	II	NA	19	14555234	R	NA	PKN1;PKN1	NM_002741;NM_213560	Body;Body	chr19:14551998-14552255	S_Shelf
cg17913670	0.438130729	0.099408745	4.407366078	1.05E-05	0.243	0.633	0.021773311	I	Grn	7	158809584	R	NA	LOC154822	NR_024394	Body	NA	NA
cg17922329	0.380144941	0.089180172	4.262662136	2.02E-05	0.205	0.555	0.024642275	I	Red	19	35646039	F	NA	FXYD5;FXYD5;FXYD5;FXYD5	NM_014164;NM_144779;NR_028406;NM_001164605	5'UTR;5'UTR;Body;5'UTR	chr19:35645597-35646047	Island
cg17926792	0.42948621	0.109662765	3.916426971	8.99E-05	0.215	0.644	0.035165173	I	Grn	15	28326914	R	NA	OCA2	NM_000275	Body	NA	NA
cg17940849	0.622521942	0.149431396	4.165938085	3.10E-05	0.33	0.915	0.028404729	I	Red	1	3193280	R	NA	PRDM16;PRDM16	NM_022114;NM_199454	Body;Body	chr1:3195376-3196052	N_Shelf
cg17967577	-0.341786276	0.094250711	-3.626352223	0.000287453	-0.527	-0.157	0.048794813	I	Red	13	88324711	F	NA	SLITRK5	NM_015567	TSS200	chr13:88326600-88326919	N_Shore
cg17973038	0.476734521	0.124547978	3.82771787	0.000129337	0.233	0.721	0.038626384	I	Red	8	99395068	R	NA	NA	NA	NA	NA	NA
cg17973565	-0.271321501	0.072576011	-3.738446049	0.000185161	-0.414	-0.129	0.042666347	I	Red	1	153606594	R	NA	C1orf77;S100A13;C1orf77	NM_015607;NM_001024210;NM_015607	5'UTR;TSS200;1stExon	chr1:153606177-153606974	Island
cg18003189	-0.743750386	0.182890242	-4.066648825	4.77E-05	-1.102	-0.385	0.030242045	I	Red	10	30723096	R	NA	MAP3K8;MAP3K8	NM_005204;NM_005204	1stExon;5'UTR	chr10:30722378-30723707	Island
cg18019280	0.582240462	0.159863384	3.642112698	0.00027041	0.269	0.896	0.047837573	II	NA	22	23860693	F	NA	NA	NA	NA	chr22:23863760-23864379	N_Shelf
cg18040436	0.19009375	0.047095487	4.036347489	5.43E-05	0.098	0.282	0.031119651	II	NA	1	9189312	F	rs13375923	GPR157	NM_024980	TSS200	chr1:9188503-9189743	Island
cg18040892	0.290951379	0.068886222	4.223651261	2.40E-05	0.156	0.426	0.025998984	I	Grn	19	11144017	F	NA	SMARCA4;SMARCA4;SMARCA4;SMARCA4;SMARCA4;SMARCA4;SMARCA4	NM_001128846;NM_001128848;NM_001128844;NM_003072;NM_001128847;NM_001128849;NM_001128845	Body;Body;Body;Body;Body;Body;Body	chr19:11143975-11144249	Island
cg18052984	-0.518579534	0.134218839	-3.863686622	0.000111688	-0.782	-0.256	0.03718532	I	Red	12	51158439	R	NA	ATF1	NM_005171	5'UTR	chr12:51157498-51158842	Island
cg18064852	-0.329292634	0.088909307	-3.703691396	0.000212485	-0.504	-0.155	0.044588933	I	Red	5	36690457	R	NA	NA	NA	NA	chr5:36690207-36690658	Island
cg18085807	-0.22517571	0.057376539	-3.924525862	8.69E-05	-0.338	-0.113	0.034883186	I	Red	6	30313188	R	rs17354619	RPP21	NM_024839	Body	chr6:30312837-30313419	Island
cg18098774	0.394824268	0.093765125	4.210779541	2.54E-05	0.211	0.579	0.026628973	I	Red	2	107084802	F	rs9751480	RGPD3	NM_001144013	TSS200	chr2:107082328-107084936	Island
cg18102337	0.465980541	0.124431555	3.744874357	0.000180484	0.222	0.71	0.042393413	II	NA	6	32064810	F	NA	TNXB	NM_019105	Body	chr6:32063533-32065044	Island
cg18117228	-0.223635999	0.048210399	-4.638750218	3.51E-06	-0.318	-0.129	0.019595269	I	Red	1	65775772	R	NA	DNAJC6	NM_014787	Body	chr1:65775018-65775746	S_Shore
cg18119504	0.261145423	0.057264563	4.560332075	5.11E-06	0.149	0.373	0.019595269	I	Grn	19	1918133	F	NA	SCAMP4	NM_079834	Body	chr19:1918075-1918305	Island
cg18120576	0.358906663	0.095130668	3.772775619	0.000161441	0.172	0.545	0.04097322	I	Red	10	47098712	F	NA	NA	NA	NA	NA	NA
cg18129961	0.317114377	0.08596967	3.688677372	0.000225423	0.149	0.486	0.045113145	I	Grn	14	96730780	R	rs2229459	BDKRB1	NM_000710	Body	NA	NA
cg18137779	0.092164773	0.024491608	3.763116391	0.000167809	0.044	0.14	0.041504487	II	NA	1	56163457	R	NA	NA	NA	NA	NA	NA
cg18144906	-0.226979559	0.061902483	-3.666727853	0.000245674	-0.348	-0.106	0.046481088	I	Grn	4	42154934	F	NA	BEND4;BEND4	NM_207406;NM_001159547	TSS200;TSS200	chr4:42152766-42154984	Island
cg18148375	0.473711277	0.12900529	3.672029874	0.000240632	0.221	0.727	0.046206445	I	Red	2	1926535	R	NA	MYT1L	NM_015025	Body	NA	NA
cg18185116	0.167357962	0.045783284	3.655438161	0.000256743	0.078	0.257	0.046956361	I	Red	7	598729	F	rs9330360	PRKAR1B;PRKAR1B;PRKAR1B;PRKAR1B;PRKAR1B;PRKAR1B	NM_001164759;NM_001164762;NM_001164758;NM_001164760;NM_001164761;NM_002735	Body;Body;Body;Body;Body;Body	chr7:599089-599327	N_Shore
cg18194353	-0.834579612	0.219888939	-3.795459735	0.00014737	-1.266	-0.404	0.039914714	I	Grn	1	100315666	R	NA	AGL;AGL;AGL;AGL;AGL;AGL	NM_000644;NM_000643;NM_000642;NM_000642;NM_000646;NM_000028	TSS1500;TSS1500;5'UTR;1stExon;TSS1500;TSS1500	chr1:100315420-100316009	Island
cg18194483	0.400060551	0.102866666	3.889117505	0.000100609	0.198	0.602	0.03612949	I	Red	1	44064515	F	NA	PTPRF;PTPRF	NM_002840;NM_130440	Body;Body	chr1:44063469-44063757	S_Shore
cg18213653	0.518059679	0.142910365	3.625067214	0.000288886	0.238	0.798	0.04893789	I	Red	12	112605734	R	NA	C12orf51	NM_001109662	Body	NA	NA
cg18247436	-0.922189454	0.214476182	-4.299728973	1.71E-05	-1.343	-0.502	0.024222597	I	Grn	11	120856646	F	NA	GRIK4	NM_014619	Body	chr11:120856725-120857174	N_Shore
cg18259400	-0.457557547	0.108996384	-4.197914913	2.69E-05	-0.671	-0.244	0.027277603	I	Red	14	102780962	R	NA	NA	NA	NA	chr14:102780626-102780830	S_Shore
cg18263559	0.424077725	0.117113688	3.621077372	0.000293379	0.195	0.654	0.049092143	I	Red	22	22315643	R	NA	TOP3B	NM_003935	Body	chr22:22311564-22311819	S_Shelf
cg18283321	0.807941059	0.195245186	4.138084405	3.50E-05	0.425	1.191	0.029215605	I	Red	7	50629542	R	NA	DDC;DDC	NM_001082971;NM_000790	5'UTR;TSS1500	NA	NA
cg18286498	0.576971426	0.127161476	4.537313061	5.70E-06	0.328	0.826	0.020026345	I	Red	5	1922911	R	NA	NA	NA	NA	NA	NA
cg18313106	-0.252471351	0.068189766	-3.702481575	0.000213501	-0.386	-0.119	0.044588933	I	Red	1	229694614	F	NA	ABCB10	NM_012089	TSS200	chr1:229693772-229695074	Island
cg18317439	0.449838718	0.120856982	3.722074716	0.000197593	0.213	0.687	0.043498886	II	NA	17	643637	R	NA	FAM57A	NM_024792	Body	NA	NA
cg18319029	-0.499843188	0.116951387	-4.273939808	1.92E-05	-0.729	-0.271	0.024382492	I	Red	18	904920	F	NA	ADCYAP1;ADCYAP1	NM_001117;NM_001099733	TSS1500;TSS200	chr18:904578-909574	Island
cg18338391	-0.34454396	0.088252675	-3.904062506	9.46E-05	-0.518	-0.172	0.035550511	I	Grn	6	111303184	R	NA	RPF2	NM_032194	TSS200	chr6:111303114-111303485	Island
cg18342253	-0.745816168	0.187104659	-3.986090846	6.72E-05	-1.113	-0.379	0.032776111	I	Red	1	201476371	R	NA	CSRP1;CSRP1;CSRP1;CSRP1	NM_004078;NM_001144773;NM_004078;NM_001144773	5'UTR;1stExon;1stExon;5'UTR	chr1:201475885-201476516	Island
cg18346402	-0.254263683	0.06393983	-3.976608699	6.99E-05	-0.38	-0.129	0.032909116	II	NA	2	233412831	R	rs4973539	TIGD1	NM_145702	1stExon	chr2:233415005-233415811	N_Shelf
cg18368265	0.253925749	0.063522145	3.997436661	6.40E-05	0.129	0.378	0.032587381	II	NA	5	123968247	F	NA	NA	NA	NA	NA	NA
cg18415444	0.241755676	0.06012081	4.021164654	5.79E-05	0.124	0.36	0.031685944	I	Red	3	32932484	R	NA	TRIM71	NM_001039111	Body	NA	NA
cg18418651	-0.77895985	0.192850905	-4.039181728	5.36E-05	-1.157	-0.401	0.031107885	I	Red	17	39891230	F	NA	HAP1;HAP1;HAP1	NM_001079870;NM_001079871;NM_177977	TSS1500;TSS1500;TSS1500	chr17:39889956-39891489	Island
cg18444589	0.380442381	0.079379829	4.792683309	1.65E-06	0.225	0.536	0.018650808	I	Red	14	101521608	F	NA	MIR485;MIR453;MIR668	NR_030160;NR_029969;NR_030408	TSS200;TSS1500;Body	NA	NA
cg18447950	0.216611882	0.05769731	3.754280409	0.00017384	0.104	0.33	0.041926963	I	Red	17	79073781	F	NA	BAIAP2;BAIAP2;BAIAP2;BAIAP2	NM_017450;NM_006340;NM_001144888;NM_017451	Body;Body;Body;Body	chr17:79077317-79077518	N_Shelf
cg18449879	0.34436131	0.093373845	3.687984665	0.000226037	0.161	0.527	0.045124921	II	NA	19	16045054	R	NA	CYP4F11;CYP4F11	NM_021187;NM_001128932	1stExon;Body	NA	NA
cg18455731	0.327751923	0.079386045	4.128583602	3.65E-05	0.172	0.483	0.029421726	I	Grn	2	3215537	R	NA	TSSC1	NM_003310	Body	NA	NA
cg18457159	0.222806626	0.060043506	3.710753109	0.000206644	0.105	0.34	0.044165261	I	Red	17	73489129	R	NA	KIAA0195	NM_014738	Body	NA	NA
cg18459189	-0.421019121	0.115004819	-3.66088244	0.000251348	-0.646	-0.196	0.046649341	I	Red	15	35261784	R	NA	AQR	NM_014691	1stExon	chr15:35261686-35262124	Island
cg18469292	0.482068704	0.124372307	3.876013206	0.000106182	0.238	0.726	0.036636073	II	NA	22	49699707	F	NA	NA	NA	NA	chr22:49697533-49697816	S_Shore
cg18487508	-0.567114746	0.15370553	-3.689618349	0.000224591	-0.868	-0.266	0.045113145	I	Grn	19	39926862	R	NA	RPS16	NM_001020	TSS1500	chr19:39926224-39926863	Island
cg18487598	0.354026577	0.091064047	3.887665752	0.000101213	0.176	0.533	0.036185613	I	Red	5	178735372	R	rs34812500	ADAMTS2;ADAMTS2	NM_021599;NM_014244	Body;Body	NA	NA
cg18496140	0.38951848	0.099904006	3.898927541	9.66E-05	0.194	0.585	0.035664673	I	Red	11	44286375	R	NA	ALX4	NM_021926	3'UTR	NA	NA
cg18502522	-0.496254622	0.129714614	-3.82574181	0.000130379	-0.75	-0.242	0.038626384	I	Grn	15	75165624	R	NA	SCAMP2;SCAMP2	NM_005697;NM_005697	5'UTR;1stExon	chr15:75165373-75165903	Island
cg18516317	-0.421627563	0.109862707	-3.837767828	0.000124158	-0.637	-0.206	0.038212771	I	Red	2	54950679	F	NA	EML6	NM_001039753	TSS1500	chr2:54950394-54952488	Island
cg18527197	0.437952172	0.101481829	4.3155723	1.59E-05	0.239	0.637	0.024222597	I	Red	7	710340	F	rs34547684	PRKAR1B;PRKAR1B;PRKAR1B;PRKAR1B;PRKAR1B;PRKAR1B	NM_001164759;NM_001164762;NM_001164758;NM_001164760;NM_001164761;NM_002735	Body;Body;Body;Body;Body;Body	chr7:710146-710630	Island
cg18538297	-1.148075854	0.297077908	-3.86456153	0.000111289	-1.73	-0.566	0.037135473	I	Grn	19	58892579	R	NA	ZNF837;ZNF837	NM_001129730;NM_138466	TSS200;TSS200	chr19:58891834-58892641	Island
cg18540325	0.454744493	0.114946748	3.956131857	7.62E-05	0.229	0.68	0.033698302	II	NA	9	33795118	R	NA	PRSS3;PRSS3	NM_002771;NM_007343	TSS1500;Body	NA	NA
cg18545655	0.173656899	0.046467096	3.737201471	0.00018608	0.083	0.265	0.042744266	I	Red	13	46288165	R	NA	SPERT	NM_152719	Body	chr13:46287282-46288214	Island
cg18550498	0.338269087	0.091504458	3.696749803	0.000218377	0.159	0.518	0.04490423	I	Red	11	1008985	F	NA	AP2A2	NM_012305	Body	chr11:1009403-1009649	N_Shore
cg18557131	-0.340694643	0.080470452	-4.233785643	2.30E-05	-0.498	-0.183	0.025746424	I	Red	13	100624207	F	NA	ZIC5	NM_033132	TSS200	chr13:100620241-100624348	Island
cg18604419	0.453523476	0.095058473	4.77099473	1.83E-06	0.267	0.64	0.0186624	I	Red	14	101513037	F	NA	MIR889;MIR539	NR_030595;NR_030256	TSS1500;TSS1500	NA	NA
cg18607580	0.33507947	0.082141108	4.079315207	4.52E-05	0.174	0.496	0.030015649	I	Red	10	13542696	R	NA	BEND7;BEND7	NM_001100912;NM_152751	5'UTR;5'UTR	NA	NA
cg18624636	-0.582549589	0.131221768	-4.439427976	9.02E-06	-0.84	-0.325	0.020877178	I	Red	10	91295358	F	NA	SLC16A12	NM_213606	TSS200	chr10:91294947-91295925	Island
cg18643176	-0.184688305	0.049132171	-3.759009609	0.000170587	-0.281	-0.088	0.041719339	I	Red	6	31633795	F	rs28986180	CSNK2B;BAT4;CSNK2B	NM_001320;NM_033177;NM_001320	1stExon;TSS1500;5'UTR	chr6:31632815-31634093	Island
cg18645032	0.079227038	0.019544646	4.053643998	5.04E-05	0.041	0.118	0.030488664	II	NA	2	37426595	R	NA	NA	NA	NA	chr2:37423578-37424361	S_Shelf
cg18645133	-0.618948195	0.169013764	-3.662117105	0.000250139	-0.95	-0.288	0.046590992	I	Grn	15	89914961	R	NA	NA	NA	NA	chr15:89914363-89915061	Island
cg18663499	-0.497983596	0.109068687	-4.565779688	4.98E-06	-0.712	-0.284	0.019595269	I	Grn	3	118959852	F	NA	B4GALT4;B4GALT4	NM_003778;NM_212543	TSS200;TSS200	chr3:118959339-118959934	Island
cg18681998	0.21430043	0.047074774	4.552341101	5.31E-06	0.122	0.307	0.019813456	II	NA	4	17616180	F	rs2286773	MED28	NM_025205	TSS200	chr4:17616175-17616506	Island
cg18688230	-0.411759419	0.112990319	-3.644200868	0.000268224	-0.633	-0.19	0.047777671	I	Red	12	89747628	F	NA	DUSP6;DUSP6	NM_001946;NM_022652	TSS1500;TSS1500	chr12:89745168-89748144	Island
cg18696321	0.298494529	0.075210152	3.968806365	7.22E-05	0.151	0.446	0.033182459	I	Red	15	97307874	F	rs77151048	NA	NA	NA	NA	NA
cg18703502	-0.37614765	0.102054154	-3.685765206	0.000228016	-0.576	-0.176	0.045267646	II	NA	3	149185238	R	NA	NA	NA	NA	NA	NA
cg18703511	0.244501204	0.064131375	3.81250525	0.000137565	0.119	0.37	0.038960227	II	NA	5	141086558	F	rs4912768	NA	NA	NA	chr5:141082245-141082592	S_Shelf
cg18709545	0.180109774	0.044281721	4.067361652	4.75E-05	0.093	0.267	0.030242045	II	NA	10	118892892	R	NA	VAX1;VAX1	NM_001112704;NM_199131	3'UTR;Body	chr10:118893527-118894432	N_Shore
cg18727102	0.447292906	0.100261673	4.461255148	8.15E-06	0.251	0.644	0.020877178	II	NA	6	166298493	R	NA	NA	NA	NA	NA	NA
cg18739800	-0.406416158	0.109156669	-3.723237087	0.000196685	-0.62	-0.192	0.043453777	I	Red	6	27806020	F	NA	HIST1H2BN;HIST1H2AK	NM_003520;NM_003510	TSS1500;1stExon	chr6:27805843-27806853	Island
cg18740429	0.206181351	0.055030438	3.746678323	0.000179192	0.098	0.314	0.042326491	I	Red	10	134844716	F	NA	NA	NA	NA	chr10:134844442-134844934	Island
cg18743959	0.178701325	0.048126752	3.713139067	0.000204704	0.084	0.273	0.044165261	II	NA	3	98623320	F	NA	NA	NA	NA	chr3:98620131-98620910	S_Shelf
cg18787245	0.717650686	0.173370082	4.139414829	3.48E-05	0.378	1.057	0.029197202	II	NA	1	41872995	R	NA	NA	NA	NA	NA	NA
cg18788524	-0.232873589	0.056669207	-4.109349698	3.97E-05	-0.344	-0.122	0.029421726	I	Red	1	145096602	F	NA	SEC22B	NM_004892	1stExon	chr1:145096393-145096784	Island
cg18790814	0.24522011	0.064204891	3.8193369	0.000133811	0.119	0.371	0.038832516	I	Red	12	123237467	R	NA	DENR;DENR	NM_003677;NM_003677	1stExon;5'UTR	chr12:123236994-123237664	Island
cg18805027	0.273737051	0.068496067	3.996390816	6.43E-05	0.139	0.408	0.032655163	I	Grn	14	105103075	F	NA	NA	NA	NA	chr14:105103493-105103769	N_Shore
cg18818563	-0.253086151	0.06342415	-3.990375103	6.60E-05	-0.377	-0.129	0.032754148	I	Grn	19	9546128	R	NA	ZNF266;ZNF266;ZNF266;ZNF266	NM_198058;NM_006631;NM_198058;NM_006631	1stExon;5'UTR;5'UTR;1stExon	chr19:9545783-9546302	Island
cg18845375	0.370654683	0.102034853	3.632628185	0.000280549	0.171	0.571	0.048642645	I	Grn	2	237173852	R	NA	ASB18	NM_212556	TSS1500	NA	NA
cg18851521	-0.250496642	0.058162835	-4.306816264	1.66E-05	-0.364	-0.136	0.024222597	I	Red	18	268131	R	NA	THOC1	NM_005131	TSS200	chr18:267710-268382	Island
cg18869061	0.16559839	0.043151062	3.837643454	0.000124221	0.081	0.25	0.038212771	I	Red	15	100272053	F	NA	LYSMD4	NM_152449	Body	chr15:100272901-100273891	N_Shore
cg18876494	-0.318237142	0.082620487	-3.851794567	0.000117255	-0.48	-0.156	0.037634396	I	Red	12	69004196	F	NA	RAP1B;RAP1B	NM_015646;NM_001010942	TSS1500;TSS1500	chr12:69004220-69005377	N_Shore
cg18879590	-0.242009922	0.066780205	-3.623976937	0.000290107	-0.373	-0.111	0.049008582	I	Grn	1	236306640	F	NA	GPR137B	NM_003272	Body	chr1:236305534-236306674	Island
cg18907582	-0.179049496	0.04822324	-3.712929598	0.000204874	-0.274	-0.085	0.044165261	I	Red	14	62229059	R	NA	SNAPC1	NM_003082	TSS200	chr14:62228974-62229268	Island
cg18909596	0.220851027	0.053787375	4.106001188	4.03E-05	0.115	0.326	0.029421726	I	Red	8	140744326	R	NA	TRAPPC9;TRAPPC9	NM_001160372;NM_031466	Body;Body	chr8:140744199-140744498	Island
cg18955698	0.30244905	0.083056073	3.641504341	0.00027105	0.14	0.465	0.047871157	II	NA	17	43025023	F	NA	KIF18B;KIF18B	NM_001080443;NM_001080443	1stExon;5'UTR	chr17:43024658-43025344	Island
cg18970754	-0.380657167	0.097289578	-3.912620185	9.13E-05	-0.571	-0.19	0.035180382	I	Red	14	74079533	R	NA	NA	NA	NA	chr14:74079183-74079657	Island
cg19001845	0.417627951	0.109345579	3.819340056	0.000133809	0.203	0.632	0.038832516	II	NA	4	190597946	F	rs62331392	NA	NA	NA	NA	NA
cg19003626	0.348183743	0.084772944	4.107250819	4.00E-05	0.182	0.514	0.029421726	I	Red	14	104640199	R	NA	KIF26A	NM_015656	Body	chr14:104640469-104640689	N_Shore
cg19015611	0.29589208	0.07193991	4.113044886	3.90E-05	0.155	0.437	0.029421726	II	NA	2	71126446	F	NA	VAX2	NM_012476	TSS1500	chr2:71126720-71129209	N_Shore
cg19025525	-0.619570615	0.164642957	-3.76311642	0.000167809	-0.942	-0.297	0.041504487	I	Red	1	228566824	F	rs4439356	NA	NA	NA	chr1:228565949-228567121	Island
cg19025573	0.724531838	0.182282205	3.974780958	7.04E-05	0.367	1.082	0.03294454	II	NA	22	25615481	R	NA	CRYBB2	NM_000496	TSS200	NA	NA
cg19025786	0.201838665	0.050169736	4.023115946	5.74E-05	0.104	0.3	0.031685944	I	Red	1	2206662	R	NA	SKI	NM_003036	Body	NA	NA
cg19026959	-0.699046725	0.180530198	-3.872187208	0.000107863	-1.053	-0.345	0.036737788	I	Red	19	13049204	F	NA	CALR	NM_004343	TSS1500	chr19:13049038-13049809	Island
cg19056515	0.209197496	0.053241241	3.929237814	8.52E-05	0.105	0.314	0.034883186	I	Red	10	105361785	R	NA	SH3PXD2A	NM_014631	Body	chr10:105361784-105362188	Island
cg19062966	0.462002837	0.116961345	3.950047229	7.81E-05	0.233	0.691	0.033886467	II	NA	18	32924746	R	NA	ZNF24	NM_006965	TSS1500	chr18:32923915-32924585	S_Shore
cg19064601	0.34833249	0.079090045	4.404252037	1.06E-05	0.193	0.503	0.021773311	I	Red	11	68142605	R	NA	LRP5	NM_002335	Body	NA	NA
cg19065773	0.472617119	0.117033653	4.038300999	5.38E-05	0.243	0.702	0.031107885	I	Red	10	98469552	R	NA	PIK3AP1	NM_152309	Body	NA	NA
cg19084053	0.137529613	0.033540914	4.100353808	4.13E-05	0.072	0.203	0.029421726	II	NA	4	189548707	R	rs6834400	NA	NA	NA	chr4:189552385-189552791	N_Shelf
cg19096048	0.645485762	0.151087139	4.272274703	1.93E-05	0.349	0.942	0.024382492	I	Grn	10	1585223	R	NA	ADARB2	NM_018702	Body	chr10:1585174-1585421	Island
cg19099234	-0.21993452	0.052370884	-4.199557133	2.67E-05	-0.323	-0.117	0.027220993	I	Red	5	137911120	R	NA	HSPA9	NM_004134	TSS200	chr5:137910848-137911637	Island
cg19130180	0.087829613	0.021899397	4.010595063	6.06E-05	0.045	0.131	0.032349334	II	NA	12	81232149	R	NA	LIN7A	NM_004664	Body	NA	NA
cg19132762	-0.249571894	0.066657293	-3.744104869	0.000181038	-0.38	-0.119	0.042427165	I	Red	3	37034739	F	rs35032294	EPM2AIP1;MLH1;MLH1;MLH1;MLH1;EPM2AIP1	NM_014805;NM_001167618;NM_001167617;NM_001167619;NM_000249;NM_014805	5'UTR;TSS1500;TSS1500;TSS1500;TSS200;1stExon	chr3:37034228-37035356	Island
cg19142035	0.902877159	0.207801521	4.344901586	1.39E-05	0.496	1.31	0.024222597	II	NA	4	9533205	F	rs2001394	NA	NA	NA	chr4:9533766-9534520	N_Shore
cg19145138	0.411325237	0.090789153	4.530554856	5.88E-06	0.233	0.589	0.020026345	II	NA	4	177120416	R	NA	NA	NA	NA	chr4:177116543-177116893	S_Shelf
cg19160754	0.500945463	0.134206005	3.732660561	0.000189468	0.238	0.764	0.043041248	I	Red	1	27647887	R	NA	TMEM222	NM_032125	TSS1500	chr1:27648453-27649006	N_Shore
cg19177744	0.324828645	0.082307145	3.946542493	7.93E-05	0.164	0.486	0.03421796	I	Red	2	8711042	F	NA	NA	NA	NA	NA	NA
cg19189310	-0.880829203	0.241526809	-3.646921039	0.000265401	-1.354	-0.407	0.047561268	I	Red	6	34393779	F	NA	RPS10	NM_001014	5'UTR	chr6:34393325-34394014	Island
cg19189864	0.161913987	0.044393362	3.647256684	0.000265055	0.075	0.249	0.047554743	II	NA	10	105372137	F	NA	SH3PXD2A	NM_014631	Body	NA	NA
cg19196414	0.62152492	0.172279662	3.607651142	0.000308982	0.284	0.959	0.049924093	II	NA	17	27188595	R	NA	MIR451;MIR144	NR_029970;NR_029685	TSS200;Body	NA	NA
cg19235339	-0.526905191	0.128397472	-4.10370378	4.07E-05	-0.779	-0.275	0.029421726	I	Grn	10	90342899	F	NA	RNLS;RNLS	NM_001031709;NM_018363	1stExon;1stExon	chr10:90342528-90343221	Island
cg19250764	-0.35411368	0.091256881	-3.880405248	0.000104283	-0.533	-0.175	0.036545011	I	Red	7	66461952	R	NA	TYW1;SBDS;TYW1	NM_018264;NM_016038;NM_018264	1stExon;TSS1500;5'UTR	chr7:66461857-66462107	Island
cg19260885	-0.178258974	0.046323244	-3.848153925	0.000119011	-0.269	-0.087	0.037897612	I	Red	1	113162159	F	rs35979114	ST7L;CAPZA1;ST7L;ST7L;CAPZA1;ST7L	NM_138727;NM_006135;NM_138728;NM_138729;NM_006135;NM_017744	TSS200;1stExon;TSS200;TSS200;5'UTR;TSS200	chr1:113161591-113162571	Island
cg19262631	0.377795806	0.099841242	3.783965409	0.000154349	0.182	0.573	0.040478954	I	Grn	19	19231829	F	NA	TMEM161A	NM_017814	Body	chr19:19231786-19232021	Island
cg19276540	0.270283417	0.074485291	3.628681743	0.000284872	0.124	0.416	0.048713332	I	Red	17	44060353	F	rs3744459	MAPT;MAPT;MAPT;MAPT;MAPT;MAPT	NM_016835;NM_001123067;NM_016834;NM_005910;NM_001123066;NM_016841	Body;Body;Body;Body;Body;Body	chr17:44060246-44060530	Island
cg19286986	-0.715056122	0.192587993	-3.712880074	0.000204914	-1.093	-0.338	0.044165261	I	Grn	12	6931017	R	NA	GPR162;GPR162;GPR162;GPR162	NM_014449;NM_014449;NM_019858;NM_019858	5'UTR;1stExon;1stExon;5'UTR	chr12:6933276-6933605	N_Shelf
cg19302970	-0.344994365	0.086945968	-3.967916768	7.25E-05	-0.515	-0.175	0.033182459	I	Grn	18	9102753	R	NA	NDUFV2	NM_021074	1stExon	chr18:9102416-9102973	Island
cg19324023	0.771346616	0.171470289	4.498427209	6.85E-06	0.435	1.107	0.020594892	II	NA	22	51170003	F	NA	SHANK3	NM_001080420	3'UTR	chr22:51169027-51170019	Island
cg19344263	-0.398547998	0.107814324	-3.69661455	0.000218494	-0.61	-0.187	0.04490423	I	Red	19	58919951	F	NA	ZNF584	NM_173548	TSS200	chr19:58919548-58920529	Island
cg19364635	0.794699411	0.212110461	3.746629972	0.000179226	0.379	1.21	0.042326491	II	NA	2	38978654	F	rs35816636	SFRS7	NM_001031684	TSS200	chr2:38977535-38978684	Island
cg19377230	0.358419877	0.089087027	4.023255557	5.74E-05	0.184	0.533	0.031685944	I	Red	2	241295512	F	NA	NA	NA	NA	chr2:241293841-241294408	S_Shore
cg19398112	0.234291994	0.058629915	3.996116913	6.44E-05	0.119	0.349	0.032655163	I	Red	19	14529923	F	NA	DDX39	NM_005804	5'UTR	chr19:14529731-14530505	Island
cg19416326	0.359566093	0.096387995	3.730403293	0.000191174	0.171	0.548	0.043136352	I	Red	5	175955353	F	NA	RNF44	NM_014901	3'UTR	NA	NA
cg19421371	0.309256297	0.083588558	3.699744378	0.000215817	0.145	0.473	0.04475934	I	Red	19	45211155	F	NA	CEACAM16	NM_001039213	Body	chr19:45211114-45211328	Island
cg19441646	0.452694727	0.112758451	4.014729924	5.95E-05	0.232	0.674	0.03206475	II	NA	14	102695456	R	NA	RAGE	NM_014226	3'UTR	chr14:102695455-102695804	Island
cg19451261	0.447310871	0.120776274	3.703631986	0.000212535	0.211	0.684	0.044588933	I	Grn	10	103002111	F	NA	NA	NA	NA	NA	NA
cg19452060	-0.609859988	0.163709051	-3.725267394	0.000195108	-0.931	-0.289	0.043426453	I	Grn	12	57914632	R	NA	DDIT3	NM_004083	TSS1500	chr12:57914385-57914820	Island
cg19478558	0.272728193	0.067807551	4.022091783	5.77E-05	0.14	0.406	0.031685944	I	Red	18	44260048	R	NA	ST8SIA5	NM_013305	Body	chr18:44259905-44260451	Island
cg19484381	-0.240025285	0.056398411	-4.255887405	2.08E-05	-0.351	-0.129	0.024900007	I	Red	6	28890673	F	NA	TRIM27	NM_006510	Body	chr6:28890951-28892013	N_Shore
cg19487745	0.474515484	0.129529401	3.663380508	0.000248908	0.221	0.728	0.046590992	I	Grn	10	45567697	F	NA	NA	NA	NA	NA	NA
cg19497548	-0.216514395	0.048738312	-4.442385972	8.90E-06	-0.312	-0.121	0.020877178	I	Red	1	26249349	R	NA	NA	NA	NA	chr1:26249205-26249613	Island
cg19504301	0.274789968	0.061977427	4.433710513	9.26E-06	0.153	0.396	0.021086552	II	NA	5	145562268	F	rs13186701	LARS;LARS	NM_020117;NM_020117	5'UTR;1stExon	NA	NA
cg19524350	-0.23678442	0.064660399	-3.661969654	0.000250284	-0.364	-0.11	0.046590992	I	Grn	12	52431177	R	NA	NA	NA	NA	chr12:52430519-52431598	Island
cg19557518	-0.263169859	0.070016461	-3.758685515	0.000170808	-0.4	-0.126	0.041719339	I	Red	17	60704641	F	NA	MRC2	NM_006039	TSS200	chr17:60704542-60705943	Island
cg19571715	0.346987067	0.095259365	3.642550702	0.00026995	0.16	0.534	0.047837573	I	Grn	15	28202759	F	rs61751032	OCA2	NM_000275	Body	NA	NA
cg19586661	-0.33837521	0.085366924	-3.963774214	7.38E-05	-0.506	-0.171	0.033313339	I	Red	11	66079705	R	NA	NA	NA	NA	chr11:66079092-66080920	Island
cg19595107	-0.169964563	0.045752953	-3.714832636	0.000203338	-0.26	-0.08	0.04406837	II	NA	5	140734543	F	NA	PCDHGA2;PCDHGA4;PCDHGA1;PCDHGA4;PCDHGB1;PCDHGA3	NM_018915;NM_032053;NM_018912;NM_018917;NM_018922;NM_018916	Body;TSS1500;Body;TSS1500;Body;Body	chr5:140734720-140735028	N_Shore
cg19599202	-0.191514764	0.049883535	-3.839238014	0.000123417	-0.289	-0.094	0.038212771	I	Grn	12	121124787	F	NA	MLEC	NM_014730	TSS200	chr12:121124111-121125479	Island
cg19613930	0.382397851	0.104380929	3.663483872	0.000248808	0.178	0.587	0.046590992	II	NA	12	56513362	R	NA	ZC3H10	NM_032786	5'UTR	chr12:56511861-56512409	S_Shore
cg19656577	-0.391704663	0.091561602	-4.278045106	1.89E-05	-0.571	-0.212	0.024380182	I	Red	12	3600229	R	NA	PRMT8	NM_019854	TSS200	chr12:3599966-3603008	Island
cg19683457	-0.569633212	0.156096408	-3.649239711	0.000263018	-0.876	-0.264	0.047400963	I	Red	6	105307726	F	NA	HACE1;HACE1	NM_020771;NM_020771	5'UTR;1stExon	chr6:105307119-105307916	Island
cg19683962	-0.235837686	0.056862629	-4.147498811	3.36E-05	-0.347	-0.124	0.029089803	I	Red	4	108852534	F	rs1493128	CYP2U1	NM_183075	TSS200	chr4:108852495-108853387	Island
cg19694099	0.358558925	0.093324234	3.842077345	0.000121997	0.176	0.541	0.038040146	I	Red	11	65562214	R	NA	OVOL1	NM_004561	Body	NA	NA
cg19699250	-0.257775961	0.06712278	-3.840364823	0.000122852	-0.389	-0.126	0.038161183	I	Red	11	124746323	F	NA	ROBO3	NM_022370	Body	chr11:124745909-124746773	Island
cg19706803	0.311823726	0.083595815	3.730135613	0.000191377	0.148	0.476	0.043136352	I	Red	1	3126033	R	NA	PRDM16;PRDM16	NM_022114;NM_199454	Body;Body	NA	NA
cg19711839	-0.401325251	0.099466879	-4.034762698	5.47E-05	-0.596	-0.206	0.031154115	I	Red	3	127842684	R	NA	RUVBL1	NM_003707	TSS200	chr3:127842318-127842907	Island
cg19726536	0.351661892	0.09709774	3.621730975	0.000292638	0.161	0.542	0.049092143	I	Red	5	179225537	F	NA	MIR1229;MGAT4B;MGAT4B	NR_031598;NM_014275;NM_054013	TSS200;Body;Body	chr5:179222608-179223825	S_Shore
cg19743686	0.527453577	0.133180694	3.960435724	7.48E-05	0.266	0.788	0.033551092	II	NA	6	2637301	F	rs13216076	NA	NA	NA	chr6:2634372-2634945	S_Shelf
cg19755886	0.400075043	0.082969999	4.821924161	1.42E-06	0.237	0.563	0.018650808	I	Red	2	11953281	F	rs75120308	LPIN1	NM_145693	Body	NA	NA
cg19763461	0.286159719	0.069335309	4.127186004	3.67E-05	0.15	0.422	0.029421726	II	NA	2	63284557	F	NA	NA	NA	NA	chr2:63285949-63287097	N_Shore
cg19778776	-0.320304008	0.08781706	-3.647400706	0.000264907	-0.492	-0.148	0.047554743	II	NA	1	206807380	R	NA	DYRK3;DYRK3	NM_001004023;NM_003582	TSS1500;TSS1500	chr1:206808523-206809187	N_Shore
cg19790972	0.579520613	0.151419948	3.827240865	0.000129588	0.283	0.876	0.038626384	II	NA	5	2187004	F	rs73734640	NA	NA	NA	NA	NA
cg19808620	0.33412754	0.086868491	3.846360578	0.000119885	0.164	0.504	0.037921489	I	Red	1	153514442	F	NA	S100A5	NM_002962	TSS1500	NA	NA
cg19822716	0.25499349	0.07022007	3.631347715	0.000281945	0.117	0.393	0.048642645	I	Red	19	1154276	R	NA	SBNO2	NM_014963	5'UTR	chr19:1154023-1154486	Island
cg19826439	-0.206217268	0.053617915	-3.846051585	0.000120037	-0.311	-0.101	0.037921489	I	Red	1	226297528	F	NA	NA	NA	NA	chr1:226297287-226298586	Island
cg19830626	0.231272099	0.060669923	3.811972835	0.000137862	0.112	0.35	0.038960227	I	Red	14	105908540	F	rs74092358	MTA1	NM_004689	Body	chr14:105911709-105912069	N_Shelf
cg19855366	-0.283402159	0.077668117	-3.648886707	0.000263379	-0.436	-0.131	0.047428282	I	Red	13	111267979	R	NA	CARKD	NM_018210	TSS200	chr13:111267780-111268778	Island
cg19858890	0.311807498	0.077752642	4.010249542	6.07E-05	0.159	0.464	0.032349334	II	NA	17	62743877	R	NA	NA	NA	NA	NA	NA
cg19864416	-0.638148639	0.160321796	-3.98042346	6.88E-05	-0.952	-0.324	0.032844427	I	Red	19	42498173	F	NA	ATP1A3	NM_152296	Body	chr19:42497819-42498560	Island
cg19871361	0.227617602	0.062728351	3.628624047	0.000284936	0.105	0.351	0.048713332	I	Grn	10	11505280	F	NA	USP6NL;USP6NL	NM_001080491;NM_014688	Body;Body	chr10:11505222-11505766	Island
cg19871694	0.69294361	0.190248173	3.642314135	0.000270198	0.32	1.066	0.047837573	I	Red	22	50728170	R	NA	PLXNB2	NM_012401	Body	chr22:50727441-50728654	Island
cg19902697	-0.299627997	0.0736792	-4.066656464	4.77E-05	-0.444	-0.155	0.030242045	I	Red	11	76494208	R	NA	TSKU	NM_015516	TSS200	chr11:76494416-76495672	N_Shore
cg19907257	0.362217471	0.092765649	3.904650856	9.44E-05	0.18	0.544	0.035550511	I	Grn	1	161450473	F	NA	NA	NA	NA	NA	NA
cg19928739	0.353611903	0.097765038	3.616956654	0.000298087	0.162	0.545	0.049291232	I	Red	1	2089555	F	NA	PRKCZ;PRKCZ;PRKCZ	NM_001033581;NM_001033582;NM_002744	Body;Body;Body	NA	NA
cg19949853	0.589720188	0.147854335	3.988521464	6.65E-05	0.3	0.88	0.032754148	I	Grn	22	49150845	F	NA	NA	NA	NA	chr22:49145736-49147208	S_Shelf
cg19951269	0.211289137	0.048944438	4.316918267	1.58E-05	0.115	0.307	0.024222597	I	Red	11	94783903	R	NA	NA	NA	NA	NA	NA
cg19979314	0.558333977	0.15034389	3.713712456	0.000204241	0.264	0.853	0.044150215	I	Grn	15	22991163	R	NA	CYFIP1;CYFIP1	NM_014608;NM_001033028	Body;Body	NA	NA
cg19990785	-0.405913389	0.104810861	-3.872818017	0.000107584	-0.611	-0.2	0.036737788	I	Red	11	67232403	F	NA	TMEM134;TMEM134;TMEM134	NM_025124;NM_001078651;NM_001078650	Body;Body;Body	chr11:67232298-67232558	Island
cg19998654	-0.230717378	0.061798069	-3.733407539	0.000188907	-0.352	-0.11	0.042998782	I	Red	2	37458983	R	NA	CEBPZ;C2orf56;C2orf56	NM_005760;NM_144736;NM_001083946	TSS1500;Body;Body	chr2:37458398-37459199	Island
cg20002901	0.305424538	0.07705536	3.963702675	7.38E-05	0.154	0.456	0.033313339	I	Grn	2	238777656	F	NA	RAMP1	NM_005855	Body	NA	NA
cg20034209	-0.296007219	0.074364867	-3.980471312	6.88E-05	-0.442	-0.15	0.032844427	I	Red	17	66287369	R	NA	ARSG;SLC16A6;SLC16A6	NM_014960;NM_004694;NM_004694	5'UTR;5'UTR;1stExon	chr17:66286541-66288532	Island
cg20034983	-0.145773373	0.039481314	-3.692211757	0.000222312	-0.223	-0.068	0.045061793	I	Red	14	73525089	F	rs17570658	RBM25	NM_021239	TSS200	chr14:73524989-73525752	Island
cg20044918	0.51875019	0.111454442	4.654369821	3.25E-06	0.3	0.737	0.019595269	I	Red	10	134908622	R	NA	GPR123	NM_001083909	Body	chr10:134911976-134912483	N_Shelf
cg20049005	0.385049568	0.101318113	3.800402099	0.000144461	0.186	0.584	0.039603133	II	NA	11	2025906	R	NA	NA	NA	NA	chr11:2026733-2027016	N_Shore
cg20074569	-0.735304747	0.174033786	-4.225068962	2.39E-05	-1.076	-0.394	0.025998984	I	Grn	22	42372516	F	NA	SEPT3;SEPT3	NM_145733;NM_019106	TSS1500;TSS1500	chr22:42372483-42373299	Island
cg20094279	0.763344416	0.207640569	3.676277809	0.000236662	0.356	1.17	0.045912367	I	Red	12	132856142	R	NA	GALNT9;LOC100130238	NM_001122636;NR_024563	Body;Body	chr12:132853943-132854190	S_Shore
cg20143758	0.677756287	0.172119694	3.937703286	8.23E-05	0.34	1.015	0.034580741	II	NA	6	167530343	R	NA	CCR6	NM_004367	5'UTR	NA	NA
cg20144981	-0.314578525	0.081155995	-3.876220417	0.000106092	-0.474	-0.156	0.036634949	II	NA	11	27527687	R	NA	BDNFOS;LIN7C	NR_002832;NM_018362	TSS1500;Body	chr11:27527863-27528517	N_Shore
cg20149956	-0.328989042	0.088854017	-3.702579291	0.000213419	-0.503	-0.155	0.044588933	I	Red	1	249132233	R	NA	ZNF672	NM_024836	TSS1500	chr1:249132080-249133310	Island
cg20152152	0.274588799	0.065082514	4.219087142	2.45E-05	0.147	0.402	0.026175967	I	Grn	11	67219241	R	NA	GPR152	NM_206997	1stExon	NA	NA
cg20160996	0.497286177	0.119295091	4.168538478	3.07E-05	0.263	0.731	0.028319524	I	Grn	11	63990575	R	NA	FERMT3;FERMT3	NM_031471;NM_178443	Body;Body	chr11:63993589-63993834	N_Shelf
cg20168849	0.30168015	0.083169341	3.627299982	0.0002864	0.139	0.465	0.048721398	II	NA	3	188995030	R	NA	TPRG1	NM_198485	Body	NA	NA
cg20174277	-0.157495047	0.043468717	-3.623181395	0.000291002	-0.243	-0.072	0.049016605	I	Red	10	49864417	R	NA	NA	NA	NA	chr10:49863620-49864601	Island
cg20200742	0.413663925	0.112293038	3.683789587	0.000229792	0.194	0.634	0.045423006	I	Grn	21	45843863	R	NA	TRPM2	NM_003307	Body	chr21:45844992-45845693	N_Shore
cg20206129	-0.26641662	0.073059146	-3.646588217	0.000265745	-0.41	-0.123	0.047561268	I	Grn	6	150185809	F	NA	LRP11	NM_032832	TSS1500	chr6:150184344-150185505	S_Shore
cg20216928	0.253582074	0.06505123	3.898190308	9.69E-05	0.126	0.381	0.035673258	I	Red	10	134735508	R	NA	NA	NA	NA	chr10:134735972-134736254	N_Shore
cg20227886	-0.176805196	0.048954331	-3.611635448	0.000304272	-0.273	-0.081	0.049602872	I	Red	18	48405353	F	NA	ME2;ME2	NM_002396;NM_001168335	TSS200;TSS200	chr18:48405135-48405983	Island
cg20237707	-0.352712184	0.085833972	-4.109237563	3.97E-05	-0.521	-0.184	0.029421726	I	Red	13	111719772	R	NA	NA	NA	NA	chr13:111719704-111720014	Island
cg20253172	0.206386745	0.052200058	3.953764638	7.69E-05	0.104	0.309	0.033814795	I	Red	1	3107290	F	NA	PRDM16;PRDM16	NM_022114;NM_199454	Body;Body	chr1:3102540-3103352	S_Shelf
cg20306180	0.426523209	0.096869682	4.403061939	1.07E-05	0.237	0.616	0.021773311	II	NA	22	32340197	R	NA	C22orf24;YWHAH	NM_015372;NM_003405	5'UTR;TSS1500	chr22:32339933-32341192	Island
cg20314660	-0.428743518	0.112127054	-3.82372945	0.000131448	-0.649	-0.209	0.038688508	I	Grn	19	14530105	F	NA	DDX39;DDX39	NM_005804;NM_005804	5'UTR;1stExon	chr19:14529731-14530505	Island
cg20319142	0.57602871	0.159417527	3.613333621	0.000302285	0.264	0.888	0.049486529	I	Red	13	113974009	F	NA	LAMP1	NM_005561	Body	chr13:113975893-113976139	N_Shore
cg20349076	-0.306722879	0.083748735	-3.662418076	0.000249846	-0.471	-0.143	0.046590992	I	Red	11	118992192	F	NA	HINFP;HINFP	NM_015517;NM_198971	TSS200;TSS200	chr11:118991886-118992751	Island
cg20376421	-0.260500022	0.064740175	-4.023776918	5.73E-05	-0.387	-0.134	0.031685944	I	Red	12	56546193	F	NA	MYL6B	NM_002475	TSS200	chr12:56546192-56546411	Island
cg20382344	0.202642186	0.05470391	3.704345546	0.000211937	0.095	0.31	0.044563903	I	Red	1	204587945	R	NA	LRRN2;LRRN2	NM_006338;NM_201630	Body;Body	NA	NA
cg20388707	0.327662618	0.087772976	3.7330695	0.00018916	0.156	0.5	0.043015067	I	Grn	2	233749442	R	NA	NGEF;NGEF	NM_019850;NM_001114090	Body;Body	NA	NA
cg20388916	0.585564182	0.158007196	3.705933629	0.000210613	0.276	0.895	0.044483246	II	NA	3	133682290	F	NA	SLCO2A1	NM_005630	Body	NA	NA
cg20395646	0.322009718	0.071810905	4.484133957	7.32E-06	0.181	0.463	0.020802234	I	Red	12	121947433	R	NA	KDM2B;KDM2B	NM_032590;NM_001005366	Body;Body	NA	NA
cg20400171	0.272617108	0.068892664	3.957128263	7.59E-05	0.138	0.408	0.033698302	I	Red	10	126303604	F	NA	NA	NA	NA	chr10:126303794-126304213	N_Shore
cg20402747	0.218499058	0.053548462	4.080398418	4.50E-05	0.114	0.323	0.030015649	I	Grn	17	77954963	R	NA	TBC1D16	NM_019020	Body	chr17:77955491-77955693	N_Shore
cg20419291	0.483753246	0.126842155	3.813820771	0.000136835	0.235	0.732	0.038960227	II	NA	11	124767974	F	NA	ROBO4	NM_019055	TSS200	NA	NA
cg20442941	-0.315262038	0.085145207	-3.702639877	0.000213368	-0.482	-0.148	0.044588933	II	NA	20	3644300	F	NA	GFRA4;GFRA4	NM_145762;NM_022139	TSS1500;TSS1500	chr20:3641130-3642114	S_Shelf
cg20444381	-0.83971636	0.231821199	-3.622258724	0.000292042	-1.294	-0.385	0.049062216	II	NA	8	109456000	F	rs75121144	TTC35	NM_014673	Body	chr8:109455600-109456263	Island
cg20454520	-0.240864455	0.062855084	-3.832060033	0.000127075	-0.364	-0.118	0.038416128	I	Red	14	24584429	F	NA	DCAF11;DCAF11;DCAF11;DCAF11;DCAF11;DCAF11	NM_001163484;NM_025230;NM_181357;NR_028099;NR_028100;NM_025230	5'UTR;5'UTR;TSS200;Body;TSS200;1stExon	chr14:24583268-24584243	S_Shore
cg20461403	-0.226419736	0.04928292	-4.594284128	4.34E-06	-0.323	-0.13	0.019595269	I	Grn	5	179285952	F	NA	C5orf45;C5orf45	NM_001017987;NM_016175	TSS200;TSS200	chr5:179285250-179286416	Island
cg20478261	0.396056339	0.09944483	3.982673997	6.81E-05	0.201	0.591	0.032844427	I	Red	17	79017421	F	NA	BAIAP2;BAIAP2;BAIAP2;BAIAP2	NM_017450;NM_006340;NM_001144888;NM_017451	Body;Body;Body;Body	NA	NA
cg20491991	-0.253331017	0.059972131	-4.224145681	2.40E-05	-0.371	-0.136	0.025998984	I	Grn	1	167683013	F	NA	NA	NA	NA	chr1:167683477-167683917	N_Shore
cg20492401	0.623956898	0.158985717	3.924609755	8.69E-05	0.312	0.936	0.034883186	II	NA	17	73452580	F	NA	KIAA0195	NM_014738	TSS200	chr17:73452534-73452898	Island
cg20509085	0.718755588	0.178481908	4.027050109	5.65E-05	0.369	1.069	0.031685944	II	NA	4	153859296	R	NA	NA	NA	NA	chr4:153857112-153859245	S_Shore
cg20526205	-0.497734129	0.137085909	-3.630819049	0.000282523	-0.766	-0.229	0.048658536	I	Red	7	96339258	R	NA	SHFM1	NM_006304	TSS200	chr7:96338816-96339277	Island
cg20553016	0.341495647	0.084048817	4.063063123	4.84E-05	0.177	0.506	0.030242045	I	Red	2	235950085	R	NA	SH3BP4	NM_014521	Body	chr2:235951452-235951814	N_Shore
cg20575761	-0.705715832	0.15833393	-4.457135822	8.31E-06	-1.016	-0.395	0.020877178	I	Red	14	57275166	F	NA	OTX2	NM_021728	5'UTR	chr14:57274607-57276840	Island
cg20630683	-0.569268837	0.143815023	-3.958340537	7.55E-05	-0.851	-0.287	0.033698302	I	Red	6	32812637	R	NA	PSMB8;PSMB8;PSMB8	NM_004159;NM_148919;NM_004159	5'UTR;TSS1500;1stExon	chr6:32811494-32811839	S_Shore
cg20633203	0.486956911	0.132728424	3.668821617	0.000243671	0.227	0.747	0.04645914	I	Red	8	8239143	F	NA	PRAGMIN	NM_001080826	1stExon	NA	NA
cg20639802	-0.430550209	0.112964108	-3.811389457	0.000138188	-0.652	-0.209	0.038987826	I	Red	8	26371558	F	NA	PNMA2	NM_007257	TSS200	chr8:26371172-26372830	Island
cg20673919	0.55951601	0.144458731	3.873189296	0.00010742	0.276	0.843	0.036737788	II	NA	11	125702313	R	NA	PATE4	NM_001144874	TSS1500	NA	NA
cg20679573	-0.182106486	0.045372321	-4.013603038	5.98E-05	-0.271	-0.093	0.032116233	II	NA	1	52345196	F	NA	NRD1;NRD1	NM_002525;NM_001101662	TSS1500;TSS1500	chr1:52344178-52344939	S_Shore
cg20699157	0.12263792	0.032153255	3.814168078	0.000136642	0.06	0.186	0.038960227	I	Red	13	24528151	F	rs2765114	NA	NA	NA	NA	NA
cg20713639	-0.248744301	0.067844113	-3.666409504	0.00024598	-0.382	-0.116	0.046481088	I	Grn	11	65185684	F	NA	NA	NA	NA	chr11:65189463-65190295	N_Shelf
cg20718643	-0.302361357	0.078840617	-3.835096269	0.000125515	-0.457	-0.148	0.038321768	I	Red	2	20646775	R	NA	RHOB	NM_004040	TSS200	chr2:20646428-20647988	Island
cg20736321	0.452025623	0.113363652	3.987394666	6.68E-05	0.23	0.674	0.032754148	I	Red	11	1029162	R	NA	MUC6	NM_005961	Body	chr11:1029083-1029390	Island
cg20755651	0.250788935	0.055838186	4.491351728	7.08E-06	0.141	0.36	0.020802234	I	Red	6	168841574	R	NA	SMOC2;SMOC2	NM_001166412;NM_022138	TSS1500;TSS1500	chr6:168841438-168841699	Island
cg20780302	0.45378356	0.096731271	4.691177477	2.72E-06	0.264	0.643	0.019595269	I	Red	17	80062106	R	NA	CCDC57	NM_198082	Body	chr17:80058665-80058884	S_Shelf
cg20781461	-0.337101318	0.083347348	-4.044535615	5.24E-05	-0.5	-0.174	0.030928199	I	Grn	17	42836175	R	NA	ADAM11	NM_002390	TSS1500	chr17:42835776-42836242	Island
cg20788022	0.1938245	0.04234147	4.577651646	4.70E-06	0.111	0.277	0.019595269	I	Red	5	137914700	R	NA	NA	NA	NA	chr5:137910848-137911637	S_Shelf
cg20801603	0.244401299	0.063235729	3.86492418	0.000111124	0.12	0.368	0.037131381	I	Red	18	77319289	R	NA	NA	NA	NA	chr18:77319182-77319421	Island
cg20806085	0.767245907	0.212326368	3.613521551	0.000302066	0.351	1.183	0.049486529	II	NA	8	22108223	F	NA	POLR3D	NM_001722	3'UTR	NA	NA
cg20811840	-0.198418893	0.050025354	-3.966366595	7.30E-05	-0.296	-0.1	0.033206221	I	Red	1	85725092	R	NA	C1orf52;C1orf52	NM_198077;NR_024113	1stExon;Body	chr1:85724701-85725524	Island
cg20835789	-0.577850733	0.142688429	-4.049737849	5.13E-05	-0.858	-0.298	0.030644944	I	Red	3	15469053	F	NA	METTL6;EAF1	NM_152396;NM_033083	TSS200;TSS200	chr3:15468932-15469432	Island
cg20880080	0.275845665	0.070010416	3.940066095	8.15E-05	0.139	0.413	0.034533653	I	Grn	18	19780644	F	NA	GATA6	NM_005257	Body	chr18:19780619-19780899	Island
cg20881074	-0.741007444	0.198450783	-3.733960798	0.000188492	-1.13	-0.352	0.042971435	I	Red	2	45236659	F	NA	SIX2	NM_016932	TSS200	chr2:45235511-45237792	Island
cg20905516	-0.168741865	0.046607088	-3.620519403	0.000294012	-0.26	-0.077	0.049092143	I	Red	11	106889364	F	NA	GUCY1A2	NM_000855	TSS200	chr11:106888323-106890203	Island
cg20916237	-0.655788789	0.176099914	-3.723958601	0.000196123	-1.001	-0.311	0.043450484	I	Red	14	105487215	F	NA	CDCA4;CDCA4	NM_017955;NM_145701	5'UTR;5'UTR	chr14:105486611-105487915	Island
cg20943255	0.692700046	0.185360776	3.737036822	0.000186202	0.329	1.056	0.042744266	II	NA	16	432545	R	NA	TMEM8A;LOC100134368	NM_021259;NR_024453	TSS1500;Body	chr16:431189-432810	Island
cg20959480	0.257870819	0.069061247	3.733943855	0.000188505	0.123	0.393	0.042971435	I	Red	12	125599568	R	NA	AACS	NM_023928	Body	chr12:125599306-125599625	Island
cg20963020	0.278436997	0.07704143	3.614120326	0.000301369	0.127	0.429	0.049470099	I	Red	17	77081760	R	NA	ENGASE	NM_001042573	Body	NA	NA
cg20966659	0.407867086	0.105567614	3.863562617	0.000111745	0.201	0.615	0.03718532	I	Red	3	126379474	F	rs80112987	NA	NA	NA	NA	NA
cg20977198	0.222540328	0.053601642	4.151744604	3.30E-05	0.117	0.328	0.028922362	I	Red	6	164061673	F	NA	NA	NA	NA	NA	NA
cg20985162	-0.261049714	0.07181578	-3.634990978	0.00027799	-0.402	-0.12	0.048412787	I	Red	12	66563906	F	NA	TMBIM4	NM_016056	TSS200	chr12:66563202-66563945	Island
cg20990694	0.34884513	0.091803919	3.799893669	0.000144758	0.169	0.529	0.039603133	I	Red	7	150417431	F	NA	GIMAP1	NM_130759	Body	chr7:150417414-150418018	Island
cg21010995	0.568281135	0.140331848	4.049552139	5.13E-05	0.293	0.843	0.030644944	I	Grn	1	5927942	R	NA	NPHP4	NM_015102	Body	NA	NA
cg21017775	0.381890197	0.10294083	3.709802977	0.000207421	0.18	0.584	0.044165261	II	NA	11	34535481	R	NA	ELF5	NM_001422	TSS200	NA	NA
cg21021052	0.25926694	0.064083695	4.045755155	5.22E-05	0.134	0.385	0.030897333	I	Grn	8	43055930	F	rs61743005	HGSNAT	NM_152419	3'UTR	chr8:43059755-43059973	N_Shelf
cg21041888	0.298806085	0.076493963	3.906270156	9.37E-05	0.149	0.449	0.035550511	I	Red	4	187622164	R	NA	FAT1	NM_005245	Body	NA	NA
cg21042902	-0.245142152	0.067213166	-3.647234085	0.000265078	-0.377	-0.113	0.047554743	I	Red	5	176873577	R	NA	PRR7	NM_030567	TSS1500	chr5:176873349-176874737	Island
cg21053935	0.157033989	0.041947328	3.743599362	0.000181403	0.075	0.239	0.042485888	I	Red	7	4030038	F	rs73296671	SDK1	NM_152744	Body	NA	NA
cg21058987	-0.412703812	0.112693261	-3.662187161	0.000250071	-0.634	-0.192	0.046590992	I	Grn	14	50778937	F	NA	L2HGDH;L2HGDH;ATP5S;ATP5S;ATP5S	NM_024884;NM_024884;NM_001003803;NM_015684;NM_001003805	1stExon;5'UTR;TSS200;TSS200;TSS200	chr14:50778680-50779544	Island
cg21074810	-0.510559197	0.140130082	-3.643466046	0.000268991	-0.785	-0.236	0.047777671	I	Grn	11	77850809	F	rs2156785	ALG8;ALG8	NM_001007027;NM_024079	TSS200;TSS200	chr11:77850482-77850845	Island
cg21086156	-0.158233036	0.04317174	-3.665199376	0.000247146	-0.243	-0.074	0.0465628	I	Red	19	54694904	R	NA	MBOAT7;MBOAT7;MBOAT7;MBOAT7;TSEN34;TSEN34	NM_024298;NM_001146056;NM_001146082;NM_001146083;NM_001077446;NM_024075	TSS1500;TSS1500;TSS1500;TSS1500;TSS200;5'UTR	chr19:54693034-54695497	Island
cg21099624	-0.213341128	0.058578279	-3.641983542	0.000270545	-0.328	-0.099	0.047837573	I	Red	6	43737749	R	NA	VEGFA;VEGFA;VEGFA;VEGFA;VEGFA;VEGFA;VEGFA;VEGFA;VEGFA;VEGFA;VEGFA;VEGFA;VEGFA;VEGFA;VEGFA;VEGFA	NM_001025366;NM_001171630;NM_001171625;NM_001171622;NM_001025369;NM_001171629;NM_001171623;NM_001025370;NM_001171628;NM_001171627;NM_001033756;NM_003376;NM_001171626;NM_001171624;NM_001025367;NM_001025368	TSS200;TSS200;TSS200;TSS200;TSS200;TSS200;TSS200;TSS200;TSS200;TSS200;TSS200;TSS200;TSS200;TSS200;TSS200;TSS200	chr6:43737632-43739852	Island
cg21135563	0.340358299	0.081643417	4.168839454	3.06E-05	0.18	0.5	0.028319524	I	Red	7	2649802	R	NA	IQCE;IQCE	NM_152558;NM_001100390	3'UTR;3'UTR	NA	NA
cg21155852	0.522834066	0.123650636	4.228316837	2.35E-05	0.28	0.765	0.025998984	I	Red	7	2048760	R	NA	MAD1L1;MAD1L1;MAD1L1	NM_003550;NM_001013837;NM_001013836	Body;Body;Body	chr7:2044583-2044788	S_Shelf
cg21156836	0.41090687	0.112189592	3.662611322	0.000249657	0.191	0.631	0.046590992	I	Red	7	16623139	F	NA	NA	NA	NA	chr7:16626148-16626531	N_Shelf
cg21160192	0.51047272	0.137988678	3.699381202	0.000216126	0.24	0.781	0.044762902	II	NA	5	180229544	F	NA	MGAT1;MGAT1;MGAT1;MGAT1;MGAT1	NM_001114618;NM_002406;NM_001114619;NM_001114620;NM_001114617	5'UTR;5'UTR;5'UTR;5'UTR;5'UTR	chr5:180229375-180230147	Island
cg21170029	0.232160603	0.064162392	3.618328382	0.000296512	0.106	0.358	0.049188294	I	Grn	1	209799330	R	NA	LAMB3;LAMB3;LAMB3	NM_001017402;NM_001127641;NM_000228	Body;Body;Body	chr1:209799149-209799354	Island
cg21173440	-0.728382991	0.20041888	-3.634303277	0.000278733	-1.121	-0.336	0.048452609	I	Grn	5	55008212	F	NA	SLC38A9	NM_173514	TSS200	chr5:55007836-55008368	Island
cg21185233	0.244231646	0.06719367	3.634741889	0.000278259	0.113	0.376	0.048423077	II	NA	4	147442789	F	NA	SLC10A7;SLC10A7	NM_032128;NM_001029998	1stExon;1stExon	chr4:147443091-147444062	N_Shore
cg21189611	0.187276326	0.05068115	3.695186999	0.000219725	0.088	0.287	0.044936151	I	Red	9	97691844	R	NA	C9orf3	NM_032823	Body	NA	NA
cg21194807	0.794570443	0.216841179	3.664296819	0.000248019	0.37	1.22	0.046590992	I	Grn	9	116856710	R	NA	KIF12	NM_138424	Body	chr9:116860473-116860695	N_Shelf
cg21196724	0.373632836	0.084612717	4.415799985	1.01E-05	0.208	0.539	0.02152446	I	Red	5	178950855	R	NA	NA	NA	NA	NA	NA
cg21205222	0.465349216	0.11732836	3.96621257	7.30E-05	0.235	0.695	0.033206221	I	Red	8	143876783	F	NA	NA	NA	NA	chr8:143879594-143879806	N_Shelf
cg21214953	-0.214167165	0.050720183	-4.222523546	2.42E-05	-0.314	-0.115	0.026006881	I	Red	2	71357466	F	rs11126320	MPHOSPH10;MPHOSPH10;MCEE	NM_005791;NM_005791;NM_032601	1stExon;5'UTR;TSS200	chr2:71357187-71357952	Island
cg21237313	-0.337935887	0.092839085	-3.640017414	0.00027262	-0.52	-0.156	0.047958301	I	Red	17	37764293	R	NA	NEUROD2	NM_006160	TSS200	chr17:37764092-37764304	Island
cg21243919	-0.253205689	0.069153767	-3.661488031	0.000250755	-0.389	-0.118	0.046618483	I	Red	2	178937706	R	NA	PDE11A;PDE11A	NM_016953;NM_001077197	TSS1500;Body	chr2:178937595-178937907	Island
cg21244846	-0.264410399	0.070126877	-3.77045734	0.000162949	-0.402	-0.127	0.041097937	I	Red	9	27529339	R	NA	MOBKL2B	NM_024761	5'UTR	chr9:27528976-27529885	Island
cg21271015	0.418577266	0.105101317	3.982607228	6.82E-05	0.213	0.625	0.032844427	I	Grn	1	4542704	F	NA	NA	NA	NA	NA	NA
cg21272913	0.440313199	0.12184716	3.613651725	0.000301915	0.201	0.679	0.049486529	II	NA	10	24497779	R	NA	KIAA1217;KIAA1217;KIAA1217;KIAA1217;KIAA1217	NM_019590;NM_019590;NM_001098500;NM_001098501;NM_001098501	1stExon;5'UTR;5'UTR;1stExon;5'UTR	NA	NA
cg21318521	-0.338533295	0.079794734	-4.242551827	2.21E-05	-0.495	-0.182	0.02554631	I	Red	6	107349259	F	NA	C6orf203;C6orf203;C6orf203	NM_016487;NM_001142470;NM_001142468	TSS200;TSS200;TSS200	chr6:107349276-107349720	N_Shore
cg21324402	0.617931765	0.168895195	3.658669885	0.000253528	0.287	0.949	0.04678312	II	NA	6	31786808	R	NA	NA	NA	NA	chr6:31782872-31785190	S_Shore
cg21331821	0.382589543	0.105247795	3.6351312	0.000277839	0.176	0.589	0.048412787	I	Grn	19	58545149	R	NA	ZSCAN1	NM_182572	TSS1500	chr19:58545115-58545897	Island
cg21367838	-0.621642747	0.169462789	-3.668314158	0.000244155	-0.954	-0.29	0.046481088	I	Red	20	47805154	R	NA	STAU1;STAU1;STAU1;STAU1;STAU1	NM_004602;NM_017452;NM_001037328;NM_017454;NM_017453	TSS1500;TSS1500;TSS1500;TSS1500;TSS1500	chr20:47804353-47805160	Island
cg21406869	-0.495670211	0.123190128	-4.023619569	5.73E-05	-0.737	-0.254	0.031685944	II	NA	15	68267607	R	NA	NA	NA	NA	NA	NA
cg21459532	0.20443819	0.043569358	4.692246991	2.70E-06	0.119	0.29	0.019595269	I	Red	18	59483441	R	NA	RNF152	NM_173557	Body	NA	NA
[truncated: 553 more rows]
