# Supplementary material for: DNA methylome profiling of all-cause mortality in comparison with age-associated methylation patterns
Source: Clin Epigenetics. 2019 Feb 8;11:23. doi: 10.1186/s13148-019-0622-4 (PMC6368749; doi:10.1186/s13148-019-0622-4)
Supplement: Supplementary file 5 — Table S2 List of pathways enriched by negative mortality association CpGs with FDR < 0.05. (XLSX 40 kb) [file 13148_2019_622_MOESM5_ESM.xlsx]

## Sheet: Sheet1
Gene Set Name	# Genes in Gene Set (K)	Description	# Genes in Overlap (k)	k/K	p-value	FDR q-value,,
REACTOME_IMMUNE_SYSTEM	933	Genes involved in Immune System	63	675	7.52e-11	9.99E-10,,
REACTOME_CELL_CYCLE	421	Genes involved in Cell Cycle	35	831	4.82e-08	2.73E-07,,
KEGG_MAPK_SIGNALING_PATHWAY	267	MAPK signaling pathway	27	1011	6.82e-08	2.73E-07,,
REACTOME_ADAPTIVE_IMMUNE_SYSTEM	539	Genes involved in Adaptive Immune System	40	742	8.21e-08	2.73E-07,,
ST_ERK1_ERK2_MAPK_PATHWAY	32	ERK1/ERK2 MAPK Pathway	10	3125	2.96e-07	6.57E-07,,
REACTOME_METABOLISM_OF_PROTEINS	518	Genes involved in Metabolism of proteins	38	734	2.97e-07	6.57E-07,,
REACTOME_METABOLISM_OF_RNA	330	Genes involved in Metabolism of RNA	29	879	4.2e-07	7.98E-07,,
REACTOME_DEVELOPMENTAL_BIOLOGY	396	Genes involved in Developmental Biology	32	808	5.27e-07	8.51E-07,,
BIOCARTA_MPR_PATHWAY	34	How Progesterone Initiates Oocyte Membrane	10	2941	5.76e-07	8.51E-07,,
REACTOME_CLASS_I_MHC_MEDIATED_ANTIGEN_PROCESSING_PRESENTATION	251	Genes involved in Class I MHC mediated antigen processing & presentation	24	956	1.78e-06	2.37E-06,,
REACTOME_DOWNSTREAM_SIGNALING_OF_ACTIVATED_FGFR	100	Genes involved in Downstream signaling of activated FGFR	15	15	2.28e-06	2.76E-06,,
REACTOME_NGF_SIGNALLING_VIA_TRKA_FROM_THE_PLASMA_MEMBRANE	137	Genes involved in NGF signalling via TRKA from the plasma membrane	17	1241	4.91e-06	5.43E-06,,
KEGG_PATHWAYS_IN_CANCER	328	Pathways in cancer	27	823	5.55e-06	5.67E-06,,
REACTOME_AXON_GUIDANCE	251	Genes involved in Axon guidance	23	916	7.69e-06	7.30E-06,,
REACTOME_SIGNALING_BY_FGFR	112	Genes involved in Signaling by FGFR	15	1339	1.08e-05	9.53E-06,,
REACTOME_FRS2_MEDIATED_CASCADE	36	Genes involved in FRS2-mediated cascade	9	25	1.6e-05	1.29E-05,,
BIOCARTA_PLCE_PATHWAY	12	Phospholipase C-epsilon pathway	6	5	1.74e-05	1.29E-05,,
KEGG_HUNTINGTONS_DISEASE	185	Huntington's disease	19	1027	1.75e-05	1.29E-05,,
REACTOME_ANTIGEN_PROCESSING_UBIQUITINATION_PROTEASOME_DEGRADATION	212	Genes involved in Antigen processing: Ubiquitination & Proteasome degradation	20	943	3.34e-05	2.23E-05,,
REACTOME_SIGNALING_BY_PDGF	122	Genes involved in Signaling by PDGF	15	123	3.36e-05	2.23E-05,,
REACTOME_NCAM_SIGNALING_FOR_NEURITE_OUT_GROWTH	64	Genes involved in NCAM signaling for neurite out-growth	11	1719	4.13e-05	2.61E-05,,
KEGG_PURINE_METABOLISM	159	Purine metabolism	17	1069	4.33e-05	2.61E-05,,
REACTOME_SIGNALING_BY_FGFR_IN_DISEASE	127	Genes involved in Signaling by FGFR in disease	15	1181	5.69e-05	3.22E-05,,
REACTOME_DOWNSTREAM_SIGNAL_TRANSDUCTION	95	Genes involved in Downstream signal transduction	13	1368	5.84e-05	3.22E-05,,
REACTOME_CELL_CYCLE_MITOTIC	325	Genes involved in Cell Cycle, Mitotic	25	769	6.07e-05	3.22E-05,
REACTOME_METABOLISM_OF_MRNA	284	Genes involved in Metabolism of mRNA	23	81	6.96e-05	3.56E-05,,
BIOCARTA_IGF1R_PATHWAY	23	Multiple antiapoptotic pathways from IGF-1R signaling lead to BAD phosphorylation	7	3043	9.05e-05	4.45E-05,,
REACTOME_CYTOKINE_SIGNALING_IN_IMMUNE_SYSTEM	270	Genes involved in Cytokine Signaling in Immune system	22	815	0.000109	5.17E-05,,
REACTOME_SIGNALING_BY_ERBB2	101	Genes involved in Signaling by ERBB2	13	1287	0.000119	5.46E-05,,
KEGG_INSULIN_SIGNALING_PATHWAY	137	Insulin signaling pathway	15	1095	0.000151	6.68E-05,,
REACTOME_SIGNALLING_BY_NGF	217	Genes involved in Signalling by NGF	19	876	0.000201	8.48E-05,,
REACTOME_HEMOSTASIS	466	Genes involved in Hemostasis	30	644	0.000204	8.48E-05,,
BIOCARTA_MET_PATHWAY	37	Signaling of Hepatocyte Growth Factor Receptor	8	2162	0.00026	1.05E-04,,
KEGG_SPLICEOSOME	128	Spliceosome	14	1094	0.000338	1.32E-04,,
BIOCARTA_ERK_PATHWAY	28	Erk1/Erk2 Mapk Signaling pathway	7	25	0.000393	1.49E-04,,
KEGG_ENDOMETRIAL_CANCER	52	Endometrial cancer	9	1731	0.00044	1.63E-04,,
REACTOME_DIABETES_PATHWAYS	133	Genes involved in Diabetes pathways	14	1053	0.000532	1.91E-04,,
BIOCARTA_MAPK_PATHWAY	87	MAPKinase Signaling Pathway	11	1264	0.000932	3.18E-04,,
REACTOME_INSULIN_RECEPTOR_SIGNALLING_CASCADE	87	Genes involved in Insulin receptor signalling cascade	11	1264	0.000932	3.18E-04,,
KEGG_RIBOSOME	88	Ribosome	11	125	0.00104	3.40E-04,,
REACTOME_TCA_CYCLE_AND_RESPIRATORY_ELECTRON_TRANSPORT	141	Genes involved in The citric acid (TCA) cycle and respiratory electron transport	14	993	0.00105	3.40E-04,,
REACTOME_MRNA_PROCESSING	161	Genes involved in mRNA Processing	15	932	0.00111	3.52E-04,,
KEGG_RNA_DEGRADATION	59	RNA degradation	9	1525	0.00129	3.83E-04,,
KEGG_GAP_JUNCTION	90	Gap junction	11	1222	0.0013	3.83E-04,,
REACTOME_SIGNALING_BY_ERBB4	90	Genes involved in Signaling by ERBB4	11	1222	0.0013	3.83E-04,,
KEGG_NEUROTROPHIN_SIGNALING_PATHWAY	126	Neurotrophin signaling pathway	13	1032	0.00142	4.02E-04,,
REACTOME_SIGNALING_BY_INSULIN_RECEPTOR	108	Genes involved in Signaling by Insulin receptor	12	1111	0.00142	4.02E-04,,
REACTOME_SOS_MEDIATED_SIGNALLING	14	Genes involved in SOS-mediated signalling	5	3571	0.00146	4.04E-04,,
REACTOME_SIGNALING_BY_EGFR_IN_CANCER	109	Genes involved in Signaling by EGFR in Cancer	12	1101	0.00156	4.24E-04,,
KEGG_ALZHEIMERS_DISEASE	169	Alzheimer's disease	15	888	0.00199	5.22E-04,,
PID_HEDGEHOG_GLI_PATHWAY	48	Hedgehog signaling events mediated by Gli proteins	8	1667	0.002	5.22E-04,,
REACTOME_SIGNALING_BY_SCF_KIT	78	Genes involved in Signaling by SCF-KIT	10	1282	0.00209	5.27E-04,,
REACTOME_SHC1_EVENTS_IN_EGFR_SIGNALING	15	Genes involved in SHC1 events in EGFR signaling	5	3333	0.00214	5.27E-04,,
REACTOME_SHC_MEDIATED_SIGNALLING	15	Genes involved in SHC-mediated signalling	5	3333	0.00214	5.27E-04,,
REACTOME_RESPIRATORY_ELECTRON_TRANSPORT	79	Genes involved in Respiratory electron transport	10	1266	0.00234	5.65E-04,,
REACTOME_METABOLISM_OF_LIPIDS_AND_LIPOPROTEINS	478	Genes involved in Metabolism of lipids and lipoproteins	28	586	0.00249	5.91E-04,,
PID_LYMPH_ANGIOGENESIS_PATHWAY	25	VEGFR3 signaling in lymphatic endothelium	6	24	0.00254	5.91E-04,,
REACTOME_UNFOLDED_PROTEIN_RESPONSE	80	Genes involved in Unfolded Protein Response	10	125	0.00261	5.99E-04,,
KEGG_REGULATION_OF_ACTIN_CYTOSKELETON	216	Regulation of actin cytoskeleton	17	787	0.00274	6.18E-04,,
REACTOME_RESPIRATORY_ELECTRON_TRANSPORT_ATP_SYNTHESIS_BY_CHEMIOSMOTIC_COUPLING_AND_HEAT_PRODUCTION_BY_UNCOUPLING_PROTEINS_	98	Genes involved in Respiratory electron transport, ATP synthesis by chemiosmotic coupling, and heat production by uncoupling proteins.	11	1122	0.00292	6.47E-04
BIOCARTA_SHH_PATHWAY	16	Sonic Hedgehog (Shh) Pathway	5	3125	0.00305	6.65E-04,,
SIG_INSULIN_RECEPTOR_PATHWAY_IN_CARDIAC_MYOCYTES	51	Genes related to the insulin receptor pathway	8	1569	0.00317	6.79E-04,,
BIOCARTA_INTEGRIN_PATHWAY	38	Integrin Signaling Pathway	7	1842	0.00338	7.02E-04,,
KEGG_SNARE_INTERACTIONS_IN_VESICULAR_TRANSPORT	38	SNARE interactions in vesicular transport	7	1842	0.00338	7.02E-04,,
KEGG_MTOR_SIGNALING_PATHWAY	52	mTOR signaling pathway	8	1538	0.00367	7.50E-04,,
REACTOME_ACTIVATION_OF_THE_MRNA_UPON_BINDING_OF_THE_CAP_BINDING_COMPLEX_AND_EIFS_AND_SUBSEQUENT_BINDING_TO_43S	84	Genes involved in Activation of the mRNA upon binding of the cap-binding complex and eIFs, and subsequent binding to 43S	10	119	0.00401	8.06E-04,
BIOCARTA_CREB_PATHWAY	27	Transcription factor CREB and its extracellular signals	6	2222	0.00407	8.06E-04,,
PID_TELOMERASE_PATHWAY	68	Regulation of Telomerase	9	1324	0.00416	8.07E-04,,
REACTOME_SHC_RELATED_EVENTS	17	Genes involved in SHC-related events	5	2941	0.00424	8.07E-04,,
PID_CXCR4_PATHWAY	102	CXCR4-mediated signaling events	11	1078	0.00425	8.07E-04,,
REACTOME_PROCESSING_OF_CAPPED_INTRON_CONTAINING_PRE_MRNA	140	Genes involved in Processing of Capped Intron-Containing Pre-mRNA	13	929	0.00437	8.17E-04,,
PID_MTOR_4PATHWAY	69	mTOR signaling pathway	9	1304	0.00468	8.63E-04,,
REACTOME_CHROMOSOME_MAINTENANCE	122	Genes involved in Chromosome Maintenance	12	984	0.00484	8.82E-04,,
REACTOME_LATE_PHASE_OF_HIV_LIFE_CYCLE	104	Genes involved in Late Phase of HIV Life Cycle	11	1058	0.00509	9.14E-04,,
KEGG_LONG_TERM_POTENTIATION	70	Long-term potentiation	9	1286	0.00525	9.18E-04,,
KEGG_RENAL_CELL_CARCINOMA	70	Renal cell carcinoma	9	1286	0.00525	9.18E-04,,
PID_ERBB1_DOWNSTREAM_PATHWAY	105	ErbB1 downstream signaling	11	1048	0.00556	9.60E-04,,
BIOCARTA_PTEN_PATHWAY	18	PTEN dependent cell cycle arrest and apoptosis	5	2778	0.00575	9.79E-04,,
REACTOME_PI_3K_CASCADE	56	Genes involved in PI-3K cascade	8	1429	0.00635	1.07E-03,,
REACTOME_RAF_MAP_KINASE_CASCADE	10	Genes involved in RAF/MAP kinase cascade	4	4	0.00669	1.11E-03,,
REACTOME_TRANSCRIPTION	210	Genes involved in Transcription	16	762	0.00689	1.13E-03,,
REACTOME_FATTY_ACID_TRIACYLGLYCEROL_AND_KETONE_BODY_METABOLISM	168	Genes involved in Fatty acid, triacylglycerol, and ketone body metabolism	14	833	0.00741	1.20E-03
REACTOME_FORMATION_OF_THE_TERNARY_COMPLEX_AND_SUBSEQUENTLY_THE_43S_COMPLEX	74	Genes involved in Formation of the ternary complex, and subsequently, the 43S complex	9	1216	0.00818	1.31E-03
PID_PDGFRB_PATHWAY	129	PDGFR-beta signaling pathway	12	93	0.00835	1.32E-03,,
REACTOME_DNA_REPLICATION	192	Genes involved in DNA Replication	15	781	0.00867	1.36E-03,,
KEGG_ABC_TRANSPORTERS	44	ABC transporters	7	1591	0.00904	1.38E-03,,
PID_ERBB2_ERBB3_PATHWAY	44	ErbB2/ErbB3 signaling events	7	1591	0.00904	1.38E-03,,
REACTOME_LOSS_OF_NLP_FROM_MITOTIC_CENTROSOMES	59	Genes involved in Loss of Nlp from mitotic centrosomes	8	1356	0.00929	1.40E-03,,
REACTOME_MITOTIC_M_M_G1_PHASES	172	Genes involved in Mitotic M-M/G1 phases	14	814	0.00954	1.43E-03,,
REACTOME_SHC1_EVENTS_IN_ERBB4_SIGNALING	20	Genes involved in SHC1 events in ERBB4 signaling	5	25	0.00999	1.47E-03,,
BIOCARTA_RHO_PATHWAY	32	Rho cell motility signaling pathway	6	1875	0.0112	1.64E-03,,
REACTOME_MITOCHONDRIAL_TRNA_AMINOACYLATION	21	Genes involved in Mitochondrial tRNA aminoacylation	5	2381	0.0128	1.85E-03,,
KEGG_OXIDATIVE_PHOSPHORYLATION	135	Oxidative phosphorylation	12	889	0.0129	1.85E-03,,
PID_TRKR_PATHWAY	62	Neurotrophic factor-mediated Trk receptor signaling	8	129	0.0133	1.87E-03,,
REACTOME_POST_NMDA_RECEPTOR_ACTIVATION_EVENTS	33	Genes involved in Post NMDA receptor activation events	6	1818	0.0134	1.87E-03,,
REACTOME_METABOLISM_OF_AMINO_ACIDS_AND_DERIVATIVES	200	Genes involved in Metabolism of amino acids and derivatives	15	75	0.0137	1.87E-03,,
KEGG_FC_GAMMA_R_MEDIATED_PHAGOCYTOSIS	97	Fc gamma R-mediated phagocytosis	10	1031	0.0137	1.87E-03,,
REACTOME_MEIOSIS	116	Genes involved in Meiosis	11	948	0.0138	1.87E-03,,
REACTOME_METABOLISM_OF_CARBOHYDRATES	247	Genes involved in Metabolism of carbohydrates	17	688	0.0144	1.92E-03,,
KEGG_FOCAL_ADHESION	201	Focal adhesion	15	746	0.0144	1.92E-03,,
REACTOME_MITOTIC_G1_G1_S_PHASES	137	Genes involved in Mitotic G1-G1/S phases	12	876	0.0149	1.95E-03,,
BIOCARTA_CFTR_PATHWAY	12	Cystic Fibrosis Transmembrane Conductance Regulator And Beta 2 Adrenergic Receptor Pathway	4	3333	0.0152	1.98E-03,,
PID_IL2_PI3K_PATHWAY	34	IL2 signaling events mediated by PI3K	6	1765	0.016	2.00E-03,,
PID_MAPK_TRK_PATHWAY	34	Trk receptor signaling mediated by the MAPK pathway	6	1765	0.016	2.00E-03,,
REACTOME_ABC_FAMILY_PROTEINS_MEDIATED_TRANSPORT	34	Genes involved in ABC-family proteins mediated transport	6	1765	0.016	2.00E-03,,
REACTOME_SIGNAL_TRANSDUCTION_BY_L1	34	Genes involved in Signal transduction by L1	6	1765	0.016	2.00E-03,,
REACTOME_INFLUENZA_LIFE_CYCLE	203	Genes involved in Influenza Life Cycle	15	739	0.0161	2.00E-03,,
REACTOME_GRB2_EVENTS_IN_ERBB2_SIGNALING	22	Genes involved in GRB2 events in ERBB2 signaling	5	2273	0.0163	2.00E-03,,
REACTOME_ASPARAGINE_N_LINKED_GLYCOSYLATION	81	Genes involved in Asparagine N-linked glycosylation	9	1111	0.0166	2.02E-03,,
REACTOME_GASTRIN_CREB_SIGNALLING_PATHWAY_VIA_PKC_AND_MAPK	205	Genes involved in Gastrin-CREB signalling pathway via PKC and MAPK	15	732	0.0179	2.16E-03,,
PID_ARF6_TRAFFICKING_PATHWAY	49	Arf6 trafficking events	7	1429	0.0182	2.16E-03,,
REACTOME_METABOLISM_OF_NON_CODING_RNA	49	Genes involved in Metabolism of non-coding RNA	7	1429	0.0182	2.16E-03,,
REACTOME_GENERIC_TRANSCRIPTION_PATHWAY	352	Genes involved in Generic Transcription Pathway	21	597	0.0191	2.25E-03,,
REACTOME_HIV_INFECTION	207	Genes involved in HIV Infection	15	725	0.0199	2.31E-03,,
REACTOME_MYD88_MAL_CASCADE_INITIATED_ON_PLASMA_MEMBRANE	83	Genes involved in MyD88:Mal cascade initiated on plasma membrane	9	1084	0.02	2.31E-03,,
REACTOME_RECRUITMENT_OF_MITOTIC_CENTROSOME_PROTEINS_AND_COMPLEXES	66	Genes involved in Recruitment of mitotic centrosome proteins and complexes	8	1212	0.0207	2.37E-03,,
REACTOME_PLATELET_ACTIVATION_SIGNALING_AND_AGGREGATION	208	Genes involved in Platelet activation, signaling and aggregation	15	721	0.021	2.39E-03,
REACTOME_REGULATION_OF_MRNA_STABILITY_BY_PROTEINS_THAT_BIND_AU_RICH_ELEMENTS	84	Genes involved in Regulation of mRNA Stability by Proteins that Bind AU-rich Elements	9	1071	0.0219	2.47E-03,,
SIG_PIP3_SIGNALING_IN_B_LYMPHOCYTES	36	Genes related to PIP3 signaling in B lymphocytes	6	1667	0.0222	2.48E-03,,
REACTOME_CELL_CYCLE_CHECKPOINTS	124	Genes involved in Cell Cycle Checkpoints	11	887	0.0248	2.75E-03,,
REACTOME_NUCLEAR_EVENTS_KINASE_AND_TRANSCRIPTION_FACTOR_ACTIVATION	24	Genes involved in Nuclear Events (kinase and transcription factor activation)	5	2083	0.0252	2.75E-03,,
SA_B_CELL_RECEPTOR_COMPLEXES	24	Antigen binding to B cell receptors activates protein tyrosine kinases, such as the Src family, which ultimate activate MAP kinases.	5	2083	0.0252	2.75E-03
REACTOME_ACTIVATION_OF_NMDA_RECEPTOR_UPON_GLUTAMATE_BINDING_AND_POSTSYNAPTIC_EVENTS	37	Genes involved in Activation of NMDA receptor upon glutamate binding and postsynaptic events	6	1622	0.0259	2.76E-03,,
REACTOME_NEGATIVE_REGULATION_OF_FGFR_SIGNALING	37	Genes involved in Negative regulation of FGFR signaling	6	1622	0.0259	2.76E-03,,
ST_P38_MAPK_PATHWAY	37	p38 MAPK Pathway	6	1622	0.0259	2.76E-03,,
REACTOME_HIV_LIFE_CYCLE	125	Genes involved in HIV Life Cycle	11	88	0.0266	2.81E-03,,
REACTOME_SIGNALING_BY_THE_B_CELL_RECEPTOR_BCR	126	Genes involved in Signaling by the B Cell Receptor (BCR)	11	873	0.0285	2.98E-03,,
BIOCARTA_MCALPAIN_PATHWAY	25	mCalpain and friends in Cell motility	5	2	0.0309	3.18E-03,,
REACTOME_SMOOTH_MUSCLE_CONTRACTION	25	Genes involved in Smooth Muscle Contraction	5	2	0.0309	3.18E-03,,
KEGG_CELL_CYCLE	128	Cell cycle	11	859	0.0327	3.34E-03,,
REACTOME_PHOSPHOLIPASE_C_MEDIATED_CASCADE	54	Genes involved in Phospholipase C-mediated cascade	7	1296	0.0338	3.42E-03,,
KEGG_PROSTATE_CANCER	89	Prostate cancer	9	1011	0.0339	3.42E-03,,
KEGG_MELANOMA	71	Melanoma	8	1127	0.0344	3.44E-03,,
BIOCARTA_BAD_PATHWAY	26	Regulation of BAD phosphorylation	5	1923	0.0375	3.72E-03,,
REACTOME_NFKB_AND_MAP_KINASES_ACTIVATION_MEDIATED_BY_TLR4_SIGNALING_REPERTOIRE	72	Genes involved in NFkB and MAP kinases activation mediated by TLR4 signaling repertoire	8	1111	0.0379	3.73E-03,,
REACTOME_SIGNALLING_TO_P38_VIA_RIT_AND_RIN	15	Genes involved in Signalling to p38 via RIT and RIN	4	2667	0.0394	3.85E-03,,
REACTOME_GLYCOSAMINOGLYCAN_METABOLISM	111	Genes involved in Glycosaminoglycan metabolism	10	901	0.0414	3.98E-03,,
KEGG_CHRONIC_MYELOID_LEUKEMIA	73	Chronic myeloid leukemia	8	1096	0.0417	3.98E-03,,
REACTOME_MEIOTIC_SYNAPSIS	73	Genes involved in Meiotic Synapsis	8	1096	0.0417	3.98E-03,,
REACTOME_TRANSLATION	222	Genes involved in Translation	15	676	0.0421	4.00E-03,,
BIOCARTA_NFAT_PATHWAY	56	NFAT and Hypertrophy of the heart (Transcription in the broken heart)	7	125	0.0424	4.00E-03,,
REACTOME_G1_S_TRANSITION	112	Genes involved in G1/S Transition	10	893	0.0445	4.16E-03,,
REACTOME_CREB_PHOSPHORYLATION_THROUGH_THE_ACTIVATION_OF_RAS	27	Genes involved in CREB phosphorylation through the activation of Ras	5	1852	0.0451	4.16E-03,,
REACTOME_SIGNALLING_TO_RAS	27	Genes involved in Signalling to RAS	5	1852	0.0451	4.16E-03,,
KEGG_PARKINSONS_DISEASE	133	Parkinson's disease	11	827	0.0454	4.16E-03,,
REACTOME_TRIF_MEDIATED_TLR3_SIGNALING	74	Genes involved in TRIF mediated TLR3 signaling	8	1081	0.0457	4.16E-03,,
REACTOME_IL_2_SIGNALING	41	Genes involved in Interleukin-2 signaling	6	1463	0.0461	4.17E-03,,
REACTOME_ACTIVATED_TLR4_SIGNALLING	93	Genes involved in Activated TLR4 signalling	9	968	0.0471	4.23E-03,,
KEGG_B_CELL_RECEPTOR_SIGNALING_PATHWAY	75	B cell receptor signaling pathway	8	1067	0.0501	4.44E-03,,
REACTOME_TELOMERE_MAINTENANCE	75	Genes involved in Telomere Maintenance	8	1067	0.0501	4.44E-03,,
REACTOME_MITOCHONDRIAL_PROTEIN_IMPORT	58	Genes involved in Mitochondrial Protein Import	7	1207	0.0527	4.61E-03,,
REACTOME_TRNA_AMINOACYLATION	42	Genes involved in tRNA Aminoacylation	6	1429	0.0527	4.61E-03,,
BIOCARTA_GH_PATHWAY	28	Growth Hormone Signaling Pathway	5	1786	0.0538	4.64E-03,,
REACTOME_SHC_MEDIATED_CASCADE	28	Genes involved in SHC-mediated cascade	5	1786	0.0538	4.64E-03,,
KEGG_PATHOGENIC_ESCHERICHIA_COLI_INFECTION	59	Pathogenic Escherichia coli infection	7	1186	0.0585	5.02E-03,,
REACTOME_TRAF6_MEDIATED_INDUCTION_OF_NFKB_AND_MAP_KINASES_UPON_TLR7_8_OR_9_ACTIVATION	77	Genes involved in TRAF6 mediated induction of NFkB and MAP kinases upon TLR7/8 or 9 activation	8	1039	0.0599	5.08E-03,,
PID_TCPTP_PATHWAY	43	Signaling events mediated by TCPTP	6	1395	0.06	5.08E-03,,
KEGG_THYROID_CANCER	29	Thyroid cancer	5	1724	0.0637	5.36E-03,,
REACTOME_ARMS_MEDIATED_ACTIVATION	17	Genes involved in ARMS-mediated activation	4	2353	0.0661	5.42E-03,,
REACTOME_DESTABILIZATION_OF_MRNA_BY_BRF1	17	Genes involved in Destabilization of mRNA by Butyrate Response Factor 1 (BRF1)	4	2353	0.0661	5.42E-03,,
REACTOME_DESTABILIZATION_OF_MRNA_BY_TRISTETRAPROLIN_TTP	17	Genes involved in Destabilization of mRNA by Tristetraprolin (TTP)	4	2353	0.0661	5.42E-03,,
REACTOME_PROTEOLYTIC_CLEAVAGE_OF_SNARE_COMPLEX_PROTEINS	17	Genes involved in Proteolytic cleavage of SNARE complex proteins	4	2353	0.0661	5.42E-03,,
PID_MYC_ACTIV_PATHWAY	79	Validated targets of C-MYC transcriptional activation	8	1013	0.0711	5.80E-03,,
REACTOME_MAPK_TARGETS_NUCLEAR_EVENTS_MEDIATED_BY_MAP_KINASES	30	Genes involved in MAPK targets/ Nuclear events mediated by MAP kinases	5	1667	0.0749	6.07E-03,,
REACTOME_G2_M_CHECKPOINTS	45	Genes involved in G2/M Checkpoints	6	1333	0.0769	6.19E-03,,
PID_MET_PATHWAY	80	Signaling events mediated by Hepatocyte Growth Factor Receptor (c-Met)	8	1	0.0773	6.19E-03,,
KEGG_COLORECTAL_CANCER	62	Colorectal cancer	7	1129	0.0792	6.30E-03,,
REACTOME_REGULATION_OF_SIGNALING_BY_CBL	18	Genes involved in Regulation of signaling by CBL	4	2222	0.0834	6.57E-03,,
REACTOME_M_G1_TRANSITION	81	Genes involved in M/G1 Transition	8	988	0.084	6.57E-03,,
REACTOME_MITOTIC_G2_G2_M_PHASES	81	Genes involved in Mitotic G2-G2/M phases	8	988	0.084	6.57E-03,,
PID_A6B1_A6B4_INTEGRIN_PATHWAY	46	a6b1 and a6b4 Integrin signaling	6	1304	0.0866	6.73E-03,,
PID_MYC_REPRESS_PATHWAY	63	Validated targets of C-MYC transcriptional repression	7	1111	0.0872	6.73E-03,,
PID_NEPHRIN_NEPH1_PATHWAY	31	Nephrin/Neph1 signaling in the kidney podocyte	5	1613	0.0875	6.73E-03,,
KEGG_CHEMOKINE_SIGNALING_PATHWAY	190	Chemokine signaling pathway	13	684	0.0885	6.76E-03,,
ST_INTEGRIN_SIGNALING_PATHWAY	82	Integrin Signaling Pathway	8	976	0.0911	6.92E-03,,
REACTOME_SIGNALING_BY_NOTCH	103	Genes involved in Signaling by NOTCH	9	874	0.099	7.47E-03,,
NABA_MATRISOME	1028	Ensemble of genes encoding extracellular matrix and extracellular matrix-associated proteins	42	409	0.102	7.68E-03,,
REACTOME_BOTULINUM_NEUROTOXICITY	19	Genes involved in Botulinum neurotoxicity	4	2105	0.104	7.69E-03,,
REACTOME_PROLONGED_ERK_ACTIVATION_EVENTS	19	Genes involved in Prolonged ERK activation events	4	2105	0.104	7.69E-03,,
PID_ERA_GENOMIC_PATHWAY	65	Validated nuclear estrogen receptor alpha network	7	1077	0.105	7.77E-03,,
REACTOME_DEADENYLATION_DEPENDENT_MRNA_DECAY	48	Genes involved in Deadenylation-dependent mRNA decay	6	125	0.109	7.99E-03,,
REACTOME_RNA_POL_II_TRANSCRIPTION	105	Genes involved in RNA Polymerase II Transcription	9	857	0.114	8.29E-03,,
PID_HDAC_CLASSI_PATHWAY	66	Signaling events mediated by HDAC Class I	7	1061	0.115	8.32E-03,,
PID_INTEGRIN1_PATHWAY	66	Beta1 integrin cell surface interactions	7	1061	0.115	8.32E-03,,
BIOCARTA_NO1_PATHWAY	33	Actions of Nitric Oxide in the Heart	5	1515	0.117	8.39E-03,,
REACTOME_TRANSPORT_OF_MATURE_MRNA_DERIVED_FROM_AN_INTRONLESS_TRANSCRIPT	33	Genes involved in Transport of Mature mRNA Derived from an Intronless Transcript	5	1515	0.117	8.39E-03,,
PID_PI3KCI_PATHWAY	49	Class I PI3K signaling events	6	1224	0.122	8.64E-03,,
KEGG_PROGESTERONE_MEDIATED_OOCYTE_MATURATION	86	Progesterone-mediated oocyte maturation	8	93	0.125	8.76E-03,,
REACTOME_L1CAM_INTERACTIONS	86	Genes involved in L1CAM interactions	8	93	0.125	8.76E-03,,
SIG_PIP3_SIGNALING_IN_CARDIAC_MYOCTES	67	Genes related to PIP3 signaling in cardiac myocytes	7	1045	0.126	8.81E-03,,
REACTOME_SIGNALING_BY_ILS	107	Genes involved in Signaling by Interleukins	9	841	0.13	9.02E-03,,
KEGG_ERBB_SIGNALING_PATHWAY	87	ErbB signaling pathway	8	92	0.134	9.27E-03,,
PID_HDAC_CLASSII_PATHWAY	34	Signaling events mediated by HDAC Class II	5	1471	0.135	9.27E-03,,
REACTOME_MAP_KINASE_ACTIVATION_IN_TLR_CASCADE	50	Genes involved in MAP kinase activation in TLR cascade	6	12	0.135	9.27E-03,,
KEGG_T_CELL_RECEPTOR_SIGNALING_PATHWAY	108	T cell receptor signaling pathway	9	833	0.138	9.44E-03,,
REACTOME_3_UTR_MEDIATED_TRANSLATIONAL_REGULATION	176	Genes involved in 3' -UTR-mediated translational regulation	12	682	0.142	9.60E-03,,
REACTOME_S_PHASE	109	Genes involved in S Phase	9	826	0.148	9.97E-03,,
REACTOME_TRANSMEMBRANE_TRANSPORT_OF_SMALL_MOLECULES	413	Genes involved in Transmembrane transport of small molecules	21	508	0.15	1.00E-02,,
KEGG_P53_SIGNALING_PATHWAY	69	p53 signaling pathway	7	1014	0.15	1.00E-02,,
BIOCARTA_TFF_PATHWAY	21	Trefoil Factors Initiate Mucosal Healing	4	1905	0.154	1.01E-02,,

## Sheet: Table_S2_negative_mortality ass
Gene Set Name # Genes in Gene Set (K) Description # Genes in Overlap (k) k/K p-value FDR q-value
REACTOME_IMMUNE_SYSTEM 933 Genes involved in Immune System 63 0.0675 7.52E-13 9.99E-10
REACTOME_CELL_CYCLE 421 Genes involved in Cell Cycle 35 0.0831 4.82E-10 2.73E-07
KEGG_MAPK_SIGNALING_PATHWAY 267 MAPK signaling pathway 27 0.1011 6.82E-10 2.73E-07
REACTOME_ADAPTIVE_IMMUNE_SYSTEM 539 Genes involved in Adaptive Immune System 40 0.0742 8.21E-10 2.73E-07
ST_ERK1_ERK2_MAPK_PATHWAY 32 ERK1/ERK2 MAPK Pathway 10 0.3125 2.96E-09 6.57E-07
REACTOME_METABOLISM_OF_PROTEINS 518 Genes involved in Metabolism of proteins 38 0.0734 2.97E-09 6.57E-07
REACTOME_METABOLISM_OF_RNA 330 Genes involved in Metabolism of RNA 29 0.0879 4.20E-09 7.98E-07
REACTOME_DEVELOPMENTAL_BIOLOGY 396 Genes involved in Developmental Biology 32 0.0808 5.27E-09 8.51E-07
BIOCARTA_MPR_PATHWAY 34 How Progesterone Initiates Oocyte Membrane 10 0.2941 5.76E-09 8.51E-07
REACTOME_CLASS_I_MHC_MEDIATED_ANTIGEN_PROCESSING_PRESENTATION 251 Genes involved in Class I MHC mediated antigen processing & presentation 24 0.0956 1.78E-08 2.37E-06
REACTOME_DOWNSTREAM_SIGNALING_OF_ACTIVATED_FGFR 100 Genes involved in Downstream signaling of activated FGFR 15 0.15 2.28E-08 2.76E-06
REACTOME_NGF_SIGNALLING_VIA_TRKA_FROM_THE_PLASMA_MEMBRANE 137 Genes involved in NGF signalling via TRKA from the plasma membrane 17 0.1241 4.91E-08 5.43E-06
KEGG_PATHWAYS_IN_CANCER 328 Pathways in cancer 27 0.0823 5.55E-08 5.67E-06
REACTOME_AXON_GUIDANCE 251 Genes involved in Axon guidance 23 0.0916 7.69E-08 7.30E-06
REACTOME_SIGNALING_BY_FGFR 112 Genes involved in Signaling by FGFR 15 0.1339 1.08E-07 9.53E-06
REACTOME_FRS2_MEDIATED_CASCADE 36 Genes involved in FRS2-mediated cascade 9 0.25 1.60E-07 1.29E-05
BIOCARTA_PLCE_PATHWAY 12 Phospholipase C-epsilon pathway 6 0.5 1.74E-07 1.29E-05
KEGG_HUNTINGTONS_DISEASE 185 Huntington's disease 19 0.1027 1.75E-07 1.29E-05
REACTOME_ANTIGEN_PROCESSING_UBIQUITINATION_PROTEASOME_DEGRADATION 212 Genes involved in Antigen processing: Ubiquitination & Proteasome degradation 20 0.0943 3.34E-07 2.23E-05
REACTOME_SIGNALING_BY_PDGF 122 Genes involved in Signaling by PDGF 15 0.123 3.36E-07 2.23E-05
REACTOME_NCAM_SIGNALING_FOR_NEURITE_OUT_GROWTH 64 Genes involved in NCAM signaling for neurite out-growth 11 0.1719 4.13E-07 2.61E-05
KEGG_PURINE_METABOLISM 159 Purine metabolism 17 0.1069 4.33E-07 2.61E-05
REACTOME_SIGNALING_BY_FGFR_IN_DISEASE 127 Genes involved in Signaling by FGFR in disease 15 0.1181 5.69E-07 3.22E-05
REACTOME_DOWNSTREAM_SIGNAL_TRANSDUCTION 95 Genes involved in Downstream signal transduction 13 0.1368 5.84E-07 3.22E-05
REACTOME_CELL_CYCLE_MITOTIC 325 Genes involved in Cell Cycle	Mitotic 25 0.0769 6.07E-07 3.22E-05
REACTOME_METABOLISM_OF_MRNA 284 Genes involved in Metabolism of mRNA 23 0.081 6.96E-07 3.56E-05
BIOCARTA_IGF1R_PATHWAY 23 Multiple antiapoptotic pathways from IGF-1R signaling lead to BAD phosphorylation 7 0.3043 9.05E-07 4.45E-05
REACTOME_CYTOKINE_SIGNALING_IN_IMMUNE_SYSTEM 270 Genes involved in Cytokine Signaling in Immune system 22 0.0815 1.09E-06 5.17E-05
REACTOME_SIGNALING_BY_ERBB2 101 Genes involved in Signaling by ERBB2 13 0.1287 1.19E-06 5.46E-05
KEGG_INSULIN_SIGNALING_PATHWAY 137 Insulin signaling pathway 15 0.1095 1.51E-06 6.68E-05
REACTOME_SIGNALLING_BY_NGF 217 Genes involved in Signalling by NGF 19 0.0876 2.01E-06 8.48E-05
REACTOME_HEMOSTASIS 466 Genes involved in Hemostasis 30 0.0644 2.04E-06 8.48E-05
BIOCARTA_MET_PATHWAY 37 Signaling of Hepatocyte Growth Factor Receptor 8 0.2162 2.60E-06 1.05E-04
KEGG_SPLICEOSOME 128 Spliceosome 14 0.1094 3.38E-06 1.32E-04
BIOCARTA_ERK_PATHWAY 28 Erk1/Erk2 Mapk Signaling pathway 7 0.25 3.93E-06 1.49E-04
KEGG_ENDOMETRIAL_CANCER 52 Endometrial cancer 9 0.1731 4.40E-06 1.63E-04
REACTOME_DIABETES_PATHWAYS 133 Genes involved in Diabetes pathways 14 0.1053 5.32E-06 1.91E-04
BIOCARTA_MAPK_PATHWAY 87 MAPKinase Signaling Pathway 11 0.1264 9.32E-06 3.18E-04
REACTOME_INSULIN_RECEPTOR_SIGNALLING_CASCADE 87 Genes involved in Insulin receptor signalling cascade 11 0.1264 9.32E-06 3.18E-04
KEGG_RIBOSOME 88 Ribosome 11 0.125 1.04E-05 3.40E-04
REACTOME_TCA_CYCLE_AND_RESPIRATORY_ELECTRON_TRANSPORT 141 Genes involved in The citric acid (TCA) cycle and respiratory electron transport 14 0.0993 1.05E-05 3.40E-04
REACTOME_MRNA_PROCESSING 161 Genes involved in mRNA Processing 15 0.0932 1.11E-05 3.52E-04
KEGG_RNA_DEGRADATION 59 RNA degradation 9 0.1525 1.29E-05 3.83E-04
KEGG_GAP_JUNCTION 90 Gap junction 11 0.1222 1.30E-05 3.83E-04
REACTOME_SIGNALING_BY_ERBB4 90 Genes involved in Signaling by ERBB4 11 0.1222 1.30E-05 3.83E-04
KEGG_NEUROTROPHIN_SIGNALING_PATHWAY 126 Neurotrophin signaling pathway 13 0.1032 1.42E-05 4.02E-04
REACTOME_SIGNALING_BY_INSULIN_RECEPTOR 108 Genes involved in Signaling by Insulin receptor 12 0.1111 1.42E-05 4.02E-04
REACTOME_SOS_MEDIATED_SIGNALLING 14 Genes involved in SOS-mediated signalling 5 0.3571 1.46E-05 4.04E-04
REACTOME_SIGNALING_BY_EGFR_IN_CANCER 109 Genes involved in Signaling by EGFR in Cancer 12 0.1101 1.56E-05 4.24E-04
KEGG_ALZHEIMERS_DISEASE 169 Alzheimer's disease 15 0.0888 1.99E-05 5.22E-04
PID_HEDGEHOG_GLI_PATHWAY 48 Hedgehog signaling events mediated by Gli proteins 8 0.1667 2.00E-05 5.22E-04
REACTOME_SIGNALING_BY_SCF_KIT 78 Genes involved in Signaling by SCF-KIT 10 0.1282 2.09E-05 5.27E-04
REACTOME_SHC1_EVENTS_IN_EGFR_SIGNALING 15 Genes involved in SHC1 events in EGFR signaling 5 0.3333 2.14E-05 5.27E-04
REACTOME_SHC_MEDIATED_SIGNALLING 15 Genes involved in SHC-mediated signalling 5 0.3333 2.14E-05 5.27E-04
REACTOME_RESPIRATORY_ELECTRON_TRANSPORT 79 Genes involved in Respiratory electron transport 10 0.1266 2.34E-05 5.65E-04
REACTOME_METABOLISM_OF_LIPIDS_AND_LIPOPROTEINS 478 Genes involved in Metabolism of lipids and lipoproteins 28 0.0586 2.49E-05 5.91E-04
PID_LYMPH_ANGIOGENESIS_PATHWAY 25 VEGFR3 signaling in lymphatic endothelium 6 0.24 2.54E-05 5.91E-04
REACTOME_UNFOLDED_PROTEIN_RESPONSE 80 Genes involved in Unfolded Protein Response 10 0.125 2.61E-05 5.99E-04
KEGG_REGULATION_OF_ACTIN_CYTOSKELETON 216 Regulation of actin cytoskeleton 17 0.0787 2.74E-05 6.18E-04
REACTOME_RESPIRATORY_ELECTRON_TRANSPORT_ATP_SYNTHESIS_BY_CHEMIOSMOTIC_COUPLING_AND_HEAT_PRODUCTION_BY_UNCOUPLING_PROTEINS_ 98 Genes involved in Respiratory electron transport	ATP synthesis by chemiosmotic coupling	and heat production by uncoupling proteins. 11 0.1122 2.92E-05 6.47E-04
BIOCARTA_SHH_PATHWAY 16 Sonic Hedgehog (Shh) Pathway 5 0.3125 3.05E-05 6.65E-04
SIG_INSULIN_RECEPTOR_PATHWAY_IN_CARDIAC_MYOCYTES 51 Genes related to the insulin receptor pathway 8 0.1569 3.17E-05 6.79E-04
BIOCARTA_INTEGRIN_PATHWAY 38 Integrin Signaling Pathway 7 0.1842 3.38E-05 7.02E-04
KEGG_SNARE_INTERACTIONS_IN_VESICULAR_TRANSPORT 38 SNARE interactions in vesicular transport 7 0.1842 3.38E-05 7.02E-04
KEGG_MTOR_SIGNALING_PATHWAY 52 mTOR signaling pathway 8 0.1538 3.67E-05 7.50E-04
REACTOME_ACTIVATION_OF_THE_MRNA_UPON_BINDING_OF_THE_CAP_BINDING_COMPLEX_AND_EIFS_AND_SUBSEQUENT_BINDING_TO_43S 84 Genes involved in Activation of the mRNA upon binding of the cap-binding complex and eIFs	and subsequent binding to 43S 10 0.119 4.01E-05 8.06E-04
BIOCARTA_CREB_PATHWAY 27 Transcription factor CREB and its extracellular signals 6 0.2222 4.07E-05 8.06E-04
PID_TELOMERASE_PATHWAY 68 Regulation of Telomerase 9 0.1324 4.16E-05 8.07E-04
REACTOME_SHC_RELATED_EVENTS 17 Genes involved in SHC-related events 5 0.2941 4.24E-05 8.07E-04
PID_CXCR4_PATHWAY 102 CXCR4-mediated signaling events 11 0.1078 4.25E-05 8.07E-04
REACTOME_PROCESSING_OF_CAPPED_INTRON_CONTAINING_PRE_MRNA 140 Genes involved in Processing of Capped Intron-Containing Pre-mRNA 13 0.0929 4.37E-05 8.17E-04
PID_MTOR_4PATHWAY 69 mTOR signaling pathway 9 0.1304 4.68E-05 8.63E-04
REACTOME_CHROMOSOME_MAINTENANCE 122 Genes involved in Chromosome Maintenance 12 0.0984 4.84E-05 8.82E-04
REACTOME_LATE_PHASE_OF_HIV_LIFE_CYCLE 104 Genes involved in Late Phase of HIV Life Cycle 11 0.1058 5.09E-05 9.14E-04
KEGG_LONG_TERM_POTENTIATION 70 Long-term potentiation 9 0.1286 5.25E-05 9.18E-04
KEGG_RENAL_CELL_CARCINOMA 70 Renal cell carcinoma 9 0.1286 5.25E-05 9.18E-04
PID_ERBB1_DOWNSTREAM_PATHWAY 105 ErbB1 downstream signaling 11 0.1048 5.56E-05 9.60E-04
BIOCARTA_PTEN_PATHWAY 18 PTEN dependent cell cycle arrest and apoptosis 5 0.2778 5.75E-05 9.79E-04
REACTOME_PI_3K_CASCADE 56 Genes involved in PI-3K cascade 8 0.1429 6.35E-05 1.07E-03
REACTOME_RAF_MAP_KINASE_CASCADE 10 Genes involved in RAF/MAP kinase cascade 4 0.4 6.69E-05 1.11E-03
REACTOME_TRANSCRIPTION 210 Genes involved in Transcription 16 0.0762 6.89E-05 1.13E-03
REACTOME_FATTY_ACID_TRIACYLGLYCEROL_AND_KETONE_BODY_METABOLISM 168 Genes involved in Fatty acid	triacylglycerol	and ketone body metabolism 14 0.0833 7.41E-05 1.20E-03
REACTOME_FORMATION_OF_THE_TERNARY_COMPLEX_AND_SUBSEQUENTLY_THE_43S_COMPLEX 74 Genes involved in Formation of the ternary complex	and subsequently	the 43S complex 9 0.1216 8.18E-05 1.31E-03
PID_PDGFRB_PATHWAY 129 PDGFR-beta signaling pathway 12 0.093 8.35E-05 1.32E-03
REACTOME_DNA_REPLICATION 192 Genes involved in DNA Replication 15 0.0781 8.67E-05 1.36E-03
KEGG_ABC_TRANSPORTERS 44 ABC transporters 7 0.1591 9.04E-05 1.38E-03
PID_ERBB2_ERBB3_PATHWAY 44 ErbB2/ErbB3 signaling events 7 0.1591 9.04E-05 1.38E-03
REACTOME_LOSS_OF_NLP_FROM_MITOTIC_CENTROSOMES 59 Genes involved in Loss of Nlp from mitotic centrosomes 8 0.1356 9.29E-05 1.40E-03
REACTOME_MITOTIC_M_M_G1_PHASES 172 Genes involved in Mitotic M-M/G1 phases 14 0.0814 9.54E-05 1.43E-03
REACTOME_SHC1_EVENTS_IN_ERBB4_SIGNALING 20 Genes involved in SHC1 events in ERBB4 signaling 5 0.25 9.99E-05 1.47E-03
BIOCARTA_RHO_PATHWAY 32 Rho cell motility signaling pathway 6 0.1875 1.12E-04 1.64E-03
REACTOME_MITOCHONDRIAL_TRNA_AMINOACYLATION 21 Genes involved in Mitochondrial tRNA aminoacylation 5 0.2381 1.28E-04 1.85E-03
KEGG_OXIDATIVE_PHOSPHORYLATION 135 Oxidative phosphorylation 12 0.0889 1.29E-04 1.85E-03
PID_TRKR_PATHWAY 62 Neurotrophic factor-mediated Trk receptor signaling 8 0.129 1.33E-04 1.87E-03
REACTOME_POST_NMDA_RECEPTOR_ACTIVATION_EVENTS 33 Genes involved in Post NMDA receptor activation events 6 0.1818 1.34E-04 1.87E-03
REACTOME_METABOLISM_OF_AMINO_ACIDS_AND_DERIVATIVES 200 Genes involved in Metabolism of amino acids and derivatives 15 0.075 1.37E-04 1.87E-03
KEGG_FC_GAMMA_R_MEDIATED_PHAGOCYTOSIS 97 Fc gamma R-mediated phagocytosis 10 0.1031 1.37E-04 1.87E-03
REACTOME_MEIOSIS 116 Genes involved in Meiosis 11 0.0948 1.38E-04 1.87E-03
REACTOME_METABOLISM_OF_CARBOHYDRATES 247 Genes involved in Metabolism of carbohydrates 17 0.0688 1.44E-04 1.92E-03
KEGG_FOCAL_ADHESION 201 Focal adhesion 15 0.0746 1.44E-04 1.92E-03
REACTOME_MITOTIC_G1_G1_S_PHASES 137 Genes involved in Mitotic G1-G1/S phases 12 0.0876 1.49E-04 1.95E-03
BIOCARTA_CFTR_PATHWAY 12 Cystic Fibrosis Transmembrane Conductance Regulator And Beta 2 Adrenergic Receptor Pathway 4 0.3333 1.52E-04 1.98E-03
PID_IL2_PI3K_PATHWAY 34 IL2 signaling events mediated by PI3K 6 0.1765 1.60E-04 2.00E-03
PID_MAPK_TRK_PATHWAY 34 Trk receptor signaling mediated by the MAPK pathway 6 0.1765 1.60E-04 2.00E-03
REACTOME_ABC_FAMILY_PROTEINS_MEDIATED_TRANSPORT 34 Genes involved in ABC-family proteins mediated transport 6 0.1765 1.60E-04 2.00E-03
REACTOME_SIGNAL_TRANSDUCTION_BY_L1 34 Genes involved in Signal transduction by L1 6 0.1765 1.60E-04 2.00E-03
REACTOME_INFLUENZA_LIFE_CYCLE 203 Genes involved in Influenza Life Cycle 15 0.0739 1.61E-04 2.00E-03
REACTOME_GRB2_EVENTS_IN_ERBB2_SIGNALING 22 Genes involved in GRB2 events in ERBB2 signaling 5 0.2273 1.63E-04 2.00E-03
REACTOME_ASPARAGINE_N_LINKED_GLYCOSYLATION 81 Genes involved in Asparagine N-linked glycosylation 9 0.1111 1.66E-04 2.02E-03
REACTOME_GASTRIN_CREB_SIGNALLING_PATHWAY_VIA_PKC_AND_MAPK 205 Genes involved in Gastrin-CREB signalling pathway via PKC and MAPK 15 0.0732 1.79E-04 2.16E-03
PID_ARF6_TRAFFICKING_PATHWAY 49 Arf6 trafficking events 7 0.1429 1.82E-04 2.16E-03
REACTOME_METABOLISM_OF_NON_CODING_RNA 49 Genes involved in Metabolism of non-coding RNA 7 0.1429 1.82E-04 2.16E-03
REACTOME_GENERIC_TRANSCRIPTION_PATHWAY 352 Genes involved in Generic Transcription Pathway 21 0.0597 1.91E-04 2.25E-03
REACTOME_HIV_INFECTION 207 Genes involved in HIV Infection 15 0.0725 1.99E-04 2.31E-03
REACTOME_MYD88_MAL_CASCADE_INITIATED_ON_PLASMA_MEMBRANE 83 Genes involved in MyD88:Mal cascade initiated on plasma membrane 9 0.1084 2.00E-04 2.31E-03
REACTOME_RECRUITMENT_OF_MITOTIC_CENTROSOME_PROTEINS_AND_COMPLEXES 66 Genes involved in Recruitment of mitotic centrosome proteins and complexes 8 0.1212 2.07E-04 2.37E-03
REACTOME_PLATELET_ACTIVATION_SIGNALING_AND_AGGREGATION 208 Genes involved in Platelet activation	signaling and aggregation 15 0.0721 2.10E-04 2.39E-03
REACTOME_REGULATION_OF_MRNA_STABILITY_BY_PROTEINS_THAT_BIND_AU_RICH_ELEMENTS 84 Genes involved in Regulation of mRNA Stability by Proteins that Bind AU-rich Elements 9 0.1071 2.19E-04 2.47E-03
SIG_PIP3_SIGNALING_IN_B_LYMPHOCYTES 36 Genes related to PIP3 signaling in B lymphocytes 6 0.1667 2.22E-04 2.48E-03
REACTOME_CELL_CYCLE_CHECKPOINTS 124 Genes involved in Cell Cycle Checkpoints 11 0.0887 2.48E-04 2.75E-03
REACTOME_NUCLEAR_EVENTS_KINASE_AND_TRANSCRIPTION_FACTOR_ACTIVATION 24 Genes involved in Nuclear Events (kinase and transcription factor activation) 5 0.2083 2.52E-04 2.75E-03
SA_B_CELL_RECEPTOR_COMPLEXES 24 Antigen binding to B cell receptors activates protein tyrosine kinases	such as the Src family	which ultimate activate MAP kinases. 5 0.2083 2.52E-04 2.75E-03
REACTOME_ACTIVATION_OF_NMDA_RECEPTOR_UPON_GLUTAMATE_BINDING_AND_POSTSYNAPTIC_EVENTS 37 Genes involved in Activation of NMDA receptor upon glutamate binding and postsynaptic events 6 0.1622 2.59E-04 2.76E-03
REACTOME_NEGATIVE_REGULATION_OF_FGFR_SIGNALING 37 Genes involved in Negative regulation of FGFR signaling 6 0.1622 2.59E-04 2.76E-03
ST_P38_MAPK_PATHWAY 37 p38 MAPK Pathway 6 0.1622 2.59E-04 2.76E-03
REACTOME_HIV_LIFE_CYCLE 125 Genes involved in HIV Life Cycle 11 0.088 2.66E-04 2.81E-03
REACTOME_SIGNALING_BY_THE_B_CELL_RECEPTOR_BCR 126 Genes involved in Signaling by the B Cell Receptor (BCR) 11 0.0873 2.85E-04 2.98E-03
BIOCARTA_MCALPAIN_PATHWAY 25 mCalpain and friends in Cell motility 5 0.2 3.09E-04 3.18E-03
REACTOME_SMOOTH_MUSCLE_CONTRACTION 25 Genes involved in Smooth Muscle Contraction 5 0.2 3.09E-04 3.18E-03
KEGG_CELL_CYCLE 128 Cell cycle 11 0.0859 3.27E-04 3.34E-03
REACTOME_PHOSPHOLIPASE_C_MEDIATED_CASCADE 54 Genes involved in Phospholipase C-mediated cascade 7 0.1296 3.38E-04 3.42E-03
KEGG_PROSTATE_CANCER 89 Prostate cancer 9 0.1011 3.39E-04 3.42E-03
KEGG_MELANOMA 71 Melanoma 8 0.1127 3.44E-04 3.44E-03
BIOCARTA_BAD_PATHWAY 26 Regulation of BAD phosphorylation 5 0.1923 3.75E-04 3.72E-03
REACTOME_NFKB_AND_MAP_KINASES_ACTIVATION_MEDIATED_BY_TLR4_SIGNALING_REPERTOIRE 72 Genes involved in NFkB and MAP kinases activation mediated by TLR4 signaling repertoire 8 0.1111 3.79E-04 3.73E-03
REACTOME_SIGNALLING_TO_P38_VIA_RIT_AND_RIN 15 Genes involved in Signalling to p38 via RIT and RIN 4 0.2667 3.94E-04 3.85E-03
REACTOME_GLYCOSAMINOGLYCAN_METABOLISM 111 Genes involved in Glycosaminoglycan metabolism 10 0.0901 4.14E-04 3.98E-03
KEGG_CHRONIC_MYELOID_LEUKEMIA 73 Chronic myeloid leukemia 8 0.1096 4.17E-04 3.98E-03
REACTOME_MEIOTIC_SYNAPSIS 73 Genes involved in Meiotic Synapsis 8 0.1096 4.17E-04 3.98E-03
REACTOME_TRANSLATION 222 Genes involved in Translation 15 0.0676 4.21E-04 4.00E-03
BIOCARTA_NFAT_PATHWAY 56 NFAT and Hypertrophy of the heart (Transcription in the broken heart) 7 0.125 4.24E-04 4.00E-03
REACTOME_G1_S_TRANSITION 112 Genes involved in G1/S Transition 10 0.0893 4.45E-04 4.16E-03
REACTOME_CREB_PHOSPHORYLATION_THROUGH_THE_ACTIVATION_OF_RAS 27 Genes involved in CREB phosphorylation through the activation of Ras 5 0.1852 4.51E-04 4.16E-03
REACTOME_SIGNALLING_TO_RAS 27 Genes involved in Signalling to RAS 5 0.1852 4.51E-04 4.16E-03
KEGG_PARKINSONS_DISEASE 133 Parkinson's disease 11 0.0827 4.54E-04 4.16E-03
REACTOME_TRIF_MEDIATED_TLR3_SIGNALING 74 Genes involved in TRIF mediated TLR3 signaling 8 0.1081 4.57E-04 4.16E-03
REACTOME_IL_2_SIGNALING 41 Genes involved in Interleukin-2 signaling 6 0.1463 4.61E-04 4.17E-03
REACTOME_ACTIVATED_TLR4_SIGNALLING 93 Genes involved in Activated TLR4 signalling 9 0.0968 4.71E-04 4.23E-03
KEGG_B_CELL_RECEPTOR_SIGNALING_PATHWAY 75 B cell receptor signaling pathway 8 0.1067 5.01E-04 4.44E-03
REACTOME_TELOMERE_MAINTENANCE 75 Genes involved in Telomere Maintenance 8 0.1067 5.01E-04 4.44E-03
REACTOME_MITOCHONDRIAL_PROTEIN_IMPORT 58 Genes involved in Mitochondrial Protein Import 7 0.1207 5.27E-04 4.61E-03
REACTOME_TRNA_AMINOACYLATION 42 Genes involved in tRNA Aminoacylation 6 0.1429 5.27E-04 4.61E-03
BIOCARTA_GH_PATHWAY 28 Growth Hormone Signaling Pathway 5 0.1786 5.38E-04 4.64E-03
REACTOME_SHC_MEDIATED_CASCADE 28 Genes involved in SHC-mediated cascade 5 0.1786 5.38E-04 4.64E-03
KEGG_PATHOGENIC_ESCHERICHIA_COLI_INFECTION 59 Pathogenic Escherichia coli infection 7 0.1186 5.85E-04 5.02E-03
REACTOME_TRAF6_MEDIATED_INDUCTION_OF_NFKB_AND_MAP_KINASES_UPON_TLR7_8_OR_9_ACTIVATION 77 Genes involved in TRAF6 mediated induction of NFkB and MAP kinases upon TLR7/8 or 9 activation 8 0.1039 5.99E-04 5.08E-03
PID_TCPTP_PATHWAY 43 Signaling events mediated by TCPTP 6 0.1395 6.00E-04 5.08E-03
KEGG_THYROID_CANCER 29 Thyroid cancer 5 0.1724 6.37E-04 5.36E-03
REACTOME_ARMS_MEDIATED_ACTIVATION 17 Genes involved in ARMS-mediated activation 4 0.2353 6.61E-04 5.42E-03
REACTOME_DESTABILIZATION_OF_MRNA_BY_BRF1 17 Genes involved in Destabilization of mRNA by Butyrate Response Factor 1 (BRF1) 4 0.2353 6.61E-04 5.42E-03
REACTOME_DESTABILIZATION_OF_MRNA_BY_TRISTETRAPROLIN_TTP 17 Genes involved in Destabilization of mRNA by Tristetraprolin (TTP) 4 0.2353 6.61E-04 5.42E-03
REACTOME_PROTEOLYTIC_CLEAVAGE_OF_SNARE_COMPLEX_PROTEINS 17 Genes involved in Proteolytic cleavage of SNARE complex proteins 4 0.2353 6.61E-04 5.42E-03
PID_MYC_ACTIV_PATHWAY 79 Validated targets of C-MYC transcriptional activation 8 0.1013 7.11E-04 5.80E-03
REACTOME_MAPK_TARGETS_NUCLEAR_EVENTS_MEDIATED_BY_MAP_KINASES 30 Genes involved in MAPK targets/ Nuclear events mediated by MAP kinases 5 0.1667 7.49E-04 6.07E-03
REACTOME_G2_M_CHECKPOINTS 45 Genes involved in G2/M Checkpoints 6 0.1333 7.69E-04 6.19E-03
PID_MET_PATHWAY 80 Signaling events mediated by Hepatocyte Growth Factor Receptor (c-Met) 8 0.1 7.73E-04 6.19E-03
KEGG_COLORECTAL_CANCER 62 Colorectal cancer 7 0.1129 7.92E-04 6.30E-03
REACTOME_REGULATION_OF_SIGNALING_BY_CBL 18 Genes involved in Regulation of signaling by CBL 4 0.2222 8.34E-04 6.57E-03
REACTOME_M_G1_TRANSITION 81 Genes involved in M/G1 Transition 8 0.0988 8.40E-04 6.57E-03
REACTOME_MITOTIC_G2_G2_M_PHASES 81 Genes involved in Mitotic G2-G2/M phases 8 0.0988 8.40E-04 6.57E-03
PID_A6B1_A6B4_INTEGRIN_PATHWAY 46 a6b1 and a6b4 Integrin signaling 6 0.1304 8.66E-04 6.73E-03
PID_MYC_REPRESS_PATHWAY 63 Validated targets of C-MYC transcriptional repression 7 0.1111 8.72E-04 6.73E-03
PID_NEPHRIN_NEPH1_PATHWAY 31 Nephrin/Neph1 signaling in the kidney podocyte 5 0.1613 8.75E-04 6.73E-03
KEGG_CHEMOKINE_SIGNALING_PATHWAY 190 Chemokine signaling pathway 13 0.0684 8.85E-04 6.76E-03
ST_INTEGRIN_SIGNALING_PATHWAY 82 Integrin Signaling Pathway 8 0.0976 9.11E-04 6.92E-03
REACTOME_SIGNALING_BY_NOTCH 103 Genes involved in Signaling by NOTCH 9 0.0874 9.90E-04 7.47E-03
NABA_MATRISOME 1028 Ensemble of genes encoding extracellular matrix and extracellular matrix-associated proteins 42 0.0409 1.02E-03 7.68E-03
REACTOME_BOTULINUM_NEUROTOXICITY 19 Genes involved in Botulinum neurotoxicity 4 0.2105 1.04E-03 7.69E-03
REACTOME_PROLONGED_ERK_ACTIVATION_EVENTS 19 Genes involved in Prolonged ERK activation events 4 0.2105 1.04E-03 7.69E-03
PID_ERA_GENOMIC_PATHWAY 65 Validated nuclear estrogen receptor alpha network 7 0.1077 1.05E-03 7.77E-03
REACTOME_DEADENYLATION_DEPENDENT_MRNA_DECAY 48 Genes involved in Deadenylation-dependent mRNA decay 6 0.125 1.09E-03 7.99E-03
REACTOME_RNA_POL_II_TRANSCRIPTION 105 Genes involved in RNA Polymerase II Transcription 9 0.0857 1.14E-03 8.29E-03
PID_HDAC_CLASSI_PATHWAY 66 Signaling events mediated by HDAC Class I 7 0.1061 1.15E-03 8.32E-03
PID_INTEGRIN1_PATHWAY 66 Beta1 integrin cell surface interactions 7 0.1061 1.15E-03 8.32E-03
BIOCARTA_NO1_PATHWAY 33 Actions of Nitric Oxide in the Heart 5 0.1515 1.17E-03 8.39E-03
REACTOME_TRANSPORT_OF_MATURE_MRNA_DERIVED_FROM_AN_INTRONLESS_TRANSCRIPT 33 Genes involved in Transport of Mature mRNA Derived from an Intronless Transcript 5 0.1515 1.17E-03 8.39E-03
PID_PI3KCI_PATHWAY 49 Class I PI3K signaling events 6 0.1224 1.22E-03 8.64E-03
KEGG_PROGESTERONE_MEDIATED_OOCYTE_MATURATION 86 Progesterone-mediated oocyte maturation 8 0.093 1.25E-03 8.76E-03
REACTOME_L1CAM_INTERACTIONS 86 Genes involved in L1CAM interactions 8 0.093 1.25E-03 8.76E-03
SIG_PIP3_SIGNALING_IN_CARDIAC_MYOCTES 67 Genes related to PIP3 signaling in cardiac myocytes 7 0.1045 1.26E-03 8.81E-03
REACTOME_SIGNALING_BY_ILS 107 Genes involved in Signaling by Interleukins 9 0.0841 1.30E-03 9.02E-03
KEGG_ERBB_SIGNALING_PATHWAY 87 ErbB signaling pathway 8 0.092 1.34E-03 9.27E-03
PID_HDAC_CLASSII_PATHWAY 34 Signaling events mediated by HDAC Class II 5 0.1471 1.35E-03 9.27E-03
REACTOME_MAP_KINASE_ACTIVATION_IN_TLR_CASCADE 50 Genes involved in MAP kinase activation in TLR cascade 6 0.12 1.35E-03 9.27E-03
KEGG_T_CELL_RECEPTOR_SIGNALING_PATHWAY 108 T cell receptor signaling pathway 9 0.0833 1.38E-03 9.44E-03
REACTOME_3_UTR_MEDIATED_TRANSLATIONAL_REGULATION 176 Genes involved in 3' -UTR-mediated translational regulation 12 0.0682 1.42E-03 9.60E-03
REACTOME_S_PHASE 109 Genes involved in S Phase 9 0.0826 1.48E-03 9.97E-03
REACTOME_TRANSMEMBRANE_TRANSPORT_OF_SMALL_MOLECULES 413 Genes involved in Transmembrane transport of small molecules 21 0.0508 1.50E-03 1.00E-02
KEGG_P53_SIGNALING_PATHWAY 69 p53 signaling pathway 7 0.1014 1.50E-03 1.00E-02
BIOCARTA_TFF_PATHWAY 21 Trefoil Factors Initiate Mucosal Healing 4 0.1905 1.54E-03 1.01E-02
